# Supplementary material for: Synthesis and evaluation of chiral β-amino acid-based low-molecular-weight organogelators possessing a methyl/trifluoromethyl side chain
Source: Royal Society of Chemistry journal article supplement (doi:10.1039/c8nj05668d), 2018-12-11
Supplement: c8nj05668d1.pdf [file c8nj05668d1.pdf]

# Synthesis and evaluation of chiral $\beta$ -amino acid-based low-molecular-weight organogelators possessing a methyl/trifluoromethyl side chain

Koichi Kodama\*, Ryuta Kawamata and Takuji Hirose

*Graduate School of Science and Engineering, Saitama University*

*255 Shimo-ohkubo, Sakura-ku, Saitama City, Saitama 338-8570, Japan*

---

## Table of Contents

---

|                                                                                            |          |
|--------------------------------------------------------------------------------------------|----------|
| Synthesis and characterization of the compounds                                            | S2-S11   |
| Figure S1 and Table S1                                                                     | S12-S13  |
| References                                                                                 | S14      |
| Copies of $^1\text{H}$ NMR, $^{13}\text{C}$ NMR, $^{19}\text{F}$ NMR charts and IR spectra | S15-S101 |

---

## Synthesis and characterization of the compounds

Compounds (*S*)-**1<sub>n</sub>** were synthesized following the reactions shown in Scheme S1. The intermediate (*S*)-**6** was synthesized according to the literature.<sup>1</sup>

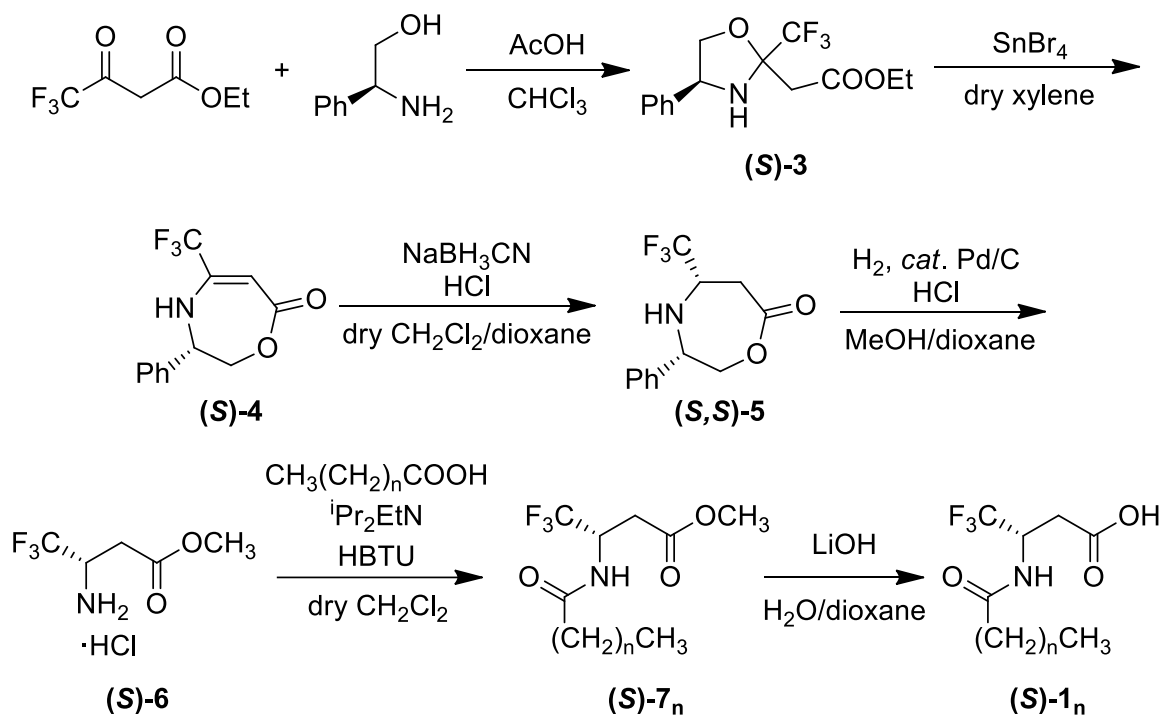

Scheme S1 Synthesis of (*S*)-**1<sub>n</sub>**

**(*S*)-4-phenyl-2-trifluoromethyl-2-oxazolidineacetic acid ethyl ester ((*S*)-**3**).** Under a nitrogen atmosphere, to a solution of (*S*)-phenylglycinol (2.96 g, 21.6 mmol) in CHCl<sub>3</sub> (50 ml) were added acetic acid (3.89 g, 64.8 mmol) and ethyl 4,4,4-trifluoroacetoacetate (4.02 g, 21.8 mmol) at room temperature. The solution was refluxed for 24 h. To the reaction mixture was added *sat.* Na<sub>2</sub>CO<sub>3</sub> *aq.* and the aqueous layer was extracted with CHCl<sub>3</sub> three times. The organic layer was dried over anhydrous Na<sub>2</sub>SO<sub>4</sub> and concentrated under reduced pressure. The residue was purified by Kugelrohr distillation (4.5 mmHg, 150 °C) to obtain (*S*)-**3** (5.10 g, 16.8 mmol, 78%) as colorless liquid. <sup>1</sup>H NMR (300 MHz, CDCl<sub>3</sub>): δ (ppm) 7.50-7.26 (m, 5H), 4.62-4.49 (m, 1H), 4.33-4.18 (m, 3H), 3.89 (d, 1H, *J* = 10.5 Hz), 3.72-3.66 (m, 1H), 3.03 (d, 1H, *J* = 15.3 Hz), 2.84 (d, 1H, *J* = 15.3 Hz), 1.30 (t, 3H, *J* = 7.2 Hz). <sup>19</sup>F NMR (282 MHz, CDCl<sub>3</sub>): δ (ppm) -83.7. IR (neat): ν (cm<sup>-1</sup>) 2983, 1731, 1472, 1307, 1203, 1170, 1031, 702.

**(*S*)-2,3,4,7-tetrahydro-3-phenyl-5-trifluoromethyl-1,4-oxazepine-7-one ((*S*)-**4**).** Under a nitrogen atmosphere, to a solution of (*S*)-**3** (0.754 g, 2.49 mmol) in dry *o*-xylene (40 ml) was added freshly distilled SnBr<sub>4</sub> (0.334 g, 0.762 mmol) at room temperature. The solution was refluxed for 24 h. To

the reaction mixture was added water at 0 °C and the aqueous layer was extracted with CHCl<sub>3</sub> three times. The organic layer was dried over anhydrous Na<sub>2</sub>SO<sub>4</sub> and concentrated under reduced pressure. The residue was purified by silica-gel column chromatography (eluent; hexane:EtOAc = 1 : 1) to obtain (*S*)-**4** (0.533 g, 2.07 mmol, 83%) as a white powder. Mp. 119.9-122.2 °C. <sup>1</sup>H NMR (300 MHz, CDCl<sub>3</sub>): δ (ppm) 7.50-7.41 (m, 3H), 7.35-7.29 (m, 2H), 5.31 (d, 1H, *J* = 2.4 Hz), 5.20 (s, 1H), 4.84 (d, 1H, *J* = 7.2 Hz), 4.60 (dd, 1H, *J*<sub>1</sub> = 12.9 Hz, *J*<sub>2</sub> = 7.2 Hz), 4.40 (d, 1H, *J* = 12.9 Hz). <sup>19</sup>F NMR (282 MHz, CDCl<sub>3</sub>): δ (ppm) -70.5. IR (KBr): ν (cm<sup>-1</sup>) 3282, 3107, 3027, 2979, 1677, 1638, 1566, 1495, 1453, 1423, 1389, 1361.

**(*S*)-2,3,4,5,6,7-hexahydro-3-phenyl-5-trifluoromethyl-1,4-oxazepine-7-one ((*S,S*)-**5**).** Under a nitrogen atmosphere, to a solution of NaBH<sub>3</sub>CN (1.05 g, 16.7 mmol) in CH<sub>2</sub>Cl<sub>2</sub> (60 ml) was added a solution of (*S*)-**4** (3.42 g, 13.3 mmol) in 4M HCl / dioxane (30 ml) and CHCl<sub>3</sub> (30 ml) at -78 °C. The mixture was stirred at room temperature for 2 days. To the reaction mixture was added *sat.* NaHCO<sub>3</sub> aq. at 0 °C and extracted with CHCl<sub>3</sub>. The organic layer was dried over anhydrous Na<sub>2</sub>SO<sub>4</sub> and concentrated under reduced pressure. The residue was purified by silica-gel column chromatography (eluent; CHCl<sub>3</sub>) to obtain (*S,S*)-**5** (2.33 g, 8.99 mmol, 68%) as a white powder. Mp 140.2-143.0 °C. <sup>1</sup>H NMR (300 MHz, CDCl<sub>3</sub>): δ (ppm) 7.44-7.32 (m, 5H), 4.36 (dd, 1H, *J*<sub>1</sub> = 13.2 Hz, *J*<sub>2</sub> = 8.7 Hz), 4.22-4.14 (m, 2H), 3.87-3.65 (m, 1H), 3.08-3.04 (m, 2H), 2.35 (br, 1H). <sup>19</sup>F NMR (282 MHz, CDCl<sub>3</sub>): δ (ppm) -78.7. IR (KBr): ν (cm<sup>-1</sup>) 3332, 1739, 1602, 1491, 1470, 1454, 1432, 1394, 1321, 1187.

**(*S*)-3-amino-4,4,4-trifluorobutyric acid methyl ester hydrochloride ((*S*)-**6**).** To the solution of (*S,S*)-**5** (1.32 g, 5.09 mmol) in MeOH (30 ml) was added 10% Pd/C (0.557 g) and 4M HCl / dioxane (13 ml). The air inside the flask was replaced with H<sub>2</sub> and the mixture was stirred at room temperature for 1 day. After the solid Pd/C was filtered off by use of celite, the filtrate was concentrated under reduced pressure to obtain (*S*)-**6** (0.778 g, 3.75 mmol, 74%) as a white powder. Mp. 93.0-96.0 °C. <sup>1</sup>H NMR (300 MHz, CDCl<sub>3</sub>/CD<sub>3</sub>OD): δ (ppm) 4.44-4.24 (m, 1H), 3.80 (s, 3H), 3.59 (br, 3H), 3.16-2.92 (m, 2H). <sup>19</sup>F NMR (282 MHz, CDCl<sub>3</sub>): δ (ppm) -75.4. IR (KBr): ν (cm<sup>-1</sup>) 3395, 2856, 1744, 1588, 1528, 1443, 1389, 1329, 1286, 1203, 1157, 1098, 1069, 908, 655.

***N*-octanoyl-(*S*)-3-amino-4,4,4-trifluorobutyric acid methyl ester ((*S*)-**7**<sub>6</sub>).** Under a nitrogen atmosphere, to a solution of octanoic acid (0.198 g, 1.22 mmol) in CH<sub>2</sub>Cl<sub>2</sub> (15 ml) was added *O*-(benzotriazol-1-yl)-*N,N,N',N'*-tetramethyluronium hexafluorophosphate (HBTU) (0.458 g, 1.21 mmol) and the mixture was stirred at 0 °C for 30 min. Then to the mixture was added (*S*)-**6** (0.251 g, 1.20 mmol) and <sup>1</sup>Pr<sub>2</sub>NEt (0.778 g, 6.02 mmol) and stirred at room temperature for 3 days. Ethyl acetate was added to the reaction mixture and the organic layer was washed with 1 N HCl aq., *sat.* NaHCO<sub>3</sub> aq. and brine. The organic layer was dried over anhydrous Na<sub>2</sub>SO<sub>4</sub> and concentrated under reduced pressure. The residue was purified by silica-gel column chromatography (eluent;

toluene:EtOAc = 7 : 1) to obtain (*S*)-**7<sub>6</sub>** (0.108 g, 0.363 mmol, 30%) as a white powder. Mp: 65-68 °C. <sup>1</sup>H NMR (300 MHz, CDCl<sub>3</sub>): δ (ppm) 6.32 (d, 1H, *J* = 8.7 Hz), 5.11-4.99 (m, 1H), 3.73 (s, 3H), 2.78-2.63 (m, 2H), 2.24 (t, 2H, *J* = 7.5 Hz), 1.71-1.58 (m, 2H), 1.38-1.22 (m, 8H), 0.88 (t, 3H, *J* = 6.6 Hz). <sup>13</sup>C NMR (100 MHz, CDCl<sub>3</sub>): δ (ppm) 172.8, 170.1, 124.6 (q, *J* = 280 Hz), 52.4, 47.2 (q, *J* = 32 Hz), 36.5, 32.9, 31.7, 29.0, 28.9, 25.4, 22.6, 14.0. <sup>19</sup>F NMR (282 MHz, CDCl<sub>3</sub>): δ (ppm) -76.7. IR (KBr) : ν (cm<sup>-1</sup>) 3288, 3076, 2929, 2853, 1741, 1664, 1549, 1352, 1304, 1234, 1176, 1119, 665. MS(MALDI-TOF): *m/z* calcd for [C<sub>13</sub>H<sub>22</sub>F<sub>3</sub>NO<sub>3</sub> + Na]<sup>+</sup> 320.14, found 320.15.

***N*-nonanoyl-(*S*)-3-amino-4,4,4-trifluorobutyric acid methyl ester ((*S*)-**7<sub>7</sub>**).** (*S*)-**7<sub>7</sub>** was synthesized by the same procedure as (*S*)-**7<sub>6</sub>** from nonanoic acid and obtained as a white solid (72%). Mp. 74.0-75.0 °C. <sup>1</sup>H NMR (500 MHz, CDCl<sub>3</sub>): δ (ppm) 6.32 (d, 1H, *J* = 9.5 Hz), 5.11-4.99 (m, 1H), 3.73 (s, 3H), 2.78-2.63 (m, 2H), 2.24 (t, 2H, *J* = 8.0 Hz), 1.68-1.60 (m, 2H), 1.38-1.22 (m, 10H), 0.88 (t, 3H, *J* = 7.0 Hz). <sup>13</sup>C NMR (100 MHz, CDCl<sub>3</sub>): δ (ppm) 172.8, 170.1, 124.6 (q, *J* = 280 Hz), 52.4, 47.2 (q, *J* = 32 Hz), 36.5, 32.9, 31.8, 29.2, 29.1, 29.1, 25.4, 22.6, 14.1. <sup>19</sup>F NMR (282 MHz, CDCl<sub>3</sub>): δ (ppm) -76.7. IR (KBr): ν (cm<sup>-1</sup>) 3293, 2934, 1739, 1666, 1549, 1351, 1303, 1238, 1179, 1119, 921, 665. MS(MALDI-TOF): *m/z* calcd for [C<sub>14</sub>H<sub>24</sub>F<sub>3</sub>NO<sub>3</sub> + Na]<sup>+</sup> 334.16, found 334.18.

***N*-decanoyl-(*S*)-3-amino-4,4,4-trifluorobutyric acid methyl ester ((*S*)-**7<sub>8</sub>**).** (*S*)-**7<sub>8</sub>** was synthesized by the same procedure as (*S*)-**7<sub>6</sub>** from decanoic acid and obtained as a white solid (55%). Mp. 79.5-80.0 °C. <sup>1</sup>H NMR (500 MHz, CDCl<sub>3</sub>): δ (ppm) 6.32 (d, 1H, *J* = 9.0 Hz), 5.11-4.99 (m, 1H), 3.73 (s, 3H), 2.78-2.63 (m, 2H), 2.24 (t, 2H, *J* = 7.5 Hz), 1.68-1.59 (m, 2H), 1.38-1.22 (m, 12H), 0.88 (t, 3H, *J* = 7.0 Hz). <sup>13</sup>C NMR (100 MHz, CDCl<sub>3</sub>): δ (ppm) 172.8, 170.1, 124.6 (q, *J* = 280 Hz), 52.4, 47.2 (q, *J* = 32 Hz), 36.5, 32.9, 31.9, 29.4, 29.3, 29.2, 29.1, 25.4, 22.7, 14.1. <sup>19</sup>F NMR (282 MHz, CDCl<sub>3</sub>): δ (ppm) -76.6. IR (KBr): ν (cm<sup>-1</sup>) 3285, 2918, 2851, 1741, 1662, 1550, 1352, 1304, 1235, 1176, 1119, 924, 666. MS(MALDI-TOF): *m/z* calcd for [C<sub>15</sub>H<sub>26</sub>F<sub>3</sub>NO<sub>3</sub> + Na]<sup>+</sup> 348.18, found 348.21.

***N*-undecanoyl-(*S*)-3-amino-4,4,4-trifluorobutyric acid methyl ester ((*S*)-**7<sub>9</sub>**).** (*S*)-**7<sub>9</sub>** was synthesized by the same procedure as (*S*)-**7<sub>6</sub>** from undecanoic acid and obtained as a white solid (68%). Mp. 80.0-82.0 °C. <sup>1</sup>H NMR (300 MHz, CDCl<sub>3</sub>): δ (ppm) 6.32 (d, 1H, *J* = 9.0 Hz), 5.11-4.99 (m, 1H), 3.73 (s, 3H), 2.78-2.63 (m, 2H), 2.24 (t, 2H, *J* = 7.2 Hz), 1.71-1.58 (m, 2H), 1.38-1.18 (m, 14H), 0.88 (t, 3H, *J* = 6.6 Hz). <sup>13</sup>C NMR (100 MHz, CDCl<sub>3</sub>): δ (ppm) 172.8, 170.1, 124.6 (q, *J* = 280 Hz), 52.4, 47.2 (q, *J* = 32 Hz), 36.6, 32.9, 31.9, 29.5, 29.5, 29.3, 29.1, 25.4, 22.7, 14.1. <sup>19</sup>F NMR (282 MHz, CDCl<sub>3</sub>): δ (ppm) -76.6. IR (KBr): ν (cm<sup>-1</sup>) 3292, 2917, 2850, 1742, 1666, 1550, 1352, 1300, 1181, 1119, 922, 665. MS(MALDI-TOF): *m/z* calcd for [C<sub>16</sub>H<sub>28</sub>F<sub>3</sub>NO<sub>3</sub> + Na]<sup>+</sup> 362.19, found 362.25.

***N*-dodecanoyl-(*S*)-3-amino-4,4,4-trifluorobutyric acid methyl ester ((*S*)-**7<sub>10</sub>**).** (*S*)-**7<sub>10</sub>** was synthesized by the same procedure as (*S*)-**7<sub>6</sub>** from dodecanoic acid and obtained as a white solid



(66%). Mp. 88.0-89.5 °C. <sup>1</sup>H NMR (300 MHz, CDCl<sub>3</sub>): δ (ppm) 6.32 (d, 1H, *J* = 9.3 Hz), 5.11-4.99 (m, 1H), 3.73 (s, 3H), 2.78-2.63 (m, 2H), 2.24 (t, 2H, *J* = 7.2 Hz), 1.71-1.58 (m, 2H), 1.38-1.20 (m, 16H), 0.88 (t, 3H, *J* = 6.6 Hz). <sup>13</sup>C NMR (100 MHz, CDCl<sub>3</sub>): δ (ppm) 172.8, 170.0, 124.6 (q, *J* = 280 Hz), 52.3, 47.2 (q, *J* = 32 Hz), 36.5, 32.9, 31.9, 29.6, 29.4, 29.3, 29.3, 29.1, 25.4, 22.7, 14.1. <sup>19</sup>F NMR (282 MHz, CDCl<sub>3</sub>): δ (ppm) -76.7. IR (KBr): ν (cm<sup>-1</sup>) 3285, 2917, 2850, 1741, 1662, 1550, 1353, 1305, 1234, 1185, 1119, 922, 666. MS(MALDI-TOF): *m/z* calcd for [C<sub>17</sub>H<sub>30</sub>F<sub>3</sub>NO<sub>3</sub> + Na]<sup>+</sup> 376.21, found 376.24.

***N*-octanoyl-(*S*)-3-amino-4,4,4-trifluorobutyric acid ((*S*)-16).** To the solution of (*S*)-76 (52.8 mg, 0.178 mmol) in 1,4-dioxane (13 ml) and H<sub>2</sub>O (9.0 ml) was added LiOH·H<sub>2</sub>O (75.3 mg, 1.79 mmol) at 0 °C and the solution was stirred for 1 day. Ethyl acetate was added to the reaction mixture and the organic layer was washed with 1M HCl aq. The organic layer was dried over anhydrous Na<sub>2</sub>SO<sub>4</sub> and then concentrated under reduced pressure to obtain (*S*)-16 (50.3 mg, 0.178 mmol, quant) as a white powder. Mp. 118.0-120.0 °C. <sup>1</sup>H NMR (300 MHz, CDCl<sub>3</sub>/CD<sub>3</sub>OD): δ (ppm) 5.11-4.95 (m, 1H), 2.74 (dd, 1H, *J*<sub>1</sub> = 16.0 Hz, *J*<sub>2</sub> = 4.7 Hz), 2.60 (dd, 1H, *J*<sub>1</sub> = 16.0 Hz, *J*<sub>2</sub> = 7.8 Hz), 2.23 (t, 2H, *J* = 7.7 Hz), 1.70-1.57 (m, 2H), 1.38-1.21 (m, 8H), 0.88 (t, 3H, *J* = 6.6 Hz). <sup>13</sup>C NMR (100 MHz, CDCl<sub>3</sub>): δ (ppm) 173.3, 172.2, 124.5 (q, *J* = 280 Hz), 47.2 (q, *J* = 32 Hz), 36.5, 32.7, 31.6, 29.0, 28.9, 25.4, 22.6, 14.0. <sup>19</sup>F NMR (282 MHz, CDCl<sub>3</sub>): δ (ppm) -77.0. IR (KBr): ν (cm<sup>-1</sup>) 3297, 2914, 2849, 1707, 1666, 1548, 1372, 1328, 1204, 1125, 936, 652. MS(MALDI-TOF): *m/z* calcd for [C<sub>12</sub>H<sub>20</sub>F<sub>3</sub>NO<sub>3</sub> + Na]<sup>+</sup> 306.13, found 306.17.

***N*-nonanoyl-(*S*)-3-amino-4,4,4-trifluorobutyric acid ((*S*)-17).** (*S*)-17 was synthesized by the same procedure as (*S*)-16 from (*S*)-77 and obtained as a white solid (96%). Mp. 125.0-127.5 °C. <sup>1</sup>H NMR (500 MHz, CDCl<sub>3</sub>): δ (ppm) 6.27 (d, 1H, *J* = 9.5 Hz), 5.15-5.04 (m, 1H), 2.84-2.66 (m, 2H), 2.25 (t, 2H, *J* = 7.5 Hz), 1.71-1.58 (m, 2H), 1.38-1.20 (m, 10H), 0.88 (t, 3H, *J* = 6.5 Hz). <sup>13</sup>C NMR (100 MHz, CDCl<sub>3</sub>/CD<sub>3</sub>OD): δ (ppm) 173.4, 124.7 (q, *J* = 280 Hz), 47.3 (q, *J* = 32 Hz), 36.4, 31.8, 29.3, 29.1, 29.1, 25.5, 22.6, 14.1. <sup>19</sup>F NMR (282 MHz, CDCl<sub>3</sub>): δ (ppm) -76.9. IR (KBr): ν (cm<sup>-1</sup>) 3295, 2914, 2849, 1705, 1667, 1543, 1372, 1255, 1205, 1124, 939, 651. MS(MALDI-TOF): *m/z* calcd for [C<sub>13</sub>H<sub>22</sub>F<sub>3</sub>NO<sub>3</sub> + Na]<sup>+</sup> 320.14, found 320.18.

***N*-decanoyl-(*S*)-3-amino-4,4,4-trifluorobutyric acid ((*S*)-18).** (*S*)-18 was synthesized by the same procedure as (*S*)-16 from (*S*)-78 and obtained as a white solid (83%). Mp. 125.0-127.5 °C. <sup>1</sup>H NMR (500 MHz, CDCl<sub>3</sub>): δ (ppm) 6.25 (d, 1H, *J* = 9.5 Hz), 5.15-5.04 (m, 1H), 2.84-2.66 (m, 2H), 2.25 (t, 2H, *J* = 7.0 Hz), 1.69-1.58 (m, 2H), 1.38-1.20 (m, 12H), 0.88 (t, 3H, *J* = 7.0 Hz). <sup>13</sup>C NMR (100 MHz, CDCl<sub>3</sub>/CD<sub>3</sub>OD): δ (ppm) 173.3, 171.5, 124.7 (q, *J* = 280 Hz), 47.2 (q, *J* = 32 Hz), 36.5, 32.8, 31.9, 29.4, 29.3, 29.3, 29.1, 25.4, 22.7, 14.1. <sup>19</sup>F NMR (282 MHz, CDCl<sub>3</sub>): δ (ppm) -76.9. IR (KBr): ν (cm<sup>-1</sup>) 3295, 2916, 2849, 1705, 1667, 1549, 1373, 1204, 1125, 936, 653. MS(MALDI-TOF): *m/z*

calcd for  $[C_{14}H_{24}F_3NO_3 + Na]^+$  334.16, found 334.22.

***N*-undecanoyl-(*S*)-3-amino-4,4,4-trifluorobutyric acid ((*S*)-19).** (*S*)-19 was synthesized by the same procedure as (*S*)-16 from (*S*)-79 and obtained as a white solid (82%). Mp. 127.0-130.0 °C.  $^1H$  NMR (400 MHz,  $CDCl_3/CD_3OD$ ):  $\delta$  (ppm) 5.10-4.95 (m, 1H), 2.77-2.57 (m, 2H), 2.23 (t, 2H,  $J = 7.6$  Hz), 1.69-1.58 (m, 2H), 1.38-1.20 (m, 14H), 0.88 (t, 3H,  $J = 6.8$  Hz).  $^{13}C$  NMR (100 MHz,  $CDCl_3/CD_3OD$ ):  $\delta$  (ppm) 173.4, 171.5, 124.7 (q,  $J = 280$  Hz), 47.3 (q,  $J = 32$  Hz), 36.5, 32.9, 31.9, 29.6, 29.5, 29.3, 29.1, 25.5, 22.7, 14.1.  $^{19}F$  NMR (282 MHz,  $CDCl_3$ ):  $\delta$  (ppm) -76.6. IR (KBr):  $\nu$  ( $cm^{-1}$ ) 3294, 2916, 2849, 1706, 1667, 1547, 1371, 1253, 1203, 1124, 936, 651. MS(MALDI-TOF):  $m/z$  calcd for  $[C_{15}H_{26}F_3NO_3 + Na]^+$  348.18, found 348.21.

***N*-dodecanoyl-(*S*)-3-amino-4,4,4-trifluorobutyric acid ((*S*)-110).** (*S*)-110 was synthesized by the same procedure as (*S*)-16 from (*S*)-710 and obtained as a white solid (quant.). Mp. 127.0-129.0 °C.  $^1H$  NMR (500 MHz,  $CD_3OD$ ):  $\delta$  (ppm) 5.10-4.95 (m, 1H), 2.78 (dd, 1H,  $J_1 = 16.0$  Hz,  $J_2 = 4.0$  Hz), 2.59 (dd, 1H,  $J_1 = 16.5$  Hz,  $J_2 = 10.5$  Hz), 2.21 (t, 2H,  $J = 7.0$  Hz), 1.69-1.58 (m, 2H), 1.38-1.20 (m, 16H), 0.89 (t, 3H,  $J = 7.0$  Hz).  $^{13}C$  NMR (100 MHz,  $CDCl_3/CD_3OD$ ):  $\delta$  (ppm) 173.3, 171.5, 124.7 (q,  $J = 280$  Hz), 47.2 (q,  $J = 32$  Hz), 36.5, 32.8, 31.9, 29.6, 29.5, 29.4, 29.3, 29.1, 25.5, 22.7, 14.1.  $^{19}F$  NMR (282 MHz,  $CDCl_3$ ):  $\delta$  (ppm) -76.6. IR (KBr):  $\nu$  ( $cm^{-1}$ ) 3294, 2916, 2849, 1705, 1667, 1543, 1373, 1206, 1125, 937, 652. MS(MALDI-TOF):  $m/z$  calcd for  $[C_{16}H_{28}F_3NO_3 + Na]^+$  362.19, found 362.24.

The compound *rac*-16 was synthesized following the reactions shown in Scheme S2. The intermediate *rac*-10 was synthesized according to the literature.<sup>2</sup>

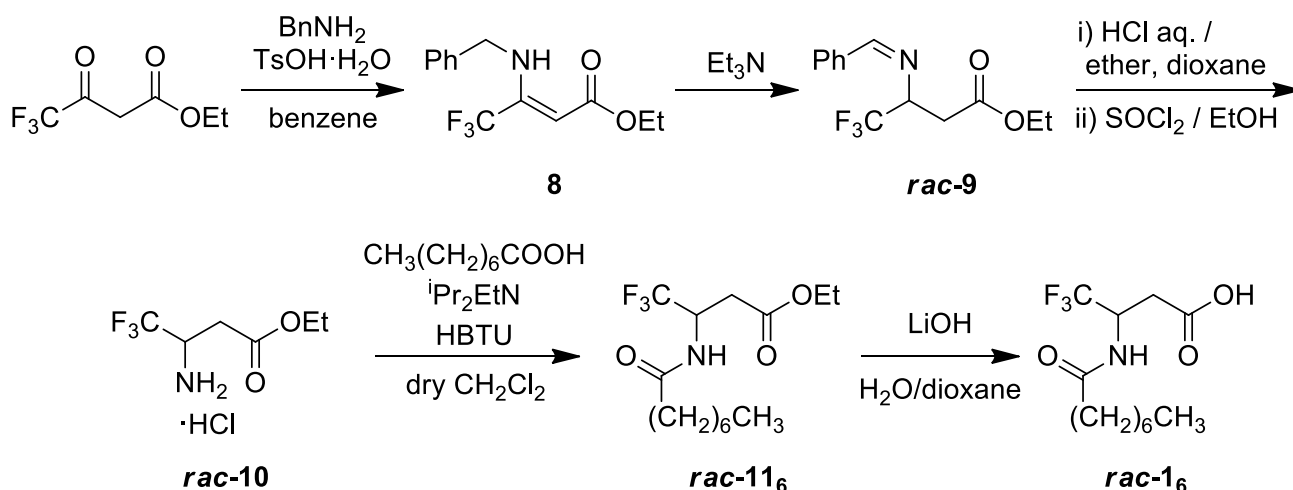

Scheme S2 Synthesis of *rac*-16

**3-benzylamino-4,4,4-trifluoro-but-2-enoic acid ethyl ester (8).** Benzylamine (643 mg, 6.00 mmol)

was added dropwise to the solution of ethyl 4,4,4-trifluoroacetoacetate (1.00 g, 5.45 mmol) and *p*-TsOH·H<sub>2</sub>O (47.2 mg / 0.274 mmol) in benzene (20 ml) at room temperature. The mixture was heated using the Dean-Stark apparatus for 1 day to remove water. After filtration, the solvent was removed under reduced pressure and the target product **8** (1.00 g, 3.66 mmol, 67%) was obtained as colorless liquid. <sup>1</sup>H NMR (300 MHz, CDCl<sub>3</sub>): δ (ppm) 8.46 (s, 1H), 7.43-7.28 (m, 5H), 5.18 (s, 1H), 4.49 (d, 2H, *J* = 6.3 Hz), 4.16 (q, 2H, *J* = 7.2 Hz), 1.29 (t, 3H, *J* = 7.2 Hz). <sup>19</sup>F NMR (282 MHz, CDCl<sub>3</sub>): δ (ppm) -67.6. IR (neat): ν (cm<sup>-1</sup>) 2983, 1675, 1635, 1296, 1208, 1139, 1040, 799, 734, 666.

***N*-benzylidene-3-amino-4,4,4-trifluorobutyric acid ethyl ester (*rac*-9).** Triethylamine (16 ml) was added dropwise to **8** (744 mg, 2.72 mmol) at room temperature and the solution was refluxed for 3 days. The mixture was purified by Kugelrohr distillation (9.0 mmHg, 130-135 °C) to obtain *rac*-**9** (550 mg, 2.01 mmol, 73%) as colorless liquid. <sup>1</sup>H NMR (300 MHz, CDCl<sub>3</sub>): δ (ppm) 8.42 (s, 1H), 7.82-7.75 (m, 2H), 7.50-7.39 (m, 3H), 4.30-4.16 (m, 1H), 4.16-4.05 (m, 2H), 2.91 (d, 2H, *J* = 6.3 Hz), 1.20 (t, 3H, *J* = 7.2 Hz). <sup>19</sup>F NMR (282 MHz, CDCl<sub>3</sub>): δ (ppm) -76.1. IR (neat): ν (cm<sup>-1</sup>) 2986, 2894, 1736, 1649, 1582, 1453, 1272, 1173, 1129, 1061, 1025, 885, 758, 694.

**3-amino-4,4,4-trifluorobutyric acid ethyl ester hydrochloride (*rac*-10).** The solution of *rac*-**9** (548 mg, 2.01 mmol) in diethyl ether (1.4 ml) was mixed with 1M HCl aq. (3.0 ml) and the solution was stirred for 1 h. Then 6M HCl aq. (0.3 ml) and dioxane (0.3 ml) were added dropwise to the reaction mixture at room temperature. The solution was refluxed for 2 days. The organic layer was removed and the aqueous layer was washed with ether (3 × 10 ml). The solvent was removed under reduced pressure to obtain crude carboxylic acid (377 mg). Thionyl chloride (247 mg, 2.08 mmol) was added dropwise to ethanol (2.0 ml) at -5 °C and stirred for 10 min. To the solution crude carboxylic acid (306 mg) was added and the mixture was stirred at room temperature for 14 h. The solvent and excess thionyl chloride were distilled off under reduced pressure and the residue was washed with ether to obtain *rac*-**10** (245 mg, 1.11 mmol, 68%) as a yellow solid. <sup>1</sup>H NMR (300 MHz, CDCl<sub>3</sub>): δ (ppm) 8.91 (br, 3H), 4.64-4.46 (m, 1H), 4.19 (q, 2H, *J* = 7.2 Hz), 3.11-2.85 (m, 2H), 1.26 (t, 3H, *J* = 7.2 Hz). <sup>19</sup>F NMR (282 MHz, CDCl<sub>3</sub>): δ (ppm) -76.9. IR (KBr): ν (cm<sup>-1</sup>) 3434, 2985, 2609, 1736, 1620, 1525, 1328, 1287, 1203, 1159, 1024, 870.

***N*-octanoyl-3-amino-4,4,4-trifluorobutyric acid ethyl ester (*rac*-11<sub>6</sub>).** Under a nitrogen atmosphere, to a solution of octanoic acid (91.0 mg, 0.559 mmol) in CH<sub>2</sub>Cl<sub>2</sub> (3.0 ml) was added *O*-(Benzotriazol-1-yl)-*N,N,N',N'*-tetramethyluronium hexafluorophosphate (HBTU) (211mg, 0.555 mmol) and the mixture was stirred at 0 °C for 30 min. Then to the mixture were added *rac*-**10** (121 mg, 0.547 mmol) and <sup>i</sup>Pr<sub>2</sub>EtN (366 mg, 2.83 mmol) and the mixture was stirred at room temperature for 3 days. Ethyl acetate was added to the reaction mixture and the organic layer was washed with 1M HCl aq., *sat.* NaHCO<sub>3</sub> aq. and brine. The organic layer was dried over anhydrous Na<sub>2</sub>SO<sub>4</sub> and concentrated under reduced pressure. The residue was purified by silica-gel column chromatography

(eluent; toluene:EtOAc = 7 : 1) to obtain *rac*-**11**6 (124 mg, 0.400 mmol, 74%) as a white solid. Mp. 79.5-80.0 °C. <sup>1</sup>H NMR (300 MHz, CDCl<sub>3</sub>): δ (ppm) 6.36 (d, 1H, *J* = 9.0 Hz), 5.12-4.99 (m, 1H), 4.22-4.14 (m, 2H), 2.78-2.60 (m, 2H), 2.24 (t, 2H, *J* = 6.9 Hz), 1.72-1.55 (m, 2H), 1.35-1.22 (m, 11H), 0.88 (t, 3H, *J* = 6.6 Hz). <sup>19</sup>F NMR (282 MHz, CDCl<sub>3</sub>): δ (ppm) -76.6. IR (KBr): ν (cm<sup>-1</sup>) 3294, 2928, 1736, 1666, 1549, 1421, 1308, 1236, 1121, 1030, 876, 662.

***N*-octanoyl-3-amino-4,4,4-trifluorobutyric acid (*rac*-**16**)**. To the solution of *rac*-**11**6 (56.7 mg, 0.182 mmol) in 1,4-dioxane (1.0 ml) and H<sub>2</sub>O (0.7 ml) was added LiOH·H<sub>2</sub>O (79.1 mg, 1.89 mmol) at room temperature and the solution was stirred for 1 day. Ethyl acetate was added to the reaction mixture and the organic layer was washed with 1M HCl aq. The organic layer was dried over anhydrous Na<sub>2</sub>SO<sub>4</sub> and then concentrated under reduced pressure to obtain *rac*-**16** (50.7 mg, 1.79 mmol, 98%) as a white powder. Mp. 138.1-139.2 °C. <sup>1</sup>H NMR (500 MHz, CD<sub>3</sub>OD): δ (ppm) 5.08-4.95 (m, 1H), 2.79 (dd, 1H, *J*<sub>1</sub> = 16.5 Hz, *J*<sub>2</sub> = 4.0 Hz), 2.60 (dd, 1H, *J*<sub>1</sub> = 16.5 Hz, *J*<sub>2</sub> = 6.5 Hz), 2.21 (t, 2H, *J* = 7.5 Hz), 1.65-1.55 (m, 2H), 1.40-1.25 (m, 8H), 0.90 (t, 3H, *J* = 7.0 Hz). <sup>19</sup>F NMR (282 MHz, CDCl<sub>3</sub>): δ (ppm) -76.9. IR (KBr): ν (cm<sup>-1</sup>) 3354, 2937, 1728, 1627, 1556, 1419, 1302, 1225, 1186, 1122, 639.

The compound (*S*)-**26** was synthesized following the reactions shown in Scheme S3. The intermediate (*S*)-**14** was synthesized according to the literature.<sup>3</sup>

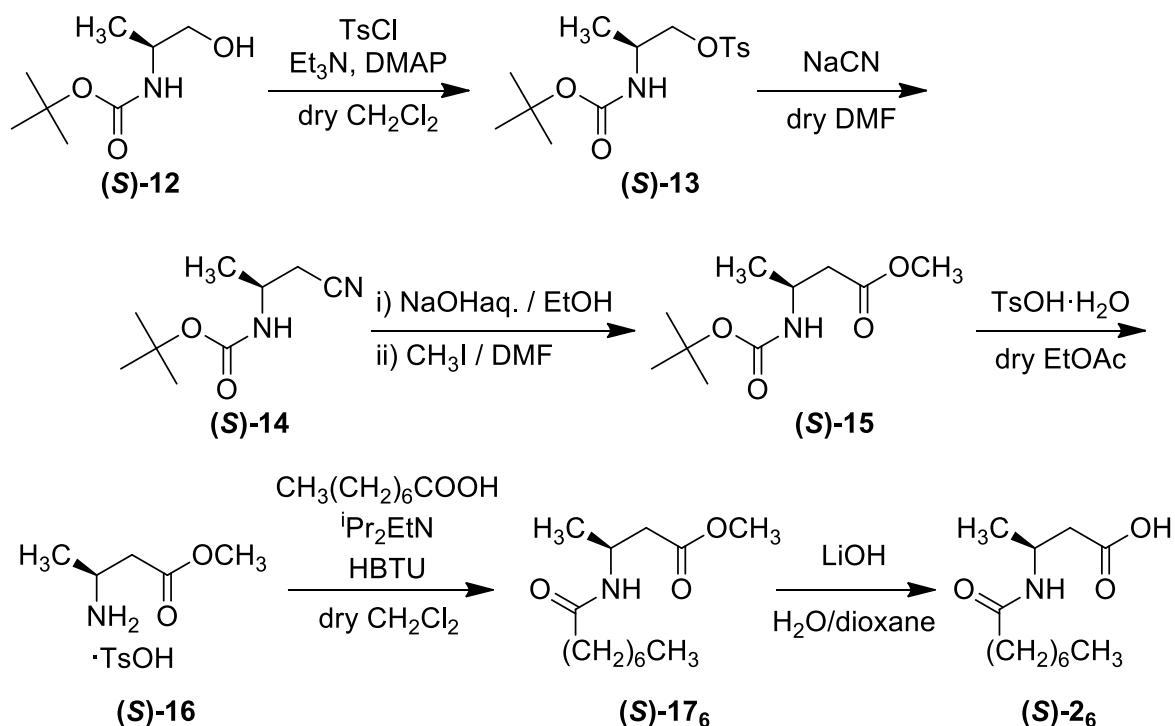

Scheme S3 Synthesis of (*S*)-**26**

**(S)-2-[(*tert*-butoxycarbonyl)amino]propyl *p*-toluenesulfonate ((S)-13).** Under a nitrogen atmosphere, to a solution of *N*-Boc-L-alaninol ((S)-12) (0.602 g, 3.43 mmol) in dry CH<sub>2</sub>Cl<sub>2</sub> (4.0 ml) were added triethylamine (0.525 g, 5.18 mmol), *p*-toluenesulfonyl chloride (0.919 g, 4.82 mmol) and DMAP (0.126 g, 1.03 mmol) at 0 °C and the mixture was stirred at room temperature for 24 h. To the reaction mixture was added *sat.* NaHSO<sub>4</sub> aq. until pH = 2. The aqueous layer was washed with CH<sub>2</sub>Cl<sub>2</sub> (3×10 ml) and the organic layer was dried over anhydrous Na<sub>2</sub>SO<sub>4</sub> and concentrated under reduced pressure. The residue was purified by silica-gel column chromatography (eluent; hexane:EtOAc = 5 : 2) to obtain (S)-13 (0.884 g, 2.68 mmol, 78%) as a white solid. <sup>1</sup>H NMR (500 MHz, CDCl<sub>3</sub>): δ (ppm) 7.79 (d, 2H, *J* = 8.0 Hz), 7.35 (d, 2H, *J* = 8.0 Hz), 4.57 (s, 1H), 4.10-3.80 (m, 3H), 2.37 (s, 3H), 1.40 (s, 9H), 1.15 (d, 3H, *J* = 6.5 Hz). IR (KBr): ν (cm<sup>-1</sup>) 3426, 2968, 1726, 1500, 1349, 1232, 1189, 1162, 1080, 966, 820, 673, 555.

**(S)-3-[(*tert*-butoxycarbonyl)amino]butanenitrile ((S)-14).** Under a nitrogen atmosphere, a solution of sodium cyanide (0.273 g, 5.57 mmol) in dry DMF (1.0 ml) was added dropwise to a solution of (S)-13 (0.603 g, 1.83 mmol) in dry DMF (1.0 ml) and the mixture was stirred at room temperature. After 24 h, H<sub>2</sub>O (10 ml) was added to the reaction mixture. The aqueous layer was washed with CH<sub>2</sub>Cl<sub>2</sub> (3×10 ml). Then the organic layer was washed with *sat.* NaHCO<sub>3</sub> aq. and brine. The organic layer was combined and dried over anhydrous Na<sub>2</sub>SO<sub>4</sub> and concentrated under reduced pressure. The residue was purified by silica-gel column chromatography (eluent; hexane:EtOAc = 4 : 1) to obtain (S)-14 (0.302 g, 1.51 mmol, 83%) as a white solid. <sup>1</sup>H NMR (300 MHz, CDCl<sub>3</sub>): δ (ppm) 4.63 (s, 1H), 4.15-3.88 (m, 1H), 2.75 (dd, 1H, *J*<sub>1</sub> = 16.5 Hz, *J*<sub>2</sub> = 4.8 Hz), 2.53 (dd, 1H, *J*<sub>1</sub> = 16.5 Hz, *J*<sub>2</sub> = 4.2 Hz), 1.45 (s, 9H), 1.33 (d, 3H, *J* = 6.9 Hz). IR (KBr): ν (cm<sup>-1</sup>) 3367, 2988, 1684, 1520, 1365, 1252, 1171, 785, 594.

**(S)-3-[(*tert*-butoxycarbonyl)amino]butyric acid methyl ester ((S)-15).** To the solution of (S)-14 (0.100 g, 0.500 mmol) in EtOH (1.0 ml) was added dropwise to 2M NaOH aq. (1.0 ml) at room temperature and the solution was refluxed at 90 °C for 1 day. The reaction mixture was concentrated under reduced pressure to obtain crude sodium carboxylate as a white powder. To the solution of crude salt in DMF (1.0 ml) was added dropwise iodomethane (57.0 μl, 0.916 mmol) at room temperature and the solution was stirred for 3 days. The remaining solid was filtered off and H<sub>2</sub>O was added to the filtrate. The aqueous layer was washed with EtOAc (20 ml × 3) and the organic layer was dried over anhydrous Na<sub>2</sub>SO<sub>4</sub> and then concentrated under reduced pressure. The residue was purified by silica-gel column chromatography (eluent; hexane:EtOAc = 3 : 1) to obtain (S)-15 (48.0 mg, 0.206 mmol, 41%) as a white solid. <sup>1</sup>H NMR (300 MHz, CDCl<sub>3</sub>): δ (ppm) 4.93 (s, 1H), 4.20-3.95 (m, 1H), 3.69 (s, 3H), 2.58-2.44 (m, 2H), 1.48 (s, 9H), 1.21 (d, 3H, *J* = 6.9 Hz). IR (KBr): ν (cm<sup>-1</sup>) 3375, 2986, 1741, 1685, 1520, 1440, 1369, 1320, 1205, 1161, 1063, 851, 595.

**(S)-3-aminobutyric acid methyl ester *p*-toluenesulfonate ((S)-16).** To ethyl acetate (1.0 ml) were added (S)-15 (52.7 mg, 0.226 mmol) and TsOH·H<sub>2</sub>O (43.6 mg, 0.229 mmol) at room temperature and the solution was stirred at 50 °C for 30 min. The mixture was stirred at room temperature for 1 day and the precipitate was collected by filtration to obtain (S)-16 (52.2 mg, 0.161 mmol, 71%) as a white powder. <sup>1</sup>H NMR (500 MHz, CD<sub>3</sub>OD): δ (ppm) 7.71 (d, 2H, *J* = 8.5 Hz), 7.23 (d, 2H, *J* = 8.5 Hz), 3.74 (s, 3H), 3.74-3.65 (m, 1H), 2.80-2.65 (m, 2H), 2.37 (s, 3H), 1.35-1.32 (m, 3H). IR (KBr): ν (cm<sup>-1</sup>) 3442, 3032, 2953, 1730, 1626, 1597, 1504, 1451, 1390, 1321, 1227, 1162, 1124, 1035, 1011, 818, 681, 568.

***N*-octanoyl-(S)-3-aminobutyric acid methyl ester ((S)-17<sub>6</sub>).** Under a nitrogen atmosphere, to a solution of octanoic acid (91.0 mg, 0.559 mmol) in CH<sub>2</sub>Cl<sub>2</sub> (3.0 ml) were added *O*-(Benzotriazol-1-yl)-*N,N,N',N'*-tetramethyluronium hexafluorophosphate (HBTU) (74.6 mg, 0.197 mmol) and the mixture was stirred at 0 °C for 30 min. Then to the mixture were added (S)-16 (52.2 mg, 0.161 mmol) and <sup>1</sup>Pr<sub>2</sub>EtN (0.104 g, 0.807 mmol) and the mixture was stirred at room temperature for 12 h. Ethyl acetate was added to the reaction mixture and the organic layer was washed with 1M HCl aq., sat. NaHCO<sub>3</sub> aq. and brine. The organic layer was dried over anhydrous Na<sub>2</sub>SO<sub>4</sub> and concentrated under reduced pressure. The residue was purified by silica-gel column chromatography (eluent; hexane:EtOAc = 2 : 1) to obtain (S)-17<sub>6</sub> (25.2 mg, 0.103 mmol, 64%) as a white solid. Mp. 45.5-48.0 °C. <sup>1</sup>H NMR (500 MHz, CDCl<sub>3</sub>): δ (ppm) 6.02 (s, 1H), 4.50-4.30 (m, 1H), 3.69 (s, 3H), 2.59-2.48 (m, 2H), 2.14 (t, 2H, *J* = 7.5 Hz), 1.68-1.58 (m, 2H), 1.37-1.25 (m, 8H), 1.22 (d, 3H, *J* = 7.0 Hz), 0.88 (t, 3H, *J* = 7.0 Hz). <sup>13</sup>C NMR (125 MHz, CDCl<sub>3</sub>): δ (ppm) 172.3, 172.3, 51.6, 41.7, 39.7, 36.9, 31.7, 29.2, 29.0, 25.7, 22.6, 20.0, 14.0. IR (KBr): ν (cm<sup>-1</sup>) 3304, 2926, 1730, 1636, 1550, 1464, 1433, 1377, 1304, 1207, 1144.

***N*-octanoyl-(S)-3-aminobutyric acid ((S)-2<sub>6</sub>).** To the solution of (S)-17<sub>6</sub> (25.2 mg, 0.103 mmol) in 1,4-dioxane (10.0 ml) and H<sub>2</sub>O (8.0 ml) was added LiOH·H<sub>2</sub>O (46.7 mg, 1.11 mmol) at room temperature and the solution was stirred for 1 day. Ethyl acetate was added to the reaction mixture and the organic layer was washed with 1M HCl aq. The organic layer was dried over anhydrous Na<sub>2</sub>SO<sub>4</sub> and then concentrated under reduced pressure to obtain (S)-2<sub>6</sub> (50.7 mg, 1.79 mmol, quant.) as a white powder. Mp. 82.6-84.3 °C. <sup>1</sup>H NMR (500 MHz, CD<sub>3</sub>OD): δ (ppm) 4.28-4.21 (m, 1H), 2.53 (dd, 1H, *J*<sub>1</sub> = 15.5 Hz, *J*<sub>2</sub> = 6.5 Hz), 2.38 (dd, 1H, *J*<sub>1</sub> = 15.0 Hz, *J*<sub>2</sub> = 7.0 Hz), 2.14 (t, 2H, *J* = 7.5 Hz), 1.65-1.55 (m, 2H), 1.39-1.25 (m, 8H), 1.18 (d, 3H, *J* = 6.5 Hz), 0.90 (t, 3H, *J* = 6.5 Hz). <sup>13</sup>C NMR (125 MHz, CDCl<sub>3</sub>): δ (ppm) 175.3, 173.1, 41.9, 39.9, 36.9, 31.6, 29.2, 29.0, 25.7, 22.6, 20.0, 14.0. IR (KBr): ν (cm<sup>-1</sup>) 3316, 2923, 1739, 1645, 1540, 1469, 1392, 1249, 1206, 696.

The compound *rac*-2<sub>6</sub> was synthesized following the reactions shown in Scheme S4.

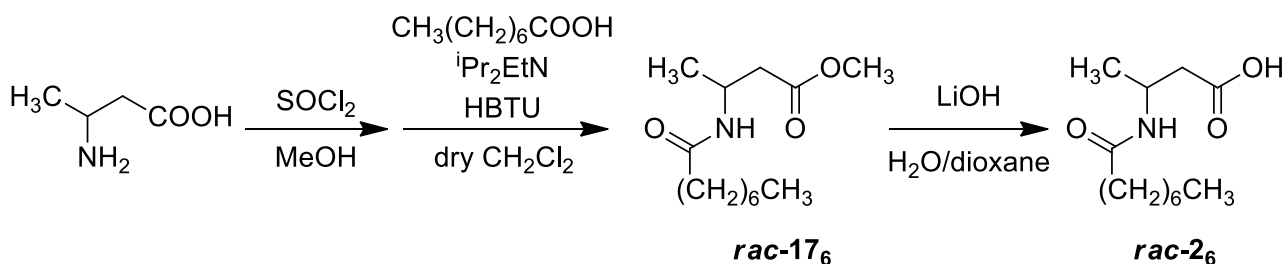

Scheme S4 Synthesis of *rac-26*

***N*-octanoyl-*rac*-3-aminobutyric acid methyl ester (*rac-176*).** Thionyl chloride (425  $\mu$ l, 5.86 mmol) was added dropwise to methanol (7.0 ml) at  $-5$   $^{\circ}$ C and stirred for 10 min. *Rac*-3-aminobutyric acid (0.500 g, 4.85 mmol) was added and the mixture was stirred at room temperature for 12 h. The solvent and excess thionyl chloride were distilled off under reduced pressure and the residue was washed with ether to obtain crude ester (0.740 g) as a colorless liquid. Under a nitrogen atmosphere, to a solution of octanoic acid (192 mg, 1.18 mmol) in  $\text{CH}_2\text{Cl}_2$  (6.0 ml) was added *O*-(Benzotriazol-1-yl)-*N,N,N',N'*-tetramethyluronium hexafluorophosphate (HBTU) (451 mg, 1.19 mmol) and the mixture was stirred at  $0$   $^{\circ}$ C for 30 min. Then to the mixture were added crude ester (202 mg) and  $i\text{Pr}_2\text{EtN}$  (759 mg, 5.87 mmol) and the mixture was stirred at room temperature for 12 h. Ethyl acetate was added to the reaction mixture and the organic layer was washed with 1M HCl aq., sat.  $\text{NaHCO}_3$  aq. and brine. The organic layer was dried over anhydrous  $\text{Na}_2\text{SO}_4$  and concentrated under reduced pressure. The residue was purified by silica-gel column chromatography (eluent; toluene:EtOAc = 7 : 1) to obtain *rac-176* (238 mg, 0.979 mmol, 74%) as a white solid. Mp. 44.1-46.8  $^{\circ}$ C.  $^1\text{H}$  NMR (500 MHz,  $\text{CDCl}_3$ ):  $\delta$  (ppm) 6.02 (s, 1H), 4.42-4.30 (m, 1H), 3.69 (s, 3H), 2.58-2.47 (m, 2H), 2.14 (t, 2H,  $J = 7.5$  Hz), 1.65-1.53 (m, 2H), 1.32-1.23 (m, 11H), 1.22 (d, 3H,  $J = 7.0$  Hz), 0.88 (t, 3H,  $J = 7.0$  Hz).  $^{13}\text{C}$  NMR (125 MHz,  $\text{CDCl}_3$ ):  $\delta$  (ppm) 172.3, 172.2, 51.6, 41.7, 39.7, 36.9, 31.7, 29.2, 29.0, 25.7, 22.6, 20.0, 14.0. IR (KBr):  $\nu$  ( $\text{cm}^{-1}$ ) 3303, 2927, 2854, 1744, 1637, 1544, 1436, 1378, 1308, 1207, 1149, 999, 889, 723.

***N*-octanoyl-*rac*-3-aminobutyric acid (*rac-26*).** To the solution of *rac-176* (85.5 mg, 0.351 mmol) in 1,4-dioxane (2.0 ml) and  $\text{H}_2\text{O}$  (1.4 ml) was added  $\text{LiOH}\cdot\text{H}_2\text{O}$  (154 mg, 3.66 mmol) at room temperature and the solution was stirred for 6 h. Ethyl acetate was added to the reaction mixture and the organic layer was washed with 1M HCl aq. The organic layer was dried over anhydrous  $\text{Na}_2\text{SO}_4$  and then concentrated under reduced pressure to obtain *rac-26* (80.7 mg, quant.) as a white powder. Mp. 78.1-80.0  $^{\circ}$ C.  $^1\text{H}$  NMR (500 MHz,  $\text{CD}_3\text{OD}$ ):  $\delta$  (ppm) 7.89 (d, 1H,  $J = 3.9$  Hz), 4.30-4.20 (m, 1H), 2.51 (dd, 1H,  $J_1 = 15.5$  Hz,  $J_2 = 6.5$  Hz), 2.38 (dd, 1H,  $J_1 = 15.5$  Hz,  $J_2 = 7.0$  Hz), 2.14 (t, 2H,  $J = 7.5$  Hz), 1.65-1.55 (m, 2H), 1.40-1.30 (m, 8H), 1.18 (d, 3H,  $J = 6.5$  Hz), 0.91 (t, 3H,  $J = 6.5$  Hz).  $^{13}\text{C}$  NMR (125 MHz,  $\text{CDCl}_3$ ):  $\delta$  (ppm) 175.5, 173.3, 41.9, 39.8, 36.8, 31.6, 29.1, 28.9, 25.7, 22.6, 20.0, 14.0. IR (KBr):  $\nu$  ( $\text{cm}^{-1}$ ) 3296, 2931, 1703, 1645, 1551, 1405, 1241, 926.

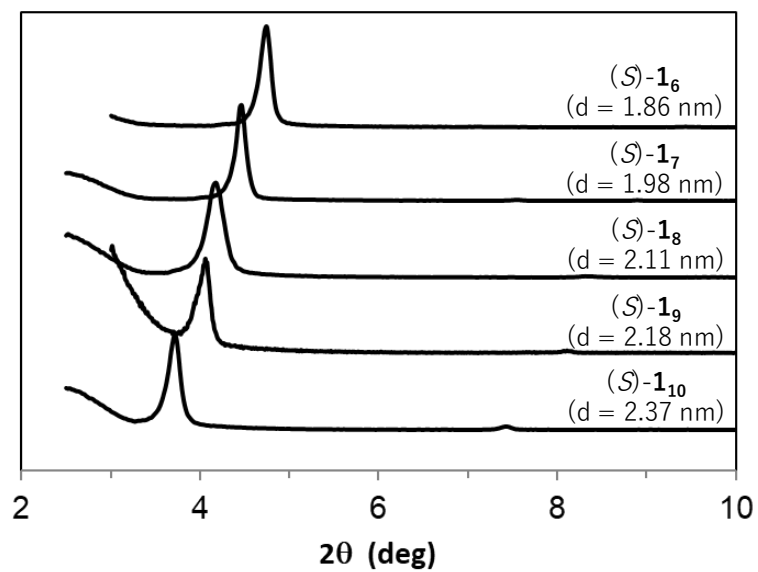

Figure S1. XRD patterns of the xerogels (S)-1<sub>n</sub> (n = 6-10).



Table S1. Summary of crystallographic data.

|                                                                   | <b>C<sub>6</sub>-β-Ala (needle-like)</b>        | <b>C<sub>6</sub>-β-Ala (plate-like)</b>         | <b>rac-1<sub>6</sub></b>                         |
|-------------------------------------------------------------------|-------------------------------------------------|-------------------------------------------------|--------------------------------------------------|
| empirical formula                                                 | C <sub>11</sub> H <sub>21</sub> NO <sub>3</sub> | C <sub>11</sub> H <sub>21</sub> NO <sub>3</sub> | C <sub>12</sub> H <sub>20</sub> FNO <sub>3</sub> |
| formula weight                                                    | 215.29                                          | 215.29                                          | 283.29                                           |
| temperature (K)                                                   | 150                                             | 100                                             | 100                                              |
| crystal size (mm)                                                 | 0.33 × 0.08 × 0.03                              | 0.17 × 0.14 × 0.01                              | 0.33 × 0.05 × 0.02                               |
| crystal system                                                    | monoclinic                                      | monoclinic                                      | monoclinic                                       |
| space group                                                       | <i>P2<sub>1</sub>/c</i>                         | <i>P2<sub>1</sub></i>                           | <i>P2<sub>1</sub>/n</i>                          |
| <i>a</i> (Å)                                                      | 26.831(6)                                       | 5.288(3)                                        | 14.394(2)                                        |
| <i>b</i> (Å)                                                      | 4.8360(10)                                      | 7.448(5)                                        | 13.015(2)                                        |
| <i>c</i> (Å)                                                      | 9.328(2)                                        | 30.857(19)                                      | 22.744(4)                                        |
| <i>α</i> (°)                                                      | 90                                              | 90                                              | 90                                               |
| <i>β</i> (°)                                                      | 98.963(3)                                       | 92.940(7)                                       | 94.508(2)                                        |
| <i>γ</i> (°)                                                      | 90                                              | 90                                              | 90                                               |
| <i>V</i> (Å <sup>3</sup> )                                        | 1195.5(4)                                       | 1213.7(13)                                      | 4247.7(12)                                       |
| <i>Z</i>                                                          | 4                                               | 4                                               | 12                                               |
| <i>D<sub>c</sub></i> (g/cm <sup>3</sup> )                         | 1.196                                           | 1.178                                           | 1.329                                            |
| <i>μ</i> (MoK <sub>α</sub> ) (mm <sup>-1</sup> )                  | 0.086                                           | 0.085                                           | 0.119                                            |
| <i>θ</i> <sub>min/max</sub> (°)                                   | 1.537/24.996                                    | 1.322/27.474                                    | 1.619/24.998                                     |
| <i>R</i> 1 [ <i>F</i> <sub>o</sub> > 2σ( <i>F</i> <sub>o</sub> )] | 0.0465                                          | 0.0791                                          | 0.0538                                           |
| <i>wR</i> 2 (all <i>F</i> <sub>o</sub> <sup>2</sup> )             | 0.1241                                          | 0.1206                                          | 0.1384                                           |
| GOF                                                               | 1.009                                           | 0.890                                           | 0.961                                            |
| measured reflns                                                   | 5245                                            | 6722                                            | 19960                                            |
| independent reflns                                                | 2084                                            | 4270                                            | 7450                                             |
| observed reflns                                                   | 1618                                            | 1702                                            | 5455                                             |
| reflns used                                                       | 2084                                            | 4270                                            | 7450                                             |
| parameters                                                        | 145                                             | 279                                             | 532                                              |
| CCDC number                                                       | 1865320                                         | 1865321                                         | 1865322                                          |

## References

- 1) Ishida, Y.; Iwahashi, N.; Nishizono, N.; Saigo, K. *Tetrahedron Lett.* **2009**, *50*, 1889.
- 2) Soloshonok, V. A.; Kukhar, V. P. *Tetrahedron* **1996**, *52*, 6953.
- 3) Sutherland, A.; Willis, C. L. *J. Org. Chem.* **1998**, *63*, 7764.

1H

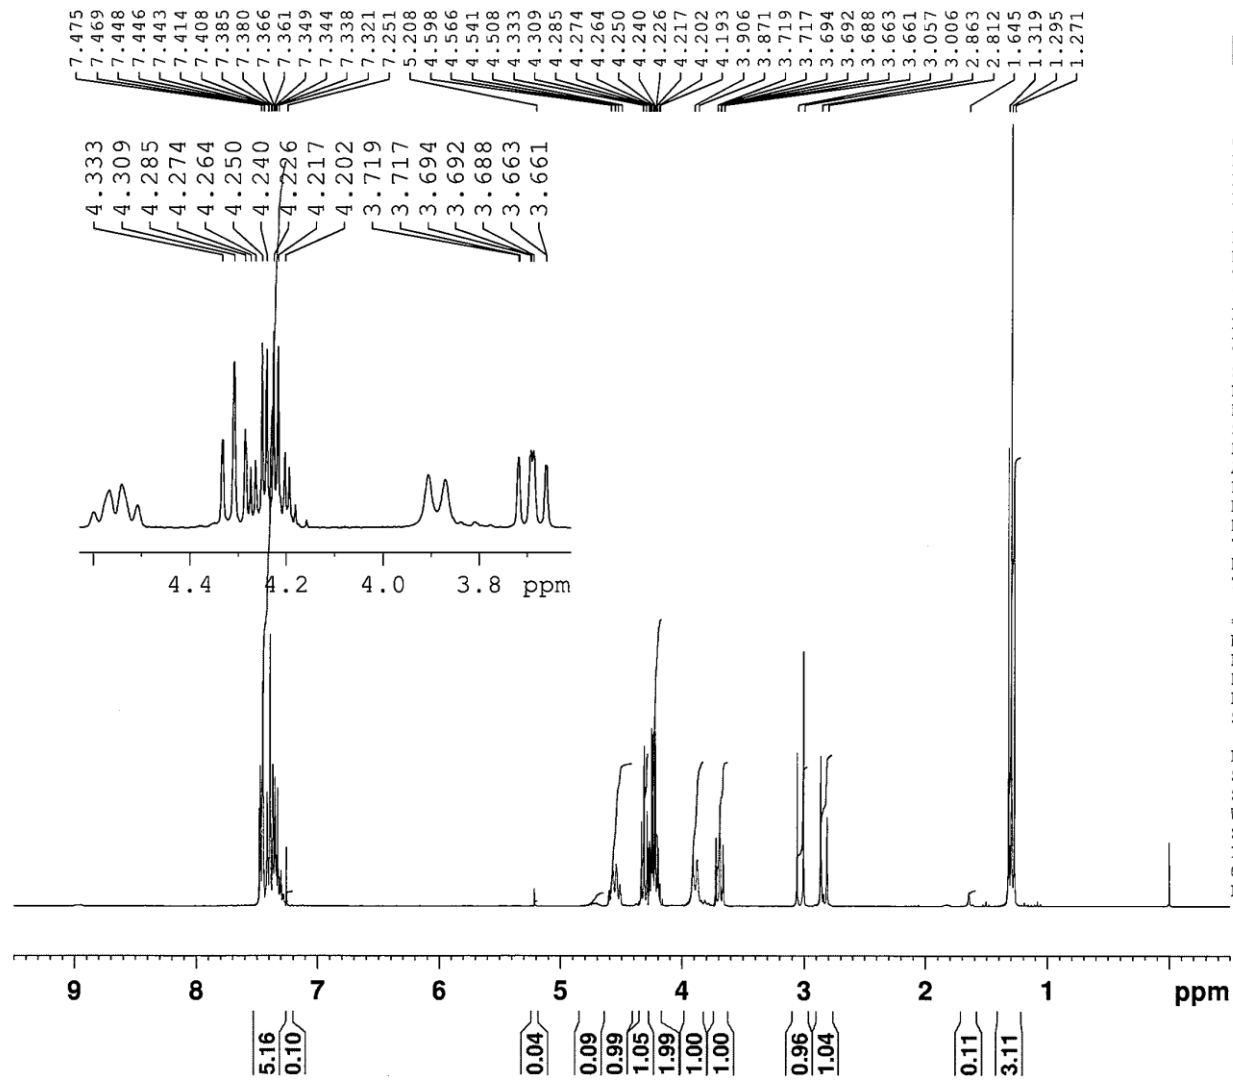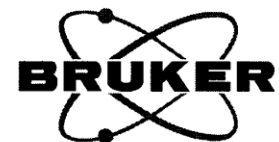

Current Data Parameters  
 NAME A12ta020rk  
 EXPNO 15102701  
 PROCNO 1

F2 - Acquisition Parameters  
 Date\_ 20151027  
 Time 16.26  
 INSTRUM spect  
 PROBHD 5 mm PABBO BB-  
 PULPROG zg30  
 TD 65536  
 SOLVENT CDCl3  
 NS 8  
 DS 2  
 SWH 6188.119 Hz  
 FIDRES 0.094423 Hz  
 AQ 5.2953587 sec  
 RG 64  
 DW 80.800 usec  
 DE 6.50 usec  
 TE 296.5 K  
 D1 1.00000000 sec  
 TD0 1

----- CHANNEL f1 -----  
 NUC1 1H  
 P1 15.00 usec  
 PL1 1.20 dB  
 PL1W 8.19348145 W  
 SFO1 300.1318534 MHz

F2 - Processing parameters  
 SI 32768  
 SF 300.1300084 MHz  
 WDW EM  
 SSB 0  
 LB 0.30 Hz  
 GB 0  
 PC 1.00

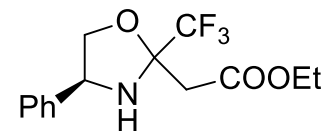

(S)-3

- ACCEPTANCE - System: AV300 OrderNo.: JH033009 Customer: Saitama University Engineer: IKD  
 P/N Console: Z108356/162 Shim system: BOSS I original dataset: 104275\_0150snf 3 1  
 Probe: 5 mm PABBO BB-1H/D Z-GRD Z104275/0150 Sample depth:20 Gas: air  
 Sensitivity test for 19F (additional test); Sample: 0,05% TFT in CDC13 (P/N: Z10234)  
 Sino= 243:1 ( signal= -61 - -65 ppm noise= -59.08 - -60.08 ppm [1 ppm] noise range= 4.5 ppm )  
 P1= 15usec PL1= -0.3dB

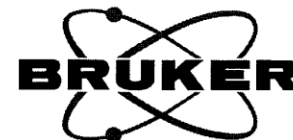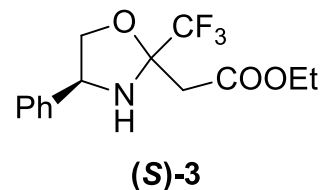

83.683

Current Data Parameters  
 NAME A12TA020rk  
 EXPNO 16030102  
 PROCNO 1

F2 - Acquisition Parameters  
 Date\_ 20160301  
 Time 14.23  
 INSTRUM spect  
 PROBHD 5 mm PABBO BB-  
 PULPROG zgfhigqn  
 TD 32768  
 SOLVENT CDC13  
 NS 1  
 DS 0  
 SWH 12019.230 Hz  
 FIDRES 0.366798 Hz  
 AQ 1.3631988 sec  
 RG 203  
 DW 41.600 usec  
 DE 6.50 usec  
 TE 297.7 K  
 D1 10.00000000 sec  
 D11 0.03000000 sec  
 D12 0.00002000 sec  
 TD0 1

==== CHANNEL f1 =====  
 NUC1 19F  
 P1 15.00 usec  
 PL1 -0.30 dB  
 PL1W 10.09325600 W  
 SFO1 282.3865635 MHz

==== CHANNEL f2 =====  
 CPDPRG2 waltz16  
 NUC2 1H  
 PCPD2 80.00 usec  
 PL2 0.58 dB  
 PL12 16.50 dB  
 PL2W 9.45079708 W  
 PL12W 0.24180678 W  
 SFO2 300.1300000 MHz

F2 - Processing parameters  
 SI 16384  
 SF 282.4046312 MHz  
 WDW EM  
 SSB 0  
 LB 2.00 Hz  
 GB 0  
 PC 1.00

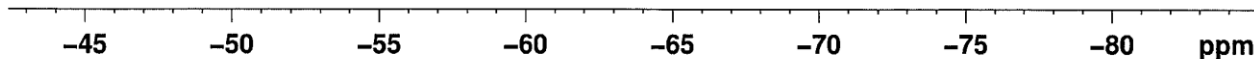

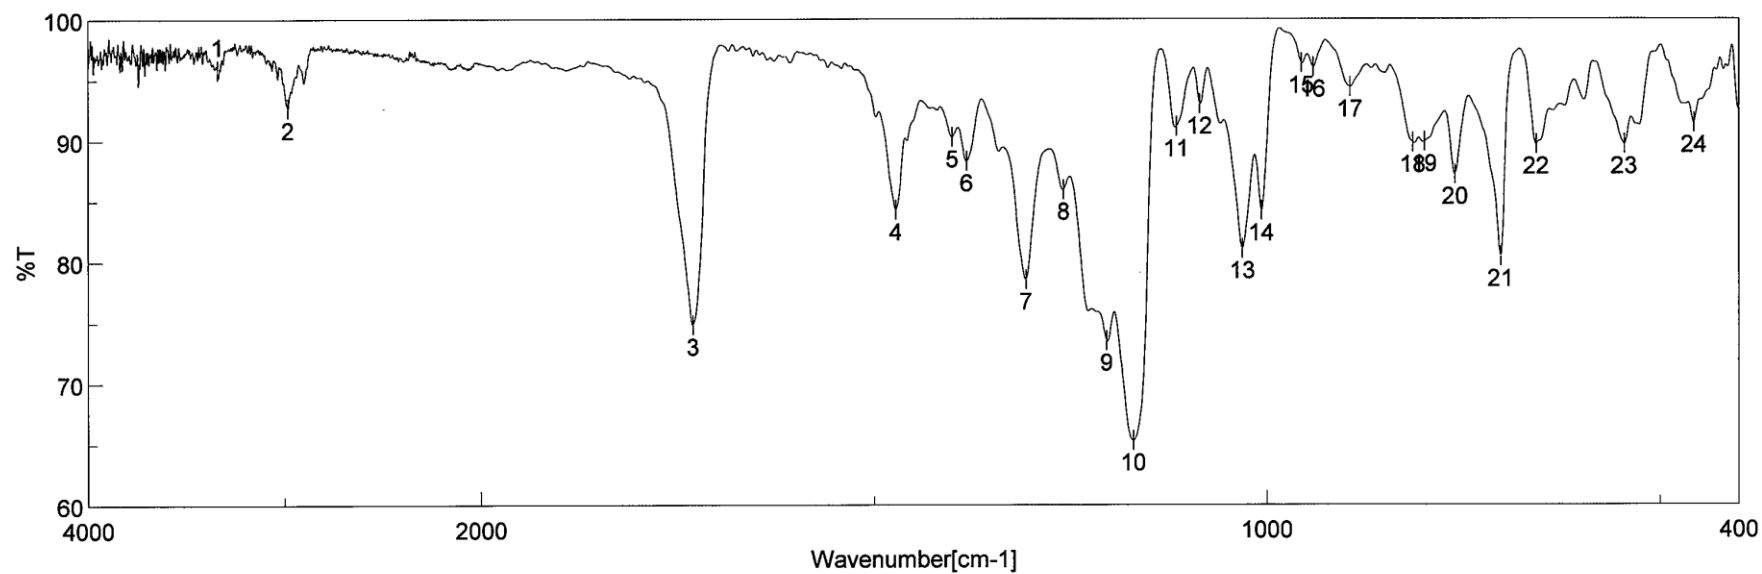

積算回数 16  
 ゼロフィリング ON  
 ゲイン 16  
 測定日時 2016/02/28 16:06  
 測定者 kawamata  
 ファイル名 Memory#2  
 サンプル名 (S)-6  
 コメント

分解 4 cm-1  
 アポダイゼーション Cosine  
 スキャンスピード 2 mm/sec  
 更新日時 2016/02/28 16:09

|              |       |              |       |              |       |              |       |
|--------------|-------|--------------|-------|--------------|-------|--------------|-------|
| 1: 3343.96,  | 95.86 | 2: 2983.34,  | 92.71 | 3: 1730.80,  | 74.85 | 4: 1472.38,  | 84.32 |
| 5: 1400.07,  | 90.30 | 6: 1381.75,  | 88.32 | 7: 1306.54,  | 78.57 | 8: 1258.32,  | 85.97 |
| 9: 1203.36,  | 73.56 | 10: 1169.62, | 65.33 | 11: 1114.65, | 91.17 | 12: 1084.76, | 93.03 |
| 13: 1030.77, | 81.13 | 14: 1006.66, | 84.23 | 15: 955.56,  | 96.39 | 16: 941.09,  | 96.08 |
| 17: 893.84,  | 94.43 | 18: 813.81,  | 89.86 | 19: 799.35,  | 89.92 | 20: 759.82,  | 87.24 |
| 21: 701.96,  | 80.46 | 22: 656.64,  | 89.72 | 23: 545.76,  | 89.72 | 24: 457.05,  | 91.48 |

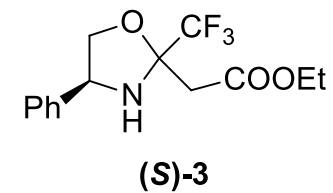

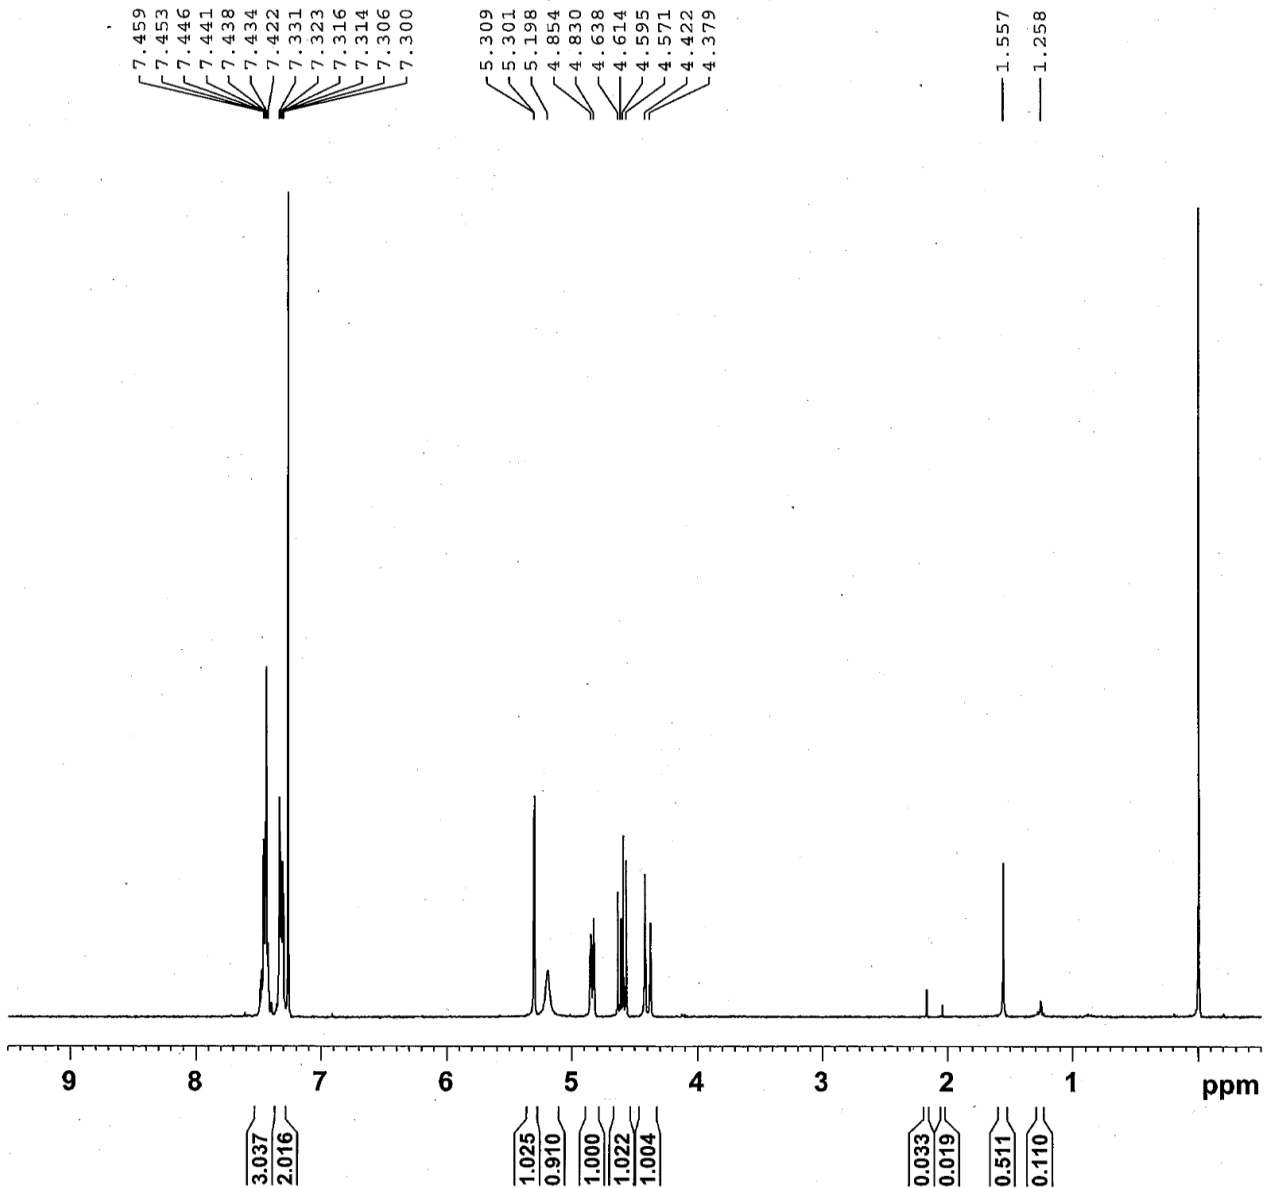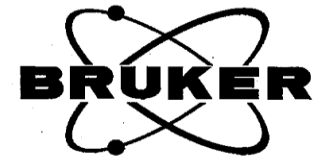

NAME A12ta020rk  
 EXPNO 16011204  
 PROCNO 1  
 Date\_ 20160112  
 Time 12.03  
 INSTRUM spect  
 PROBHD 5 mm PABBO BB-  
 PULPROG zg30  
 TD 65536  
 SOLVENT CDCl3  
 NS 8  
 DS 2  
 SWH 6188.119 Hz  
 FIDRES 0.094423 Hz  
 AQ 5.2953587 sec  
 RG 203  
 DW 80.800 usec  
 DE 6.50 usec  
 TE 297.0 K  
 D1 1.00000000 sec  
 TD0 1

===== CHANNEL f1 =====  
 NUC1 1H  
 P1 15.00 usec  
 PL1 1.20 dB  
 PL1W 8.19348145 W  
 SFO1 300.1318534 MHz  
 SI 32768  
 SF 300.1300056 MHz  
 WDW EM  
 SSB 0  
 LB 0.30 Hz  
 GB 0  
 PC 1.00

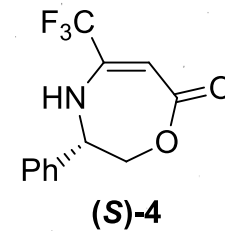

- ACCEPTANCE - System: AV300 OrderNo.: JH033009 Customer: Saitama University Engineer: IKD  
 P/N Console: Z108356/162 Shim system: BOSS I original dataset: 104275\_0150snf 3 1  
 Probe: 5 mm PABBO BB-1H/D Z-GRD Z104275/0150 Sample depth:20 Gas: air  
 Sensitivity test for 19F (additional test); Sample: 0,05% TFT in CDC13 (P/N: Z10234)

Sino= 243:1 ( signal= -61 - -65 ppm noise= -59.08 - -60.08 ppm [1 ppm] noise range= 4.5 ppm )  
 P1= 15usec PL1= -0.3dB

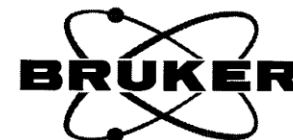

Current Data Parameters  
 NAME A12ta020rk  
 EXPNO 16011202  
 PROCNO 1

F2 - Acquisition Parameters  
 Date\_ 20160112  
 Time\_ 11.57  
 INSTRUM spect  
 PROBHD 5 mm PABBO BB-  
 PULPROG zgfhigqn  
 TD 32768  
 SOLVENT CDC13  
 NS 2  
 DS 0  
 SWH 12019.230 Hz  
 FIDRES 0.366798 Hz  
 AQ 1.3631988 sec  
 RG 203  
 DW 41.600 usec  
 DE 6.50 usec  
 TE 297.3 K  
 D1 10.00000000 sec  
 D11 0.03000000 sec  
 D12 0.00002000 sec  
 TD0 1

===== CHANNEL f1 =====  
 NUC1 19F  
 P1 15.00 usec  
 PL1 -0.30 dB  
 PL1W 10.09325600 W  
 SFO1 282.3865635 MHz

===== CHANNEL f2 =====  
 CPDPRG2 waltz16  
 NUC2 1H  
 PCPD2 80.00 usec  
 PL2 0.58 dB  
 PL12 16.50 dB  
 PL2W 9.45079708 W  
 PL12W 0.24180678 W  
 SFO2 300.1300000 MHz

F2 - Processing parameters  
 SI 16384  
 SF 282.4046280 MHz  
 WDW EM  
 SSB 0  
 LB 2.00 Hz  
 GB 0  
 PC 1.00

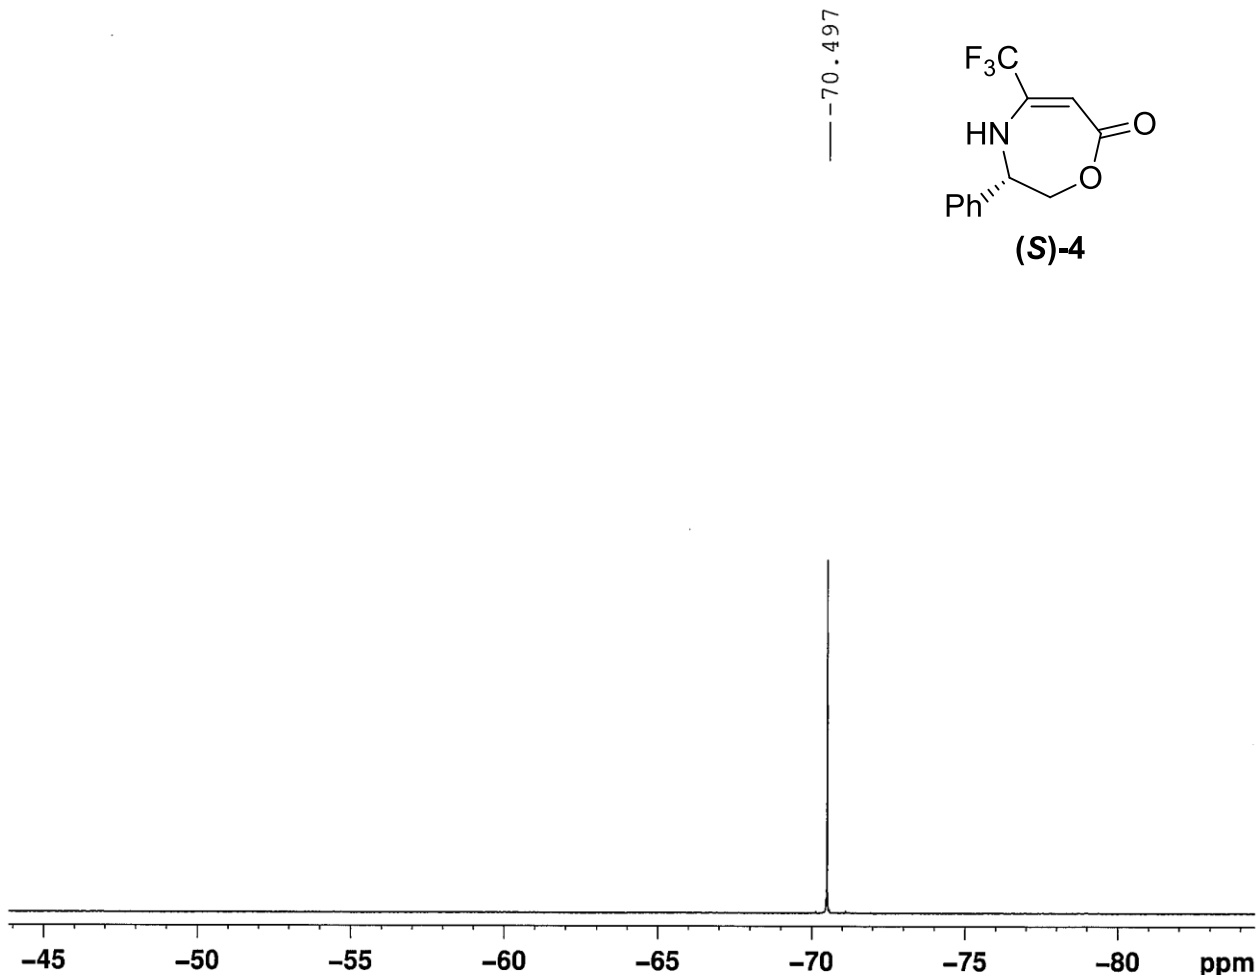

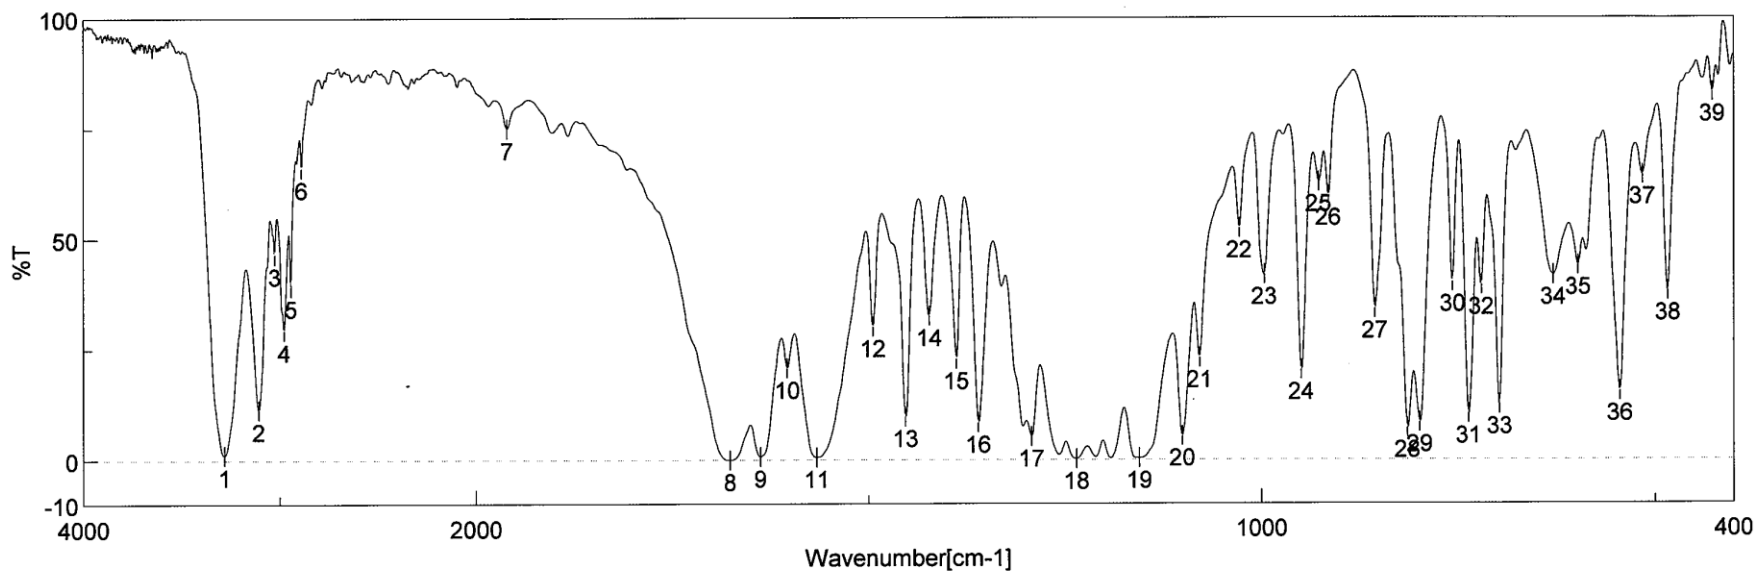

積算回数  
ゼロフィリング  
ゲイン  
測定日時  
測定者  
ファイル名  
サンプル名  
コメント

16  
ON  
16  
2016/02/28 15:12  
kawamata  
Memory#2  
enamine (S)-7

分解  
アポダイゼーション  
スキャンスピード  
更新日時

4 cm-1  
Cosine  
2 mm/sec  
2016/02/28 15:12

|     |          |       |     |          |       |     |          |       |     |          |       |
|-----|----------|-------|-----|----------|-------|-----|----------|-------|-----|----------|-------|
| 1:  | 3282.25, | 1.12  | 2:  | 3106.76, | 11.44 | 3:  | 3026.73, | 46.58 | 4:  | 2978.52, | 29.42 |
| 5:  | 2943.80, | 39.26 | 6:  | 2888.84, | 66.14 | 7:  | 1960.29, | 75.02 | 8:  | 1676.80, | -0.05 |
| 9:  | 1638.23, | 0.76  | 10: | 1603.52, | 20.77 | 11: | 1565.92, | 0.59  | 12: | 1494.56, | 30.13 |
| 13: | 1453.10, | 9.79  | 14: | 1423.21, | 32.58 | 15: | 1388.50, | 22.84 | 16: | 1360.53, | 8.48  |
| 17: | 1293.04, | 5.24  | 18: | 1236.15, | 0.25  | 19: | 1156.12, | 0.38  | 20: | 1101.15, | 5.45  |
| 21: | 1078.98, | 23.14 | 22: | 1027.87, | 52.44 | 23: | 996.05,  | 41.92 | 24: | 948.81,  | 20.40 |
| 25: | 926.63,  | 62.88 | 26: | 914.09,  | 59.81 | 27: | 855.28,  | 34.25 | 28: | 813.81,  | 7.23  |
| 29: | 798.39,  | 8.52  | 30: | 756.92,  | 40.24 | 31: | 736.67,  | 10.45 | 32: | 720.28,  | 39.55 |
| 33: | 697.14,  | 12.53 | 34: | 628.68,  | 41.76 | 35: | 596.86,  | 44.02 | 36: | 543.83,  | 15.49 |
| 37: | 515.86,  | 64.48 | 38: | 484.05,  | 38.21 | 39: | 427.16,  | 83.22 |     |          |       |

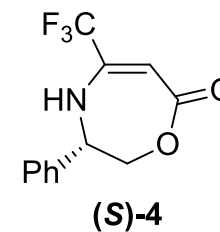



1H

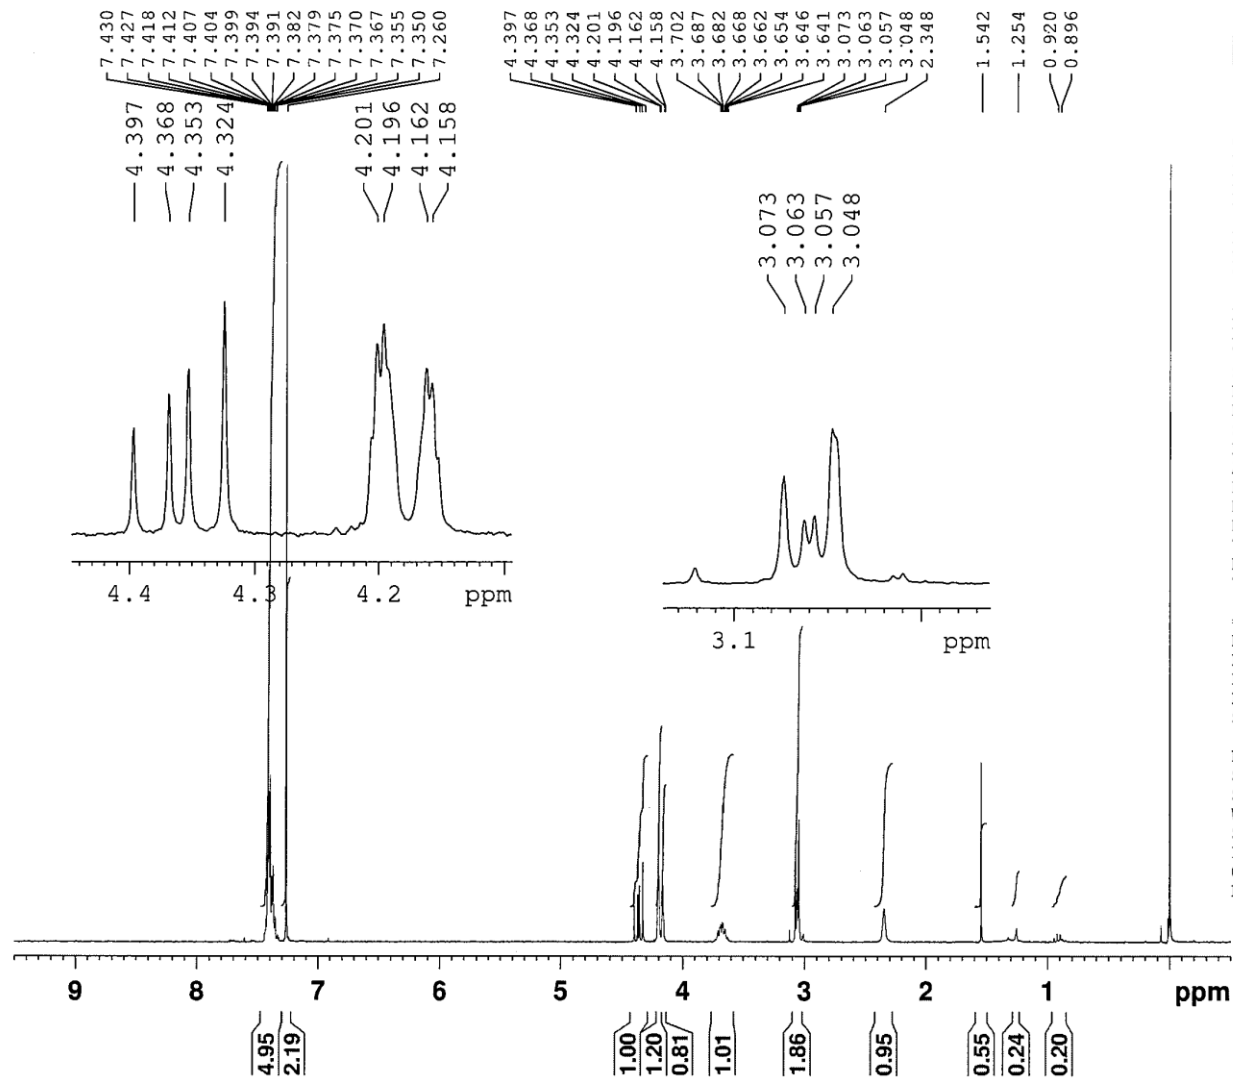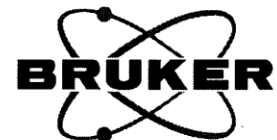

Current Data Parameters  
NAME A12ta020rk  
EXPNO 15100901  
PROCNO 1

F2 - Acquisition Parameters  
Date\_ 20151009  
Time 13.18  
INSTRUM spect  
PROBHD 5 mm PABBO BB-  
PULPROG zg30  
TD 65536  
SOLVENT CDC13  
NS 8  
DS 2  
SWH 6188.119 Hz  
FIDRES 0.094423 Hz  
AQ 5.2953587 sec  
RG 203  
DW 80.800 usec  
DE 6.50 usec  
TE 296.8 K  
D1 1.00000000 sec  
TD0 1

==== CHANNEL f1 =====  
NUC1 1H  
P1 15.00 usec  
PL1 1.20 dB  
PL1W 8.19348145 W  
SFO1 300.1318534 MHz

F2 - Processing parameters  
SI 32768  
SF 300.1300057 MHz  
WDW EM  
SSB 0  
LB 0.30 Hz  
GB 0  
PC 1.00

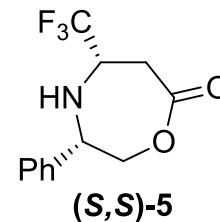

- ACCEPTANCE - System: AV300 OrderNo.: JH033009 Customer: Saitama University Engineer: IKD  
 P/N Console: Z108356/162 Shim system: BOSS I original dataset: 104275\_0150snf 3 1  
 Probe: 5 mm PABBO BB-1H/D Z-GRD Z104275/0150 Sample depth:20 Gas: air  
 Sensitivity test for 19F (additional test); Sample: 0,05% TFT in CDC13 (P/N: Z10234)  
 Sino= 243:1 ( signal= -61 - -65 ppm noise= -59.08 - -60.08 ppm [1 ppm] noise range= 4.5 ppm )  
 P1= 15usec PL1= -0.3dB

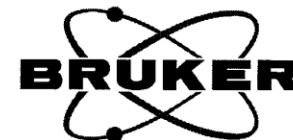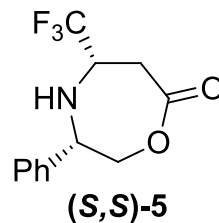

---78.653

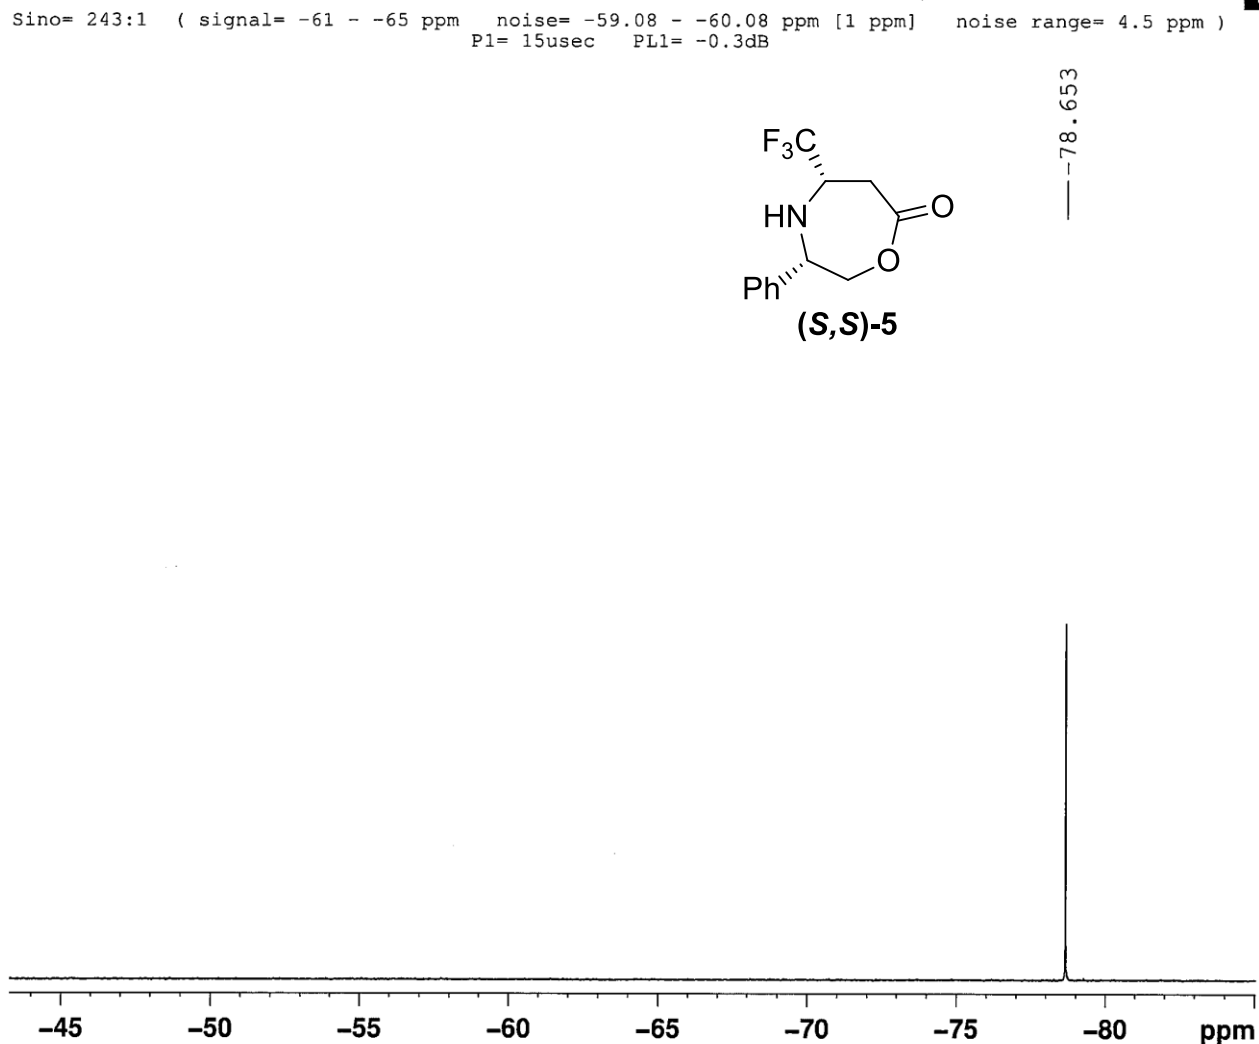

Current Data Parameters  
 NAME A12ta020rk  
 EXPNO 15100904  
 PROCNO 1

F2 - Acquisition Parameters  
 Date\_ 20151009  
 Time 14.48  
 INSTRUM spect  
 PROBHD 5 mm PABBO BB-  
 PULPROG zgfhigqn  
 TD 32768  
 SOLVENT CDC13  
 NS 8  
 DS 0  
 SWH 12019.230 Hz  
 FIDRES 0.366798 Hz  
 AQ 1.3631988 sec  
 RG 203  
 DW 41.600 usec  
 DE 6.50 usec  
 TE 296.7 K  
 D1 10.00000000 sec  
 D11 0.03000000 sec  
 D12 0.00002000 sec  
 TD0 1

==== CHANNEL f1 =====  
 NUC1 19F  
 P1 15.00 usec  
 PL1 -0.30 dB  
 PL1W 10.09325600 W  
 SFO1 282.3865635 MHz

==== CHANNEL f2 =====  
 CPDPRG2 waltz16  
 NUC2 1H  
 PCPD2 80.00 usec  
 PL2 0.58 dB  
 PL12 16.50 dB  
 PL2W 9.45079708 W  
 PL12W 0.24180678 W  
 SFO2 300.1300000 MHz

F2 - Processing parameters  
 SI 16384  
 SF 282.4046357 MHz  
 WDW EM  
 SSB 0  
 LB 2.00 Hz  
 GB 0  
 PC 1.00

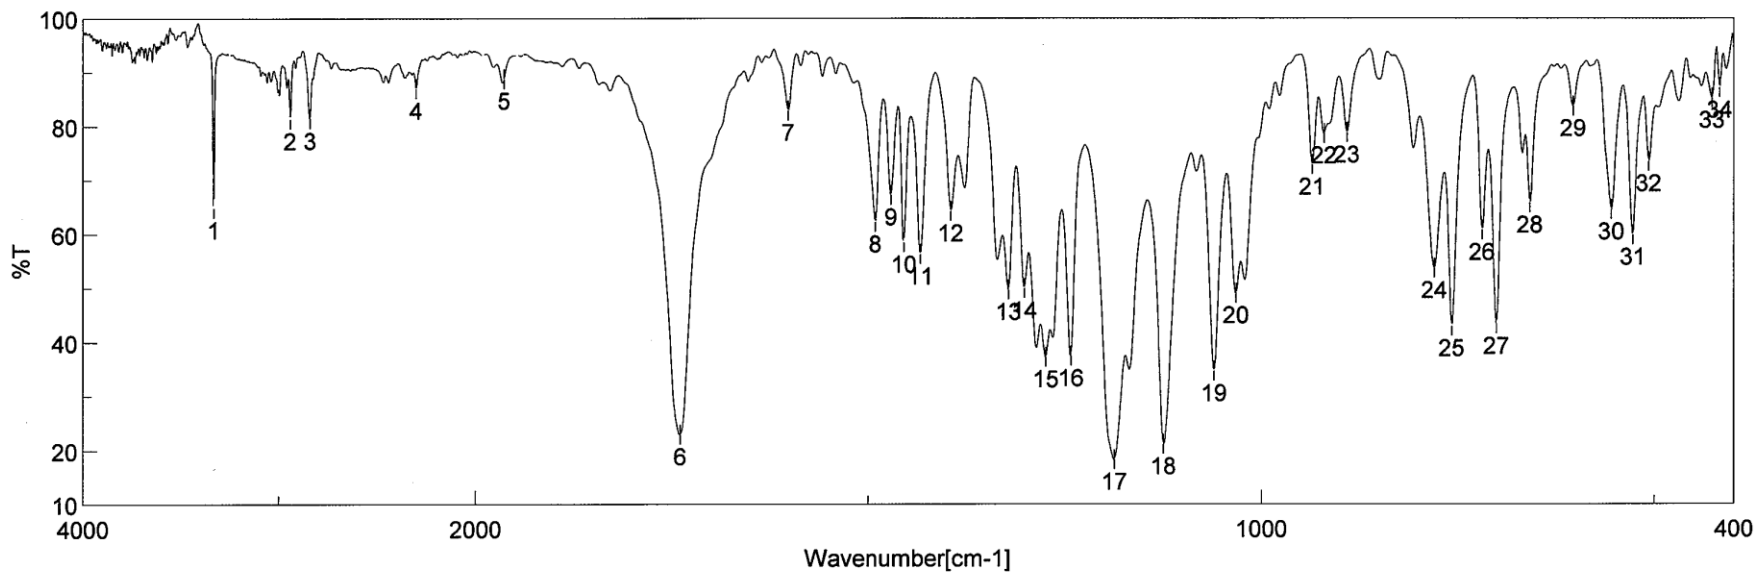

積算回数 16  
 ゼロフィリング ON  
 ゲイン 8  
 測定日時 2016/02/28 15:23  
 測定者 kawamata  
 ファイル名 Memory#2  
 サンプル名 lactone (3S, 5S)-8  
 コメント

分解 4 cm-1  
 アポダイゼーション Cosine  
 スキャンスピード 2 mm/sec  
 更新日時 2016/02/28 15:24

|     |          |       |     |          |       |     |          |       |     |          |       |
|-----|----------|-------|-----|----------|-------|-----|----------|-------|-----|----------|-------|
| 1:  | 3332.39, | 64.87 | 2:  | 2941.88, | 81.41 | 3:  | 2841.60, | 81.46 | 4:  | 2300.66, | 87.07 |
| 5:  | 1963.18, | 88.86 | 6:  | 1739.48, | 22.95 | 7:  | 1601.59, | 82.98 | 8:  | 1490.70, | 62.31 |
| 9:  | 1470.46, | 67.31 | 10: | 1454.06, | 58.54 | 11: | 1432.85, | 56.32 | 12: | 1394.28, | 64.34 |
| 13: | 1321.00, | 49.77 | 14: | 1300.75, | 50.00 | 15: | 1273.75, | 37.25 | 16: | 1241.93, | 37.49 |
| 17: | 1186.97, | 18.29 | 18: | 1124.30, | 21.18 | 19: | 1059.69, | 34.70 | 20: | 1031.73, | 49.12 |
| 21: | 935.31,  | 72.92 | 22: | 919.88,  | 78.76 | 23: | 890.95,  | 78.92 | 24: | 779.10,  | 53.76 |
| 25: | 756.92,  | 42.99 | 26: | 718.35,  | 60.83 | 27: | 700.03,  | 43.42 | 28: | 657.61,  | 65.88 |
| 29: | 602.65,  | 83.82 | 30: | 554.43,  | 64.64 | 31: | 527.44,  | 59.93 | 32: | 507.19,  | 73.57 |
| 33: | 428.12,  | 85.33 | 34: | 418.48,  | 87.20 |     |          |       |     |          |       |

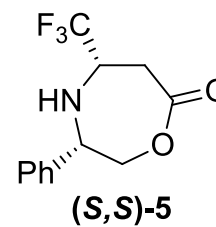

1H

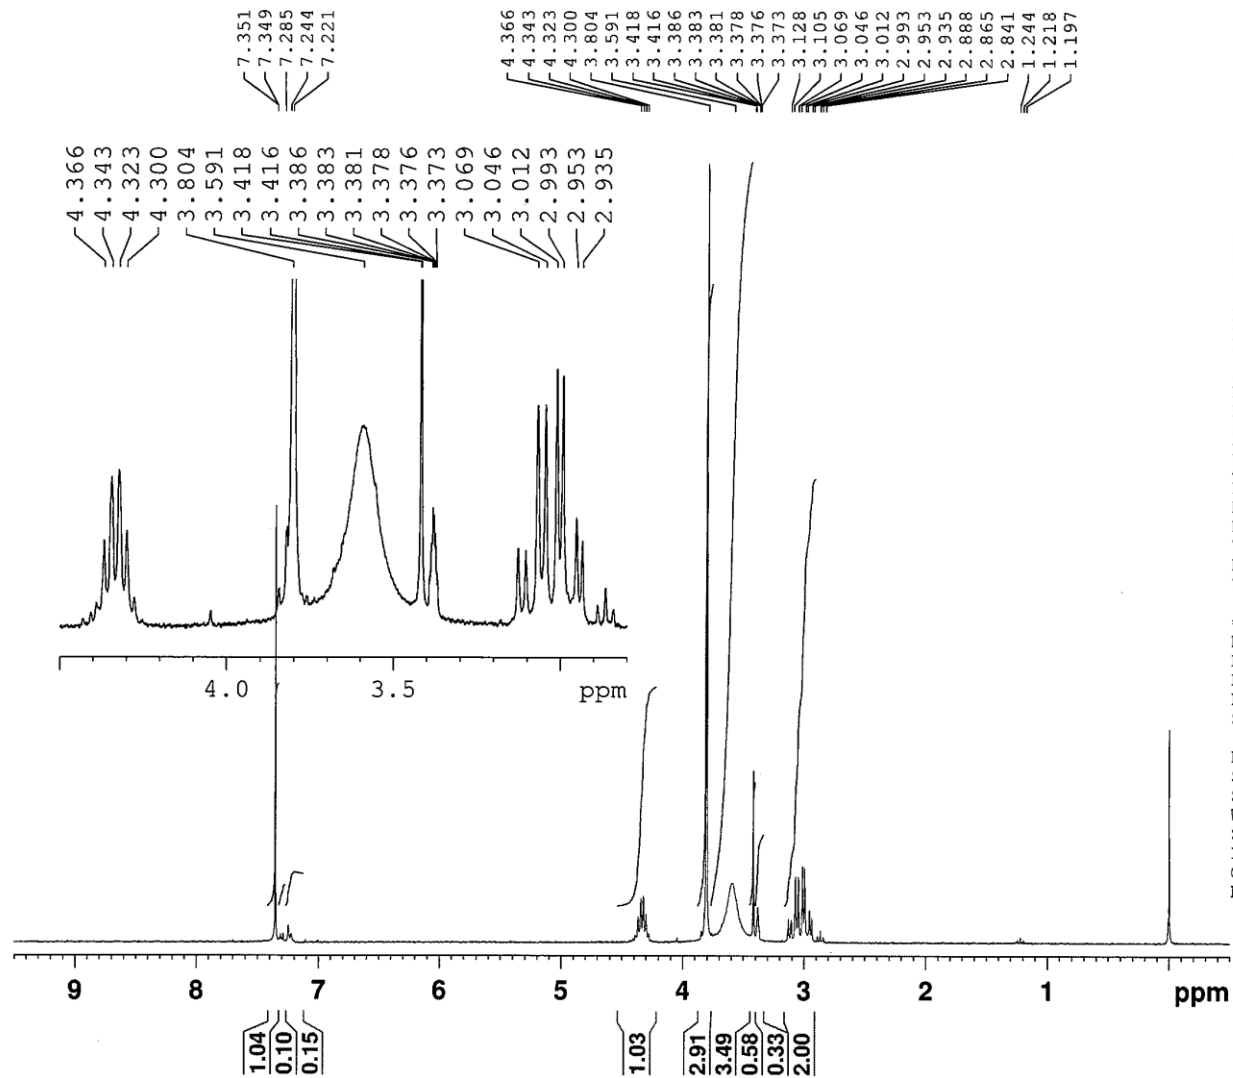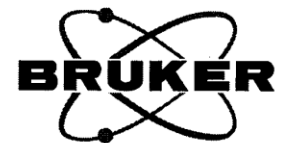

Current Data Parameters  
NAME A12ta020rk  
EXPNO 15112704  
PROCNO 1

F2 - Acquisition Parameters  
Date\_ 20151127  
Time 16.48  
INSTRUM spect  
PROBHD 5 mm PABBO BB-  
PULPROG zg30  
TD 65536  
SOLVENT CDC13  
NS 8  
DS 2  
SWH 6188.119 Hz  
FIDRES 0.094423 Hz  
AQ 5.2953587 sec  
RG 203  
DW 80.800 usec  
DE 6.50 usec  
TE 297.0 K  
D1 1.00000000 sec  
TDO 1

==== CHANNEL f1 =====  
NUC1 1H  
P1 15.00 usec  
PL1 1.20 dB  
PL1W 8.19348145 W  
SFO1 300.1318534 MHz

F2 - Processing parameters  
SI 32768  
SF 300.1299784 MHz  
WDW EM  
SSB 0  
LB 0.30 Hz  
GB 0  
PC 1.00

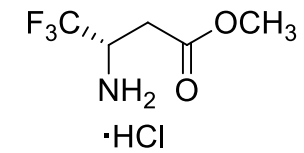

(S)-6

- ACCEPTANCE - System: AV300 OrderNo.: JH033009 Customer: Saitama University Engineer: IKD  
 P/N Console: Z108356/162 Shim system: BOSS I original dataset: 104275\_0150snf 3 1  
 Probe: 5 mm PABBO BB-1H/D Z-GRD Z104275/0150 Sample depth:20 Gas: air  
 Sensitivity test for 19F (additional test); Sample: 0,05% TFT in CDC13 (P/N: Z10234)  
 Sino= 243:1 ( signal= -61 - -65 ppm noise= -59.08 - -60.08 ppm [1 ppm] noise range= 4.5 ppm )  
 P1= 15usec PL1= -0.3dB

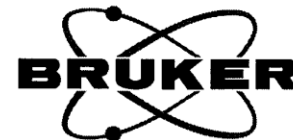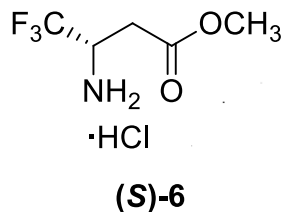

---75.394

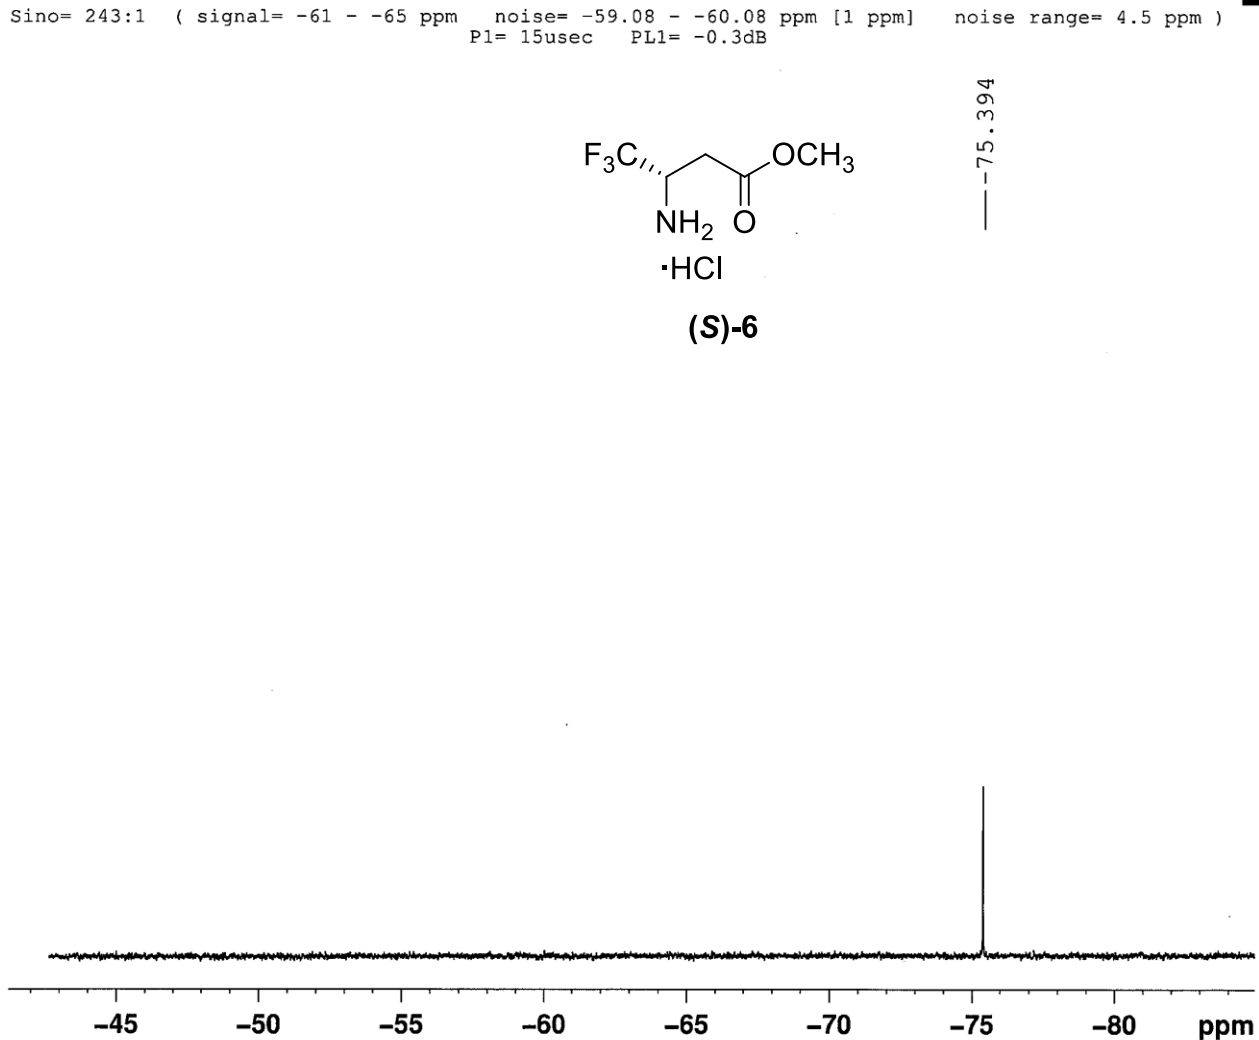

Current Data Parameters  
 NAME A12ta020rk  
 EXPNO 15101302  
 PROCNO 1

F2 - Acquisition Parameters  
 Date\_ 20151013  
 Time 13.07  
 INSTRUM spect  
 PROBHD 5 mm PABBO BB-  
 PULPROG zgfhigqn  
 TD 32768  
 SOLVENT CDC13  
 NS 8  
 DS 0  
 SWH 12019.230 Hz  
 FIDRES 0.366798 Hz  
 AQ 1.3631988 sec  
 RG 203  
 DW 41.600 usec  
 DE 6.50 usec  
 TE 296.7 K  
 D1 10.00000000 sec  
 D11 0.03000000 sec  
 D12 0.00002000 sec  
 TD0 1

===== CHANNEL f1 =====  
 NUC1 19F  
 P1 15.00 usec  
 PL1 -0.30 dB  
 PL1W 10.09325600 W  
 SFO1 282.3865635 MHz

===== CHANNEL f2 =====  
 CPDPRG2 waltz16  
 NUC2 1H  
 PCPD2 80.00 usec  
 PL2 0.58 dB  
 PL12 16.50 dB  
 PL2W 9.45079708 W  
 PL12W 0.24180678 W  
 SFO2 300.1300000 MHz

F2 - Processing parameters  
 SI 16384  
 SF 282.4046252 MHz  
 WDW EM  
 SSB 0  
 LB 2.00 Hz  
 GB 0  
 PC 1.00

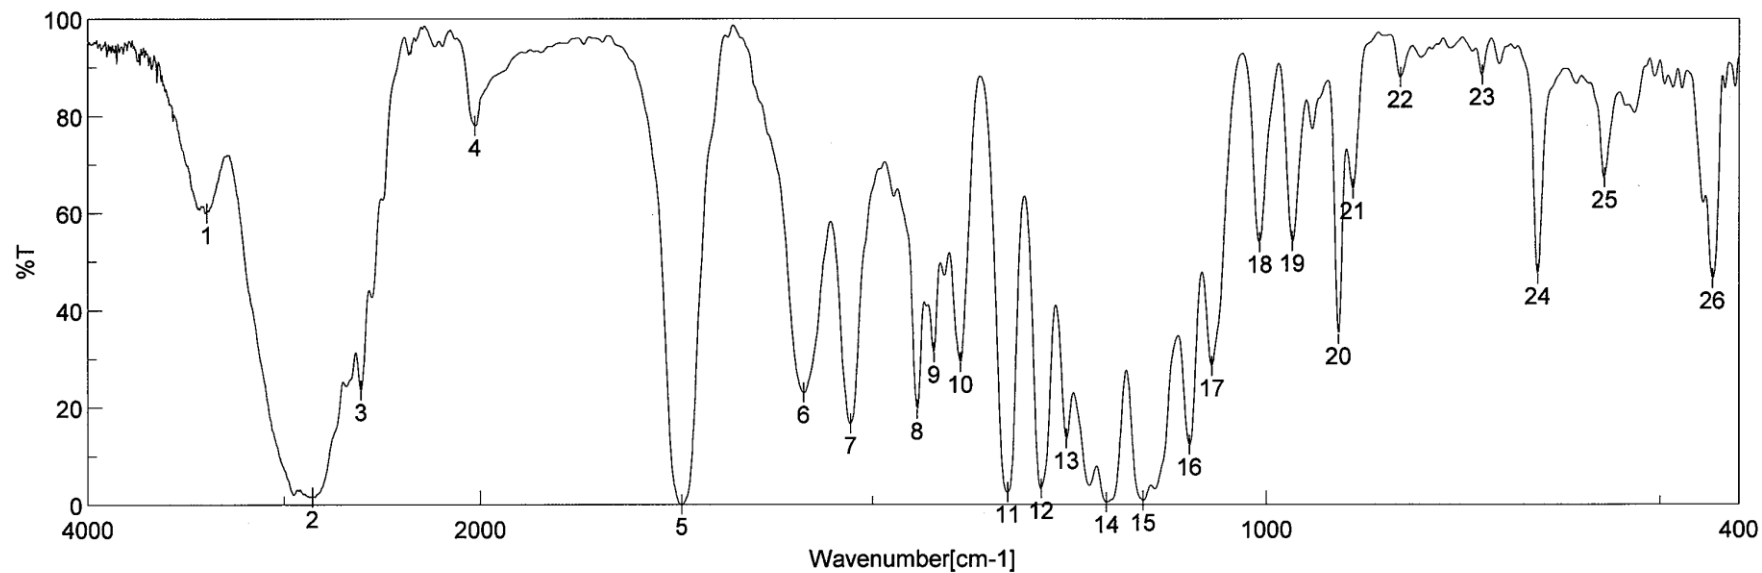

積算回数  
ゼロフィリング  
ゲイン  
測定日時  
測定者  
ファイル名  
サンプル名  
コメント

16  
ON  
32  
2016/02/28 15:39  
kawamata  
Memory#2  
(S)-9

分解  
アポダイゼーション  
スキャンスピード  
更新日時

4 cm-1  
Cosine  
2 mm/sec  
2016/02/28 15:41

|     |          |       |     |          |       |     |          |       |     |          |       |
|-----|----------|-------|-----|----------|-------|-----|----------|-------|-----|----------|-------|
| 1:  | 3395.07, | 60.07 | 2:  | 2856.06, | 1.62  | 3:  | 2608.25, | 23.62 | 4:  | 2026.82, | 78.08 |
| 5:  | 1744.30, | 0.10  | 6:  | 1588.09, | 23.07 | 7:  | 1528.31, | 16.80 | 8:  | 1443.46, | 19.68 |
| 9:  | 1422.24, | 31.37 | 10: | 1388.50, | 29.32 | 11: | 1328.71, | 2.62  | 12: | 1286.29, | 3.39  |
| 13: | 1254.47, | 13.63 | 14: | 1203.36, | 0.55  | 15: | 1157.08, | 0.95  | 16: | 1098.26, | 12.38 |
| 17: | 1069.33, | 28.57 | 18: | 1008.59, | 53.99 | 19: | 967.13,  | 54.20 | 20: | 908.31,  | 35.08 |
| 21: | 889.99,  | 64.98 | 22: | 830.21,  | 88.01 | 23: | 726.07,  | 88.48 | 24: | 654.71,  | 47.48 |
| 25: | 569.86,  | 67.33 | 26: | 433.91,  | 46.55 |     |          |       |     |          |       |

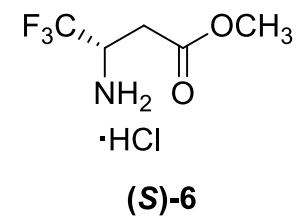

1H

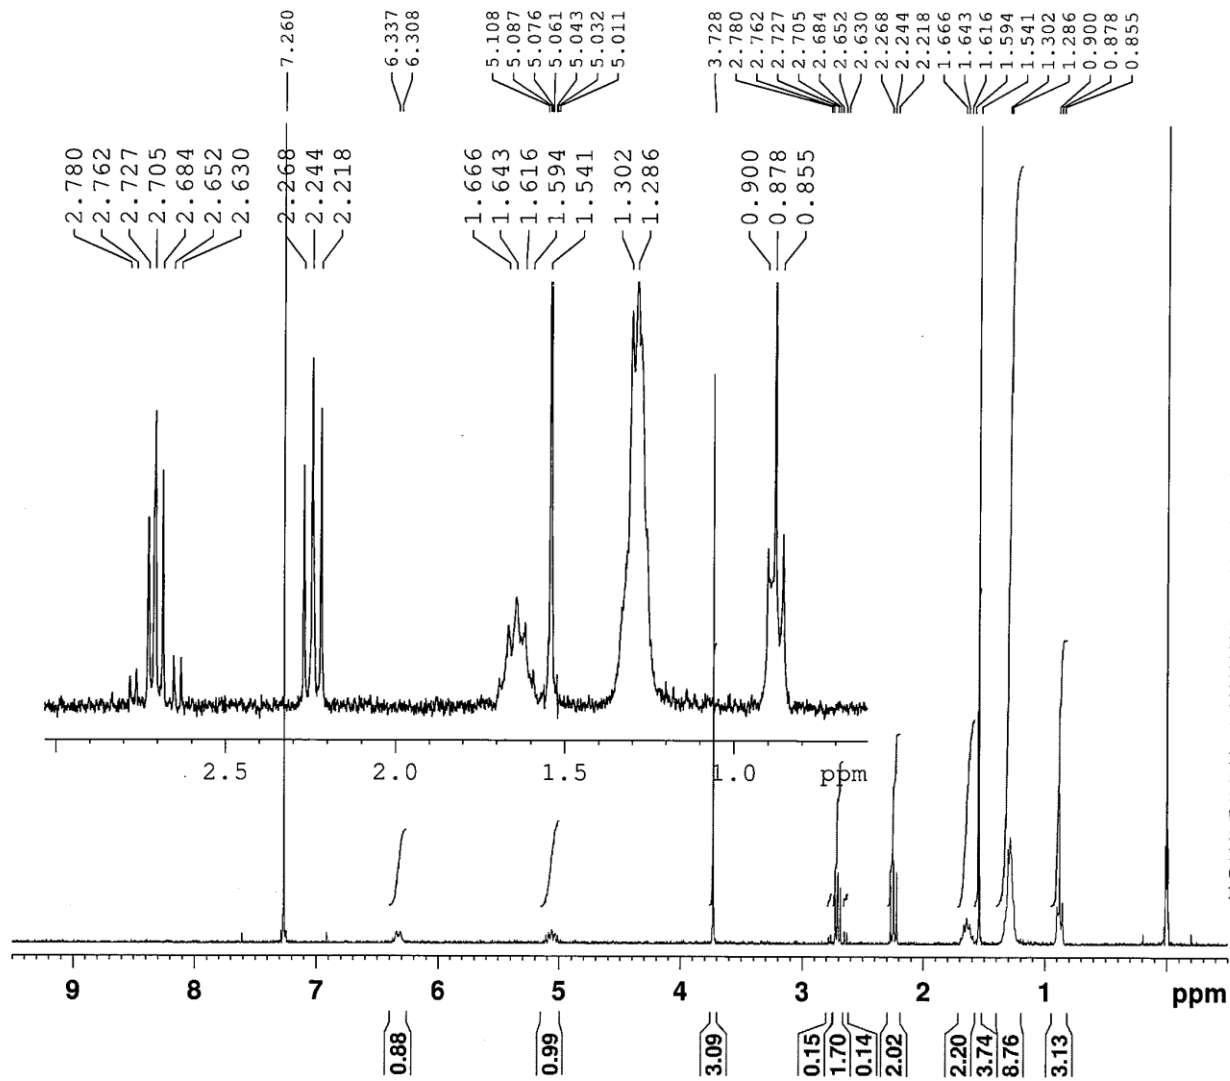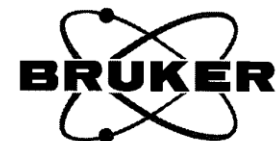

Current Data Parameters  
 NAME A12ta020rk  
 EXPNO 16020301  
 PROCNO 1

F2 - Acquisition Parameters  
 Date\_ 20160203  
 Time 15.47  
 INSTRUM spect  
 PROBHD 5 mm PABBO BB-  
 PULPROG zg30  
 TD 65536  
 SOLVENT CDC13  
 NS 8  
 DS 2  
 SWH 6188.119 Hz  
 FIDRES 0.094423 Hz  
 AQ 5.2953587 sec  
 RG 203  
 DW 80.800 usec  
 DE 6.50 usec  
 TE 297.2 K  
 D1 1.00000000 sec  
 TD0 1

==== CHANNEL f1 =====  
 NUC1 1H  
 P1 15.00 usec  
 PL1 1.20 dB  
 PL1W 8.19348145 W  
 SFO1 300.1318534 MHz

F2 - Processing parameters  
 SI 32768  
 SF 300.1300059 MHz  
 WDW EM  
 SSB 0  
 LB 0.30 Hz  
 GB 0  
 PC 1.00

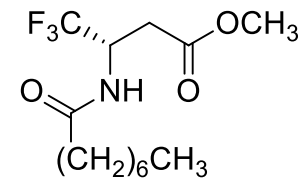

13C with dec. CPQNP

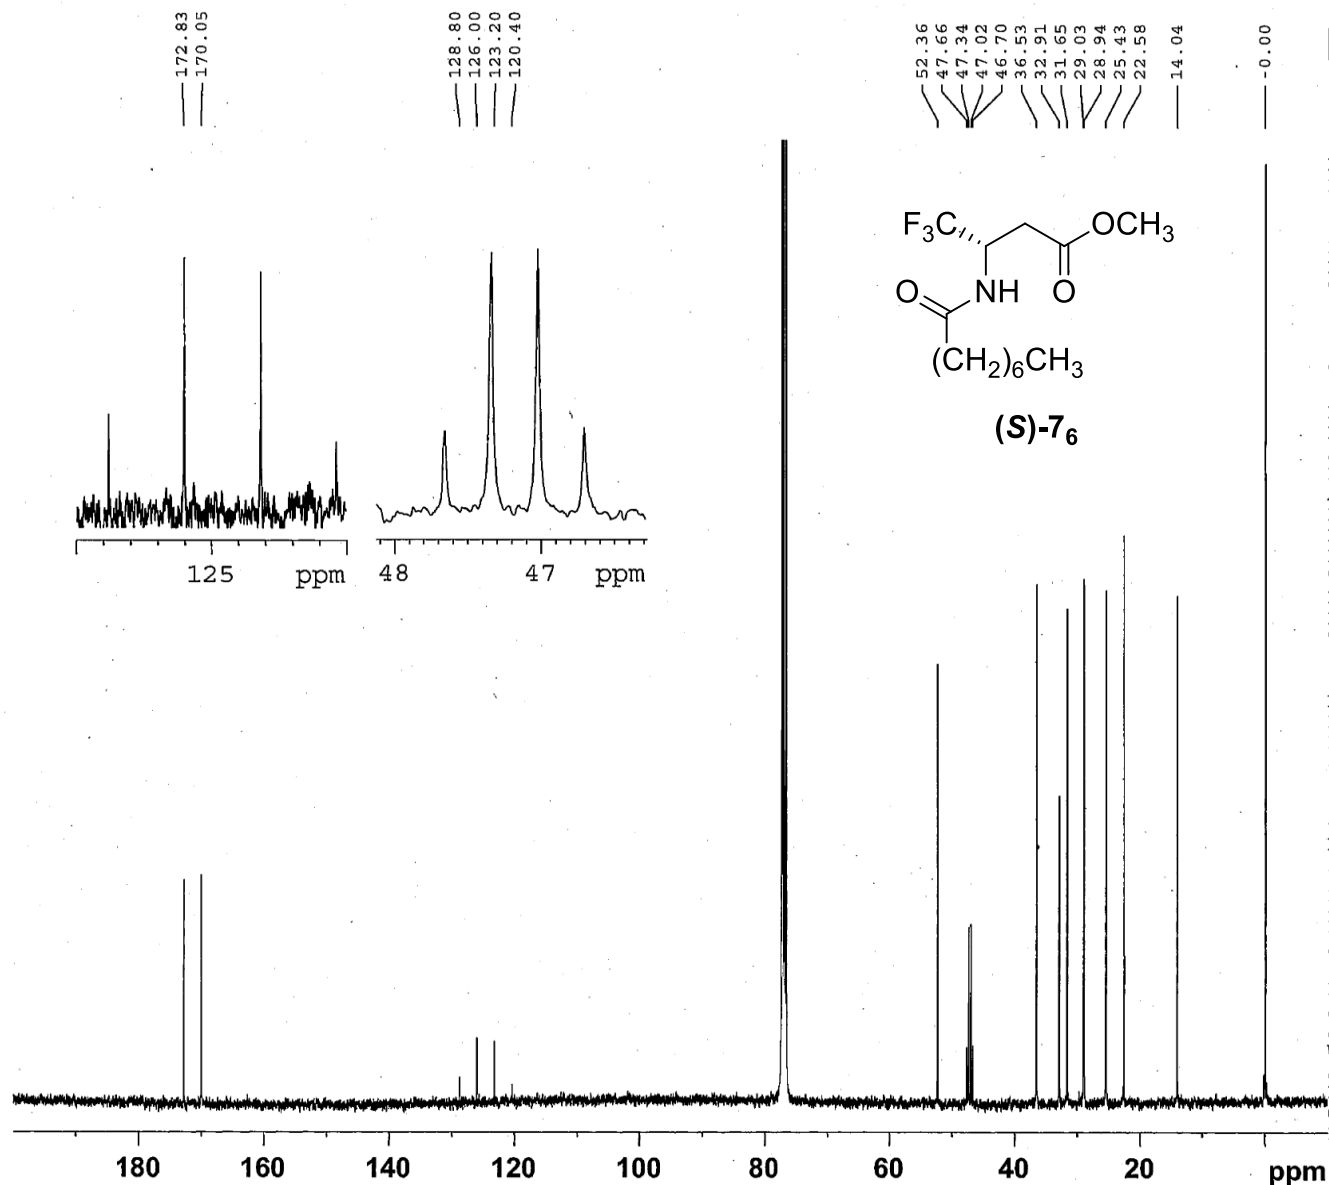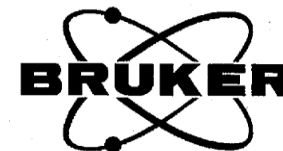

Current Data Parameters  
 NAME kodama  
 EXPNO 3  
 PROCNO 1

F2 - Acquisition Parameters  
 Date\_ 20170807  
 Time 18.39  
 INSTRUM spect  
 PROBHD 5 mm CPQNP 1H/  
 PULPROG zgpg30  
 TD 65536  
 SOLVENT CDCl3  
 NS 512  
 DS 2  
 SWH 29761.904 Hz  
 FIDRES 0.454131 Hz  
 AQ 1.1010548 sec  
 RG 126.99  
 DW 16.800 usec  
 DE 18.00 usec  
 TE 300.0 K  
 D1 2.0000000 sec  
 D11 0.03000000 sec  
 TD0 1

==== CHANNEL f1 =====  
 NUC1 13C  
 P1 12.00 usec  
 PLW1 15.50000000 W  
 SFO1 100.6248425 MHz

==== CHANNEL f2 =====  
 CPDPRG2 waltz16  
 NUC2 1H  
 PCPD2 90.00 usec  
 PLW2 5.19999981 W  
 PLW12 0.14444000 W  
 PLW13 0.11700000 W  
 SFO2 400.1316005 MHz

F2 - Processing parameters  
 SI 32768  
 SF 100.6127668 MHz  
 WDW EM  
 SSB 0  
 LB 2.00 Hz  
 GB 0  
 PC 1.40



- ACCEPTANCE - System: AV300 OrderNo.: JH033009 Customer: Saitama University Engineer: IKD  
 P/N Console: Z108356/162 Shim system: BOSS I original dataset: 104275\_0150snf 3 1  
 Probe: 5 mm PABBO BB-1H/D Z-GRD Z104275/0150 Sample depth:20 Gas: air  
 Sensitivity test for 19F (additional test); Sample: 0,05% TFT in CDC13 (P/N: Z10234)

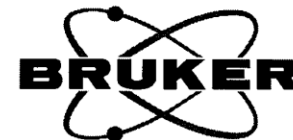

Sino= 243:1 ( signal= -61 - -65 ppm noise= -59.08 - -60.08 ppm [1 ppm] noise range= 4.5 ppm )  
 P1= 15usec PL1= -0.3dB

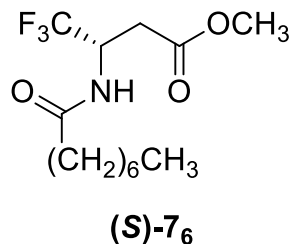

---76.663

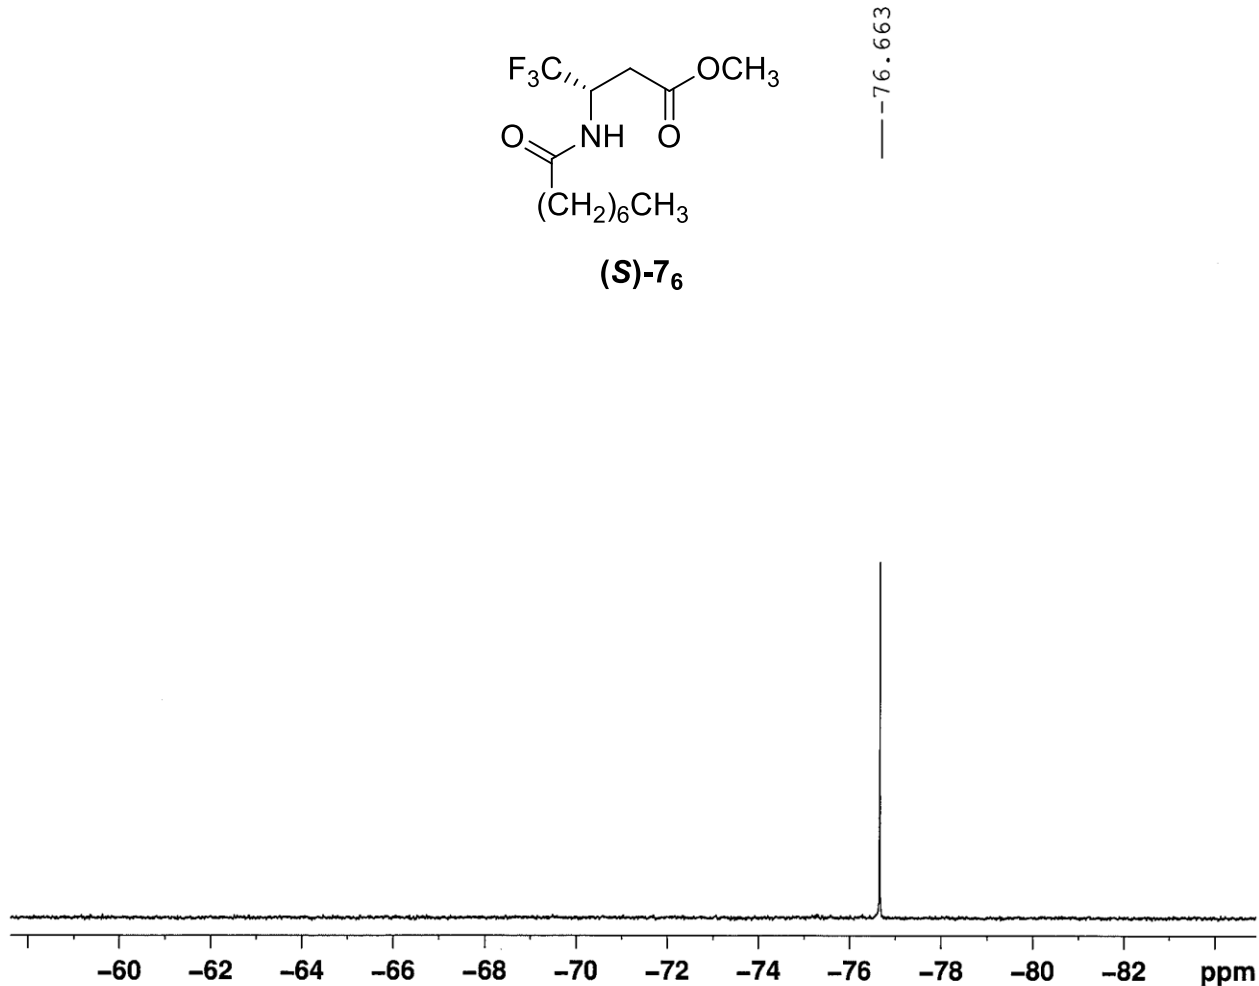

Current Data Parameters  
 NAME A12ta020rk  
 EXPNO 16020202  
 PROCNO 1

F2 - Acquisition Parameters  
 Date\_ 20160202  
 Time\_ 10.08  
 INSTRUM spect  
 PROBHD 5 mm PABBO BB-  
 PULPROG zgfhigqn  
 TD 32768  
 SOLVENT CDC13  
 NS 1  
 DS 0  
 SWH 12019.230 Hz  
 FIDRES 0.366798 Hz  
 AQ 1.3631988 sec  
 RG 203  
 DW 41.600 usec  
 DE 6.50 usec  
 TE 297.2 K  
 D1 10.00000000 sec  
 D11 0.03000000 sec  
 D12 0.00002000 sec  
 TD0 1

==== CHANNEL f1 =====  
 NUC1 19F  
 P1 15.00 usec  
 PL1 -0.30 dB  
 PL1W 10.09325600 W  
 SFO1 282.3865635 MHz

==== CHANNEL f2 =====  
 CPDPRG2 waltz16  
 NUC2 1H  
 PCPD2 80.00 usec  
 PL2 0.58 dB  
 PL12 16.50 dB  
 PL2W 9.45079708 W  
 PL12W 0.24180678 W  
 SFO2 300.1300000 MHz

F2 - Processing parameters  
 SI 16384  
 SF 282.4046312 MHz  
 WDW EM  
 SSB 0  
 LB 2.00 Hz  
 GB 0  
 PC 1.00

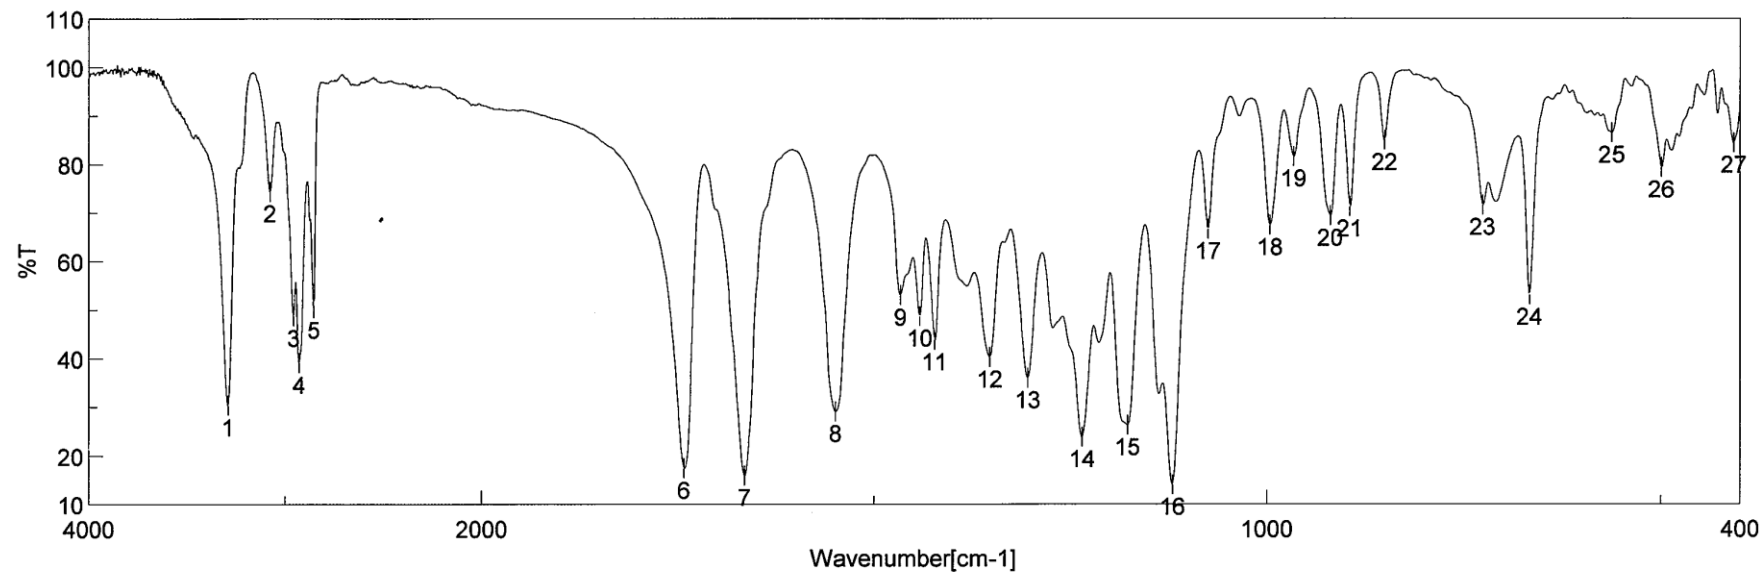

積算回数  
ゼロフィリング  
ゲイン  
測定日時  
測定者  
ファイル名  
サンプル名  
コメント

16  
ON  
16  
2016/02/04 17:07  
wangxy kawamata  
16020401  
~~poly-phenol-methol~~  
(s)-r0

分解  
アポダイゼーション  
スキャンスピード  
更新日時

4 cm-1  
Cosine  
2 mm/sec  
2016/02/29 16:10

|     |          |       |     |          |       |     |          |       |     |          |       |
|-----|----------|-------|-----|----------|-------|-----|----------|-------|-----|----------|-------|
| 1:  | 3288.04, | 30.44 | 2:  | 3075.90, | 74.41 | 3:  | 2957.30, | 48.79 | 4:  | 2929.34, | 39.15 |
| 5:  | 2853.17, | 50.45 | 6:  | 1741.41, | 17.47 | 7:  | 1664.27, | 15.95 | 8:  | 1548.56, | 29.14 |
| 9:  | 1466.60, | 53.07 | 10: | 1441.53, | 48.77 | 11: | 1422.24, | 43.88 | 12: | 1351.86, | 40.36 |
| 13: | 1303.64, | 36.06 | 14: | 1234.22, | 23.93 | 15: | 1176.36, | 26.37 | 16: | 1119.48, | 14.13 |
| 17: | 1074.16, | 66.73 | 18: | 996.05,  | 67.49 | 19: | 966.16,  | 81.70 | 20: | 918.91,  | 69.45 |
| 21: | 893.84,  | 71.37 | 22: | 849.49,  | 85.02 | 23: | 725.10,  | 71.68 | 24: | 665.32,  | 53.20 |
| 25: | 561.18,  | 86.57 | 26: | 499.47,  | 79.43 | 27: | 407.87,  | 84.54 |     |          |       |

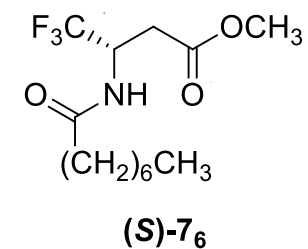

1H

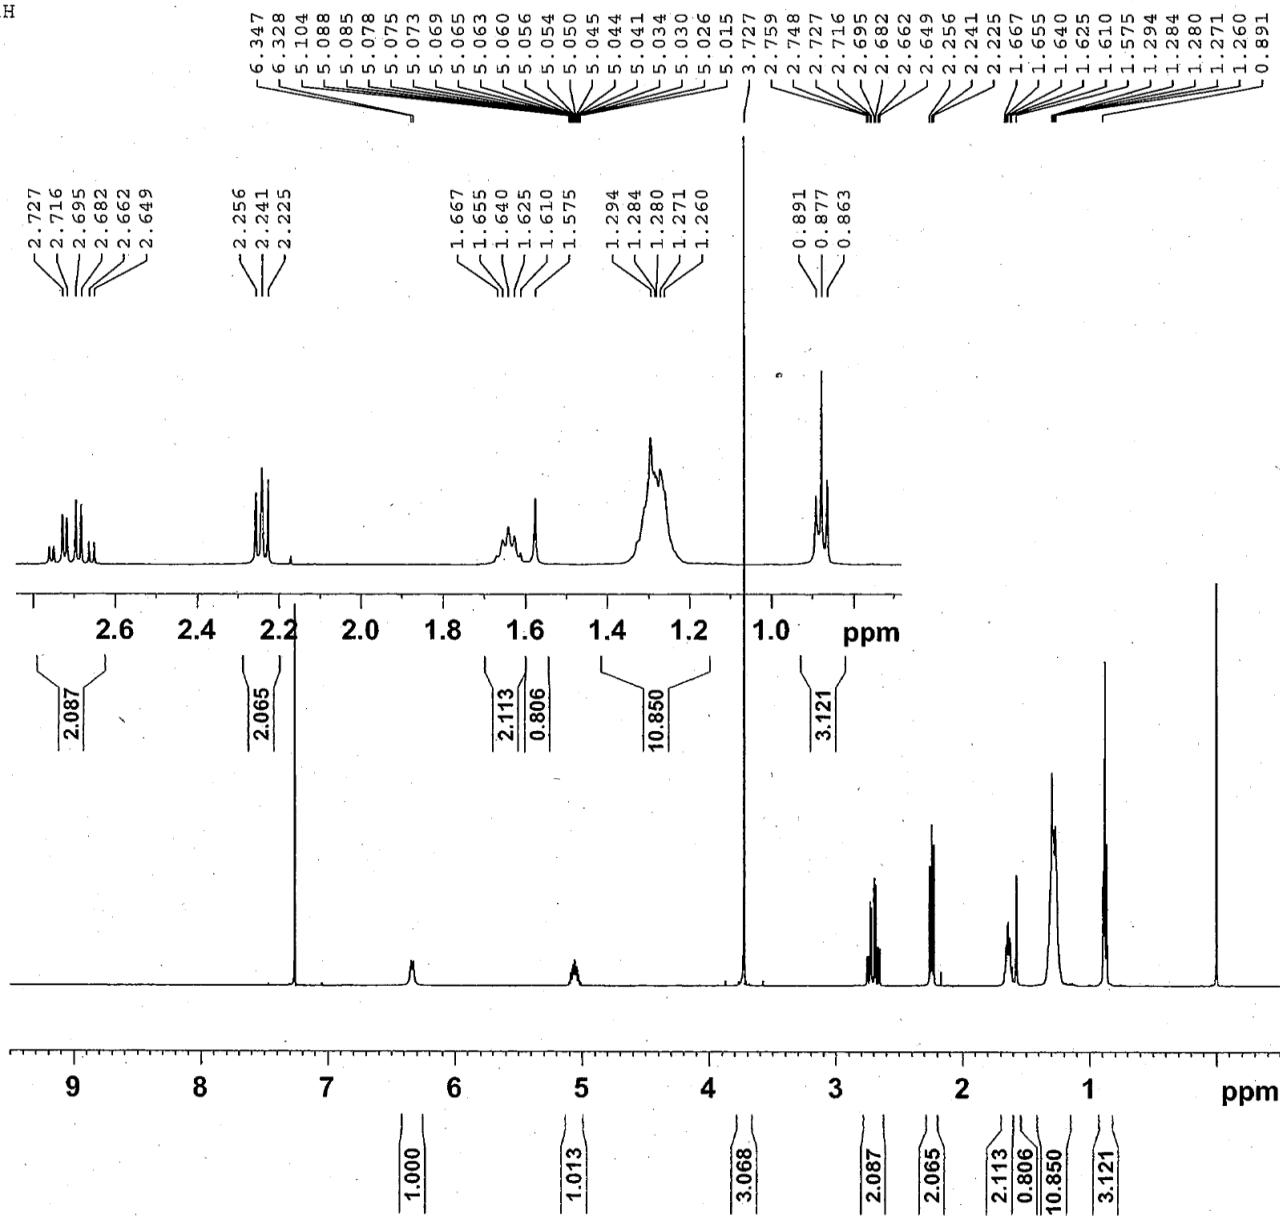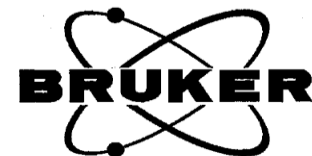

NAME A16mc211rk  
 EXPNO 17091102  
 PROCNO 1  
 Date 20170911  
 Time 15.49  
 INSTRUM spect  
 PROBHD 5 mm PABBO BB-  
 PULPROG zg30  
 TD 65536  
 SOLVENT CDCl3  
 NS 8  
 DS 2  
 SWH 10330.578 Hz  
 FIDRES 0.157632 Hz  
 AQ 3.1719923 sec  
 RG 203  
 DW 48.400 usec  
 DE 6.50 usec  
 TE 300.9 K  
 D1 1.00000000 sec  
 TD0 1

----- CHANNEL f1 -----  
 NUC1 1H  
 P1 11.80 usec  
 PL1 2.40 dB  
 PL1W 15.17711735 W  
 SFO1 500.0330885 MHz  
 SI 32768  
 SF 500.0300102 MHz  
 WDW EM  
 SSB 0  
 LB 0.30 Hz  
 GB 0  
 PC 1.00

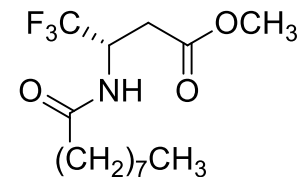

! with dec. CPQ

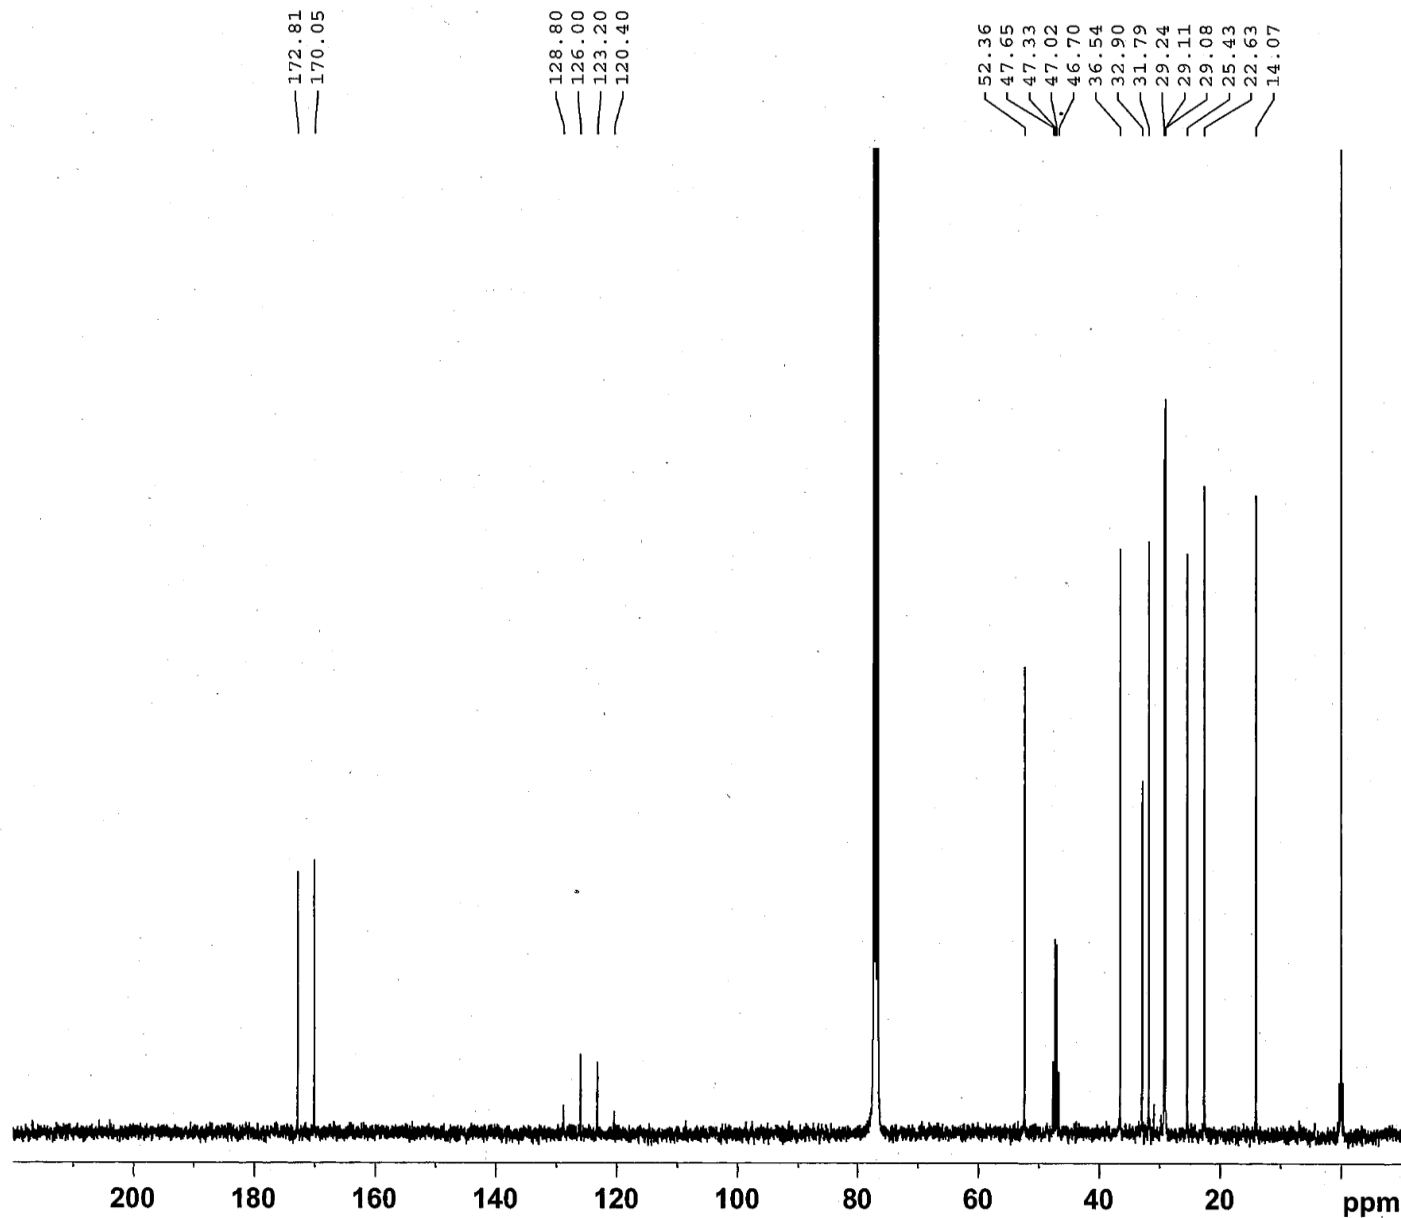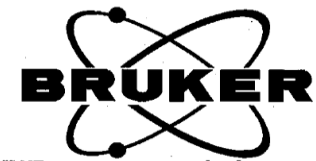

NAME kodama  
EXPNO 3  
PROCNO 1  
Date\_ 20170912  
Time\_ 18.16  
INSTRUM spect  
PROBHD 5 mm CPQNP 1H/  
PULPROG zgpg30  
TD 65536  
SOLVENT CDCl3  
NS 464  
DS 2  
SWH 29761.904 Hz  
FIDRES 0.454131 Hz  
AQ 1.1010548 sec  
RG 126.99  
DW 16.800 usec  
DE 18.00 usec  
TE 300.0 K  
D1 2.00000000 sec  
D11 0.03000000 sec  
TDO 1

==== CHANNEL f1 =====  
NUC1 13C  
P1 12.00 usec  
SI 32768  
SF 100.6127670 MHz  
WDW EM  
SSB 0  
LB 2.00 Hz  
GB 0  
PC 1.40

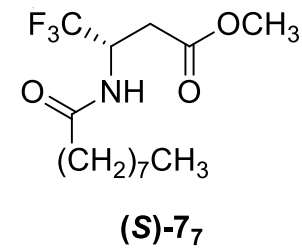

- ACCEPTANCE - System: AV300 OrderNo.: JH033009 Customer: Saitama University Engineer: IKD  
 P/N Console: Z108356/162 Shim system: BOSS I original dataset: 104275\_0150snf 3 1  
 Probe: 5 mm PABBO BB-1H/D Z-GRD Z104275/0150 Sample depth:20 Gas: air  
 Sensitivity test for 19F (additional test); Sample: 0,05% TFT in CDC13 (P/N: Z10234)  
 Sino= 243:1 ( signal= -61 - -65 ppm noise= -59.08 - -60.08 ppm [1 ppm] noise range= 4.5 ppm )  
 P1= 15usec PL1= -0.3dB

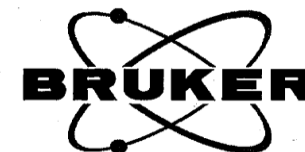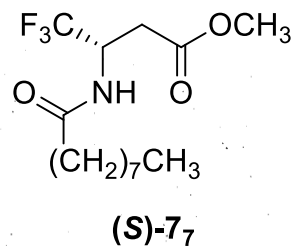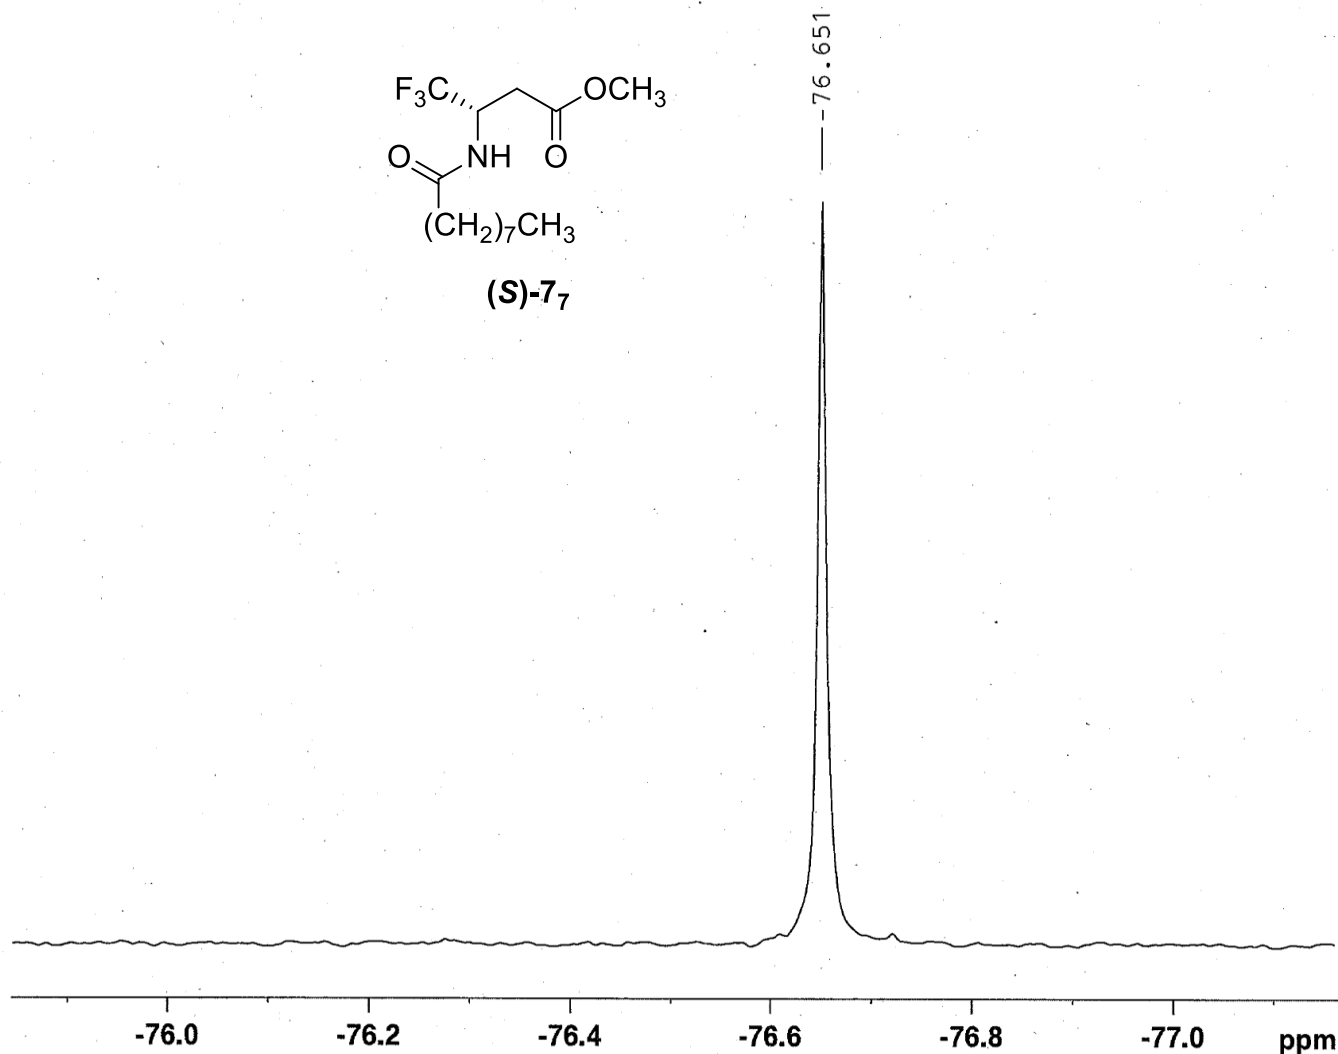

|         |                |
|---------|----------------|
| NAME    | A16mc211rk     |
| EXPNO   | 16100405       |
| PROCNO  | 1              |
| Date_   | 20161004       |
| Time    | 17.21          |
| INSTRUM | spect          |
| PROBHD  | 5 mm PABBO BB- |
| PULPROG | zgfhigqn       |
| TD      | 32768          |
| SOLVENT | CDC13          |
| NS      | 1              |
| DS      | 0              |
| SWH     | 12019.230 Hz   |
| FIDRES  | 0.366798 Hz    |
| AQ      | 1.3631988 sec  |
| RG      | 203            |
| DW      | 41.600 usec    |
| DE      | 6.50 usec      |
| TE      | 296.7 K        |
| D1      | 10.0000000 sec |
| D11     | 0.03000000 sec |
| D12     | 0.00002000 sec |
| TD0     | 1              |

  

|                        |                 |
|------------------------|-----------------|
| ===== CHANNEL f1 ===== |                 |
| NUC1                   | 19F             |
| P1                     | 15.00 usec      |
| PL1                    | -0.30 dB        |
| PL1W                   | 10.09325600 W   |
| SFO1                   | 282.3865635 MHz |

  

|                        |                 |
|------------------------|-----------------|
| ===== CHANNEL f2 ===== |                 |
| CPDPRG2                | waltz16         |
| NUC2                   | 1H              |
| PCPD2                  | 80.00 usec      |
| PL2                    | 0.58 dB         |
| PL12                   | 16.50 dB        |
| PL2W                   | 9.45079708 W    |
| PL12W                  | 0.24180678 W    |
| SFO2                   | 300.1300000 MHz |
| SI                     | 16384           |
| SF                     | 282.4046276 MHz |
| WDW                    | EM              |
| SSB                    | 0               |
| LB                     | 2.00 Hz         |
| GB                     | 0               |
| PC                     | 1.00            |

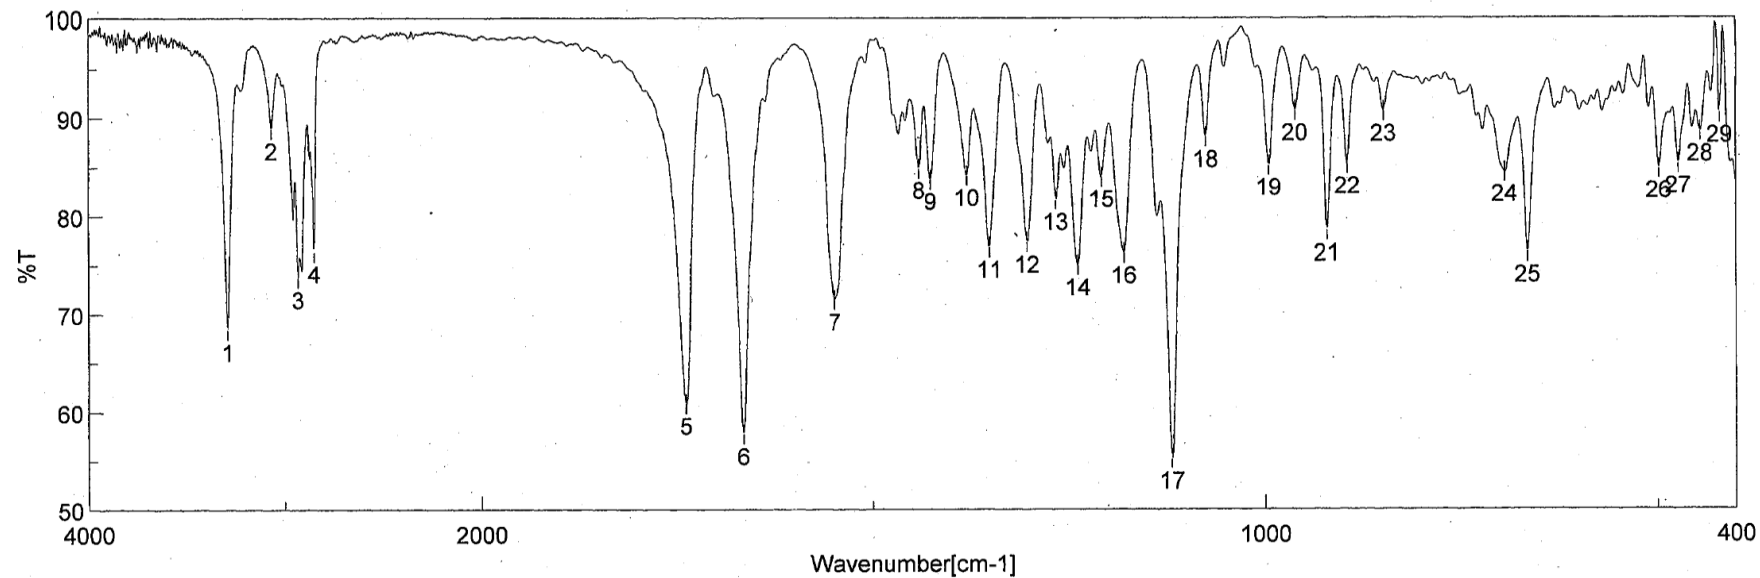

積算回数  
ゼロフィリング  
ゲイン  
測定日時  
測定者  
ファイル名  
サンプル名  
コメント

16  
ON  
8  
2016/11/22 12:40  
kawamata  
Memory#2  
s-10-c9

分解  
アポダイゼーション  
スキャンスピード  
更新日時

4 cm-1  
Cosine  
2 mm/sec  
2016/11/22 12:42

|     |          |       |     |          |       |     |          |       |     |          |       |
|-----|----------|-------|-----|----------|-------|-----|----------|-------|-----|----------|-------|
| 1:  | 3292.86, | 68.41 | 2:  | 3069.16, | 88.98 | 3:  | 2934.16, | 73.75 | 4:  | 2851.24, | 76.44 |
| 5:  | 1739.48, | 60.88 | 6:  | 1666.20, | 57.77 | 7:  | 1548.56, | 71.48 | 8:  | 1440.56, | 84.92 |
| 9:  | 1426.10, | 83.74 | 10: | 1379.82, | 84.16 | 11: | 1350.89, | 76.88 | 12: | 1302.68, | 77.38 |
| 13: | 1266.04, | 81.67 | 14: | 1238.08, | 75.03 | 15: | 1208.18, | 84.02 | 16: | 1179.26, | 76.31 |
| 17: | 1118.51, | 55.24 | 18: | 1075.12, | 88.14 | 19: | 995.09,  | 85.22 | 20: | 961.34,  | 90.80 |
| 21: | 920.84,  | 78.53 | 22: | 894.81,  | 85.38 | 23: | 848.53,  | 90.73 | 24: | 694.25,  | 84.54 |
| 25: | 665.32,  | 76.31 | 26: | 498.51,  | 84.87 | 27: | 473.44,  | 85.36 | 28: | 445.48,  | 88.64 |
| 29: | 420.41,  | 90.54 |     |          |       |     |          |       |     |          |       |

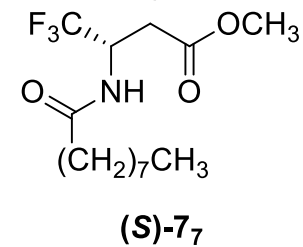

1H

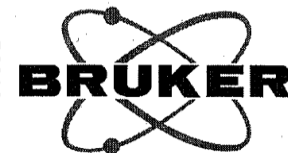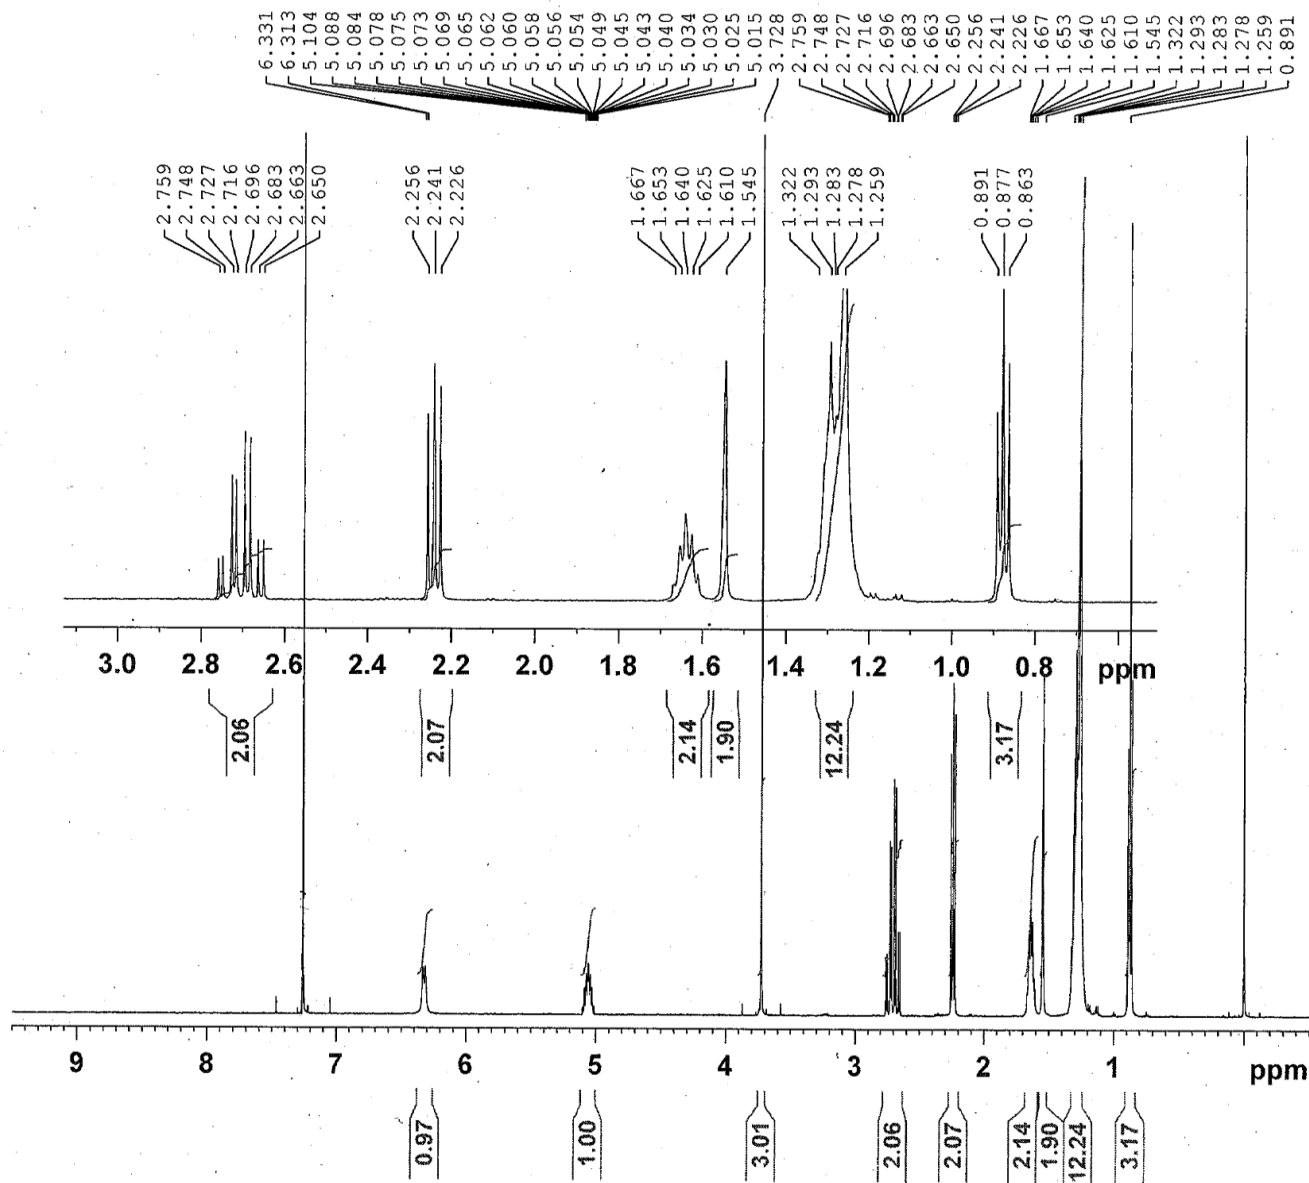

Current Data Parameters  
 NAME Al6mc211rk  
 EXPNO 17062002  
 PROCNO 1

F2 - Acquisition Parameters  
 Date\_ 20170620  
 Time 10.00  
 INSTRUM spect  
 PROBHD 5 mm PABBO BB-  
 PULPROG zg30  
 TD 65536  
 SOLVENT CDCl3  
 NS 8  
 DS 2  
 SWH 10330.578 Hz  
 FIDRES 0.157632 Hz  
 AQ 3.1719923 sec  
 RG 203  
 DW 48.400 usec  
 DE 6.50 usec  
 TE 299.9 K  
 D1 1.00000000 sec  
 TD0 1

===== CHANNEL f1 =====  
 NUC1 1H  
 P1 11.80 usec  
 PL1 2.40 dB  
 PL1W 15.17711735 W  
 SFO1 500.0330885 MHz

F2 - Processing parameters  
 SI 32768  
 SF 500.0300109 MHz  
 WDW EM  
 SSB 0  
 LB 0.30 Hz  
 GB 0  
 PC 1.00

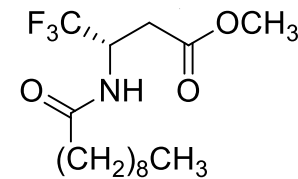

13C with dec. CPQNP

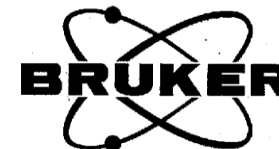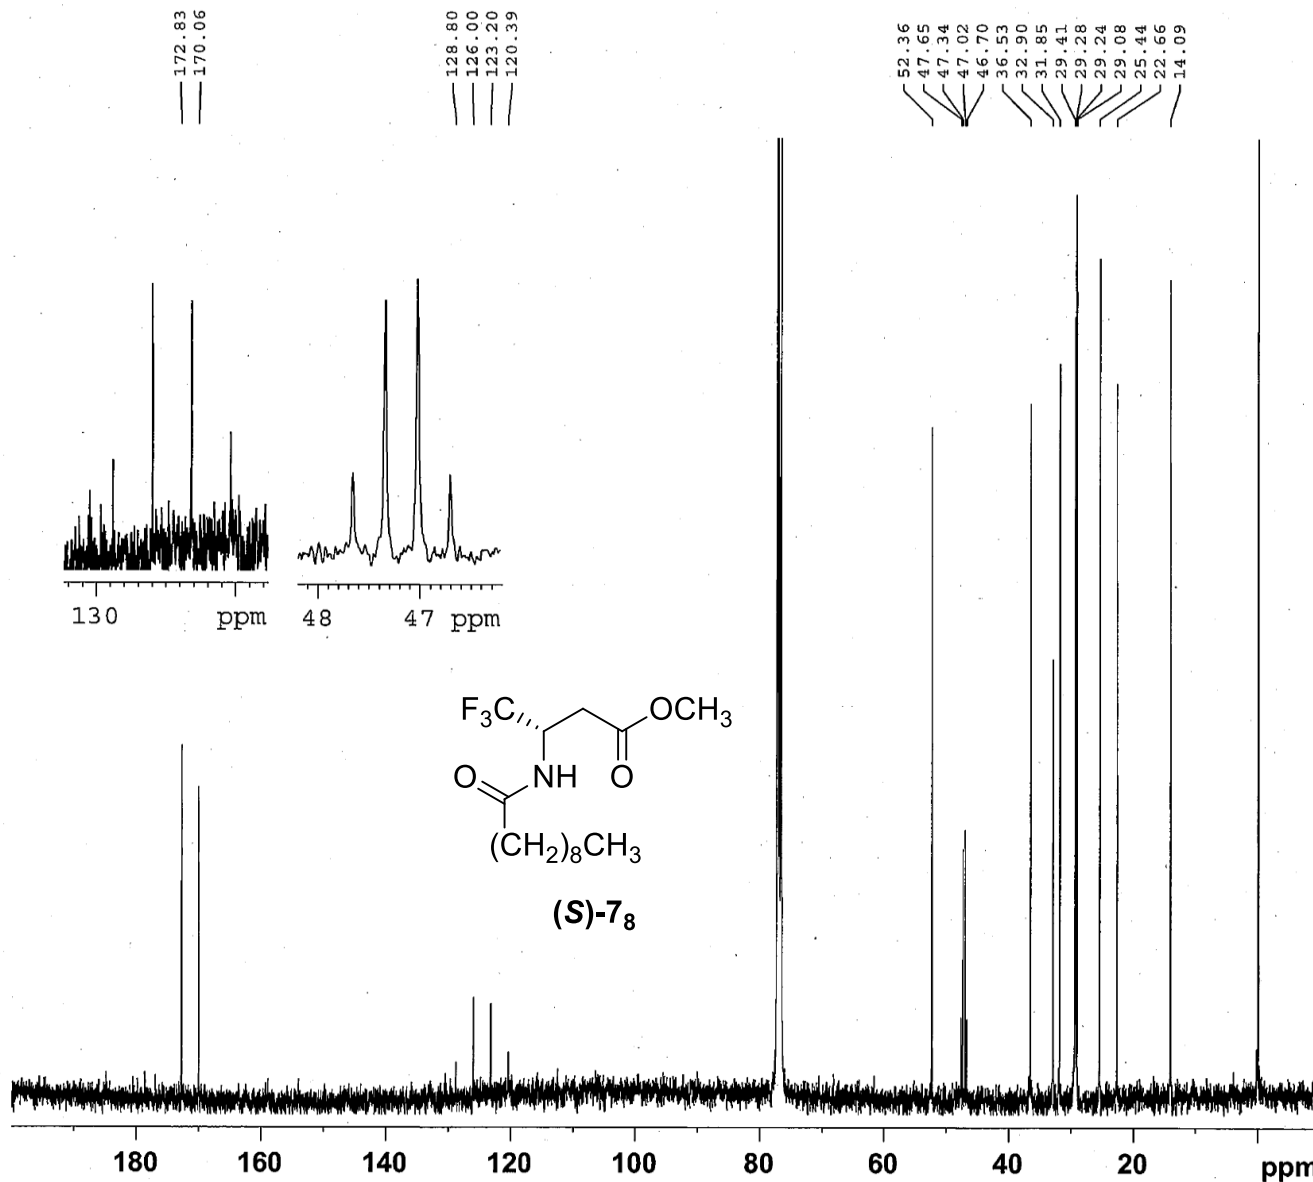

Current Data Parameters  
 NAME kodama  
 EXPNO 2  
 PROCNO 1

F2 - Acquisition Parameters  
 Date\_ 20170807  
 Time 18.20  
 INSTRUM spect  
 PROBHD 5 mm CPQNP 1H/  
 PULPROG zgpg30  
 TD 65536  
 SOLVENT CDC13  
 NS 256  
 DS 2  
 SWH 29761.904 Hz  
 FIDRES 0.454131 Hz  
 AQ 1.1010548 sec  
 RG 126.99  
 DW 16.800 usec  
 DE 18.00 usec  
 TE 300.0 K  
 D1 2.00000000 sec  
 D11 0.03000000 sec  
 TD0 1

==== CHANNEL f1 =====  
 NUC1 13C  
 P1 12.00 usec  
 PLW1 15.50000000 W  
 SFO1 100.6248425 MHz

==== CHANNEL f2 =====  
 CPDPRG2 waltz16  
 NUC2 1H  
 PCPD2 90.00 usec  
 PLW2 5.19999981 W  
 PLW12 0.14444000 W  
 PLW13 0.11700000 W  
 SFO2 400.1316005 MHz

F2 - Processing parameters  
 SI 32768  
 SF 100.6127671 MHz  
 WDW EM  
 SSB 0  
 LB 2.00 Hz  
 GB 0  
 PC 1.40



- ACCEPTANCE - System: AV300 OrderNo.: JH033009 Customer: Saitama University Engineer: IKD  
 P/N Console: Z108356/162 Shim system: BOSS I original dataset: 104275\_0150snf 3 1  
 Probe: 5 mm PABBO BB-1H/D Z-GRD Z104275/0150 Sample depth:20 Gas: air  
 Sensitivity test for 19F (additional test); Sample: 0,05% TFT in CDCl3 (P/N: Z10234)

Sino= 243:1 ( signal= -61 - -65 ppm noise= -59.08 - -60.08 ppm [1 ppm] noise range= 4.5 ppm )  
 P1= 15usec PL1= -0.3dB

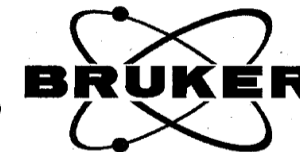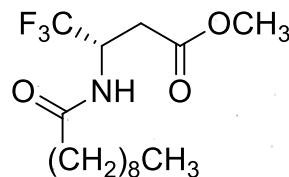

(S)-7<sub>8</sub>

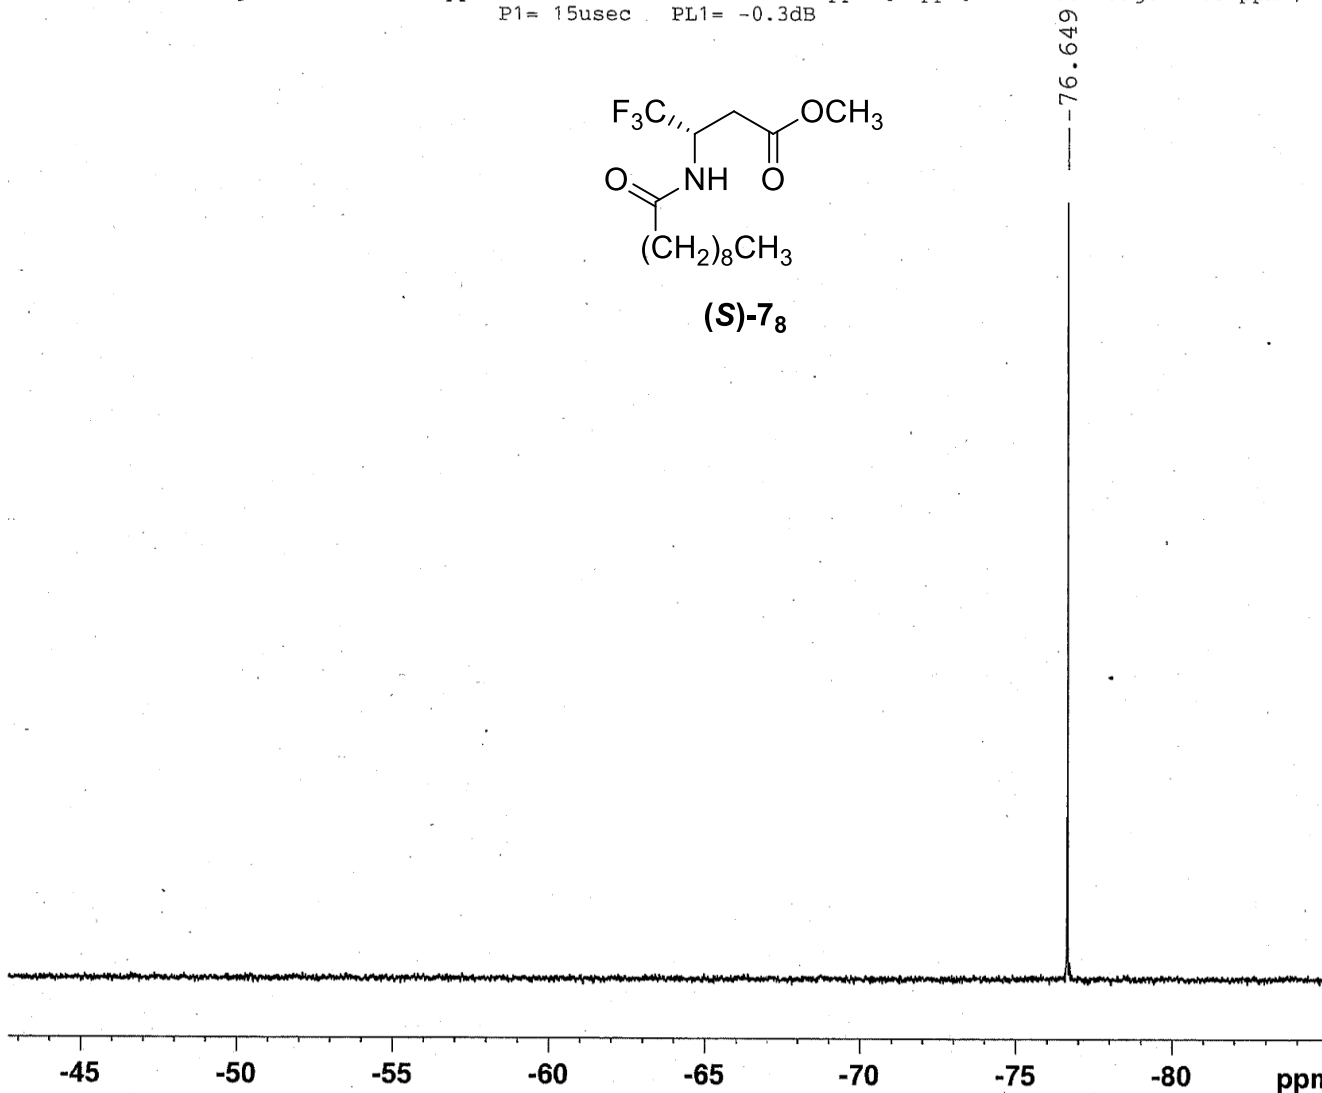

|         |                |
|---------|----------------|
| NAME    | A16mc211rk     |
| EXPNO   | 16100406       |
| PROCNO  | 1              |
| Date_   | 20161004       |
| Time    | 17.25          |
| INSTRUM | spect          |
| PROBHD  | 5 mm PABBO BB- |
| PULPROG | zgfhigqn       |
| TD      | 32768          |
| SOLVENT | CDCl3          |
| NS      | 1              |
| DS      | 0              |
| SWH     | 12019.230 Hz   |
| FIDRES  | 0.366798 Hz    |
| AQ      | 1.3631988 sec  |
| RG      | 203            |
| DW      | 41.600 usec    |
| DE      | 6.50 usec      |
| TE      | 296.6 K        |
| D1      | 10.0000000 sec |
| D11     | 0.0300000 sec  |
| D12     | 0.0000200 sec  |
| TDO     | 1              |

==== CHANNEL f1 =====

|      |                 |
|------|-----------------|
| NUC1 | 19F             |
| P1   | 15.00 usec      |
| PL1  | -0.30 dB        |
| PL1W | 10.09325600 W   |
| SFO1 | 282.3865635 MHz |

==== CHANNEL f2 =====

|         |                 |
|---------|-----------------|
| CPDPRG2 | waltz16         |
| NUC2    | 1H              |
| PCPD2   | 80.00 usec      |
| PL2     | 0.58 dB         |
| PL12    | 16.50 dB        |
| PL2W    | 9.45079708 W    |
| PL12W   | 0.24180678 W    |
| SFO2    | 300.1300000 MHz |
| SI      | 16384           |
| SF      | 282.4046276 MHz |
| WDW     | EM              |
| SSB     | 0               |
| LB      | 2.00 Hz         |
| GB      | 0               |
| PC      | 1.00            |

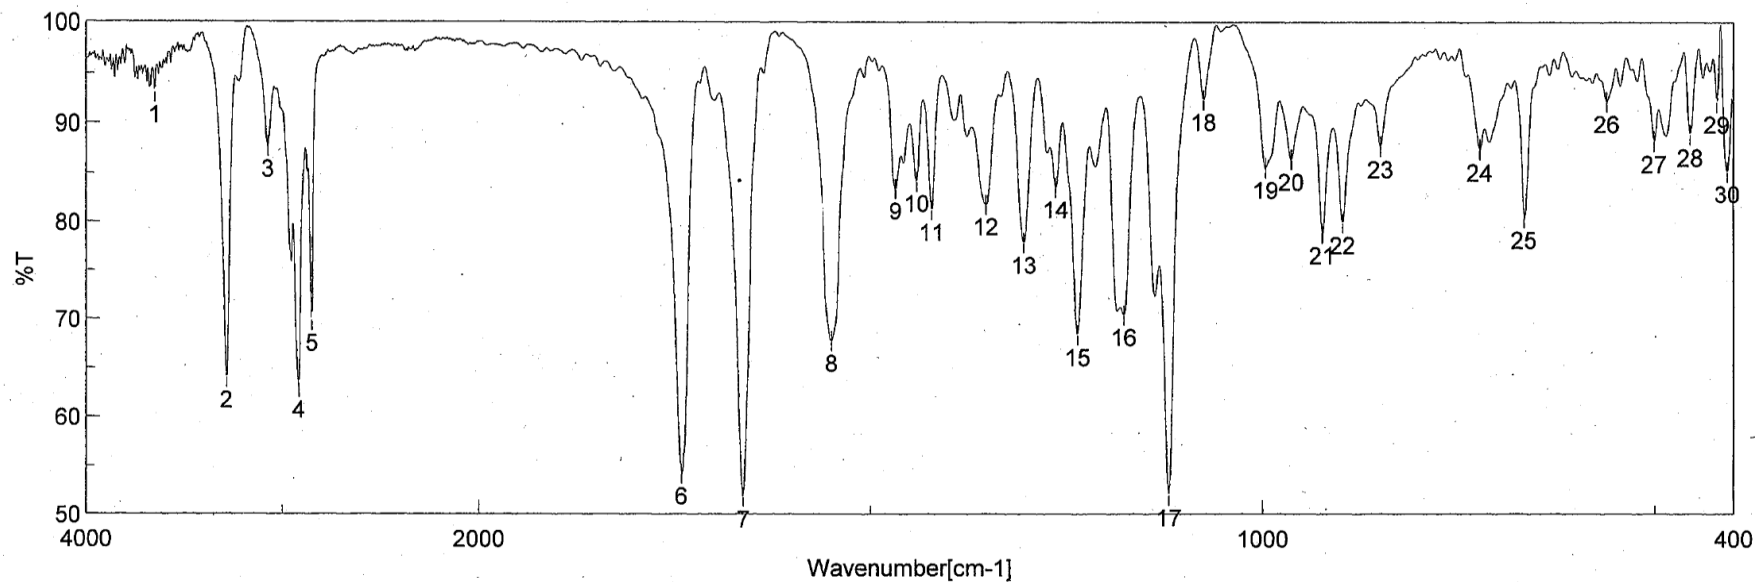

積算回数  
ゼロフィリング  
ゲイン  
測定日時  
測定者  
ファイル名  
サンプル名  
コメント

16  
ON  
8  
2016/11/22 12:58  
kawamata  
Memory#2  
s-10-c10

分解  
アポダイゼーション  
スキャンスピード  
更新日時

4 cm-1  
Cosine  
2 mm/sec  
2016/11/22 13:00

|     |          |       |     |          |       |     |          |       |     |          |       |
|-----|----------|-------|-----|----------|-------|-----|----------|-------|-----|----------|-------|
| 1:  | 3649.62, | 93.03 | 2:  | 3285.14, | 63.98 | 3:  | 3075.90, | 87.70 | 4:  | 2917.77, | 62.97 |
| 5:  | 2851.24, | 69.78 | 6:  | 1741.41, | 54.14 | 7:  | 1662.34, | 51.76 | 8:  | 1549.52, | 67.74 |
| 9:  | 1467.56, | 83.36 | 10: | 1440.56, | 84.15 | 11: | 1421.28, | 81.18 | 12: | 1351.86, | 81.74 |
| 13: | 1303.64, | 77.82 | 14: | 1263.15, | 83.53 | 15: | 1235.18, | 68.33 | 16: | 1176.36, | 70.40 |
| 17: | 1119.48, | 51.92 | 18: | 1075.12, | 92.31 | 19: | 996.05,  | 85.54 | 20: | 963.27,  | 86.40 |
| 21: | 923.74,  | 78.83 | 22: | 897.70,  | 79.84 | 23: | 849.49,  | 87.67 | 24: | 723.18,  | 87.34 |
| 25: | 666.29,  | 80.34 | 26: | 561.18,  | 92.13 | 27: | 501.40,  | 88.19 | 28: | 455.12,  | 88.84 |
| 29: | 421.37,  | 92.09 | 30: | 407.87,  | 85.15 |     |          |       |     |          |       |

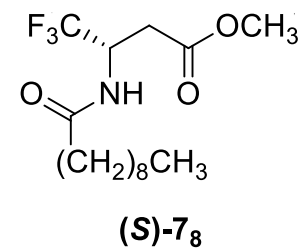

<sup>1</sup>H

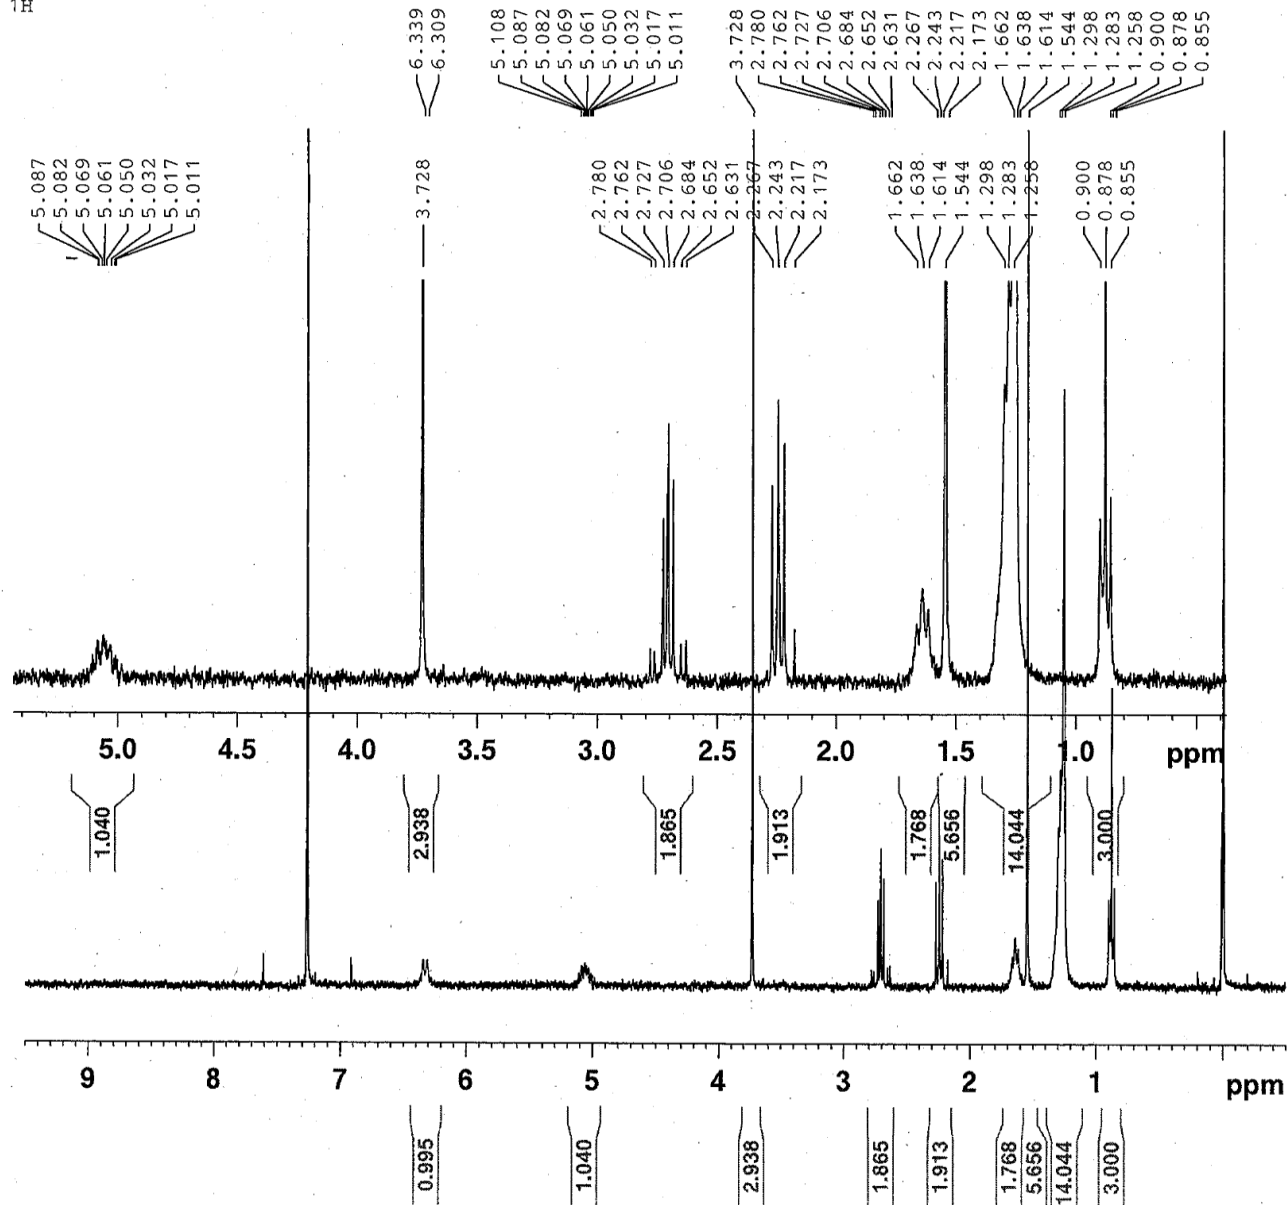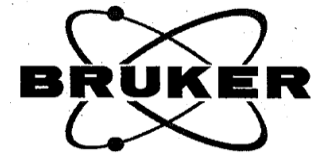

NAME A16mc211rk  
 EXPNO 17060204  
 PROCNO 1  
 Date\_ 20170602  
 Time 16.06  
 INSTRUM spect  
 PROBHD 5 mm PABBO BB-  
 PULPROG zg30  
 TD 65536  
 SOLVENT CDC13  
 NS 8  
 DS 2  
 SWH 6188.119 Hz  
 FIDRES 0.094423 Hz  
 AQ 5.2953587 sec  
 RG 203  
 DW 80.800 usec  
 DE 6.50 usec  
 TE 296.3 K  
 D1 1.00000000 sec  
 TD0 1

===== CHANNEL f1 =====  
 NUC1 <sup>1</sup>H  
 P1 15.00 usec  
 PL1 1.20 dB  
 PL1W 8.19348145 W  
 SFO1 300.1318534 MHz  
 SI 32768  
 SF 300.1300057 MHz  
 WDW EM  
 SSB 0  
 LB 0.30 Hz  
 GB 0  
 PC 1.00

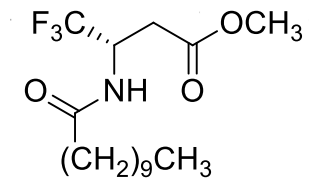

! with dec. CPQ

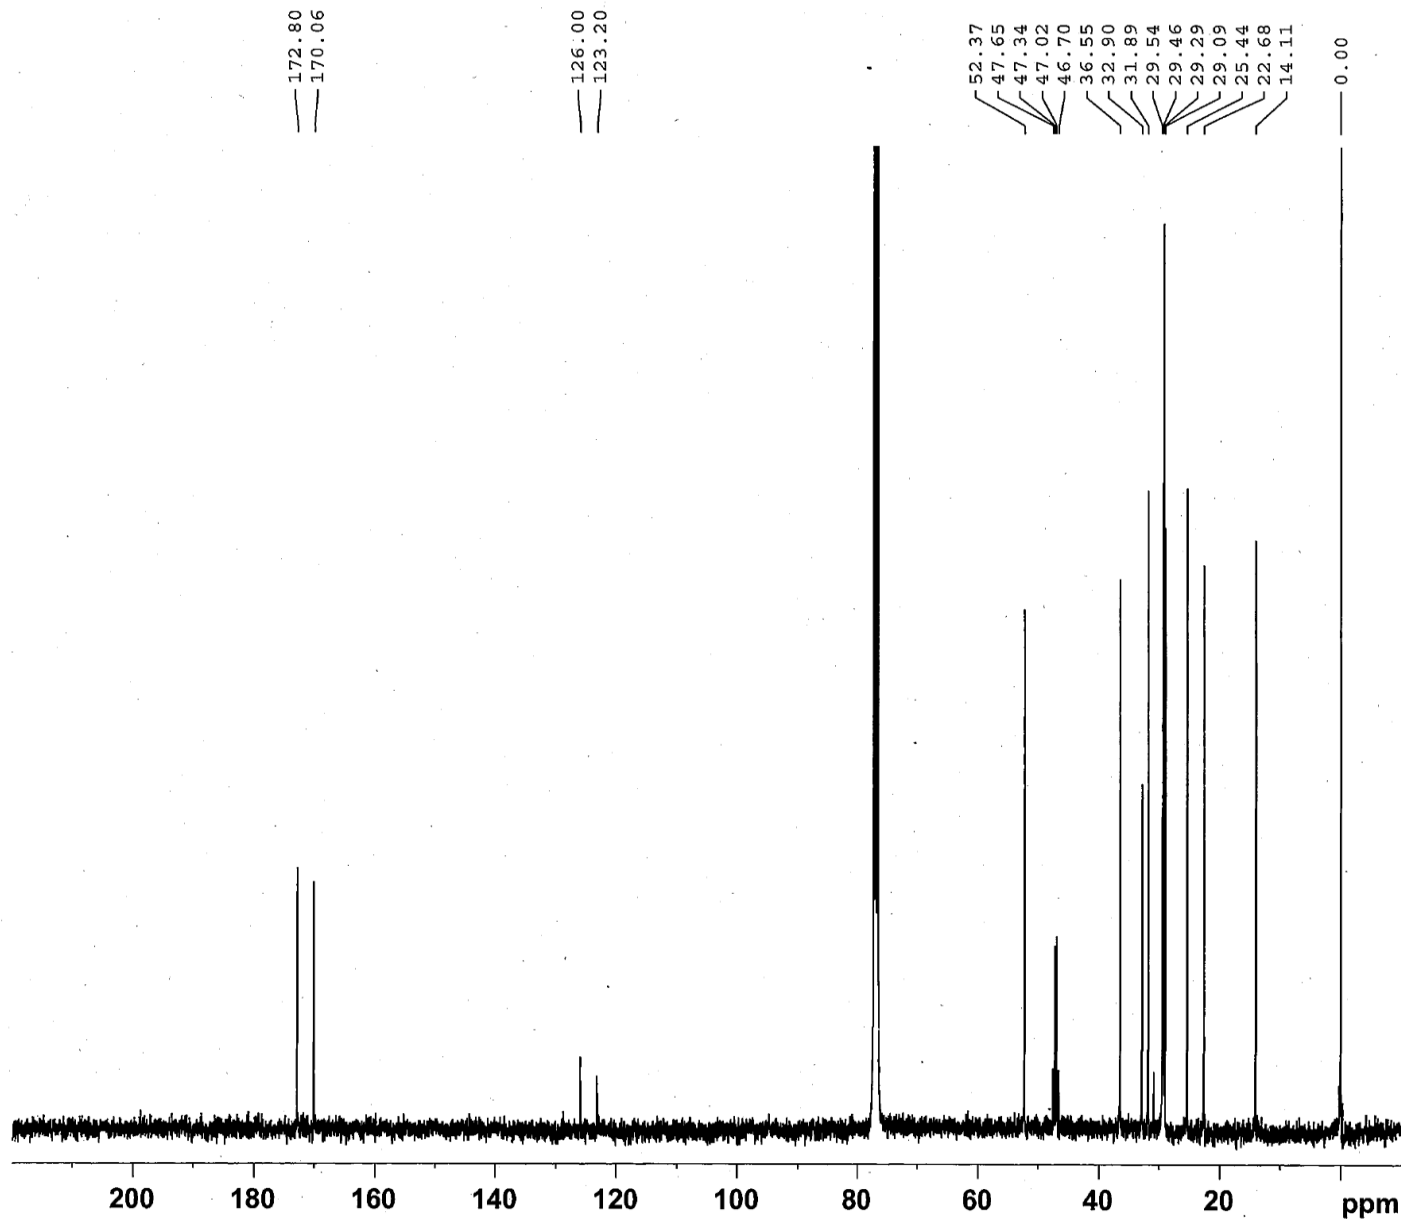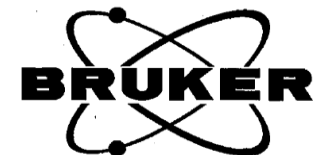

NAME kodama  
EXPNO 4  
PROCNO 1  
Date\_ 20170912  
Time\_ 18.40  
INSTRUM spect  
PROBHD 5 mm CPQNP 1H/  
PULPROG zgpg30  
TD 65536  
SOLVENT CDC13  
NS 512  
DS 2  
SWH 29761.904 Hz  
FIDRES 0.454131 Hz  
AQ 1.1010548 sec  
RG 126.99  
DW 16.800 usec  
DE 18.00 usec  
TE 300.0 K  
D1 2.00000000 sec  
D11 0.03000000 sec  
TD0 1

==== CHANNEL f1 =====  
NUC1 13C  
P1 12.00 usec  
SI 32768  
SF 100.6127666 MHz  
WDW EM  
SSB 0  
LB 2.00 Hz  
GB 0  
PC 1.40

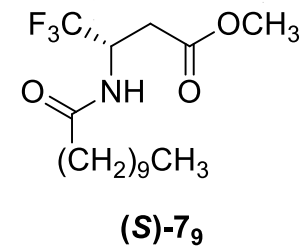

- ACCEPTANCE - System: AV300 OrderNo.: JH033009 Customer: Saitama University Engineer: IKD  
 P/N Console: Z108356/162 Shim system: BOSS I original dataset: 104275\_0150snf 3 1  
 Probe: 5 mm PABBO BB-1H/D Z-GRD Z104275/0150 Sample depth:20 Gas: air  
 Sensitivity test for 19F (additional test); Sample: 0,05% TFT in CDC13 (P/N: Z10234)

Sino= 243:1 ( signal= -61 - -65 ppm noise= -59.08 - -60.08 ppm [1 ppm] noise range= 4.5 ppm )  
 Pl= 15usec PL1= -0.3dB

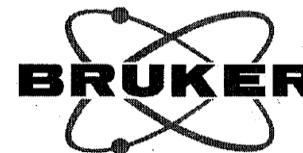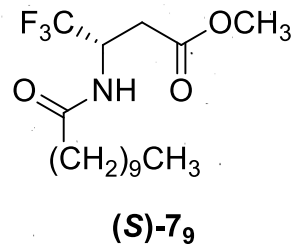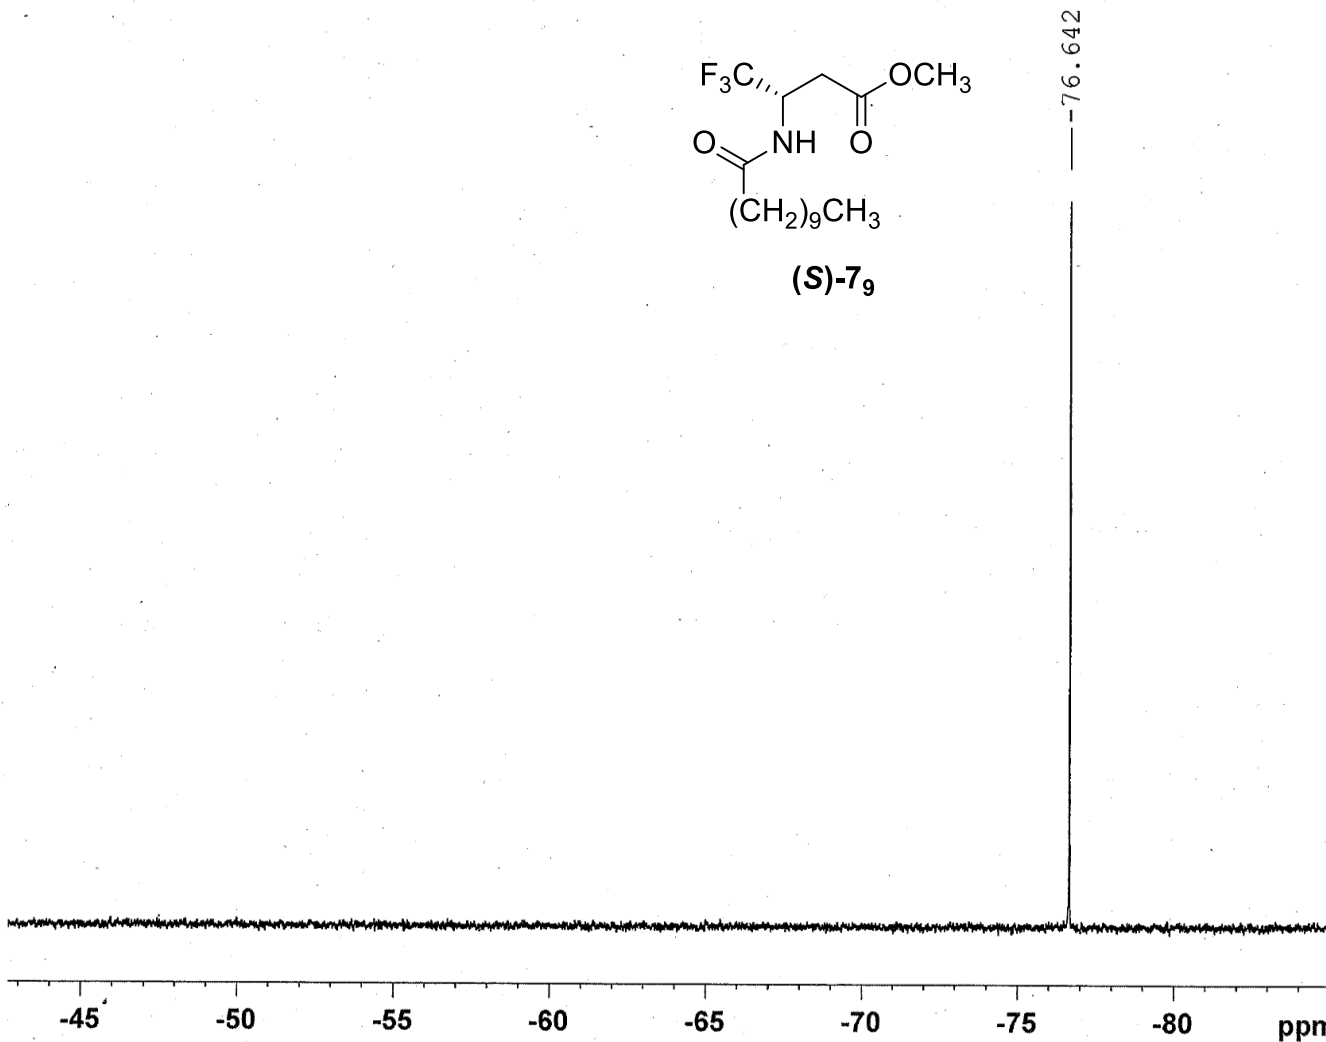

Current Data Parameters  
 NAME Al6mc211rk  
 EXPNO 16122002  
 PROCNO 1

F2 - Acquisition Parameters  
 Date 20161220  
 Time 10.12  
 INSTRUM spect  
 PROBHD 5 mm PABBO BB-  
 PULPROG zgfhigqn  
 TD 32768  
 SOLVENT CDC13  
 NS 1  
 DS 0  
 SWH 12019.230 Hz  
 FIDRES 0.366798 Hz  
 AQ 1.3631988 sec  
 RG 203  
 DW 41.600 usec  
 DE 6.50 usec  
 TE 296.7 K  
 D1 10.00000000 sec  
 D11 0.03000000 sec  
 D12 0.00002000 sec  
 TD0 1

===== CHANNEL f1 =====  
 NUC1 19F  
 P1 15.00 usec  
 PL1 -0.30 dB  
 PL1W 10.09325600 W  
 SFO1 282.3865635 MHz

===== CHANNEL f2 =====  
 CPDPRG2 waltz16  
 NUC2 1H  
 PCPD2 80.00 usec  
 PL2 0.58 dB  
 PL12 16.50 dB  
 PL2W 9.45079708 W  
 PL12W 0.24180678 W  
 SFO2 300.1300000 MHz

F2 - Processing parameters  
 SI 16384  
 SF 282.4046271 MHz  
 WDW EM  
 SSB 0  
 LB 2.00 Hz  
 GB 0  
 PC 1.00

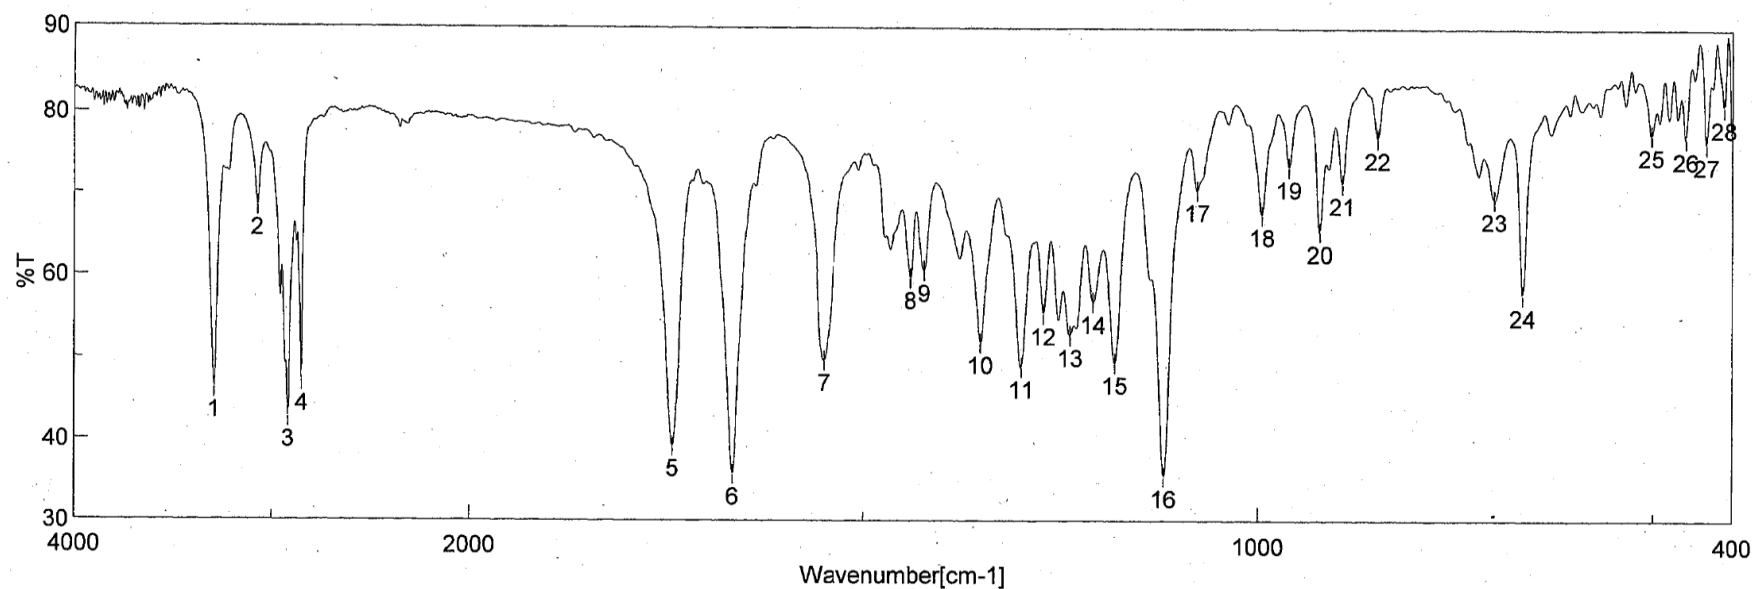

積算回数  
ゼロファイリング  
ゲイン  
測定日時  
測定者  
ファイル名  
サンプル名  
コメント

16  
ON  
8  
2017/09/19 14:37  
kawamata  
Memory#1  
S-CF3-C10-COOMe

分解  
アポダイゼーション  
スキャンスピード  
更新日時

4 cm-1  
Cosine  
2 mm/sec  
2017/09/19 14:41

|     |          |       |     |          |       |     |          |       |     |          |       |
|-----|----------|-------|-----|----------|-------|-----|----------|-------|-----|----------|-------|
| 1:  | 3291.89, | 46.20 | 2:  | 3073.01, | 68.42 | 3:  | 2916.81, | 42.64 | 4:  | 2850.27, | 47.07 |
| 5:  | 1742.37, | 39.14 | 6:  | 1666.20, | 35.72 | 7:  | 1550.49, | 49.69 | 8:  | 1440.56, | 59.77 |
| 9:  | 1423.21, | 60.66 | 10: | 1351.86, | 51.91 | 11: | 1299.79, | 48.89 | 12: | 1271.82, | 55.46 |
| 13: | 1238.08, | 52.81 | 14: | 1209.15, | 56.88 | 15: | 1181.19, | 49.45 | 16: | 1119.48, | 35.50 |
| 17: | 1077.05, | 70.58 | 18: | 995.09,  | 67.49 | 19: | 961.34,  | 73.46 | 20: | 921.81,  | 65.43 |
| 21: | 893.84,  | 71.44 | 22: | 849.49,  | 77.06 | 23: | 701.00,  | 69.51 | 24: | 665.32,  | 57.81 |
| 25: | 502.37,  | 77.56 | 26: | 458.98,  | 77.08 | 27: | 432.94,  | 76.41 | 28: | 410.76,  | 81.02 |

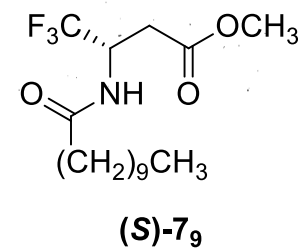

1H

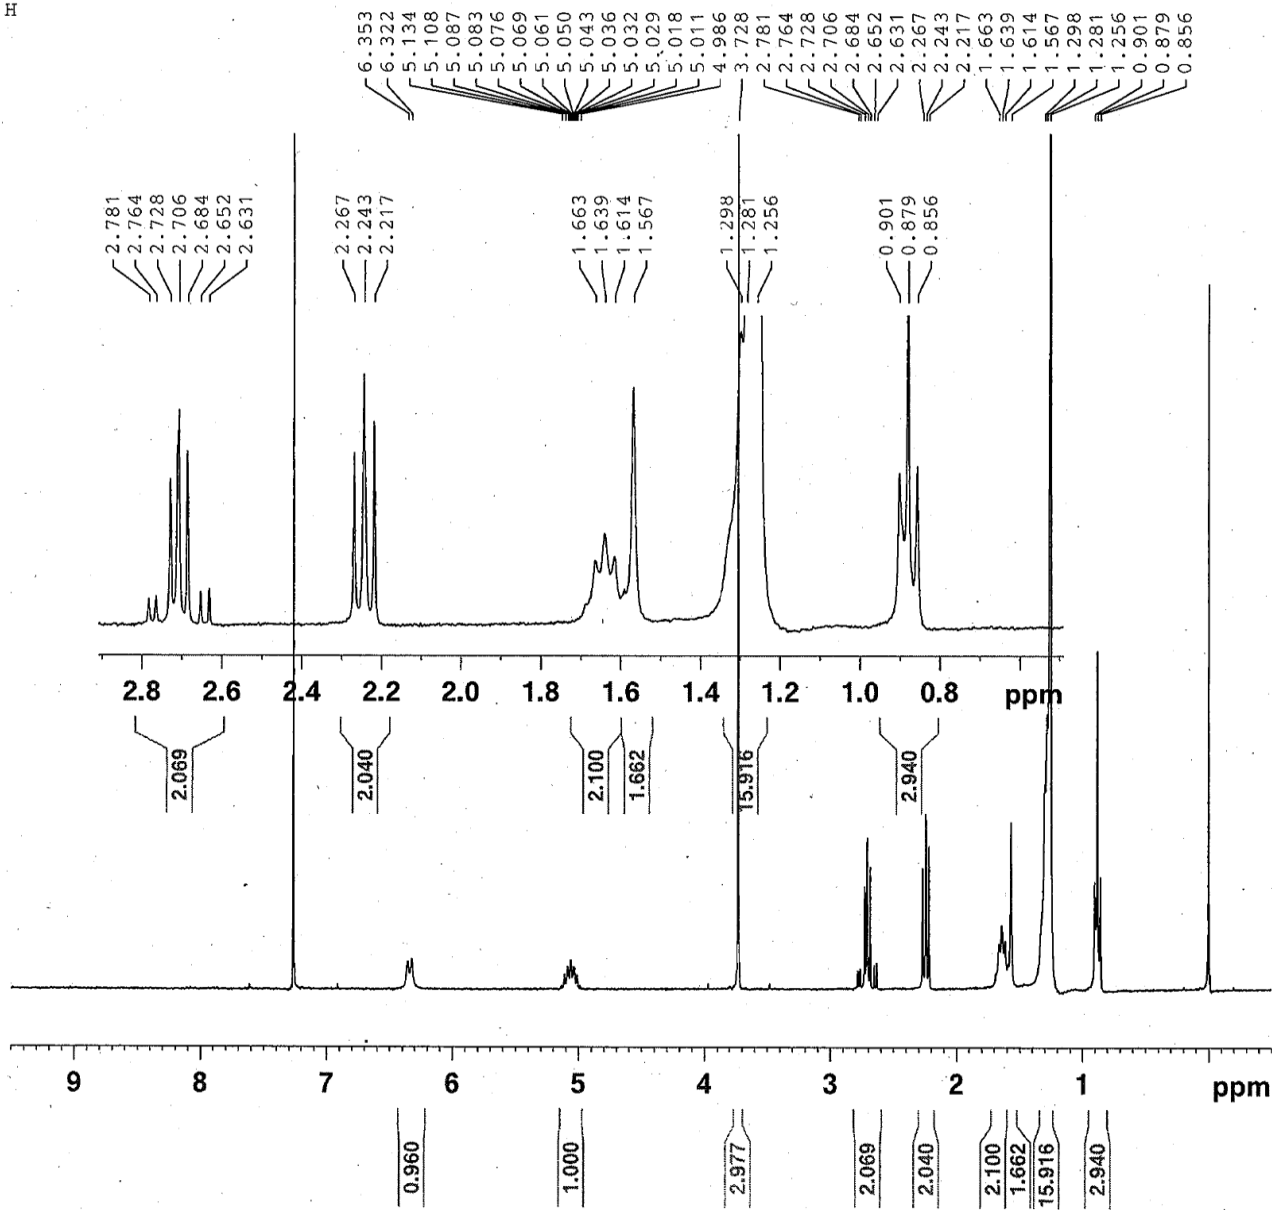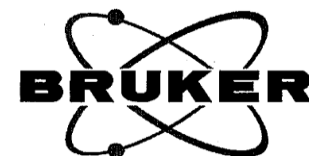

NAME A16mc211rk  
 EXPNO 17061304  
 PROCNO 1  
 Date\_ 20170613  
 Time 11.40  
 INSTRUM spect  
 PROBHD 5 mm PABBO BB-  
 PULPROG zg30  
 TD 65536  
 SOLVENT CDCl3  
 NS 8  
 DS 2  
 SWH 6188.119 Hz  
 FIDRES 0.094423 Hz  
 AQ 5.2953587 sec  
 RG 203  
 DW 80.800 usec  
 DE 6.50 usec  
 TE 296.0 K  
 D1 1.00000000 sec  
 TD0 1

===== CHANNEL f1 =====  
 NUC1 1H  
 P1 15.00 usec  
 PL1 1.20 dB  
 PL1W 8.19348145 W  
 SFO1 300.1318534 MHz  
 SI 32768  
 SF 300.1300054 MHz  
 WDW EM  
 SSB 0  
 LB 0.30 Hz  
 GB 0  
 PC 1.00

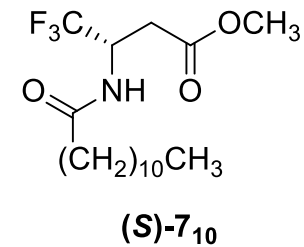

! with dec. CPD

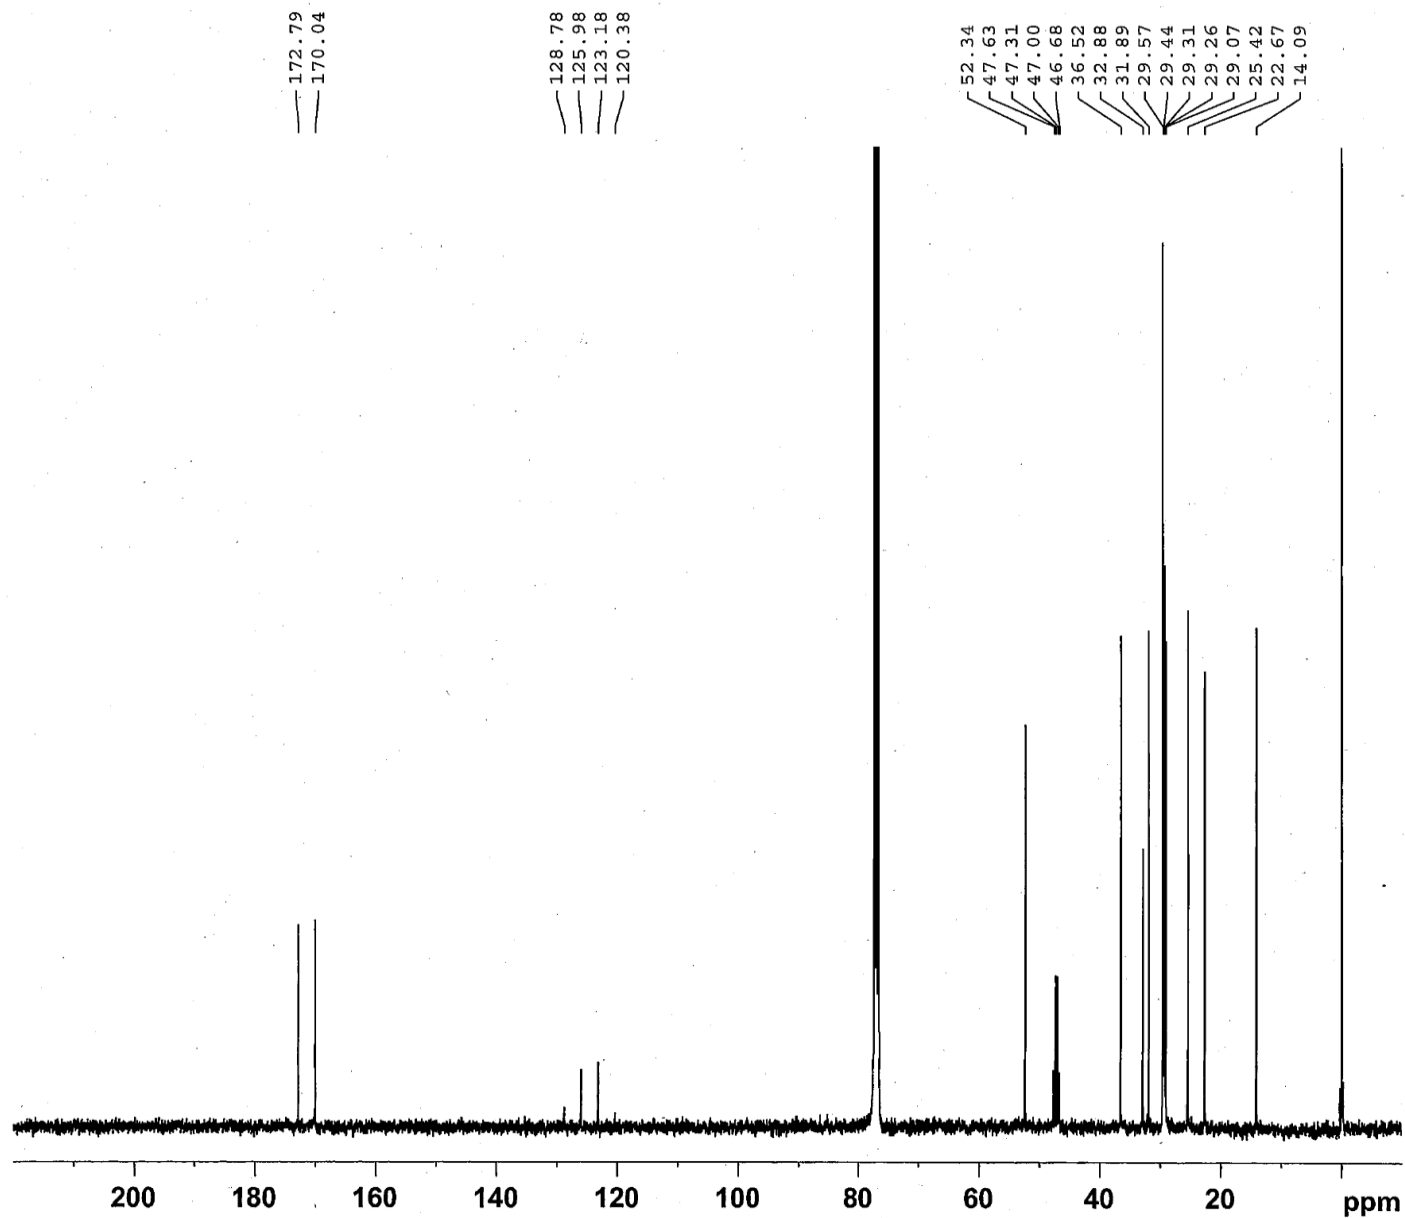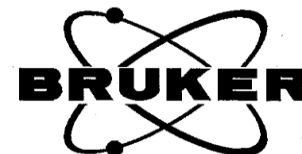

NAME kodama  
EXPNO 2  
PROCNO 1  
Date\_ 20170912  
Time\_ 16.45  
INSTRUM spect  
PROBHD 5 mm CPQNP 1H/  
PULPROG zgpg30  
TD 65536  
SOLVENT CDCl3  
NS 493  
DS 2  
SWH 29761.904 Hz  
FIDRES 0.454131 Hz  
AQ 1.1010548 sec  
RG 126.99  
DW 16.800 usec  
DE 18.00 usec  
TE 300.0 K  
D1 2.00000000 sec  
D11 0.03000000 sec  
TD0 1

==== CHANNEL f1 =====  
NUC1 13C  
P1 12.00 usec  
SI 32768  
SF 100.6127690 MHz  
WDW EM  
SSB 0  
LB 2.00 Hz  
GB 0  
PC 1.40

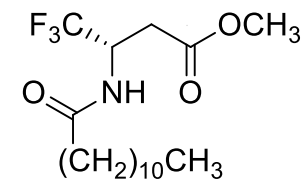



- ACCEPTANCE - System: AV300 OrderNo.: JH033009 Customer: Saitama University Engineer: IKD  
 P/N Console: Z108356/162 Shim system: BOSS I original dataset: 104275\_0150snf 3 1  
 Probe: 5 mm PABBO BB-1H/D Z-GRD Z104275/0150 Sample depth:20 Gas: air  
 Sensitivity test for 19F (additional test); Sample: 0,05% TFT in CDCl3 (P/N: Z10234)  
 Sino= 243:1 ( signal= -61 - -65 ppm noise= -59.08 - -60.08 ppm [1 ppm] noise range= 4.5 ppm )  
 P1= 15usec PL1= -0.3dB

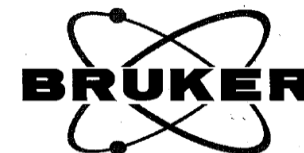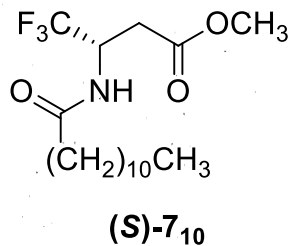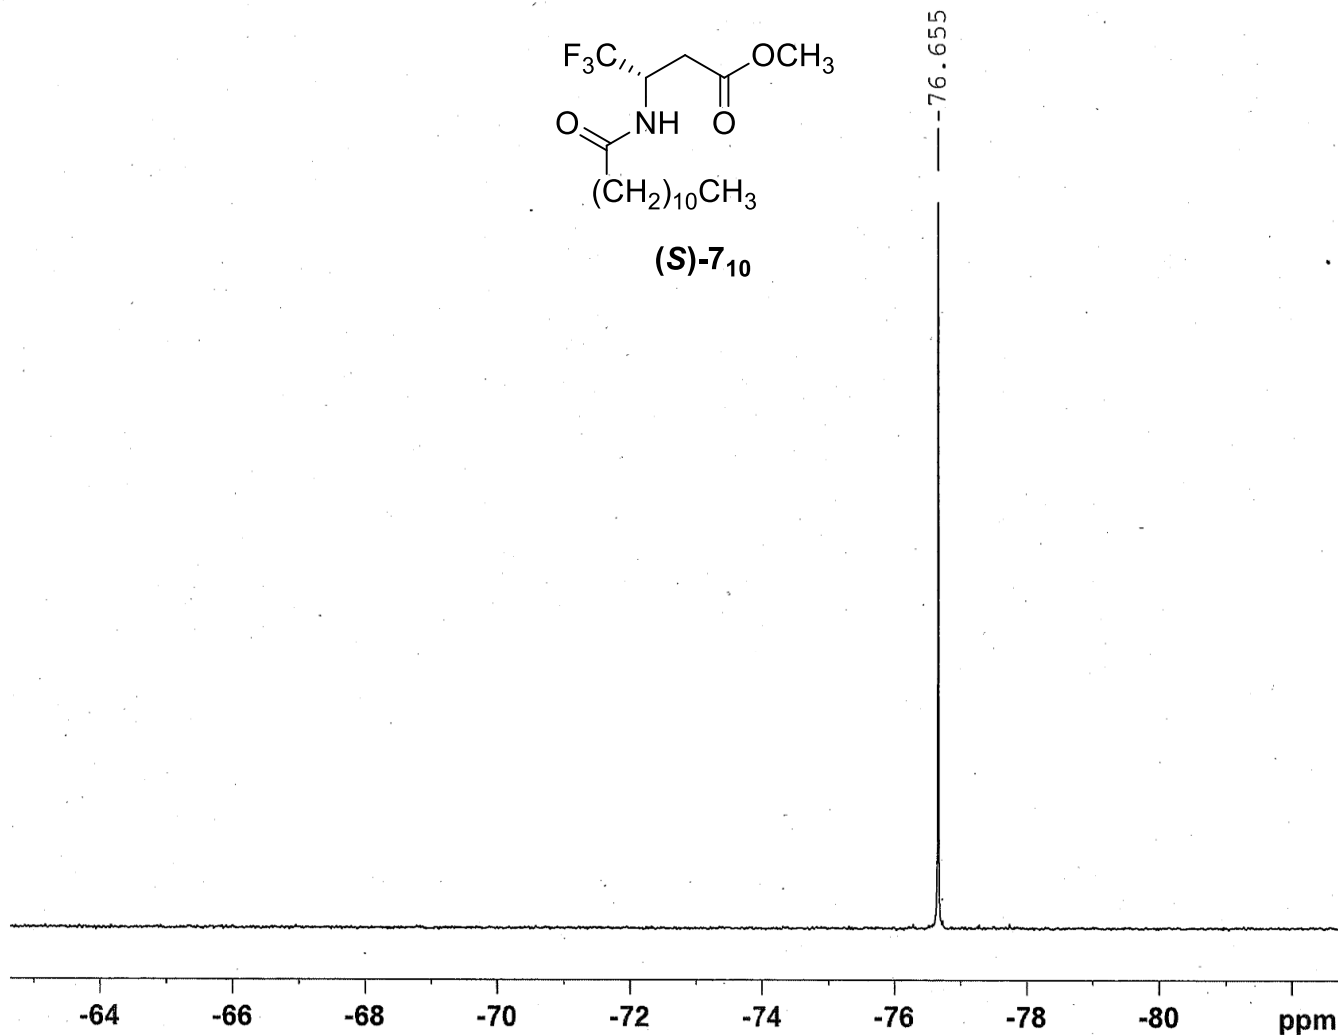

|         |                 |
|---------|-----------------|
| NAME    | A16mc211rk      |
| EXPNO   | 17061302        |
| PROCNO  | 1               |
| Date_   | 20170613        |
| Time    | 11.33           |
| INSTRUM | spect           |
| PROBHD  | 5 mm PABBO BB-  |
| PULPROG | zgfhigqn        |
| TD      | 32768           |
| SOLVENT | CDCl3           |
| NS      | 1               |
| DS      | 0               |
| SWH     | 12019.230 Hz    |
| FIDRES  | 0.366798 Hz     |
| AQ      | 1.3631988 sec   |
| RG      | 203             |
| DW      | 41.600 usec     |
| DE      | 6.50 usec       |
| TE      | 296.0 K         |
| D1      | 10.00000000 sec |
| D11     | 0.03000000 sec  |
| D12     | 0.00002000 sec  |
| TD0     | 1               |

==== CHANNEL f1 =====

|      |                 |
|------|-----------------|
| NUC1 | 19F             |
| P1   | 15.00 usec      |
| PL1  | -0.30 dB        |
| PL1W | 10.09325600 W   |
| SFO1 | 282.3865635 MHz |

==== CHANNEL f2 =====

|         |                 |
|---------|-----------------|
| CPDPRG2 | waltz16         |
| NUC2    | 1H              |
| PCPD2   | 80.00 usec      |
| PL2     | 0.58 dB         |
| PL12    | 16.50 dB        |
| PL2W    | 9.45079708 W    |
| PL12W   | 0.24180678 W    |
| SFO2    | 300.1300000 MHz |
| SI      | 16384           |
| SF      | 282.4046286 MHz |
| WDW     | EM              |
| SSB     | 0               |
| LB      | 2.00 Hz         |
| GB      | 0               |
| PC      | 1.00            |

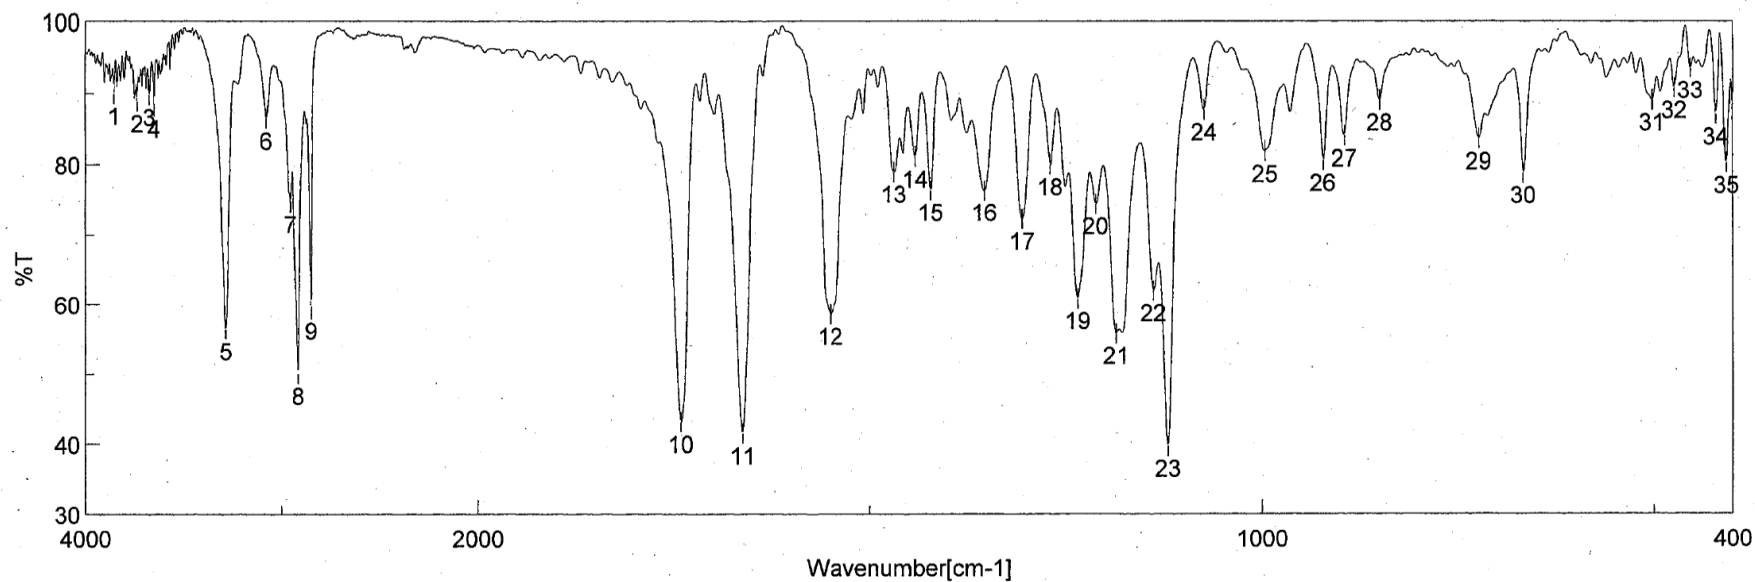

積算回数 16  
 ゼロフィリング ON  
 ゲイン 8  
 測定日時 2016/11/22 14:06  
 測定者 kawamata  
 ファイル名 Memory#2  
 サンプル名 s-10-c12  
 コメント

分解 4 cm-1  
 アポダイゼーション Cosine  
 スキャンスピード 2 mm/sec  
 更新日時 2016/11/22 14:08

|              |       |              |       |              |       |              |       |
|--------------|-------|--------------|-------|--------------|-------|--------------|-------|
| 1: 3853.08,  | 89.96 | 2: 3734.48,  | 88.90 | 3: 3673.73,  | 89.82 | 4: 3648.66,  | 88.17 |
| 5: 3285.14,  | 56.42 | 6: 3077.83,  | 86.46 | 7: 2955.38,  | 74.71 | 8: 2916.81,  | 50.01 |
| 9: 2850.27,  | 59.35 | 10: 1741.41, | 43.15 | 11: 1662.34, | 41.54 | 12: 1550.49, | 58.62 |
| 13: 1468.53, | 79.00 | 14: 1441.53, | 81.13 | 15: 1421.28, | 76.37 | 16: 1352.82, | 76.34 |
| 17: 1304.61, | 72.24 | 18: 1268.93, | 80.07 | 19: 1234.22, | 60.83 | 20: 1211.08, | 74.39 |
| 21: 1185.04, | 55.85 | 22: 1137.80, | 61.98 | 23: 1119.48, | 39.75 | 24: 1073.19, | 87.68 |
| 25: 996.05,  | 81.89 | 26: 921.81,  | 80.63 | 27: 894.81,  | 84.02 | 28: 849.49,  | 89.04 |
| 29: 723.18,  | 83.61 | 30: 666.29,  | 78.84 | 31: 502.37,  | 89.03 | 32: 474.40,  | 90.75 |
| 33: 454.15,  | 93.57 | 34: 421.37,  | 87.00 | 35: 407.87,  | 80.24 |              |       |

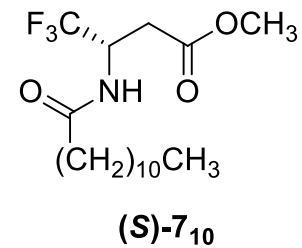

1H

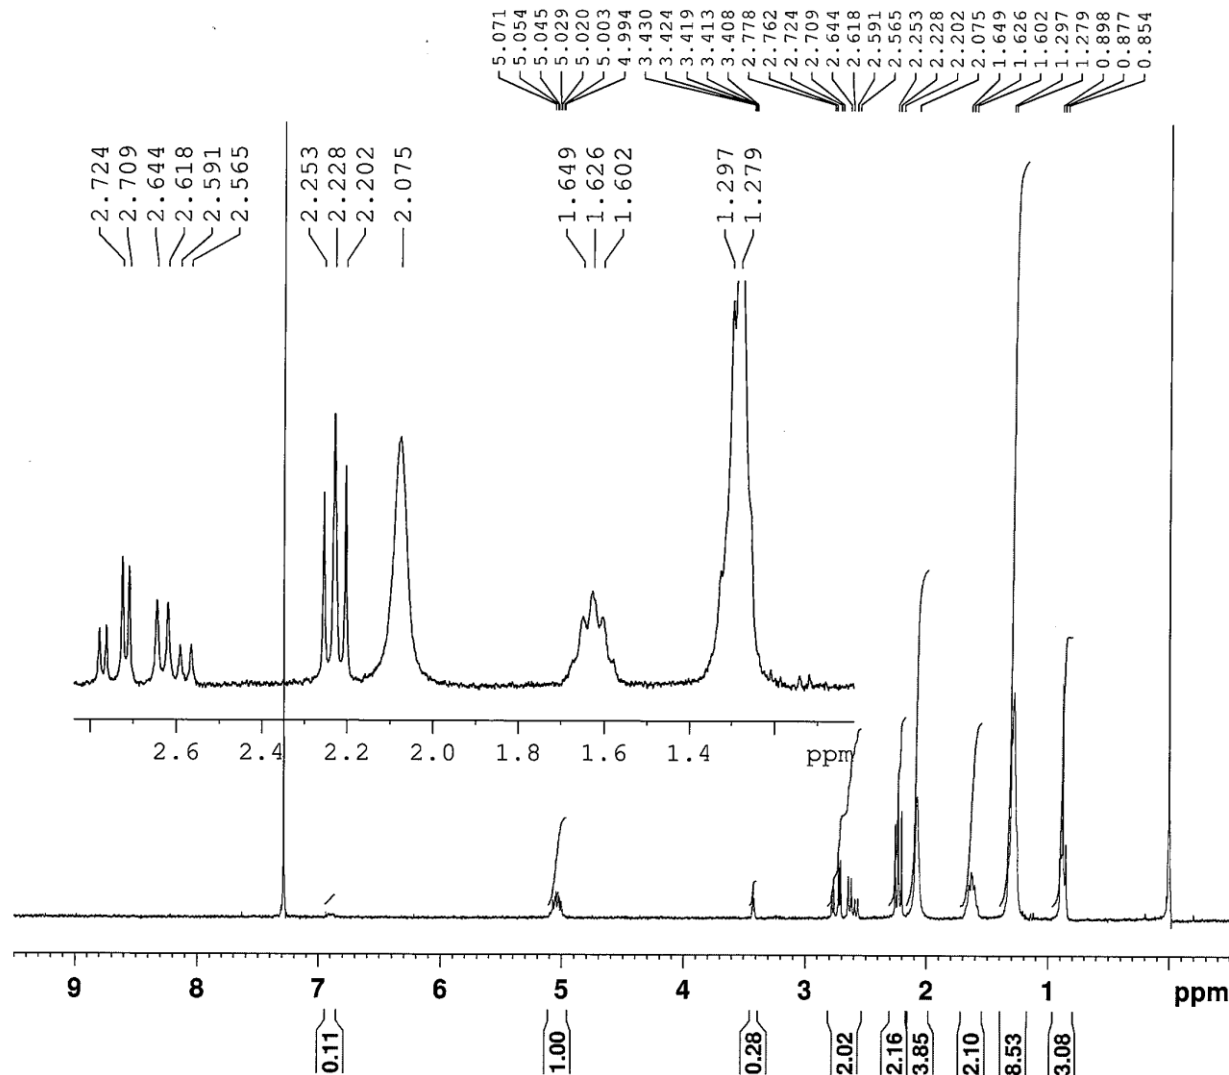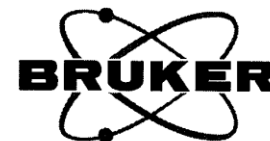

Current Data Parameters  
 NAME A12ta020rk  
 EXPNO 16021801  
 PROCNO 1

F2 - Acquisition Parameters  
 Date\_ 20160218  
 Time 9.39  
 INSTRUM spect  
 PROBHD 5 mm PABBO BB-  
 PULPROG zg30  
 TD 65536  
 SOLVENT CDC13  
 NS 8  
 DS 2  
 SWH 6188.119 Hz  
 FIDRES 0.094423 Hz  
 AQ 5.2953587 sec  
 RG 203  
 DW 80.800 usec  
 DE 6.50 usec  
 TE 297.7 K  
 D1 1.00000000 sec  
 TD0 1

==== CHANNEL f1 =====  
 NUC1 1H  
 P1 15.00 usec  
 PL1 1.20 dB  
 PL1W 8.19348145 W  
 SFO1 300.1318534 MHz

F2 - Processing parameters  
 SI 32768  
 SF 300.1299978 MHz  
 WDW EM  
 SSB 0  
 LB 0.30 Hz  
 GB 0  
 PC 1.00

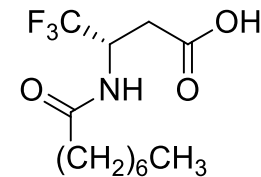

! with dec. CPQ

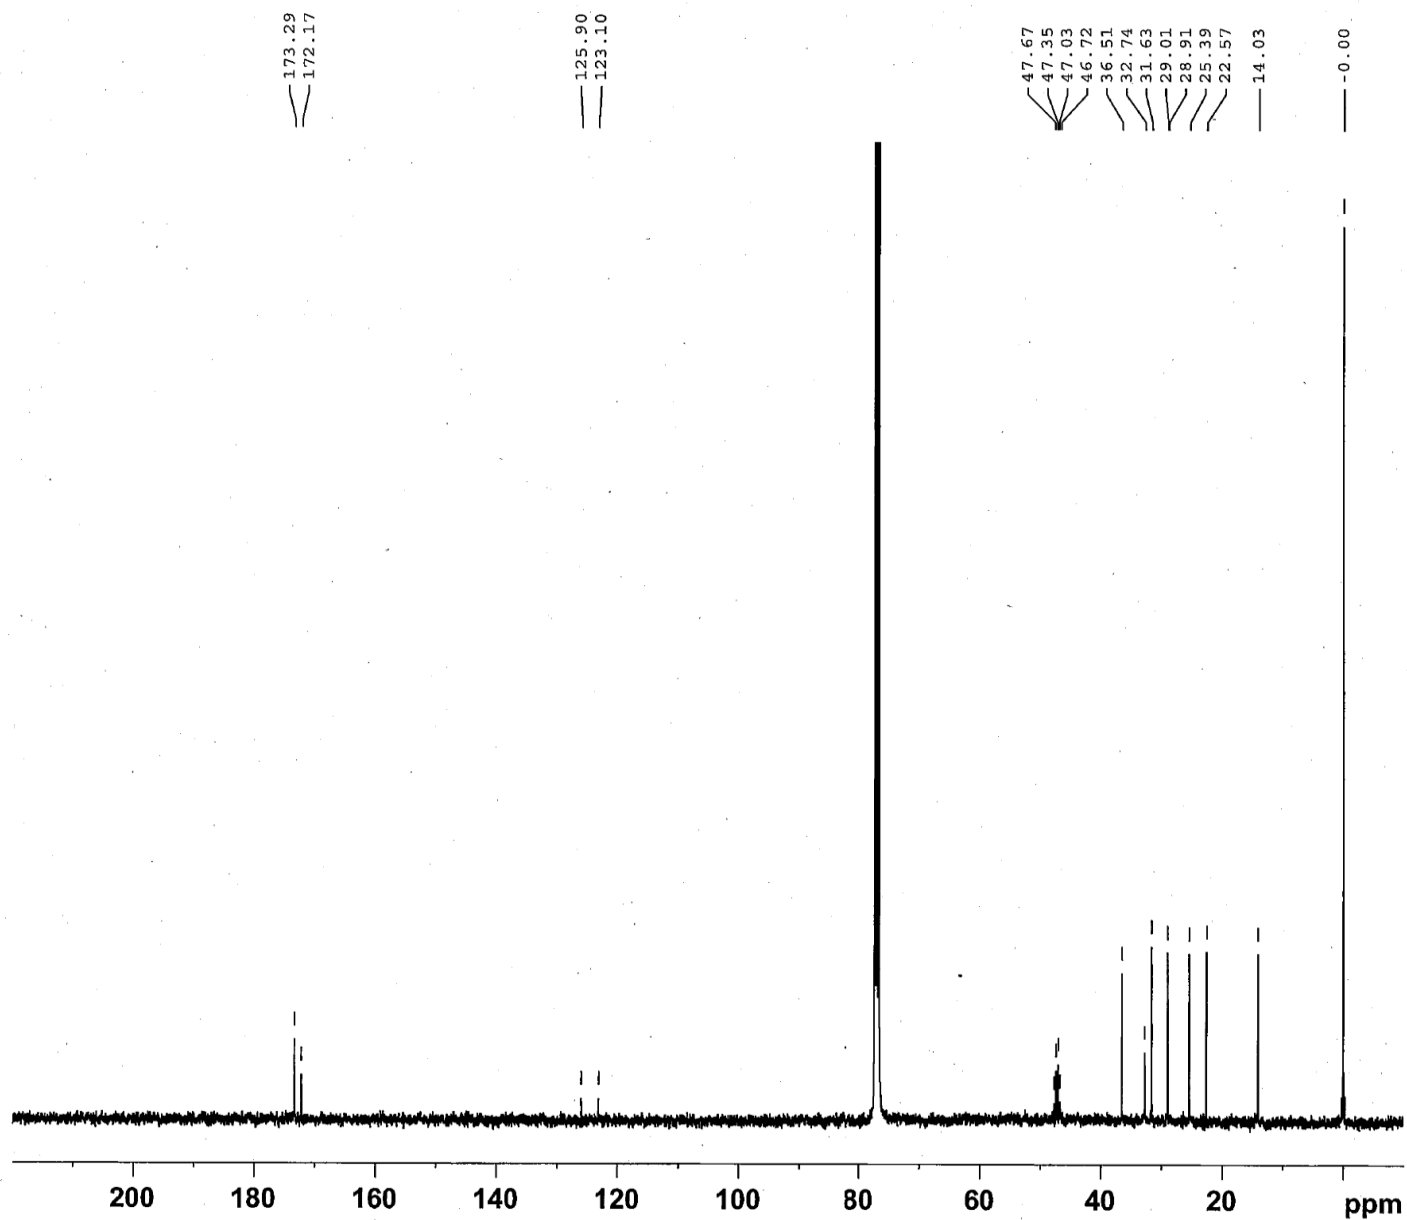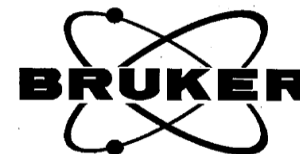

NAME kodama  
EXPNO 1  
PROCNO 1  
Date\_ 20170912  
Time\_ 16.13  
INSTRUM spect  
PROBHD 5 mm CPQNP 1H/  
PULPROG zgpg30  
TD 65536  
SOLVENT CDCl3  
NS 512  
DS 2  
SWH 29761.904 Hz  
FIDRES 0.454131 Hz  
AQ 1.1010548 sec  
RG 126.99  
DW 16.800 usec  
DE 18.00 usec  
TE 300.0 K  
D1 2.00000000 sec  
D11 0.03000000 sec  
TD0 1

==== CHANNEL f1 =====  
NUC1 13C  
P1 12.00 usec  
SI 32768  
SF 100.6127674 MHz  
WDW EM  
SSB 0  
LB 2.00 Hz  
GB 0  
PC 1.40

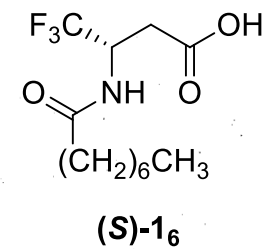

- ACCEPTANCE - System: AV300 OrderNo.: JH033009 Customer: Saitama University Engineer: IKD  
 P/N Console: Z108356/162 Shim system: BOSS I original dataset: 104275\_0150snf 3 1  
 Probe: 5 mm PABBO BB-1H/D Z-GRD Z104275/0150 Sample depth:20 Gas: air  
 Sensitivity test for 19F (additional test); Sample: 0,05% TFT in CDC13 (P/N: Z10234)  
 Sino= 243:1 ( signal= -61 - -65 ppm noise= -59.08 - -60.08 ppm [1 ppm] noise range= 4.5 ppm )  
 P1= 15usec PL1= -0.3dB

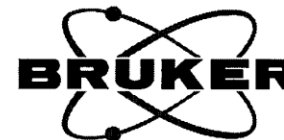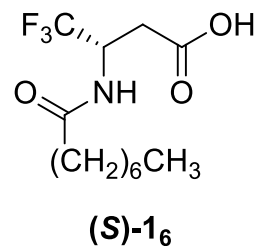

---77.047

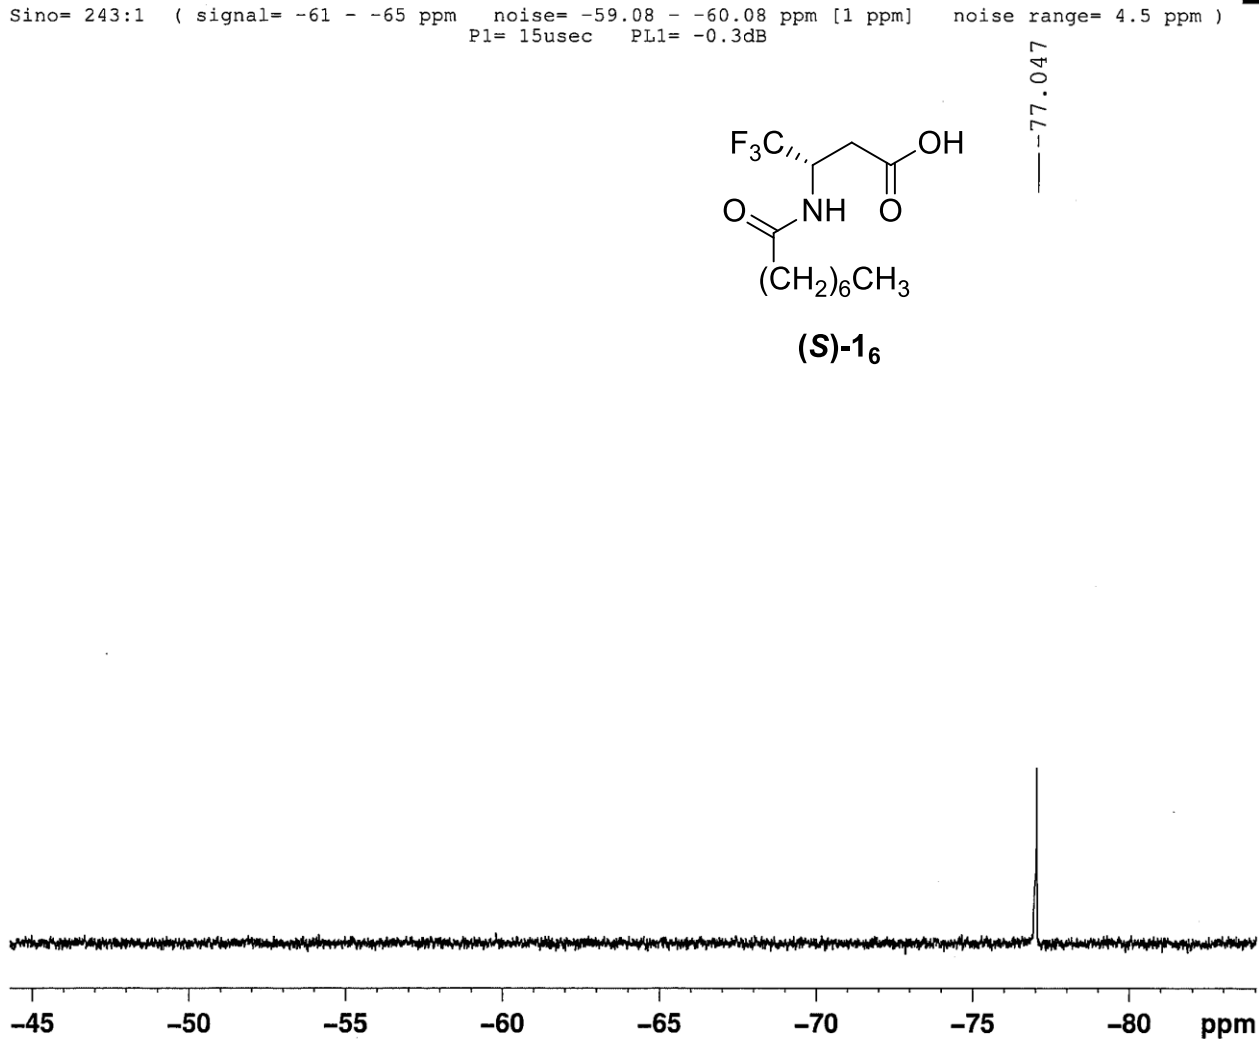

Current Data Parameters  
 NAME A12ta020rk  
 EXPNO 16020505  
 PROCNO 2

F2 - Acquisition Parameters  
 Date\_ 20160205  
 Time 13.47  
 INSTRUM spect  
 PROBHD 5 mm PABBO BB-  
 PULPROG zgfhigqn  
 TD 32768  
 SOLVENT CDC13  
 NS 1  
 DS 0  
 SWH 12019.230 Hz  
 FIDRES 0.366798 Hz  
 AQ 1.3631988 sec  
 RG 203  
 DW 41.600 usec  
 DE 6.50 usec  
 TE 297.3 K  
 D1 10.00000000 sec  
 D11 0.03000000 sec  
 D12 0.00002000 sec  
 TD0 1

===== CHANNEL f1 =====  
 NUC1 19F  
 P1 15.00 usec  
 PL1 -0.30 dB  
 PL1W 10.09325600 W  
 SFO1 282.3865635 MHz

===== CHANNEL f2 =====  
 CPDPRG2 waltz16  
 NUC2 1H  
 PCPD2 80.00 usec  
 PL2 0.58 dB  
 PL12 16.50 dB  
 PL2W 9.45079708 W  
 PL12W 0.24180678 W  
 SFO2 300.1300000 MHz

F2 - Processing parameters  
 SI 16384  
 SF 282.4046312 MHz  
 WDW EM  
 SSB 0  
 LB 2.00 Hz  
 GB 0  
 PC 1.00

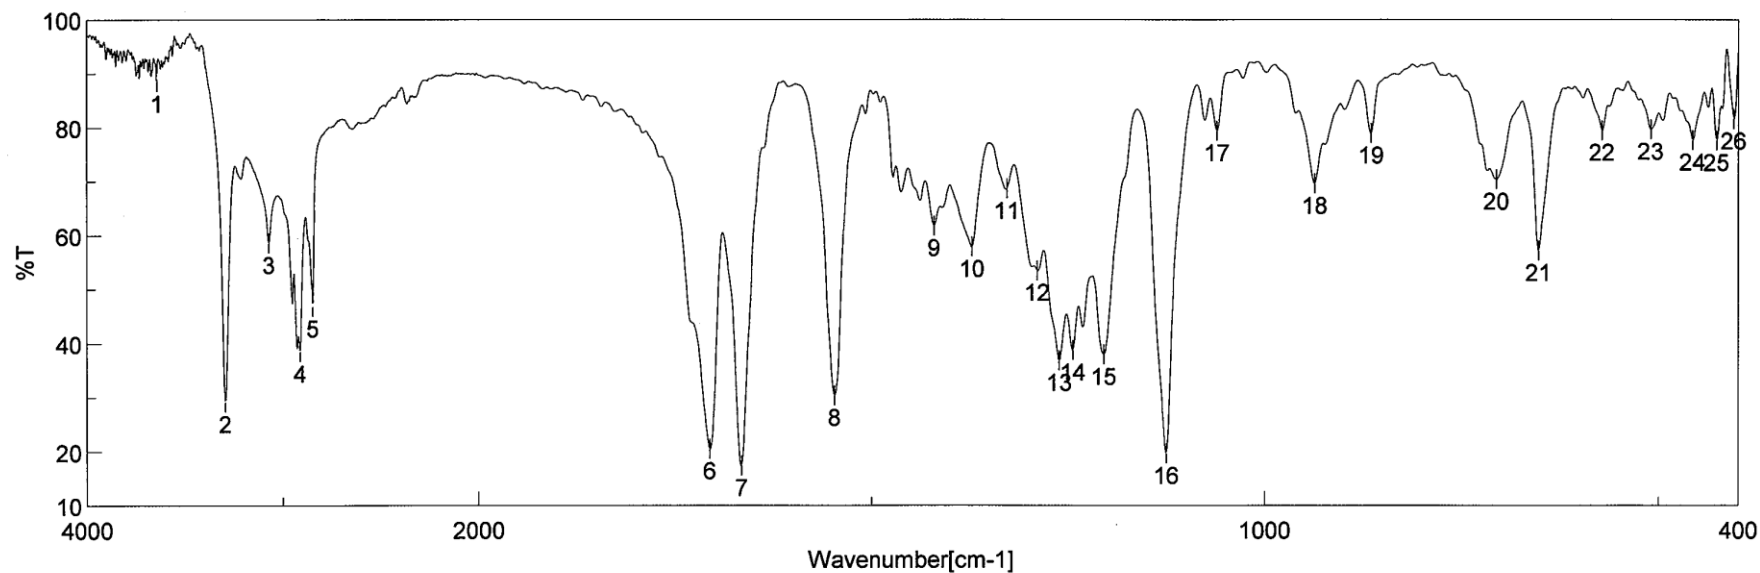

積算回数  
ゼロフィリング  
ゲイン  
測定日時  
測定者  
ファイル名  
サンプル名  
コメント

16  
ON  
16  
2016/02/28 15:54  
kawamata  
Memory#2  
(S)-1-C8

分解  
アポダイゼーション  
スキャンスピード  
更新日時

4 cm-1  
Cosine  
2 mm/sec  
2016/02/28 15:55

|              |       |              |       |              |       |              |       |
|--------------|-------|--------------|-------|--------------|-------|--------------|-------|
| 1: 3648.66,  | 88.58 | 2: 3296.71,  | 29.21 | 3: 3074.94,  | 58.62 | 4: 2913.91,  | 38.53 |
| 5: 2849.31,  | 46.86 | 6: 1706.69,  | 20.56 | 7: 1666.20,  | 17.41 | 8: 1547.59,  | 30.44 |
| 9: 1420.32,  | 61.82 | 10: 1372.10, | 57.95 | 11: 1327.75, | 68.73 | 12: 1289.18, | 53.55 |
| 13: 1261.22, | 36.90 | 14: 1243.86, | 38.83 | 15: 1204.33, | 38.01 | 16: 1125.26, | 19.71 |
| 17: 1060.66, | 79.47 | 18: 936.27,  | 69.67 | 19: 864.92,  | 78.99 | 20: 705.82,  | 70.43 |
| 21: 651.82,  | 57.22 | 22: 570.83,  | 79.54 | 23: 510.08,  | 79.71 | 24: 458.01,  | 77.74 |
| 25: 428.12,  | 77.62 | 26: 405.94,  | 81.68 |              |       |              |       |

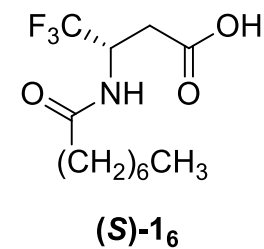

1H

6.287  
6.268

5.147  
5.132  
5.117  
5.107  
5.102  
5.098  
5.088  
5.073  
5.058

2.833  
2.823  
2.800  
2.790  
2.716  
2.702  
2.684  
2.669  
2.267  
2.252  
2.236  
2.175  
1.637  
1.622  
1.607  
1.308  
1.290  
1.283  
1.268  
0.890  
0.877  
0.863

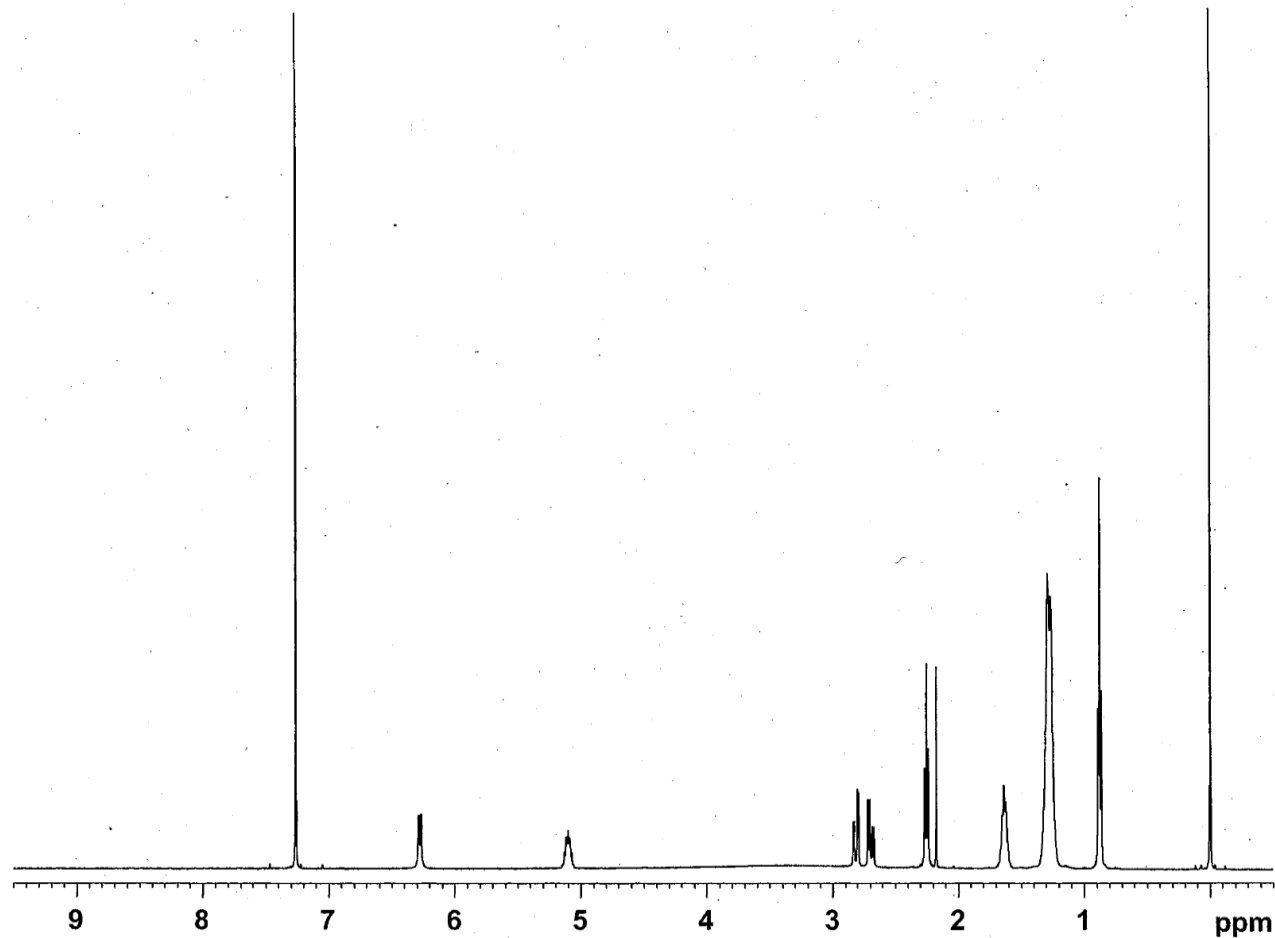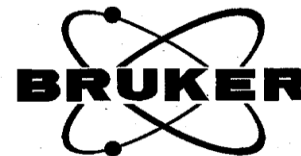

NAME A16mc211rk  
 EXPNO 17091203  
 PROCNO 1  
 Date\_ 20170912  
 Time 18.05  
 INSTRUM spect  
 PROBHD 5 mm PABBO BB-  
 PULPROG zg30  
 TD 65536  
 SOLVENT CDCl3  
 NS 8  
 DS 2  
 SWH 10330.578 Hz  
 FIDRES 0.157632 Hz  
 AQ 3.1719923 sec  
 RG 203  
 DW 48.400 usec  
 DE 6.50 usec  
 TE 300.5 K  
 D1 1.00000000 sec  
 TD0 1

==== CHANNEL f1 =====  
 NUC1 1H  
 P1 11.80 usec  
 PL1 2.40 dB  
 PL1W 15.17711735 W  
 SFO1 500.0330885 MHz  
 SI 32768  
 SF 500.0300108 MHz  
 WDW EM  
 SSB 0  
 LB 0.30 Hz  
 GB 0  
 PC 1.00

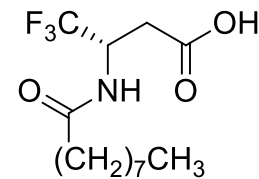

13C with dec. CPQNP

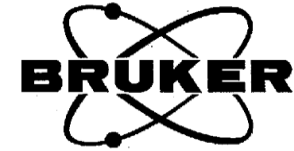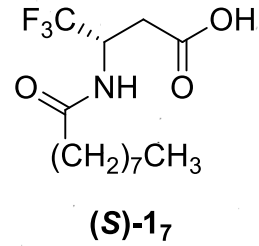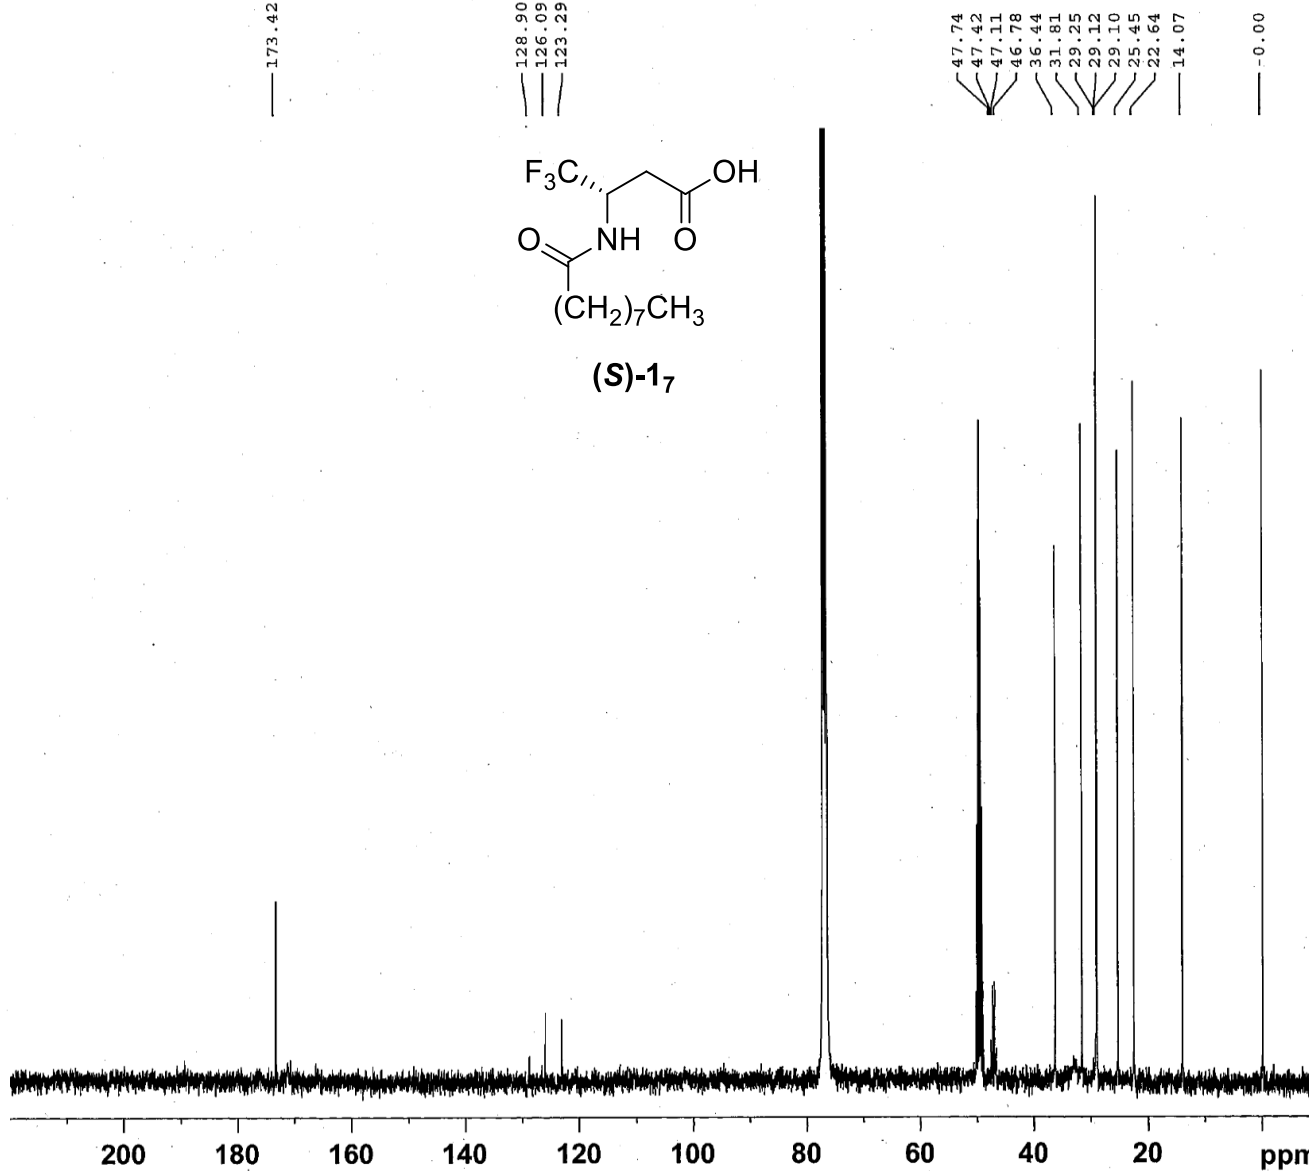

Current Data Parameters  
 NAME kodama  
 EXPNO 11  
 PROCNO 1

F2 - Acquisition Parameters  
 Date 20170914  
 Time 20.01  
 INSTRUM spect  
 PROBHD 5 mm CPQNP 1H/  
 PULPROG zgpg30  
 TD 65536  
 SOLVENT CDCl3  
 NS 1037  
 DS 2  
 SWH 29761.904 Hz  
 FIDRES 0.454131 Hz  
 AQ 1.1010548 sec  
 RG 126.99  
 DW 16.800 usec  
 DE 18.00 usec  
 TE 300.0 K  
 D1 2.00000000 sec  
 D11 0.03000000 sec  
 TD0 1

==== CHANNEL f1 =====  
 NUC1 13C  
 P1 12.00 usec  
 PLW1 15.50000000 W  
 SFO1 100.6248425 MHz

==== CHANNEL f2 =====  
 CPDPRG2 waltz16  
 NUC2 1H  
 PCPD2 90.00 usec  
 PLW2 5.19999981 W  
 PLW12 0.14444000 W  
 PLW13 0.11700000 W  
 SFO2 400.1316005 MHz

F2 - Processing parameters  
 SI 32768  
 SF 100.6127643 MHz  
 WDW EM  
 SSB 0  
 LB 2.00 Hz  
 GB 0  
 PC 1.40



- ACCEPTANCE - System: AV300 OrderNo.: JH033009 Customer: Saitama University Engineer: IKD  
 P/N Console: Z108356/162 Shim system: BOSS I original dataset: 104275\_0150snf 3 1  
 Probe: 5 mm PABBO BB-1H/D Z-GRD Z104275/0150 Sample depth:20 Gas: air  
 Sensitivity test for 19F (additional test); Sample: 0,05% TFT in CDCl3 (P/N: Z10234)

Sino= 243:1 ( signal= -61 - -65 ppm noise= -59.08 - -60.08 ppm [1 ppm] noise range= 4.5 ppm )  
 P1= 15usec PL1= -0.3dB

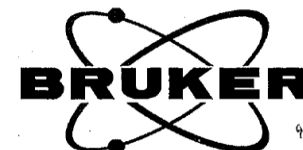

NAME A16mc211rk  
 EXPNO 16101102  
 PROCNO 1  
 Date\_ 20161011  
 Time 12.47  
 INSTRUM spect  
 PROBHD 5 mm PABBO BB-  
 PULPROG zgfhigqn  
 TD 32768  
 SOLVENT CDCl3  
 NS 1  
 DS 0  
 SWH 12019.230 Hz  
 FIDRES 0.366798 Hz  
 AQ 1.3631988 sec  
 RG 203  
 DW 41.600 usec  
 DE 6.50 usec  
 TE 296.3 K  
 D1 10.00000000 sec  
 D11 0.03000000 sec  
 D12 0.00002000 sec  
 TD0 1

===== CHANNEL f1 =====  
 NUC1 19F  
 P1 15.00 usec  
 PL1 -0.30 dB  
 PL1W 10.09325600 W  
 SFO1 282.3865635 MHz

===== CHANNEL f2 =====  
 CPDPRG2 waltz16  
 NUC2 1H  
 PCPD2 80.00 usec  
 PL2 0.58 dB  
 PL12 16.50 dB  
 PL2W 9.45079708 W  
 PL12W 0.24180678 W  
 SFO2 300.1300000 MHz  
 SI 16384  
 SF 282.4046280 MHz  
 WDW EM  
 SSB 0  
 LB 2.00 Hz  
 GB 0  
 PC 1.00

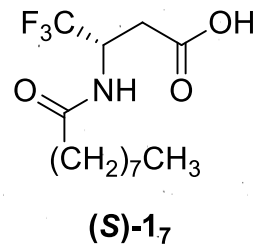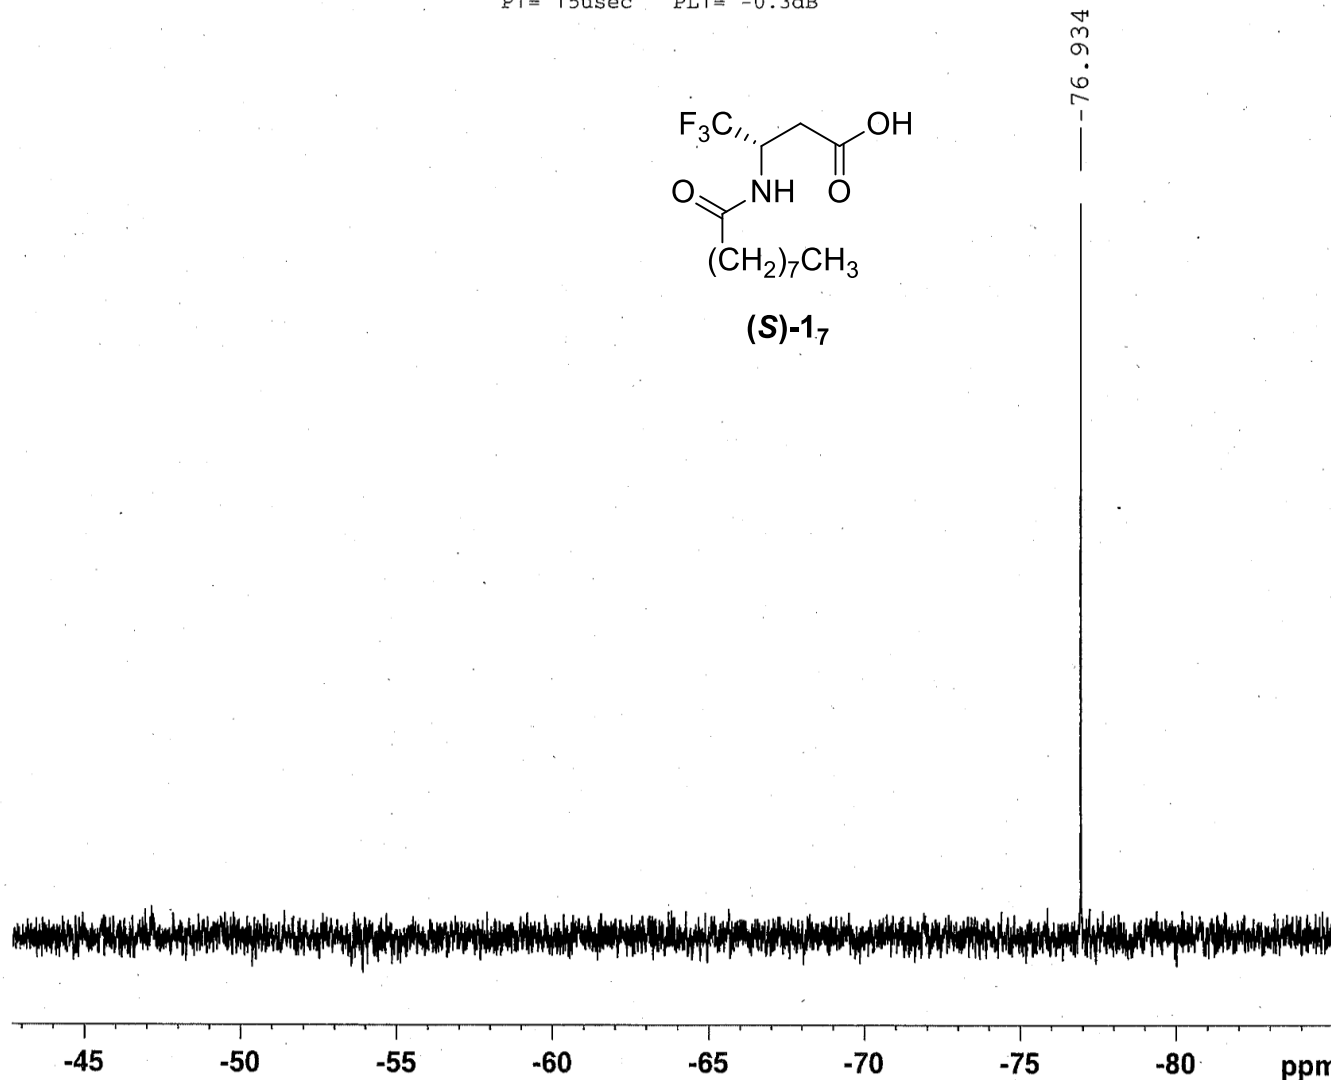

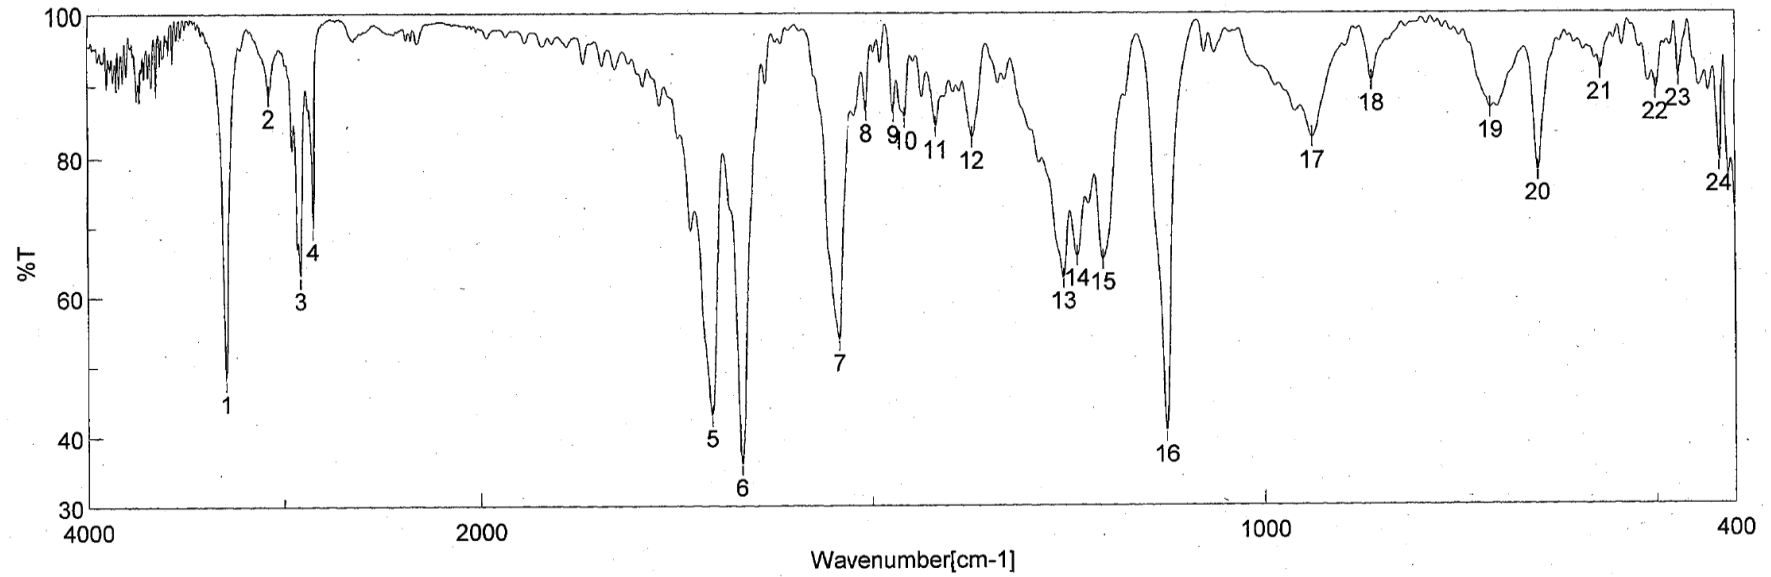

積算回数  
ゼロフィリング  
ゲイン  
測定日時  
測定者  
ファイル名  
サンプル名  
コメント

16  
ON  
16  
2016/11/22 14:42  
kawata  
Memory#2  
s-F9

分解  
アポダイゼーション  
スキャンスピード  
更新日時

4 cm-1  
Cosine  
2 mm/sec  
2016/11/22 14:45

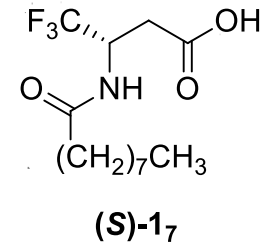

|     |          |       |     |          |       |     |          |       |     |          |       |
|-----|----------|-------|-----|----------|-------|-----|----------|-------|-----|----------|-------|
| 1:  | 3294.79, | 47.99 | 2:  | 3074.94, | 88.66 | 3:  | 2913.91, | 62.70 | 4:  | 2849.31, | 69.78 |
| 5:  | 1704.76, | 42.92 | 6:  | 1667.16, | 35.85 | 7:  | 1542.77, | 53.64 | 8:  | 1507.10, | 86.40 |
| 9:  | 1472.38, | 86.19 | 10: | 1457.92, | 85.39 | 11: | 1418.39, | 84.12 | 12: | 1372.10, | 82.65 |
| 13: | 1255.43, | 62.50 | 14: | 1238.08, | 65.73 | 15: | 1205.29, | 65.20 | 16: | 1124.30, | 40.52 |
| 17: | 939.16,  | 82.52 | 18: | 862.99,  | 90.46 | 19: | 711.60,  | 86.57 | 20: | 650.86,  | 77.77 |
| 21: | 570.83,  | 91.90 | 22: | 500.44,  | 89.09 | 23: | 471.51,  | 90.96 | 24: | 420.41,  | 79.00 |

1H

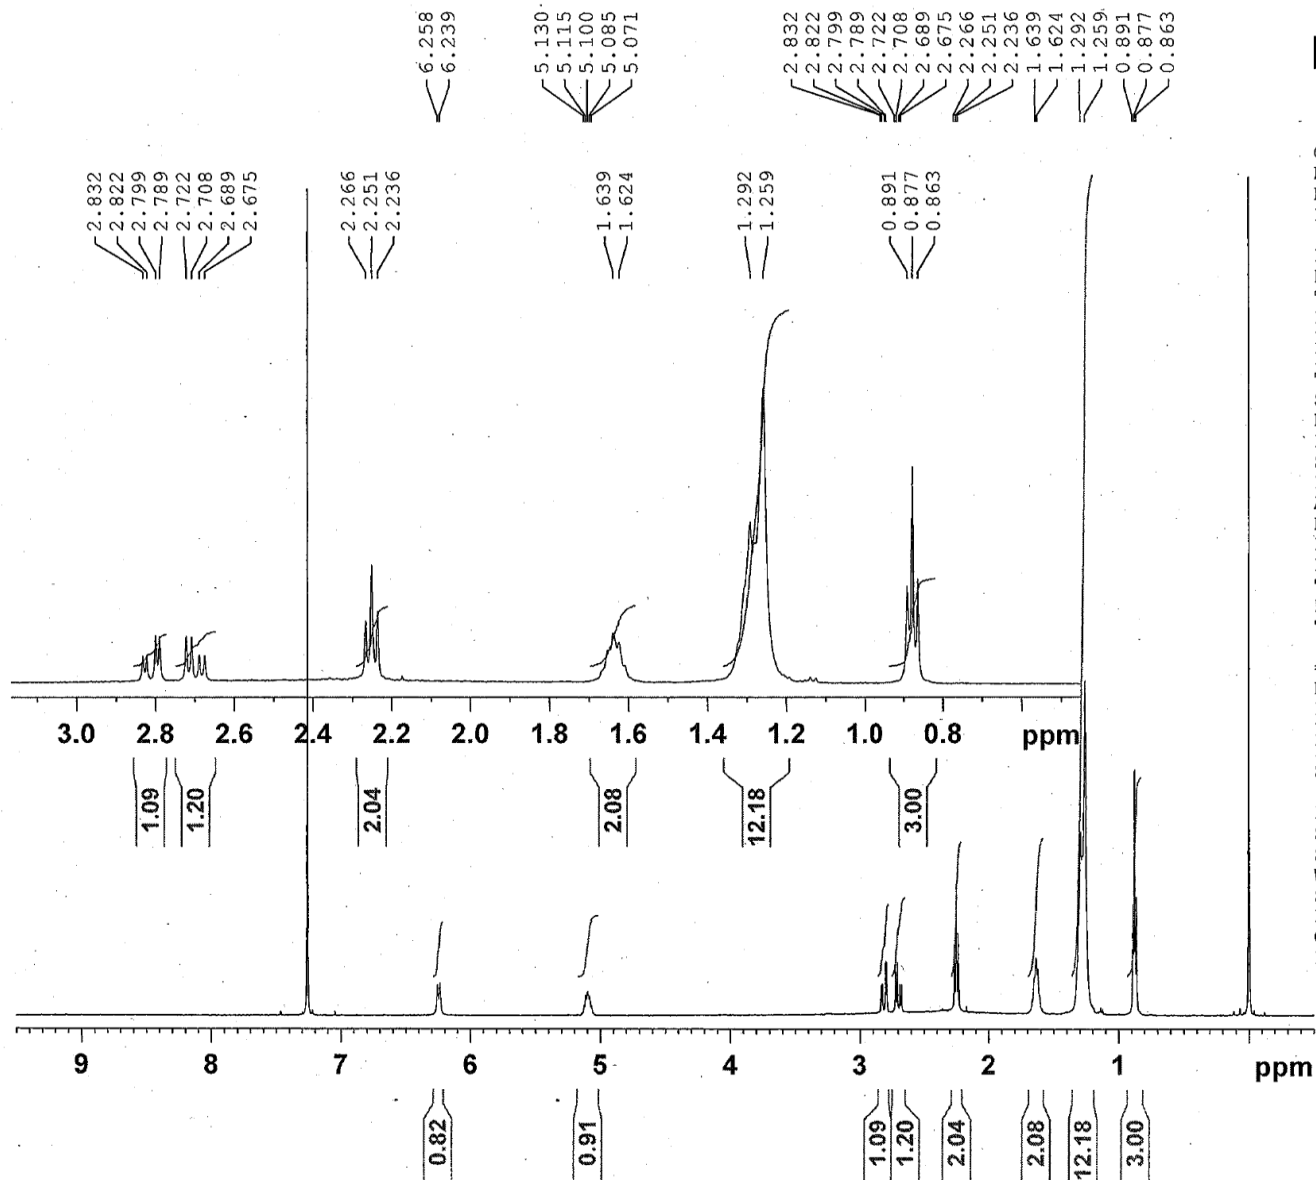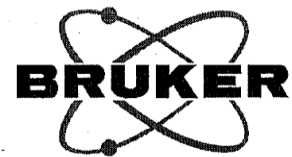

Current Data Parameters  
 NAME Al6mc211rk  
 EXPNO 17091201  
 PROCNO 1

F2 - Acquisition Parameters  
 Date\_ 20170912  
 Time\_ 16.23  
 INSTRUM spect  
 PROBHD 5 mm PABBO BB-  
 PULPROG zg30  
 TD 65536  
 SOLVENT CDCl3  
 NS 8  
 DS 2  
 SWH 10330.578 Hz  
 FIDRES 0.157632 Hz  
 AQ 3.1719923 sec  
 RG 203  
 DW 48.400 usec  
 DE 6.50 usec  
 TE 300.7 K  
 D1 1.00000000 sec  
 TD0 1

==== CHANNEL f1 =====  
 NUC1 1H  
 P1 11.80 usec  
 PL1 2.40 dB  
 PL1W 15.17711735 W  
 SF01 500.0330885 MHz

F2 - Processing parameters  
 SI 32768  
 SF 500.0300109 MHz  
 WDW EM  
 SSB 0  
 LB 0.30 Hz  
 GB 0  
 PC 1.00

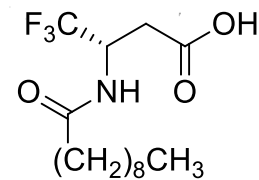

13C with dec. CPQNP

173.31  
171.51

128.86  
126.06  
123.26  
120.47

47.67  
47.35  
47.03  
46.71  
36.46  
32.78  
31.86  
29.42  
29.29  
29.25  
29.09  
25.44  
22.67  
14.09

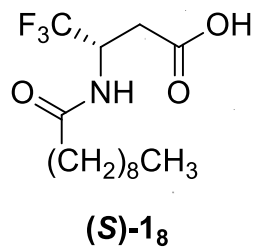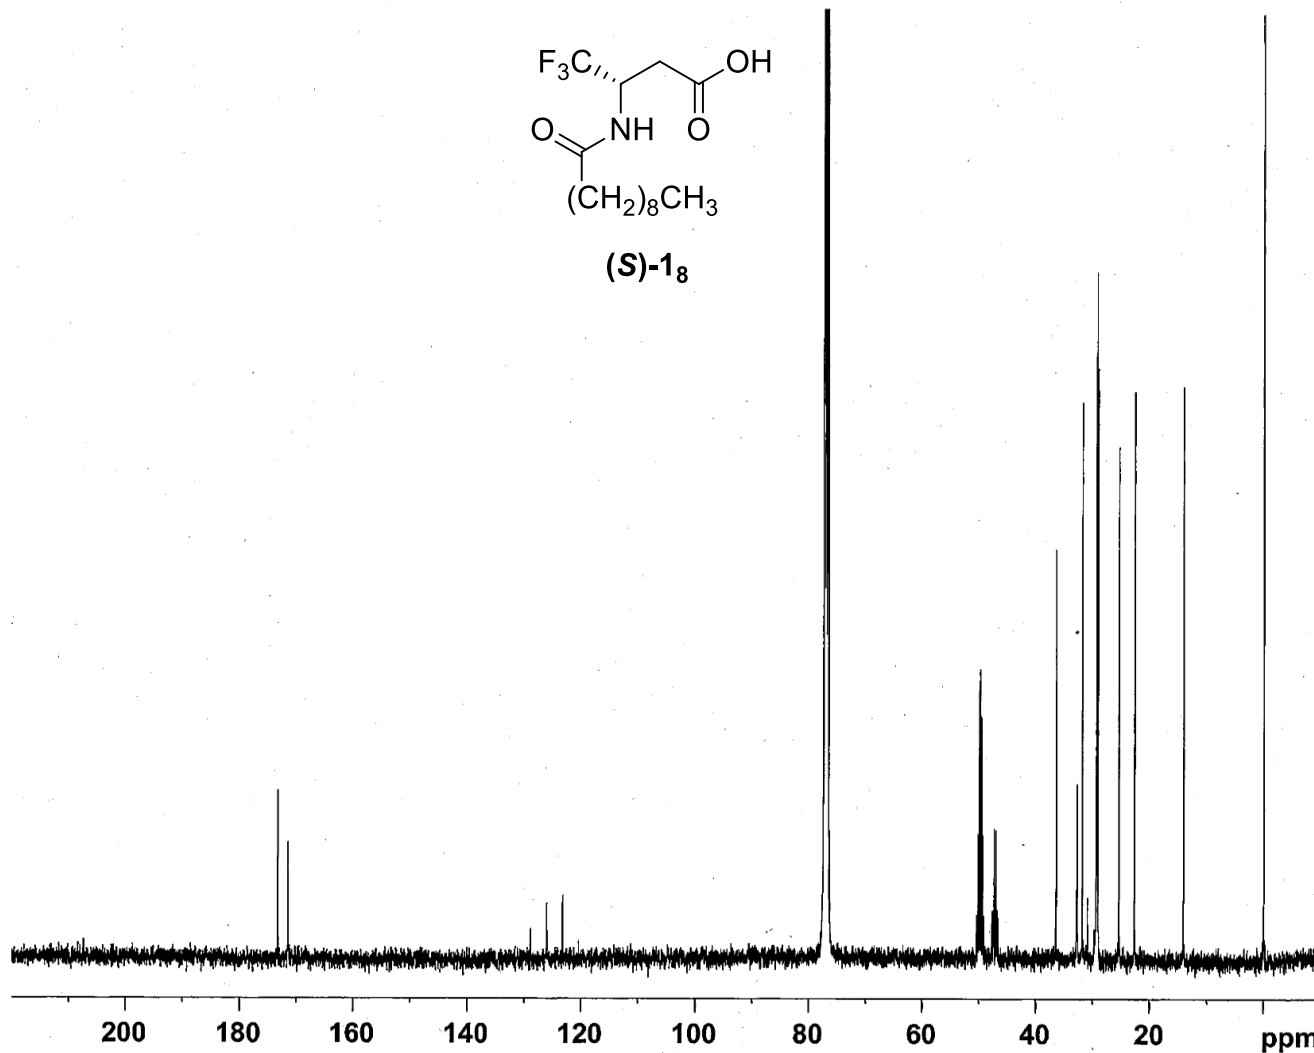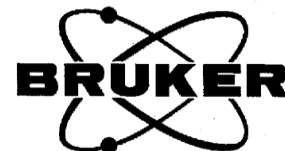

Current Data Parameters  
NAME kodama  
EXPNO 15  
PROCNO 1

F2 - Acquisition Parameters  
Date\_ 20170914  
Time\_ 23.30  
INSTRUM spect  
PROBHD 5 mm CPQNP 1H/  
PULPROG zgpg30  
TD 65536  
SOLVENT CDCl3  
NS 1027  
DS 2  
SWH 29761.904 Hz  
FIDRES 0.454131 Hz  
AQ 1.1010548 sec  
RG 126.99  
DW 16.800 usec  
DE 18.00 usec  
TE 300.0 K  
D1 2.00000000 sec  
D11 0.03000000 sec  
TDO 1

==== CHANNEL f1 =====  
NUC1 13C  
P1 12.00 usec  
PLW1 15.50000000 W  
SFO1 100.6248425 MHz

==== CHANNEL f2 =====  
CPDPRG2 waltz16  
NUC2 1H  
PCPD2 90.00 usec  
PLW2 5.19999981 W  
PLW12 0.14444000 W  
PLW13 0.11700000 W  
SFO2 400.1316005 MHz

F2 - Processing parameters  
SI 32768  
SF 100.6127654 MHz  
WDW EM  
SSB 0  
LB 2.00 Hz  
GB 0  
PC 1.40

- ACCEPTANCE - System: AV300 OrderNo.: JH033009 Customer: Saitama University Engineer: IKD  
 P/N Console: Z108356/162 Shim system: BOSS I original dataset: 104275\_0150snf 3 1  
 Probe: 5 mm PABBO BB-1H/D Z-GRD Z104275/0150 Sample depth:20 Gas: air  
 Sensitivity test for 19F (additional test); Sample: 0,05% TFT in CDCl3 (P/N: Z10234)  
 Sino= 243:1 ( signal= -61 - -65 ppm noise= -59.08 - -60.08 ppm [1 ppm] noise range= 4.5 ppm )  
 P1= 15usec PL1= -0.3dB

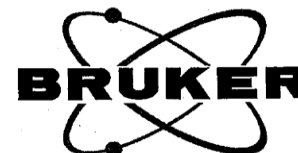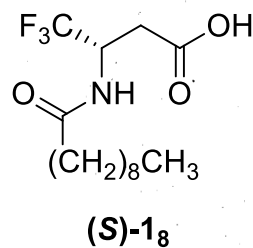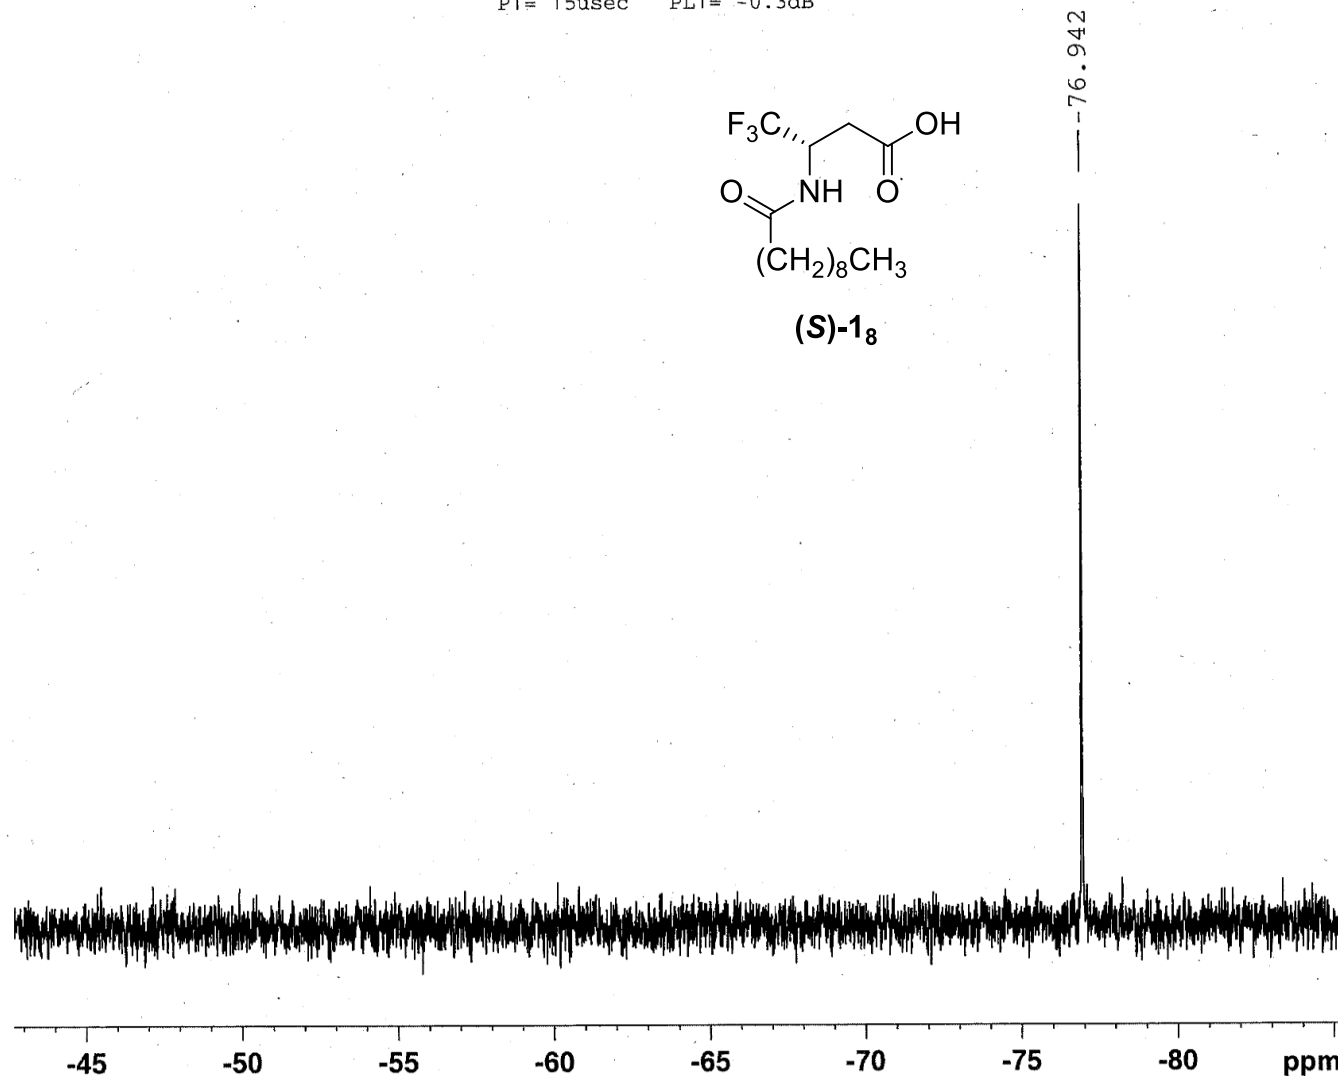

|         |                 |
|---------|-----------------|
| NAME    | A16mc211rk      |
| EXPNO   | 16101103        |
| PROCNO  | 1               |
| Date_   | 20161011        |
| Time    | 12.50           |
| INSTRUM | spect           |
| PROBHD  | 5 mm PABBO BB-  |
| PULPROG | zgfhigqn        |
| TD      | 32768           |
| SOLVENT | CDCl3           |
| NS      | 1               |
| DS      | 0               |
| SWH     | 12019.230 Hz    |
| FIDRES  | 0.366798 Hz     |
| AQ      | 1.3631988 sec   |
| RG      | 203             |
| DW      | 41.600 usec     |
| DE      | 6.50 usec       |
| TE      | 296.4 K         |
| D1      | 10.00000000 sec |
| D11     | 0.03000000 sec  |
| D12     | 0.00002000 sec  |
| TD0     | 1               |

===== CHANNEL f1 =====

|      |                 |
|------|-----------------|
| NUC1 | 19F             |
| P1   | 15.00 usec      |
| PL1  | -0.30 dB        |
| PL1W | 10.09325600 W   |
| SFO1 | 282.3865635 MHz |

===== CHANNEL f2 =====

|         |                 |
|---------|-----------------|
| CPDPRG2 | waltz16         |
| NUC2    | 1H              |
| PCPD2   | 80.00 usec      |
| PL2     | 0.58 dB         |
| PL12    | 16.50 dB        |
| PL2W    | 9.45079708 W    |
| PL12W   | 0.24180678 W    |
| SFO2    | 300.1300000 MHz |
| SI      | 16384           |
| SF      | 282.4046280 MHz |
| WDW     | EM              |
| SSB     | 0               |
| LB      | 2.00 Hz         |
| GB      | 0               |
| PC      | 1.00            |

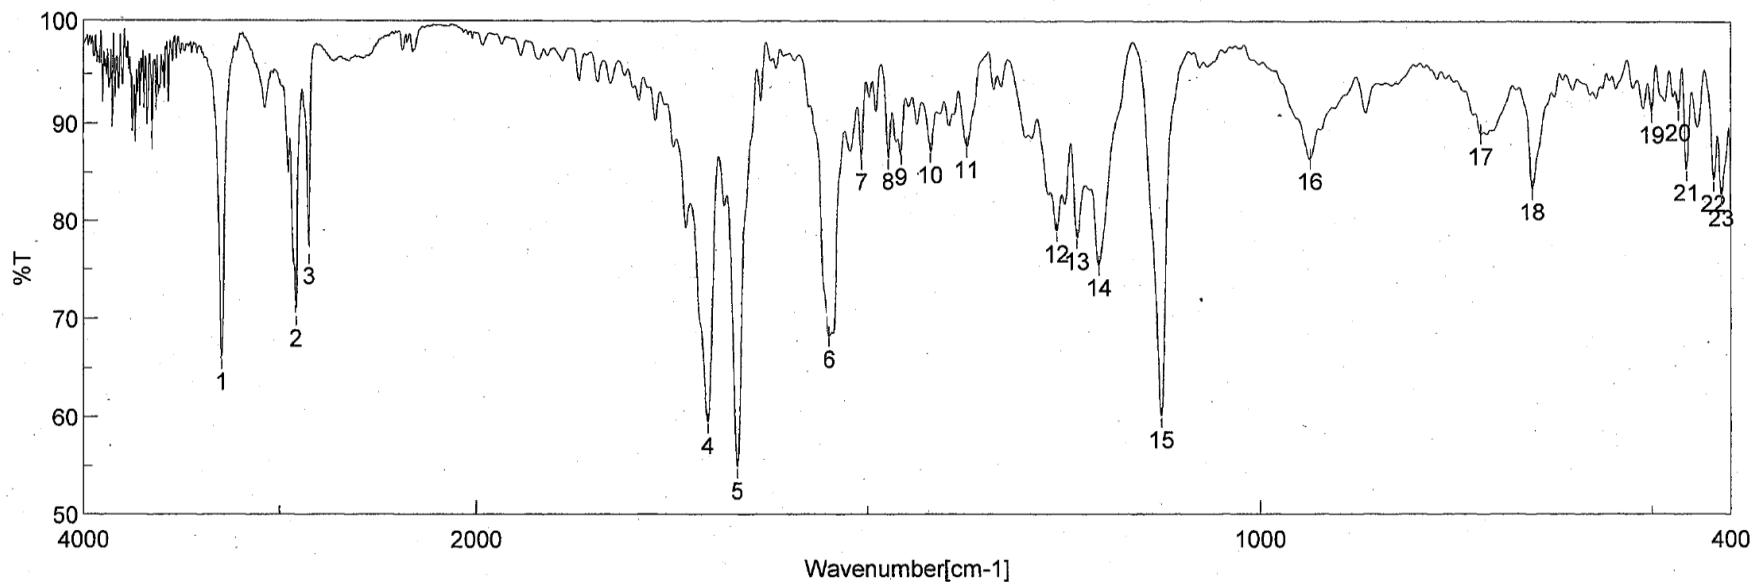

積算回数  
ゼロフィリング  
ゲイン  
測定日時  
測定者  
ファイル名  
サンプル名  
コメント

16  
ON  
8  
2016/11/22 14:25  
kawamata  
Memory#2  
s-F10

分解  
アポダイゼーション  
スキャンスピード  
更新日時

4 cm-1  
Cosine  
2 mm/sec  
2016/11/22 14:28

|              |       |              |       |              |       |              |       |
|--------------|-------|--------------|-------|--------------|-------|--------------|-------|
| 1: 3294.79,  | 65.91 | 2: 2915.84,  | 70.28 | 3: 2849.31,  | 76.60 | 4: 1704.76,  | 59.35 |
| 5: 1667.16,  | 54.71 | 6: 1548.56,  | 68.17 | 7: 1507.10,  | 86.37 | 8: 1473.35,  | 86.43 |
| 9: 1456.96,  | 86.88 | 10: 1419.35, | 87.09 | 11: 1373.07, | 87.61 | 12: 1258.32, | 78.88 |
| 13: 1232.29, | 78.12 | 14: 1204.33, | 75.42 | 15: 1125.26, | 59.92 | 16: 936.27,  | 86.42 |
| 17: 718.35,  | 88.94 | 18: 652.79,  | 83.22 | 19: 500.44,  | 91.17 | 20: 466.69,  | 91.42 |
| 21: 456.08,  | 85.25 | 22: 421.37,  | 84.13 | 23: 411.73,  | 82.60 |              |       |

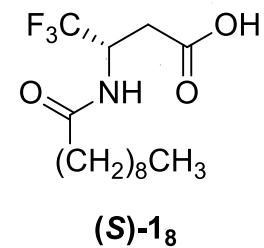

1H CPQNP

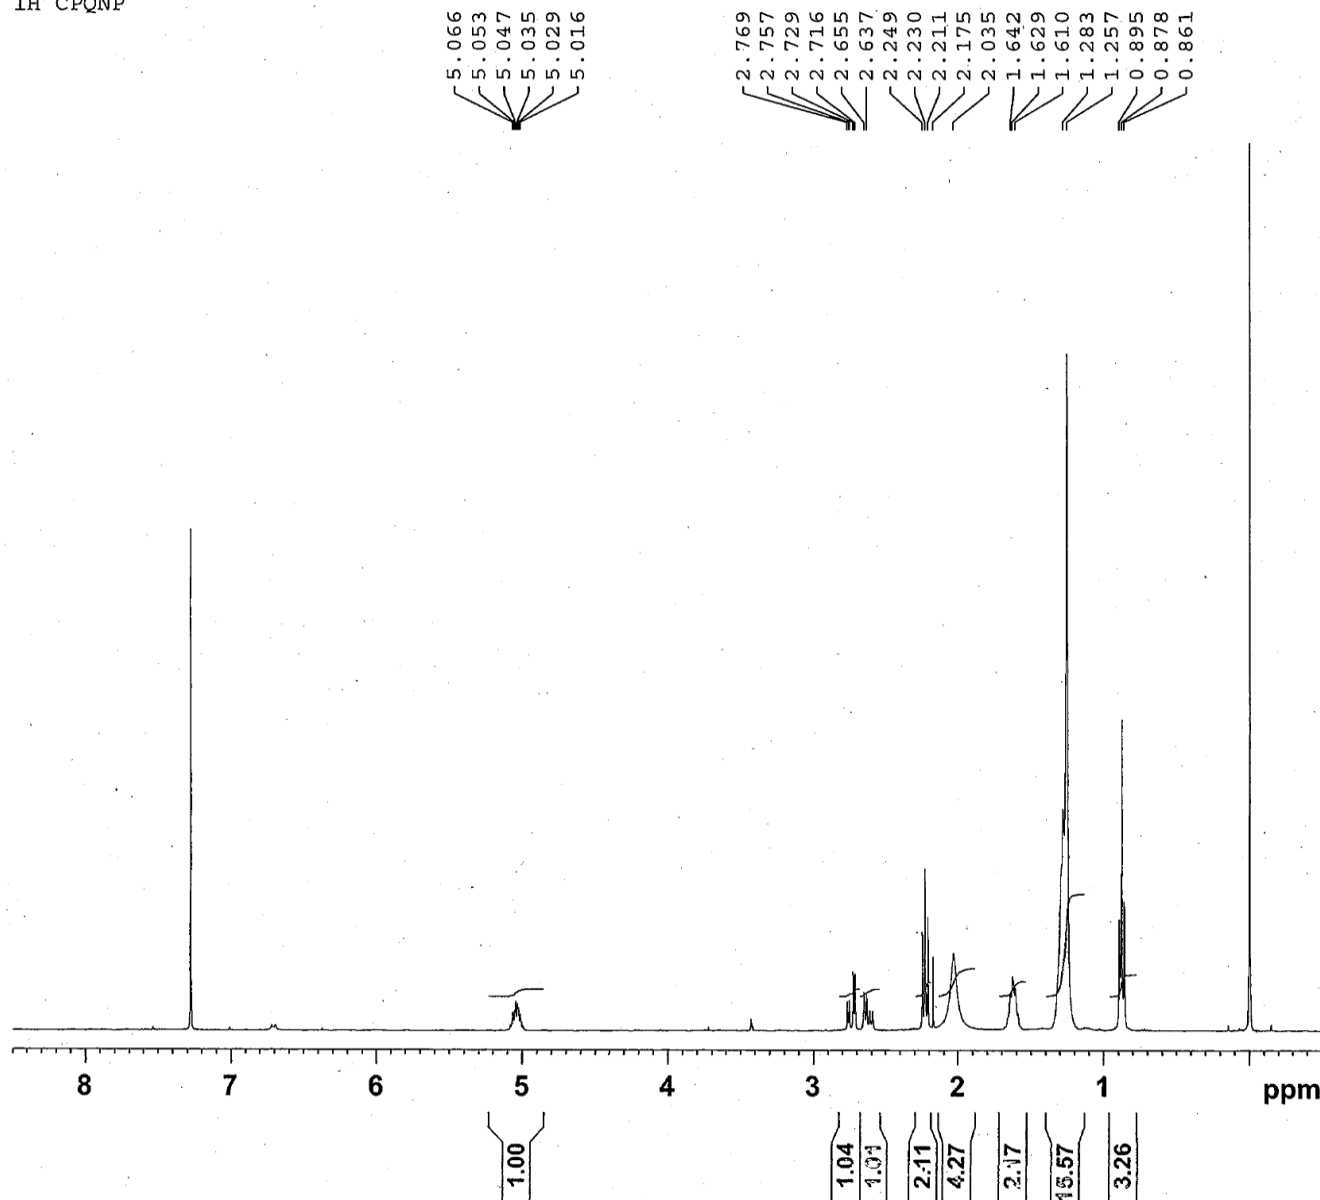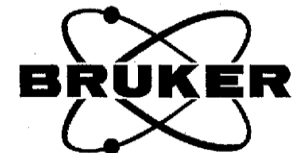

Current Data Parameters  
NAME kodama  
EXPNO 12  
PROCNO 1

F2 - Acquisition Parameters  
Date\_ 20170914  
Time\_ 21.01  
INSTRUM spect  
PROBHD 5 mm CPQNP 1H/  
PULPROG zg30  
TD 65536  
SOLVENT CDCl3  
NS 4  
DS 2  
SWH 8305.647 Hz  
FIDRES 0.126734 Hz  
AQ 3.9453173 sec  
RG 7.21  
DW 60.200 usec  
DE 10.00 usec  
TE 300.0 K  
D1 1.00000000 sec  
TDO 1

----- CHANNEL f1 -----  
NUC1 1H  
P1 15.00 usec  
PLW1 5.19999981 W  
SFO1 400.1324708 MHz

F2 - Processing parameters  
SI 32768  
SF 400.1300025 MHz  
WDW EM  
SSB 0  
LB 0.30 Hz  
GB 0  
PC 1.00

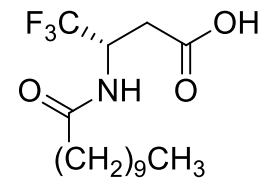

13C with dec. CPQNP

173.43  
171.51

128.89  
126.09  
123.29  
120.49

47.72  
47.41  
47.09  
46.77  
36.45  
32.94  
31.91  
29.57  
29.47  
29.31  
29.11  
25.46  
22.69  
14.10

0.00

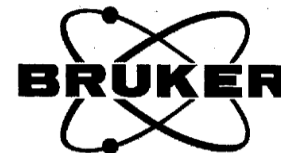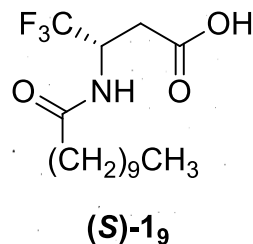

Current Data Parameters  
NAME kodama  
EXPNO 13  
PROCNO 1

F2 - Acquisition Parameters  
Date\_ 20170914  
Time\_ 21.15  
INSTRUM spect  
PROBHD 5 mm CPQNP 1H/  
PULPROG zgpg30  
TD 65536  
SOLVENT CDC13  
NS 1024  
DS 2  
SWH 29761.904 Hz  
FIDRES 0.454131 Hz  
AQ 1.1010548 sec  
RG 126.99  
DW 16.800 usec  
DE 18.00 usec  
TE 300.0 K  
D1 2.00000000 sec  
D11 0.03000000 sec  
TD0 1

==== CHANNEL f1 =====  
NUC1 13C  
P1 12.00 usec  
PLW1 15.50000000 W  
SFO1 100.6248425 MHz

==== CHANNEL f2 =====  
CPDPRG2 waltz16  
NUC2 1H  
PCPD2 90.00 usec  
PLW2 5.19999981 W  
PLW12 0.14444000 W  
PLW13 0.11700000 W  
SFO2 400.1316005 MHz

F2 - Processing parameters  
SI 32768  
SF 100.6127639 MHz  
WDW EM  
SSB 0  
LB 2.00 Hz  
GB 0  
PC 1.40

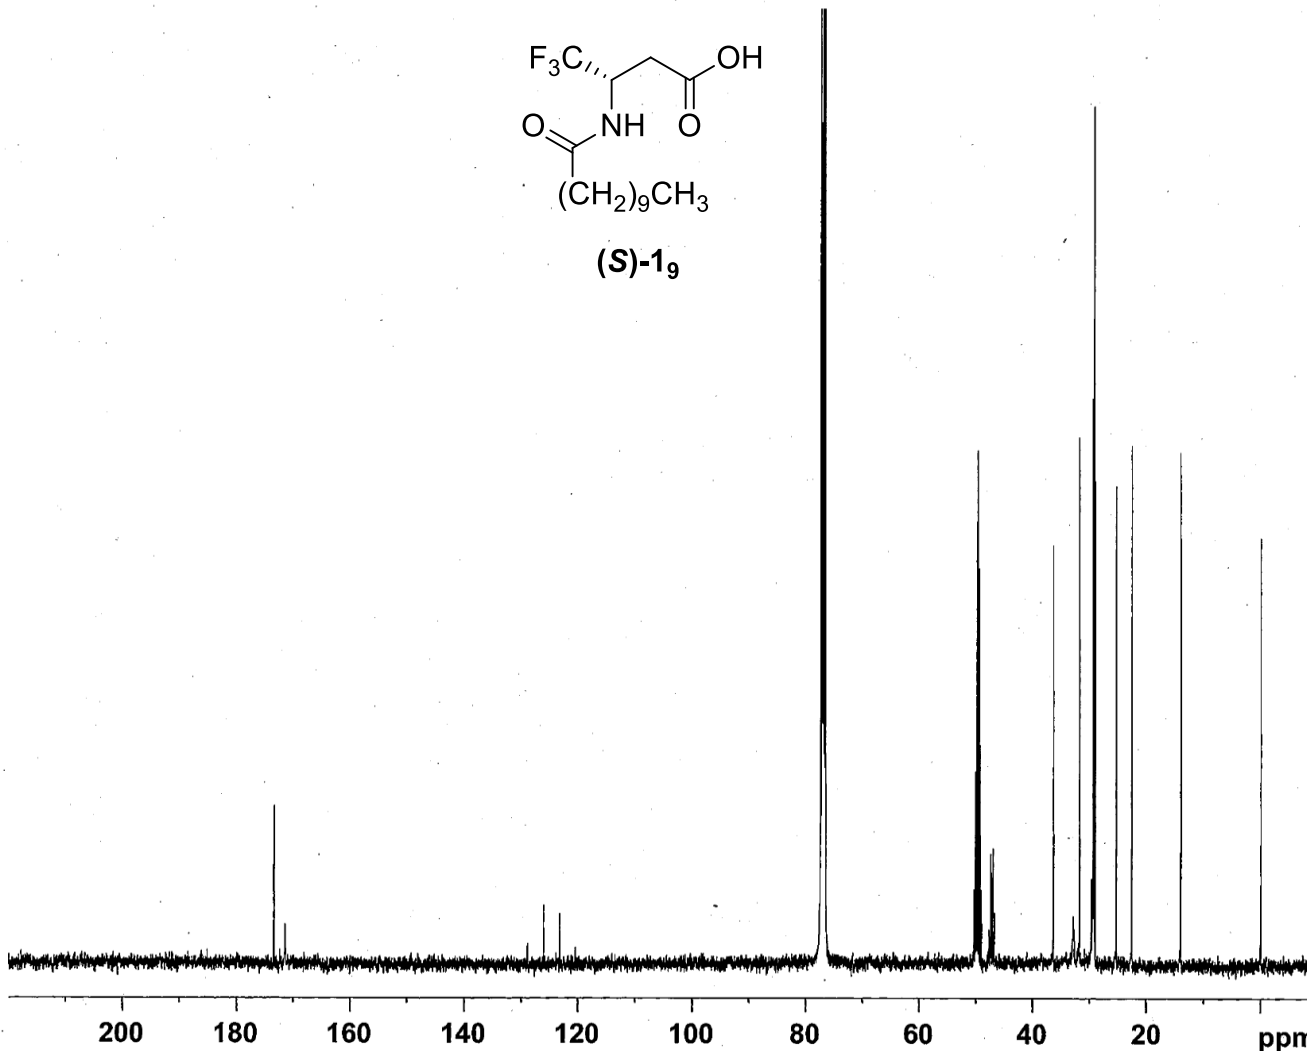



- ACCEPTANCE - System: AV300 OrderNo.: JH033009 Customer: Saitama University Engineer: IKD  
 P/N Console: Z108356/162 Shim system: BOSS I original dataset: 104275\_0150snf 3 1  
 Probe: 5 mm PABBO BB-1H/D Z-GRD Z104275/0150 Sample depth:20 Gas: air  
 Sensitivity test for 19F (additional test); Sample: 0.05% TFT in CDCl3 (P/N: Z10234)

Sino= 243:1 ( signal= -61 - -65 ppm noise= -59.08 - -60.08 ppm [1 ppm] noise range= 4.5 ppm )  
 P1= 15usec PL1= -0.3dB

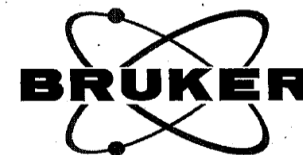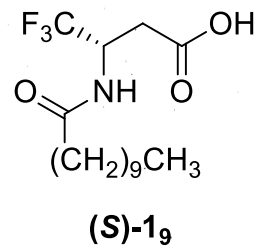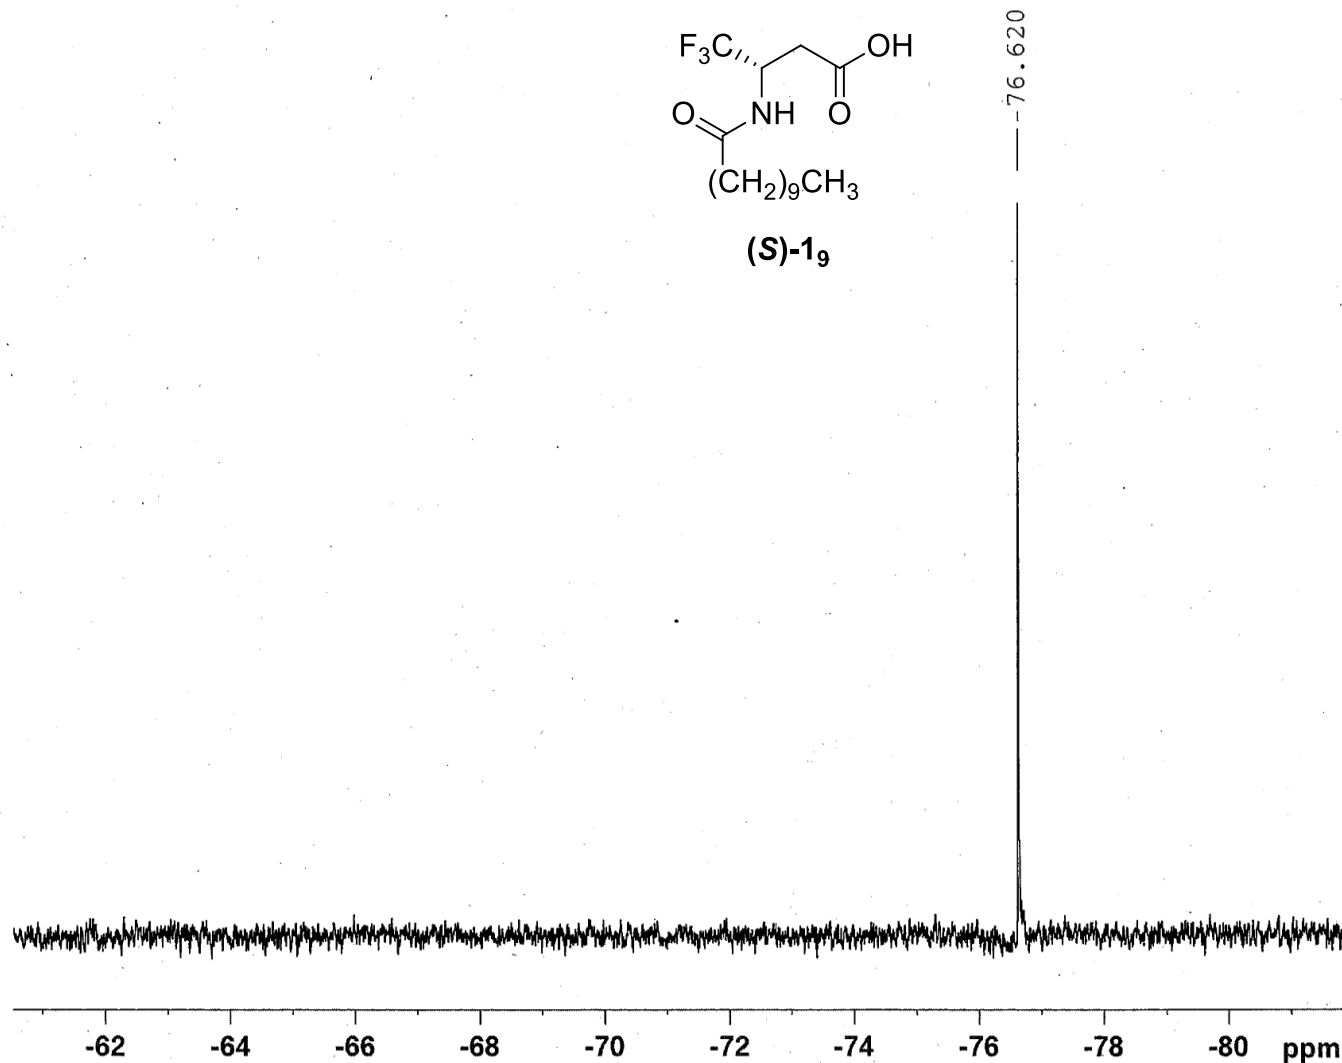

NAME A16mc211rk  
 EXPNO 17091305  
 PROCNO 1  
 Date\_ 20170913  
 Time 13.48  
 INSTRUM spect  
 PROBHD 5 mm PABBO BB-  
 PULPROG zgfhigqn  
 TD 32768  
 SOLVENT CDCl3  
 NS 1  
 DS 0  
 SWH 12019.230 Hz  
 FIDRES 0.366798 Hz  
 AQ 1.3631988 sec  
 RG 203  
 DW 41.600 usec  
 DE 6.50 usec  
 TE 297.0 K  
 D1 10.00000000 sec  
 D11 0.03000000 sec  
 D12 0.00002000 sec  
 TD0 1

===== CHANNEL f1 =====  
 NUC1 19F  
 P1 15.00 usec  
 PL1 -0.30 dB  
 PL1W 10.09325600 W  
 SFO1 282.3865635 MHz

===== CHANNEL f2 =====  
 CPDPRG2 waltz16  
 NUC2 1H  
 PCPD2 80.00 usec  
 PL2 0.58 dB  
 PL12 16.50 dB  
 PL2W 9.45079708 W  
 PL12W 0.24180678 W  
 SFO2 300.1300000 MHz  
 SI 16384  
 SF 282.4046264 MHz  
 WDW EM  
 SSB 0  
 LB 2.00 Hz  
 GB 0  
 PC 1.00

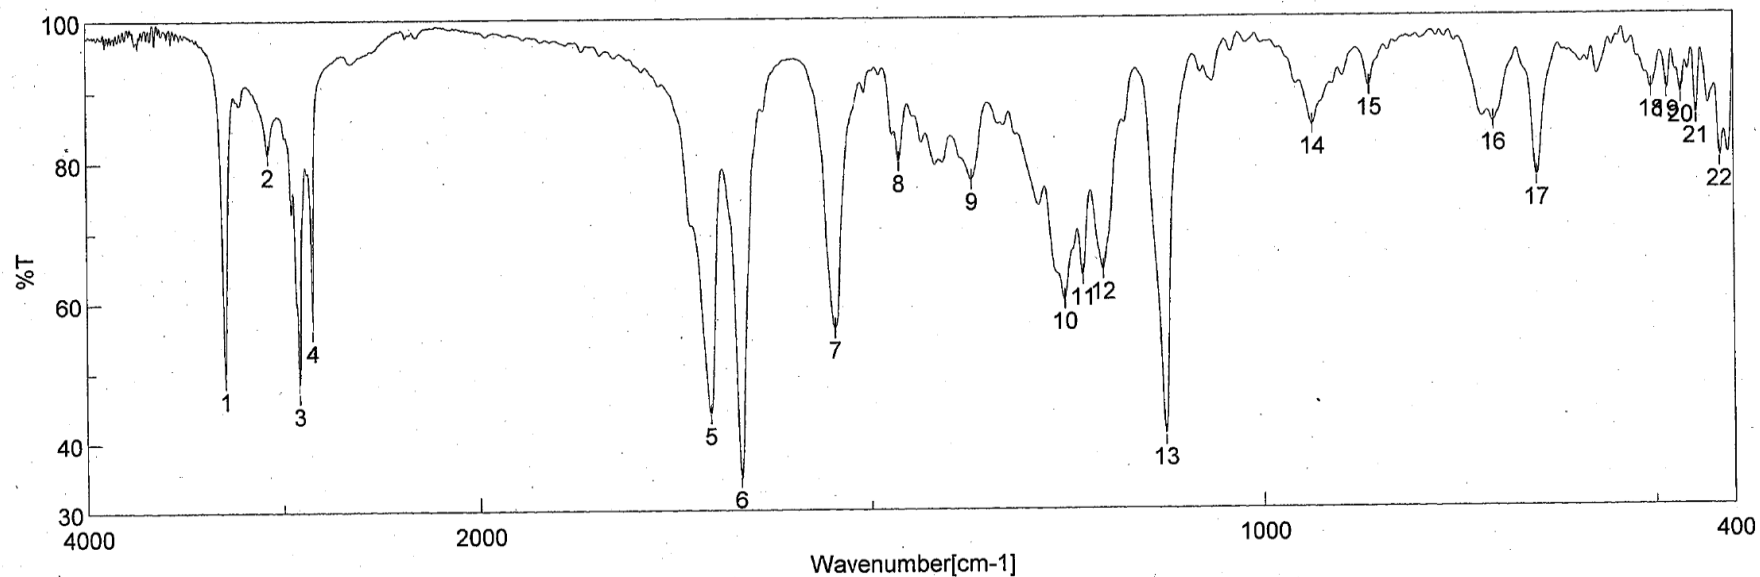

積算回数  
ゼロフィリング  
ゲイン  
測定日時  
測定者  
ファイル名  
サンプル名  
コメント

16  
ON  
8  
2017/09/19 14:53  
kawamata  
Memory#2  
rac-CF3-C10-COOH  
S

分解  
アポダイゼーション  
スキャンスピード  
更新日時

4 cm-1  
Cosine  
2 mm/sec  
2017/09/19 14:54

|              |       |              |       |              |       |              |       |
|--------------|-------|--------------|-------|--------------|-------|--------------|-------|
| 1: 3293.82,  | 49.33 | 2: 3073.98,  | 81.26 | 3: 2915.84,  | 47.16 | 4: 2849.31,  | 56.17 |
| 5: 1705.73,  | 43.92 | 6: 1667.16,  | 34.74 | 7: 1546.63,  | 56.14 | 8: 1463.71,  | 79.77 |
| 9: 1371.14,  | 77.14 | 10: 1252.54, | 60.06 | 11: 1229.40, | 63.50 | 12: 1203.36, | 64.34 |
| 13: 1124.30, | 40.57 | 14: 936.27,  | 84.67 | 15: 863.95,  | 90.22 | 16: 705.82,  | 85.03 |
| 17: 650.86,  | 77.19 | 18: 504.29,  | 89.58 | 19: 485.01,  | 89.46 | 20: 466.69,  | 88.75 |
| 21: 447.40,  | 85.75 | 22: 417.51,  | 79.57 |              |       |              |       |

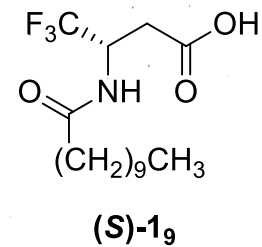

1H

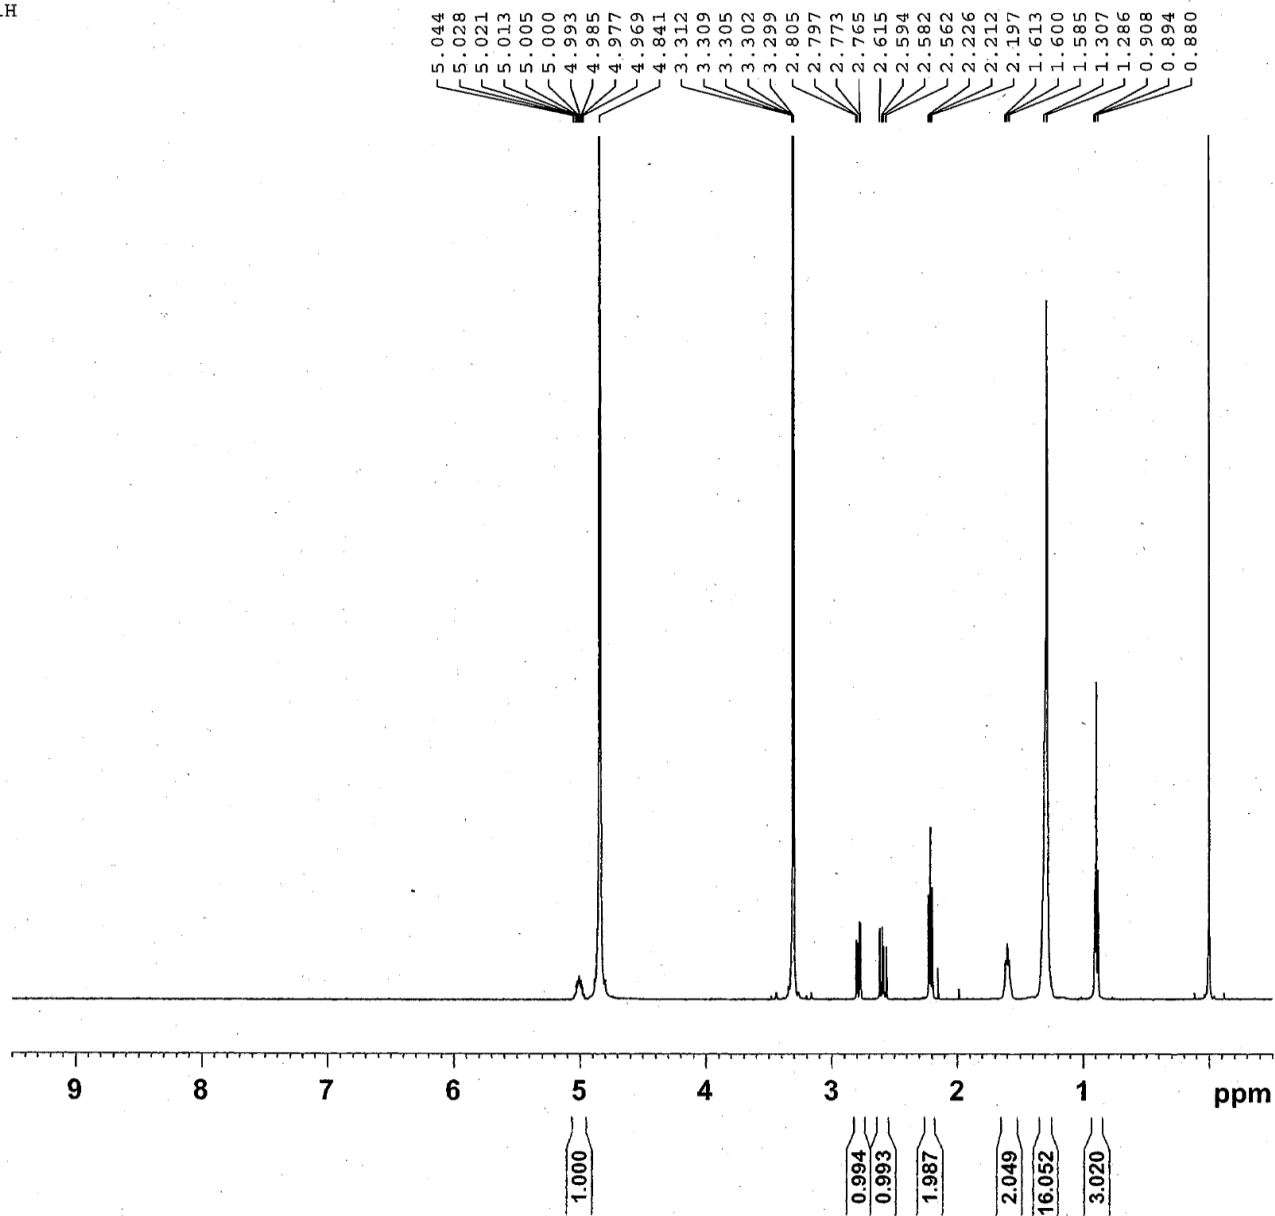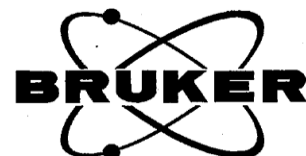

NAME A16mc211rk  
EXPNO 17091204  
PROCNO 1  
Date\_ 20170912  
Time 18.13  
INSTRUM spect  
PROBHD 5 mm PABBO BB-  
PULPROG zg30  
TD 65536  
SOLVENT MeOD  
NS 8  
DS 2  
SWH 10330.578 Hz  
FIDRES 0.157632 Hz  
AQ 3.1719923 sec  
RG 203  
DW 48.400 usec  
DE 6.50 usec  
TE 300.5 K  
D1 1.00000000 sec  
TD0 1

==== CHANNEL f1 =====  
NUC1 1H  
P1 11.80 usec  
PL1 2.40 dB  
PL1W 15.17711735 W  
SFO1 500.0330885 MHz  
SI 32768  
SF 500.0300106 MHz  
WDW EM  
SSB 0  
LB 0.30 Hz  
GB 0  
PC 1.00

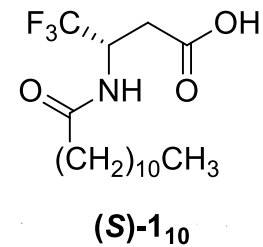

13C with dec. CPQNP

173.34  
171.48

128.89  
126.08  
123.29  
120.48

47.69  
47.38  
47.06  
46.74  
36.46  
32.84  
31.93  
29.61  
29.47  
29.35  
29.30  
29.11  
25.45  
22.70  
14.11

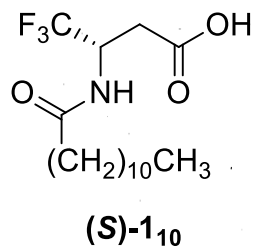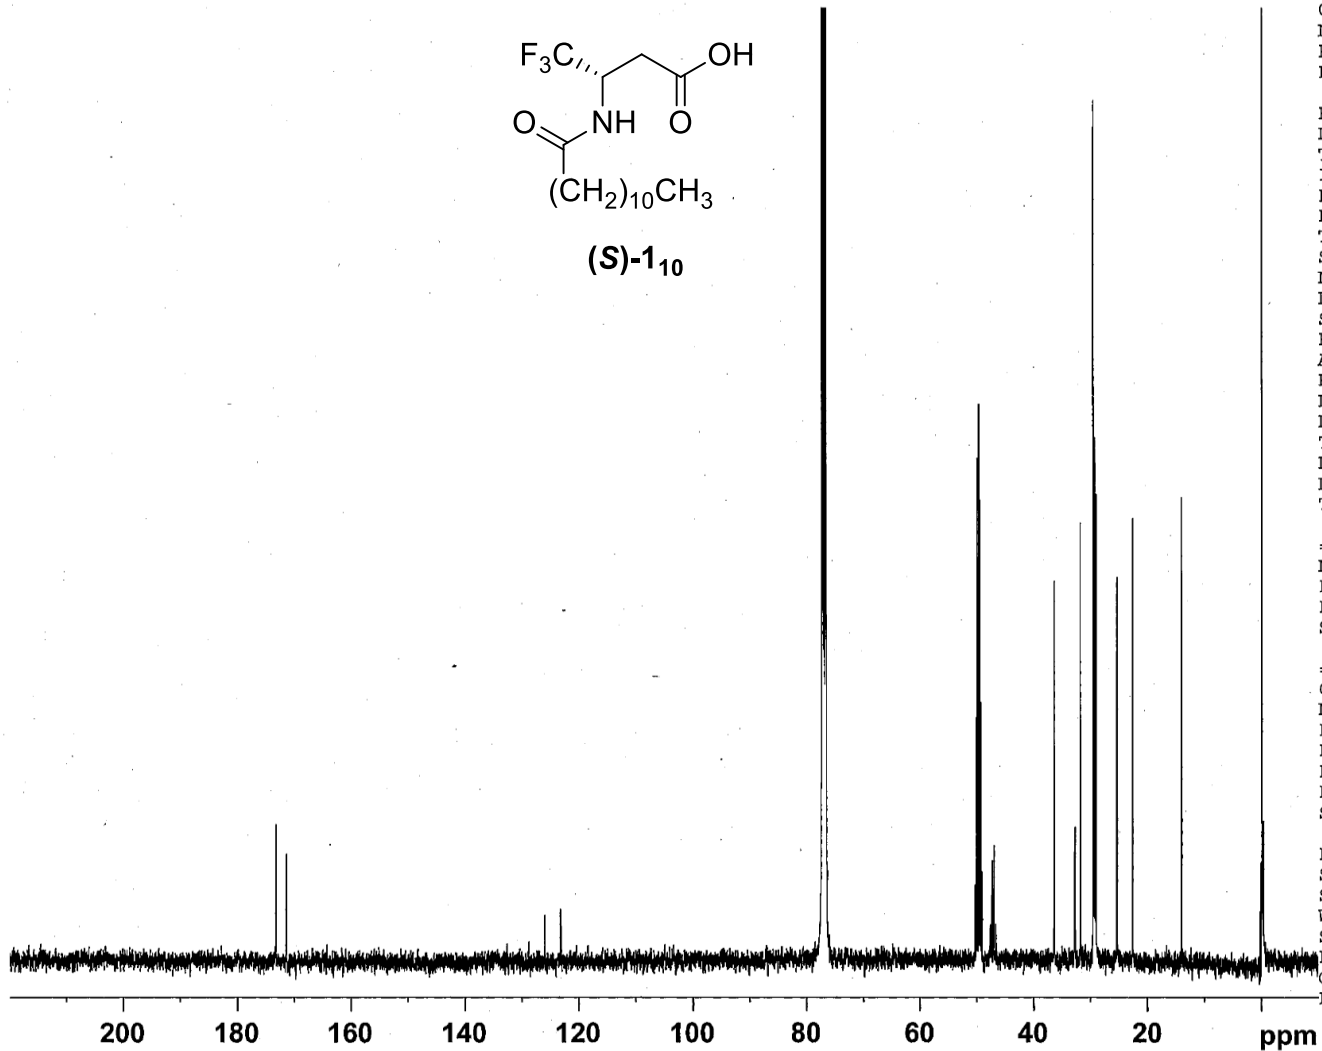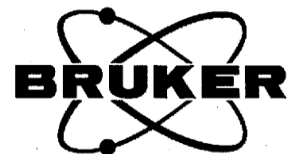

Current Data Parameters  
NAME kodama  
EXPNO 9  
PROCNO 1

F2 - Acquisition Parameters  
Date\_ 20170913  
Time 20.17  
INSTRUM spect  
PROBHD 5 mm CPQNP 1H/  
PULPROG zgpg30  
TD 65536  
SOLVENT CDCl3  
NS 1024  
DS 2  
SWH 29761.904 Hz  
FIDRES 0.454131 Hz  
AQ 1.1010548 sec  
RG 126.99  
DW 16.800 usec  
DE 18.00 usec  
TE 300.0 K  
D1 2.00000000 sec  
D11 0.03000000 sec  
TDO 1

==== CHANNEL f1 =====  
NUC1 13C  
P1 12.00 usec  
PLW1 15.50000000 W  
SFO1 100.6248425 MHz

==== CHANNEL f2 =====  
CPDPRG2 waltz16  
NUC2 1H  
PCPD2 90.00 usec  
PLW2 5.199999981 W  
PLW12 0.14444000 W  
PLW13 0.11700000 W  
SFO2 400.1316005 MHz

F2 - Processing parameters  
SI 32768  
SF 100.6127642 MHz  
WDW EM  
SSB 0  
LB 2.00 Hz  
GB 0  
PC 1.40

- ACCEPTANCE - System: AV300 OrderNo.: JH033009 Customer: Saitama University Engineer: IKD  
 P/N Console: Z108356/162 Shim system: BOSS I original dataset: 104275\_0150snf 3 1  
 Probe: 5 mm PABBO BB-1H/D Z-GRD Z104275/0150 Sample depth:20 Gas: air  
 Sensitivity test for 19F (additional test); Sample: 0,05% TFT in CDCl3 (P/N: Z10234)

Sino= 243:1 ( signal= -61 - -65 ppm noise= -59.08 - -60.08 ppm [1 ppm] noise range= 4.5 ppm )  
 P1= 15usec PL1= -0.3dB

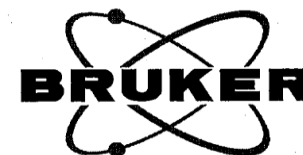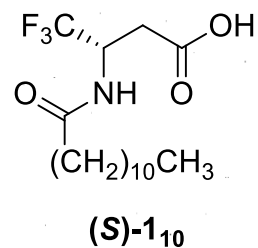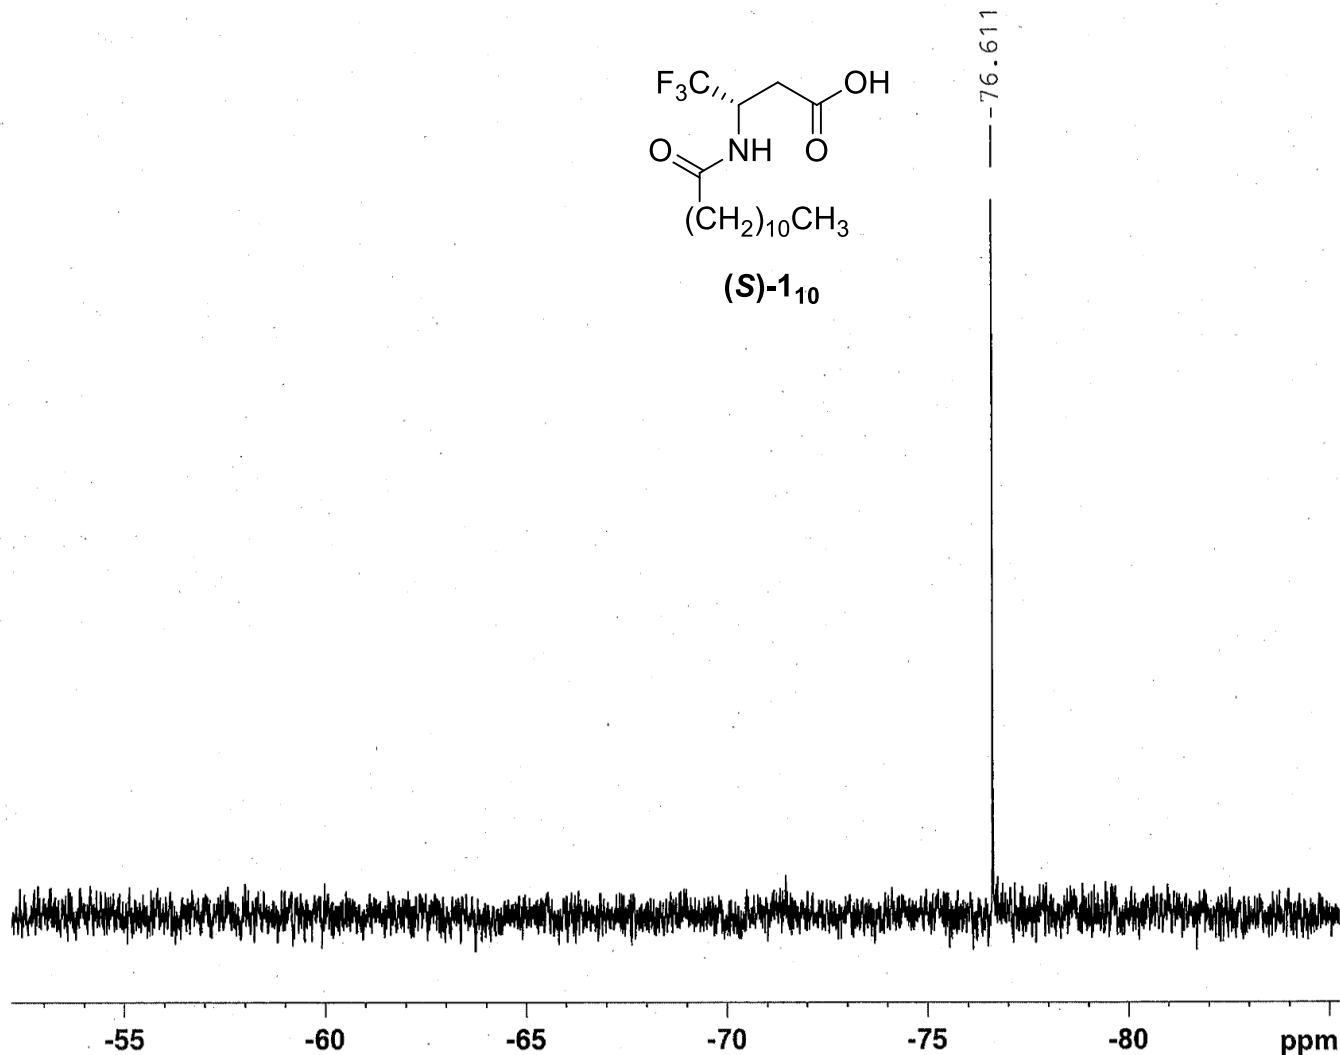

|         |                 |
|---------|-----------------|
| NAME    | A16mc211rk      |
| EXPNO   | 17091302        |
| PROCNO  | 1               |
| Date_   | 20170913        |
| Time    | 12.40           |
| INSTRUM | spect           |
| PROBHD  | 5 mm PABBO BB-  |
| PULPROG | zgfhigqn        |
| TD      | 32768           |
| SOLVENT | CDCl3           |
| NS      | 1               |
| DS      | 0               |
| SWH     | 12019.230 Hz    |
| FIDRES  | 0.366798 Hz     |
| AQ      | 1.3631988 sec   |
| RG      | 203             |
| DW      | 41.600 usec     |
| DE      | 6.50 usec       |
| TE      | 297.0 K         |
| D1      | 10.00000000 sec |
| D11     | 0.03000000 sec  |
| D12     | 0.00002000 sec  |
| TD0     | 1               |

==== CHANNEL f1 =====

|      |                 |
|------|-----------------|
| NUC1 | 19F             |
| P1   | 15.00 usec      |
| PL1  | -0.30 dB        |
| PL1W | 10.09325600 W   |
| SFO1 | 282.3865635 MHz |

==== CHANNEL f2 =====

|         |                 |
|---------|-----------------|
| CPDPRG2 | waltz16         |
| NUC2    | 1H              |
| PCPD2   | 80.00 usec      |
| PL2     | 0.58 dB         |
| PL12    | 16.50 dB        |
| PL2W    | 9.45079708 W    |
| PL12W   | 0.24180678 W    |
| SFO2    | 300.1300000 MHz |
| SI      | 16384           |
| SF      | 282.4046264 MHz |
| WDW     | EM              |
| SSB     | 0               |
| LB      | 2.00 Hz         |
| GB      | 0               |
| PC      | 1.00            |

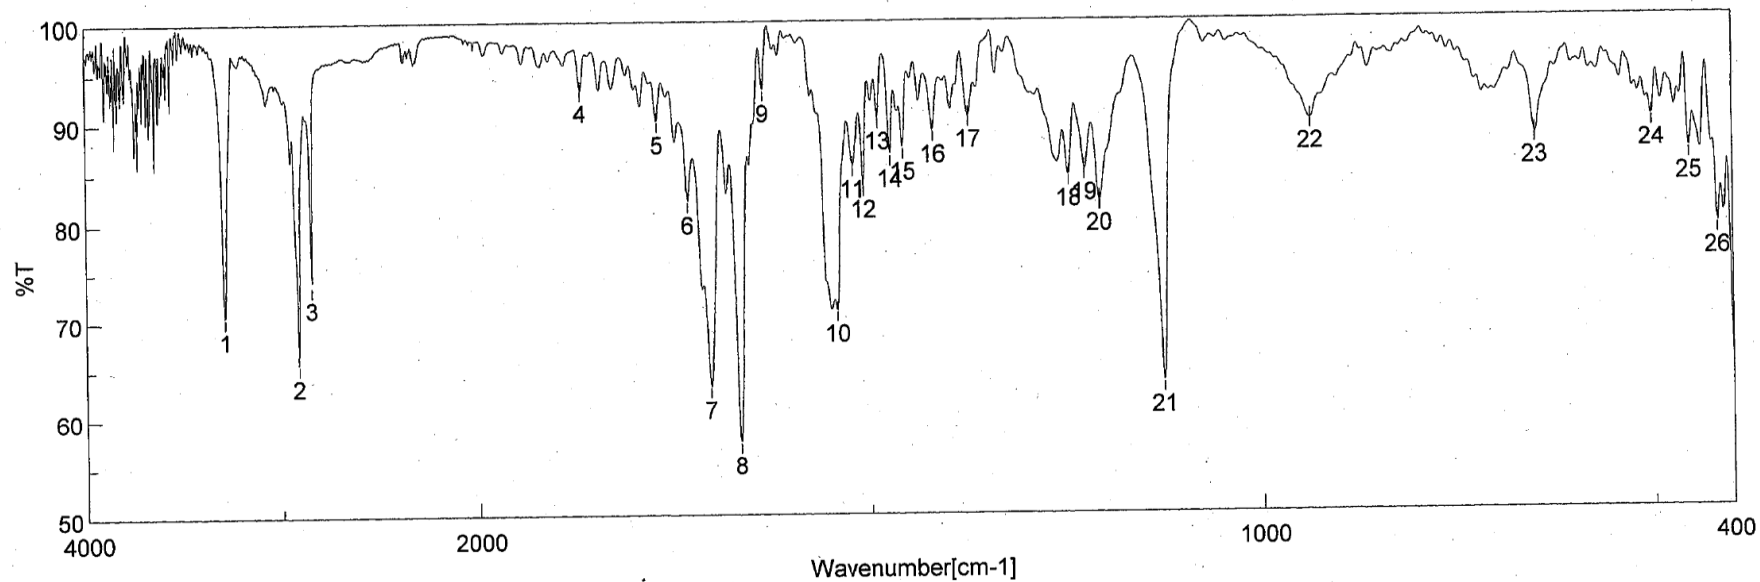

積算回数  
ゼロフィリング  
ゲイン  
測定日時  
測定者  
ファイル名  
サンプル名  
コメント

16  
ON  
8  
2016/11/22 14:57  
kawamata  
Memory#2  
s-F12

分解  
アポダイゼーション  
スキャンスピード  
更新日時

4 cm-1  
Cosine  
2 mm/sec  
2016/11/22 15:00

|              |       |              |       |              |       |              |       |
|--------------|-------|--------------|-------|--------------|-------|--------------|-------|
| 1: 3293.82,  | 70.39 | 2: 2915.84,  | 65.56 | 3: 2849.31,  | 73.56 | 4: 1868.68,  | 93.15 |
| 5: 1771.30,  | 89.91 | 6: 1732.73,  | 81.94 | 7: 1704.76,  | 63.06 | 8: 1667.16,  | 57.31 |
| 9: 1636.30,  | 92.96 | 10: 1542.77, | 70.76 | 11: 1521.56, | 85.38 | 12: 1507.10, | 83.40 |
| 13: 1488.78, | 90.09 | 14: 1473.35, | 86.38 | 15: 1456.96, | 87.08 | 16: 1418.39, | 88.78 |
| 17: 1373.07, | 90.24 | 18: 1245.79, | 84.34 | 19: 1225.54, | 84.90 | 20: 1206.26, | 81.85 |
| 21: 1125.26, | 63.28 | 22: 937.23,  | 89.72 | 23: 651.82,  | 88.02 | 24: 502.37,  | 89.63 |
| 25: 455.12,  | 86.28 | 26: 419.44,  | 78.83 |              |       |              |       |

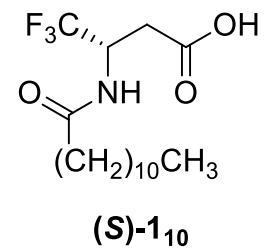

<sup>1</sup>H

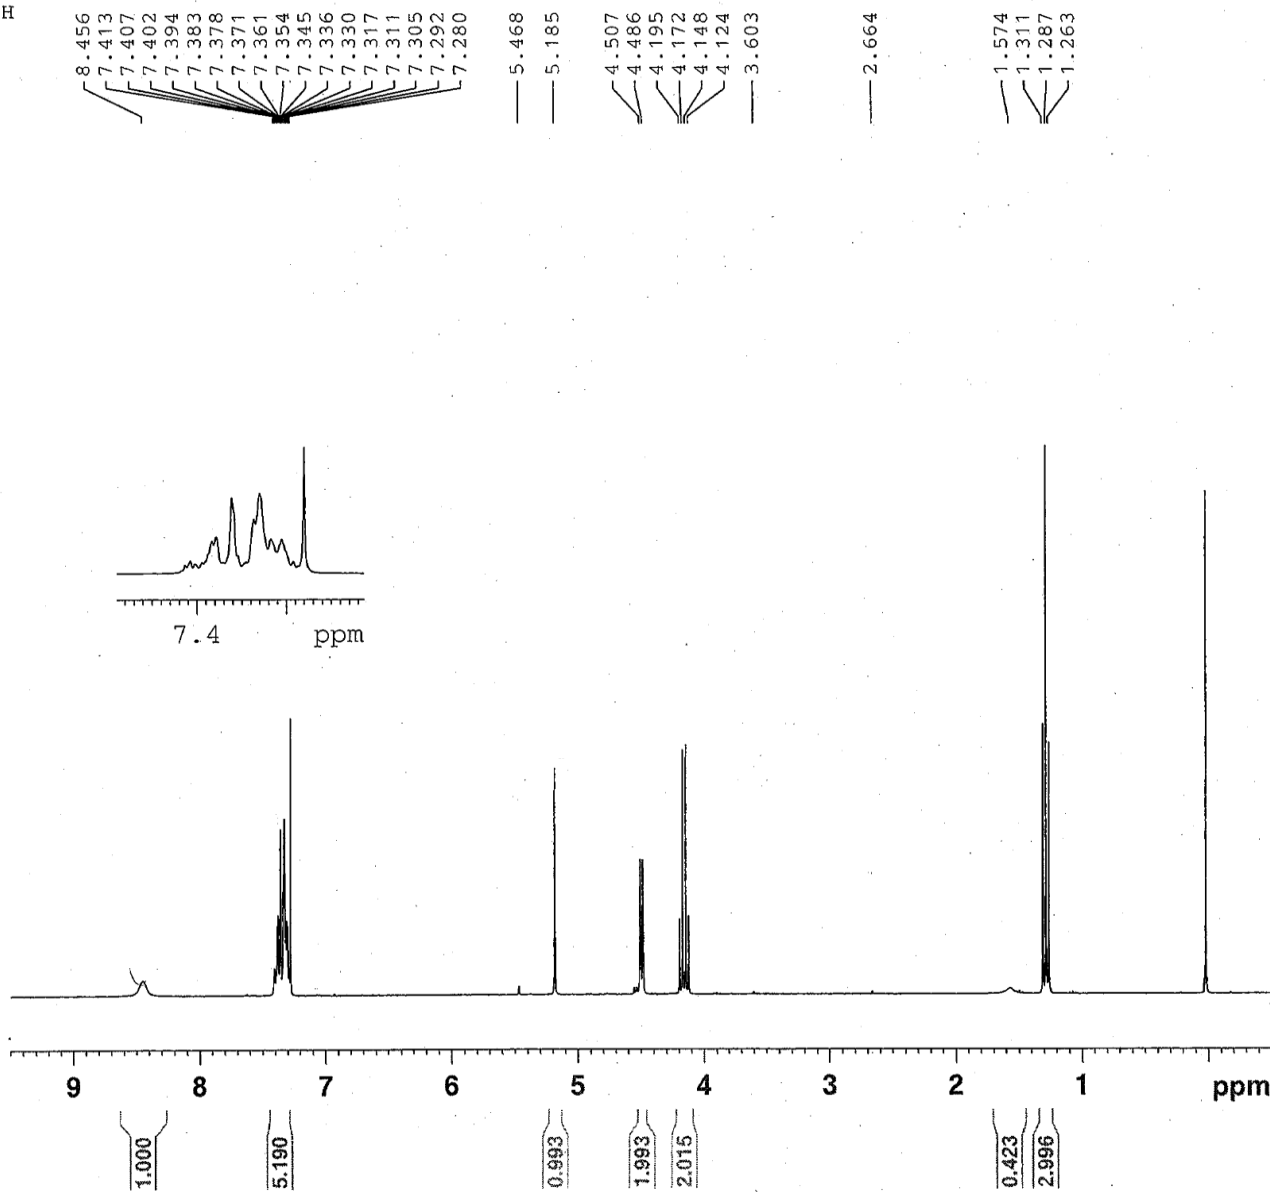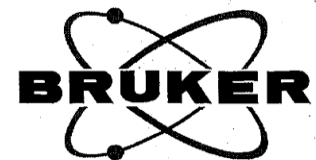

NAME A12TA020rk  
EXPNO 16032804  
PROCNO 1  
Date\_ 20160328  
Time 18.00  
INSTRUM spect  
PROBHD 5 mm PABBO BB-  
PULPROG zg30  
TD 65536  
SOLVENT CDCl3  
NS 8  
DS 2  
SWH 6188.119 Hz  
FIDRES 0.094423 Hz  
AQ 5.2953587 sec  
RG 203  
DW 80.800 usec  
DE 6.50 usec  
TE 296.9 K  
D1 1.00000000 sec  
TDO 1

----- CHANNEL f1 -----  
NUC1 1H  
P1 15.00 usec  
PL1 1.20 dB  
PL1W 8.19348145 W  
SFO1 300.1318534 MHz  
SI 32768  
SF 300.1300000 MHz  
WDW EM  
SSB 0  
LB 0.30 Hz  
GB 0  
PC 1.00

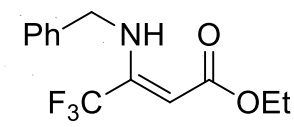

8

- ACCEPTANCE - System: AV300 OrderNo.: JH033009 Customer: Saitama University Engineer: IKD  
 P/N Console: Z108356/162 Shim system: BOSS I original dataset: 104275\_0150snf 3 1  
 Probe: 5 mm PABBO BB-1H/D Z-GRD Z104275/0150 Sample depth:20 Gas: air  
 Sensitivity test for 19F (additional test); Sample: 0,05% TFT in CDCl3 (P/N: Z10234)  
 Sino= 243:1 ( signal= -61 - -65 ppm noise= -59.08 - -60.08 ppm [1 ppm] noise range= 4.5 ppm )  
 P1= 15usec PL1= -0.3dB

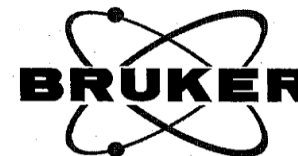

NAME A12TA020rk  
 EXPNO 16032802  
 PROCNO 1  
 Date\_ 20160328  
 Time 17.52  
 INSTRUM spect  
 PROBHD 5 mm PABBO BB-  
 PULPROG zgfhigqn  
 TD 32768  
 SOLVENT CDCl3  
 NS 1  
 DS 0  
 SWH 12019.230 Hz  
 FIDRES 0.366798 Hz  
 AQ 1.3631988 sec  
 RG 203  
 DW 41.600 usec  
 DE 6.50 usec  
 TE 297.1 K  
 D1 10.00000000 sec  
 D11 0.03000000 sec  
 D12 0.00002000 sec  
 TD0 1

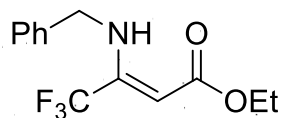

8

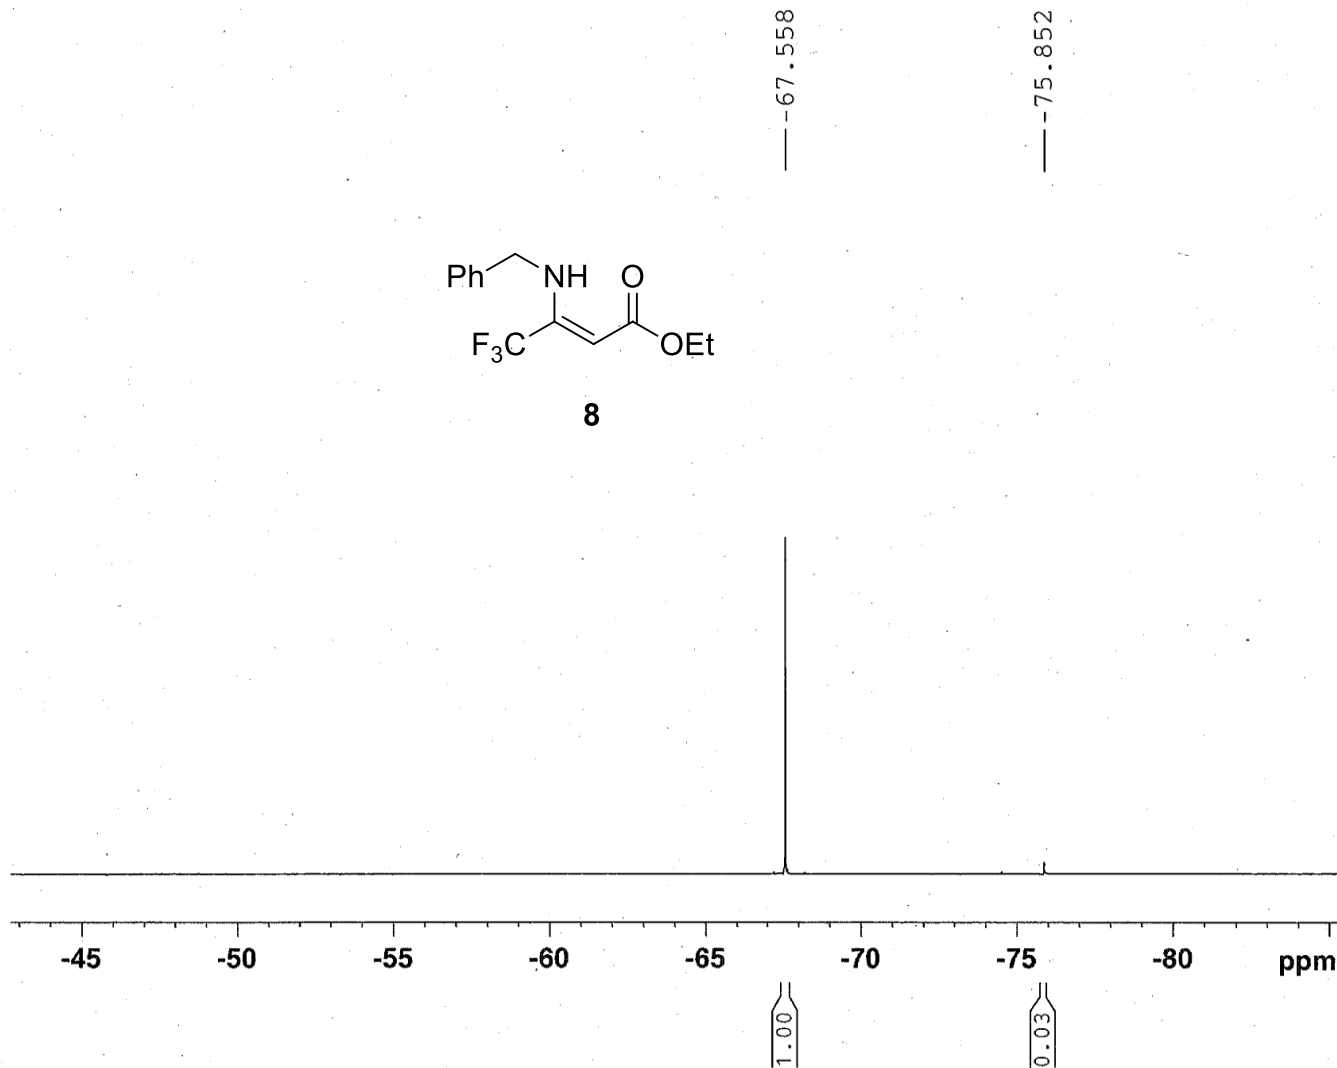

===== CHANNEL f1 =====  
 NUC1 19F  
 P1 15.00 usec  
 PL1 -0.30 dB  
 PL1W 10.09325600 W  
 SFO1 282.3865635 MHz

===== CHANNEL f2 =====  
 CPDPRG2 waltz16  
 NUC2 1H  
 PCPD2 80.00 usec  
 PL2 0.58 dB  
 PL12 16.50 dB  
 PL2W 9.45079708 W  
 PL12W 0.24180678 W  
 SFO2 300.1300000 MHz  
 SI 16384  
 SF 282.4046330 MHz  
 WDW EM  
 SSB 0  
 LB 2.00 Hz  
 GB 0  
 PC 1.00



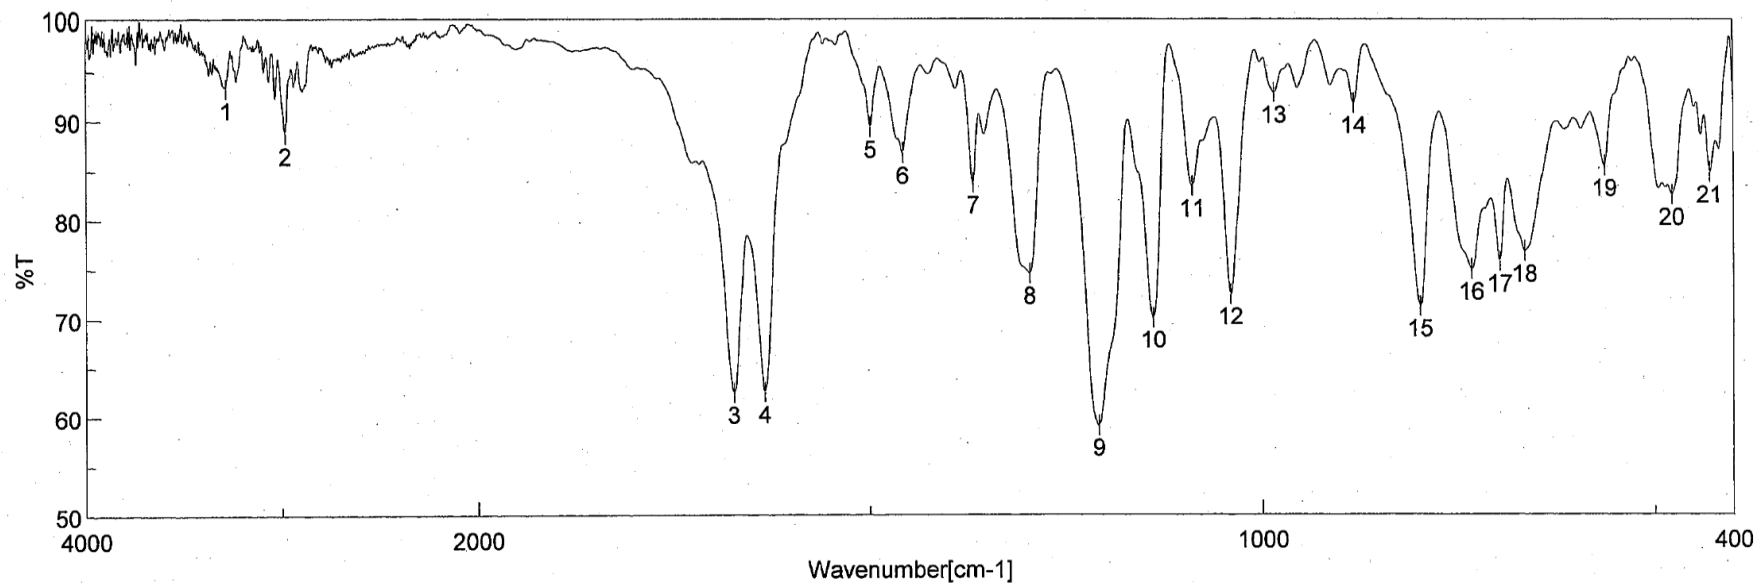

積算回数  
ゼロフィリング  
ゲイン  
測定日時  
測定者  
ファイル名  
サンプル名  
コメント

8  
ON  
8  
2017/10/19 20:35  
kawamata  
no168  
no168

分解  
アポダイゼーション  
スキャンスピード  
更新日時

4 cm-1  
Cosine  
2 mm/sec  
2018/01/25 19:46

|     |          |       |     |          |       |     |          |       |     |          |       |
|-----|----------|-------|-----|----------|-------|-----|----------|-------|-----|----------|-------|
| 1:  | 3286.11, | 93.33 | 2:  | 2983.34, | 88.80 | 3:  | 1674.87, | 62.49 | 4:  | 1635.34, | 62.56 |
| 5:  | 1498.42, | 89.40 | 6:  | 1456.96, | 86.81 | 7:  | 1367.28, | 83.80 | 8:  | 1295.93, | 74.72 |
| 9:  | 1208.18, | 59.15 | 10: | 1138.76, | 70.23 | 11: | 1088.62, | 83.48 | 12: | 1040.41, | 72.63 |
| 13: | 984.48,  | 92.92 | 14: | 883.24,  | 91.85 | 15: | 799.35,  | 71.42 | 16: | 733.78,  | 75.20 |
| 17: | 698.11,  | 75.98 | 18: | 666.29,  | 76.96 | 19: | 564.08,  | 85.57 | 20: | 478.26,  | 82.64 |
| 21: | 430.05,  | 84.90 |     |          |       |     |          |       |     |          |       |

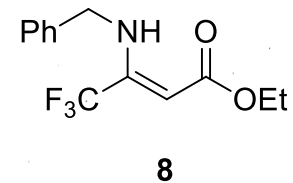

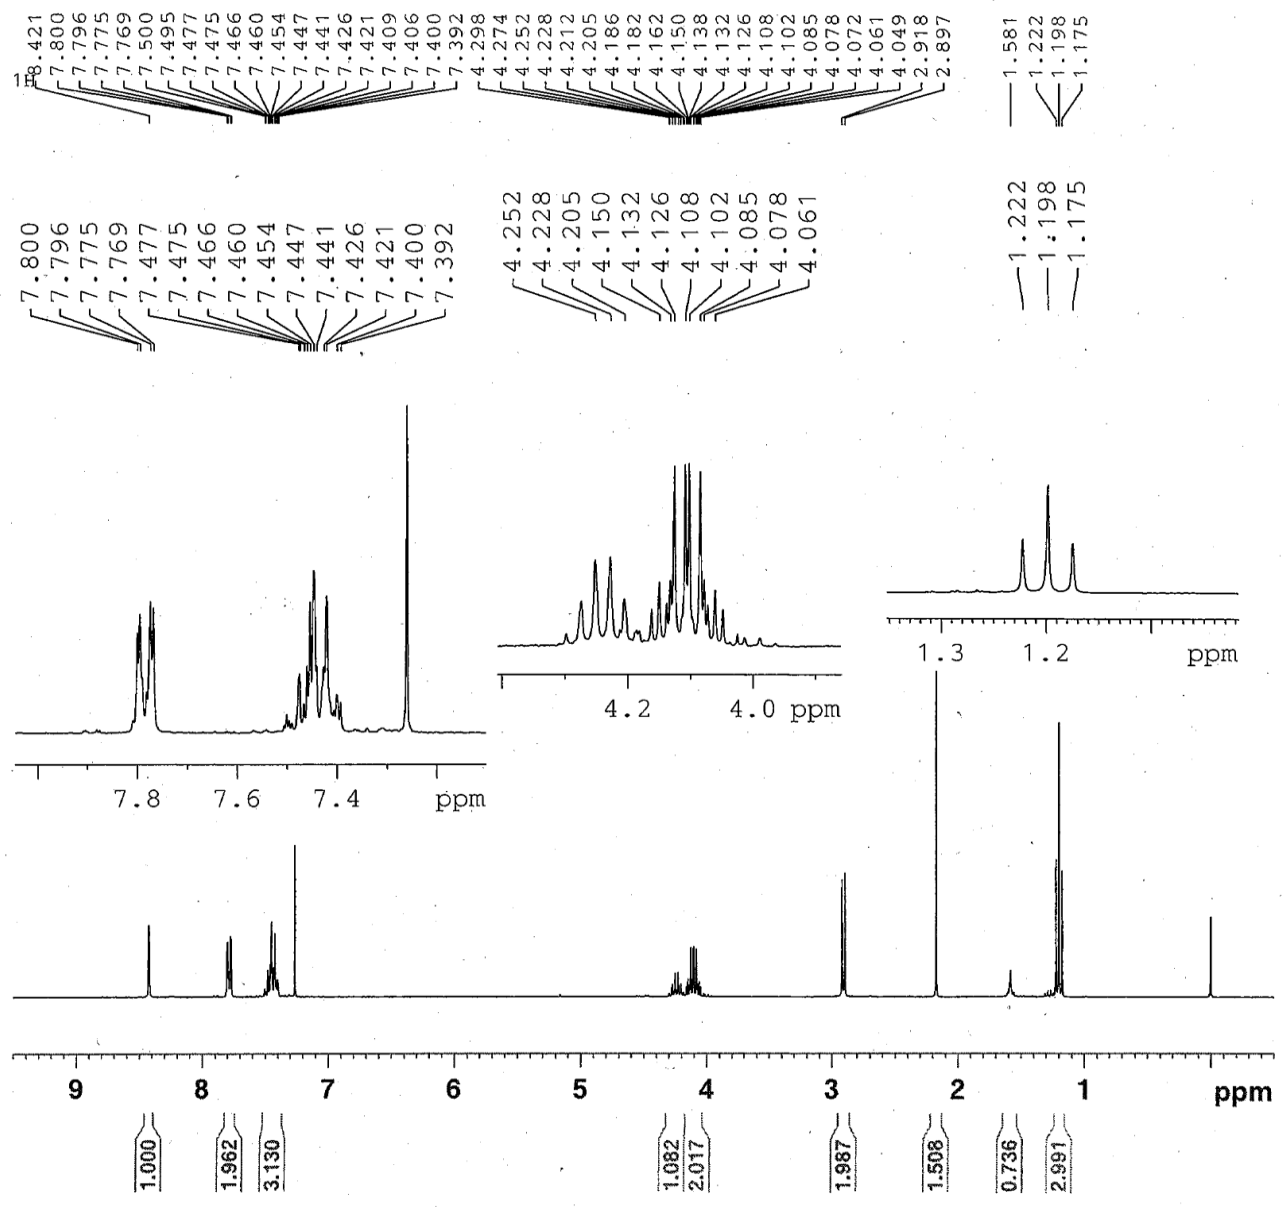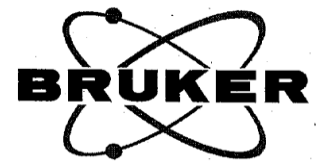

```

NAME      A16mc211rk
EXPNO     16042105
PROCNO    1
Date_     20160421
Time      17.31
INSTRUM   spect
PROBHD    5 mm PABBO BB-
PULPROG   zg30
TD         65536
SOLVENT   CDCl3
NS         8
DS         2
SWH       6188.119 Hz
FIDRES    0.094423 Hz
AQ         5.2953587 sec
RG         203
DW         80.800 usec
DE         6.50 usec
TE         296.4 K
D1         1.00000000 sec
TD0        1
  
```

```

===== CHANNEL f1 =====
NUC1      1H
P1        15.00 usec
PL1       1.20 dB
PL1W      8.19348145 W
SFO1      300.1318534 MHz
SI         32768
SF         300.1300059 MHz
WDW        EM
SSB        0
LB         0.30 Hz
GB         0
PC         1.00
  
```

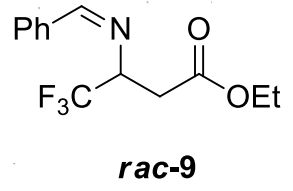

- ACCEPTANCE - System: AV300 OrderNo.: JH033009 Customer: Saitama University Engineer: IKD  
 P/N Console: Z108356/162 Shim system: BOSS-I original dataset: 104275\_0150snf 3 1  
 Probe: 5 mm PABBO BB-1H/D Z-GRD Z104275/0150 Sample depth:20 Gas: air  
 Sensitivity test for 19F (additional test); Sample: 0,05% TFT in CDCl3 (P/N: Z10234)  
 Sino= 243:1 ( signal= -61 - -65 ppm noise= -59.08 - -60.08 ppm [1 ppm] noise range= 4.5 ppm )  
 P1= 15usec PL1= -0.3dB

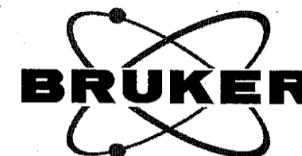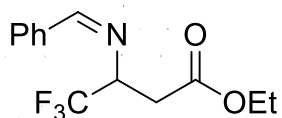

rac-9

---76.095

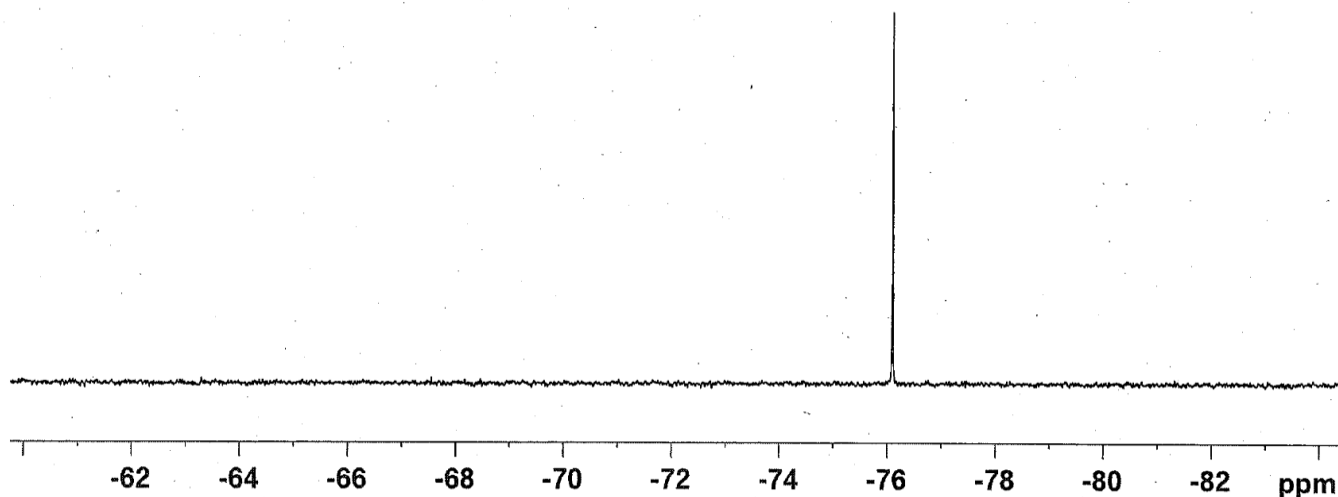

|         |                 |
|---------|-----------------|
| NAME    | A12TA020rk      |
| EXPNO   | 16033002        |
| PROCNO  | 1               |
| Date_   | 20160330        |
| Time    | 10.31           |
| INSTRUM | spect           |
| PROBHD  | 5 mm PABBO BB-  |
| PULPROG | zgfhigqn        |
| TD      | 32768           |
| SOLVENT | CDCl3           |
| NS      | 1               |
| DS      | 0               |
| SWH     | 12019.230 Hz    |
| FIDRES  | 0.366798 Hz     |
| AQ      | 1.3631988 sec   |
| RG      | 203             |
| DW      | 41.600 usec     |
| DE      | 6.50 usec       |
| TE      | 296.7 K         |
| D1      | 10.00000000 sec |
| D11     | 0.03000000 sec  |
| D12     | 0.00002000 sec  |
| TD0     | 1               |

===== CHANNEL f1 =====  
 NUC1 19F  
 P1 15.00 usec  
 PL1 -0.30 dB  
 PL1W 10.09325600 W  
 SFO1 282.3865635 MHz

===== CHANNEL f2 =====  
 CPDPRG2 waltz16  
 NUC2 1H  
 PCPD2 80.00 usec  
 PL2 0.58 dB  
 PL12 16.50 dB  
 PL2W 9.45079708 W  
 PL12W 0.24180678 W  
 SFO2 300.1300000 MHz  
 SI 16384  
 SF 282.4046286 MHz  
 WDW EM  
 SSB 0  
 LB 2.00 Hz  
 GB 0  
 PC 1.00

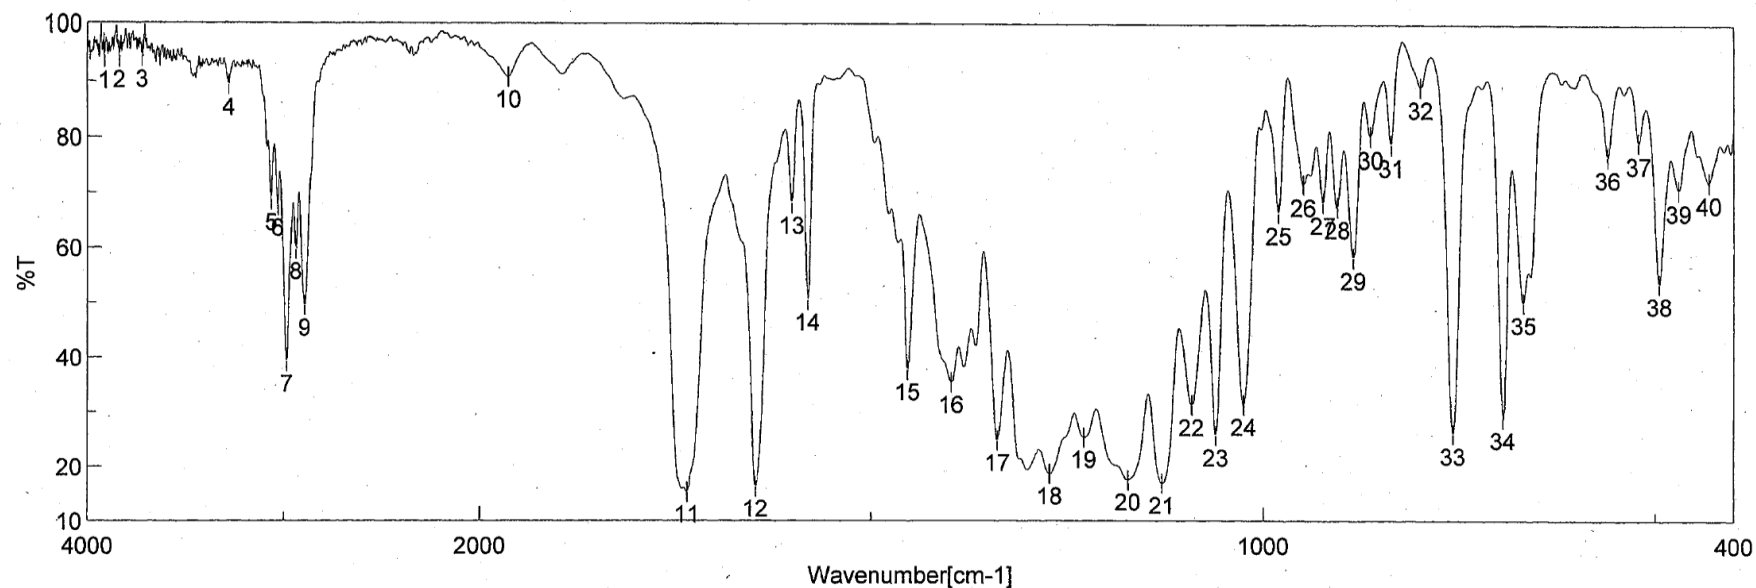

積算回数  
ゼロフィリング  
ゲイン  
測定日時  
測定者  
ファイル名  
サンプル名  
コメント

16  
ON  
16  
2016/03/30 16:44  
kawamata  
Memory#2  
aldimine6

分解  
アポダイゼーション  
スキャンスピード  
更新日時

4 cm-1  
Cosine  
2 mm/sec  
2016/03/30 16:44

|              |       |              |       |              |       |              |       |
|--------------|-------|--------------|-------|--------------|-------|--------------|-------|
| 1: 3912.86,  | 94.26 | 2: 3836.68,  | 94.34 | 3: 3720.98,  | 94.49 | 4: 3280.32,  | 89.41 |
| 5: 3065.30,  | 68.68 | 6: 3030.59,  | 67.66 | 7: 2986.23,  | 39.18 | 8: 2939.95,  | 59.72 |
| 9: 2893.66,  | 49.50 | 10: 1963.18, | 90.82 | 11: 1735.62, | 15.35 | 12: 1648.84, | 16.39 |
| 13: 1602.56, | 68.18 | 14: 1582.31, | 50.66 | 15: 1453.10, | 37.81 | 16: 1397.17, | 35.49 |
| 17: 1338.36, | 24.84 | 18: 1271.82, | 18.70 | 19: 1228.43, | 25.49 | 20: 1172.51, | 17.63 |
| 21: 1129.12, | 16.98 | 22: 1091.51, | 31.38 | 23: 1060.66, | 25.79 | 24: 1024.98, | 31.47 |
| 25: 980.63,  | 66.50 | 26: 948.81,  | 71.62 | 27: 923.74,  | 68.38 | 28: 905.42,  | 67.61 |
| 29: 885.17,  | 58.48 | 30: 862.99,  | 80.19 | 31: 836.95,  | 78.75 | 32: 799.35,  | 89.11 |
| 33: 757.89,  | 26.07 | 34: 694.25,  | 29.00 | 35: 668.21,  | 50.40 | 36: 561.18,  | 76.70 |
| 37: 521.65,  | 79.18 | 38: 495.62,  | 53.99 | 39: 470.55,  | 70.77 | 40: 431.98,  | 72.23 |

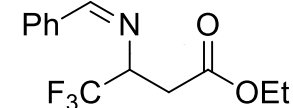

**rac-9**

<sup>1</sup>H

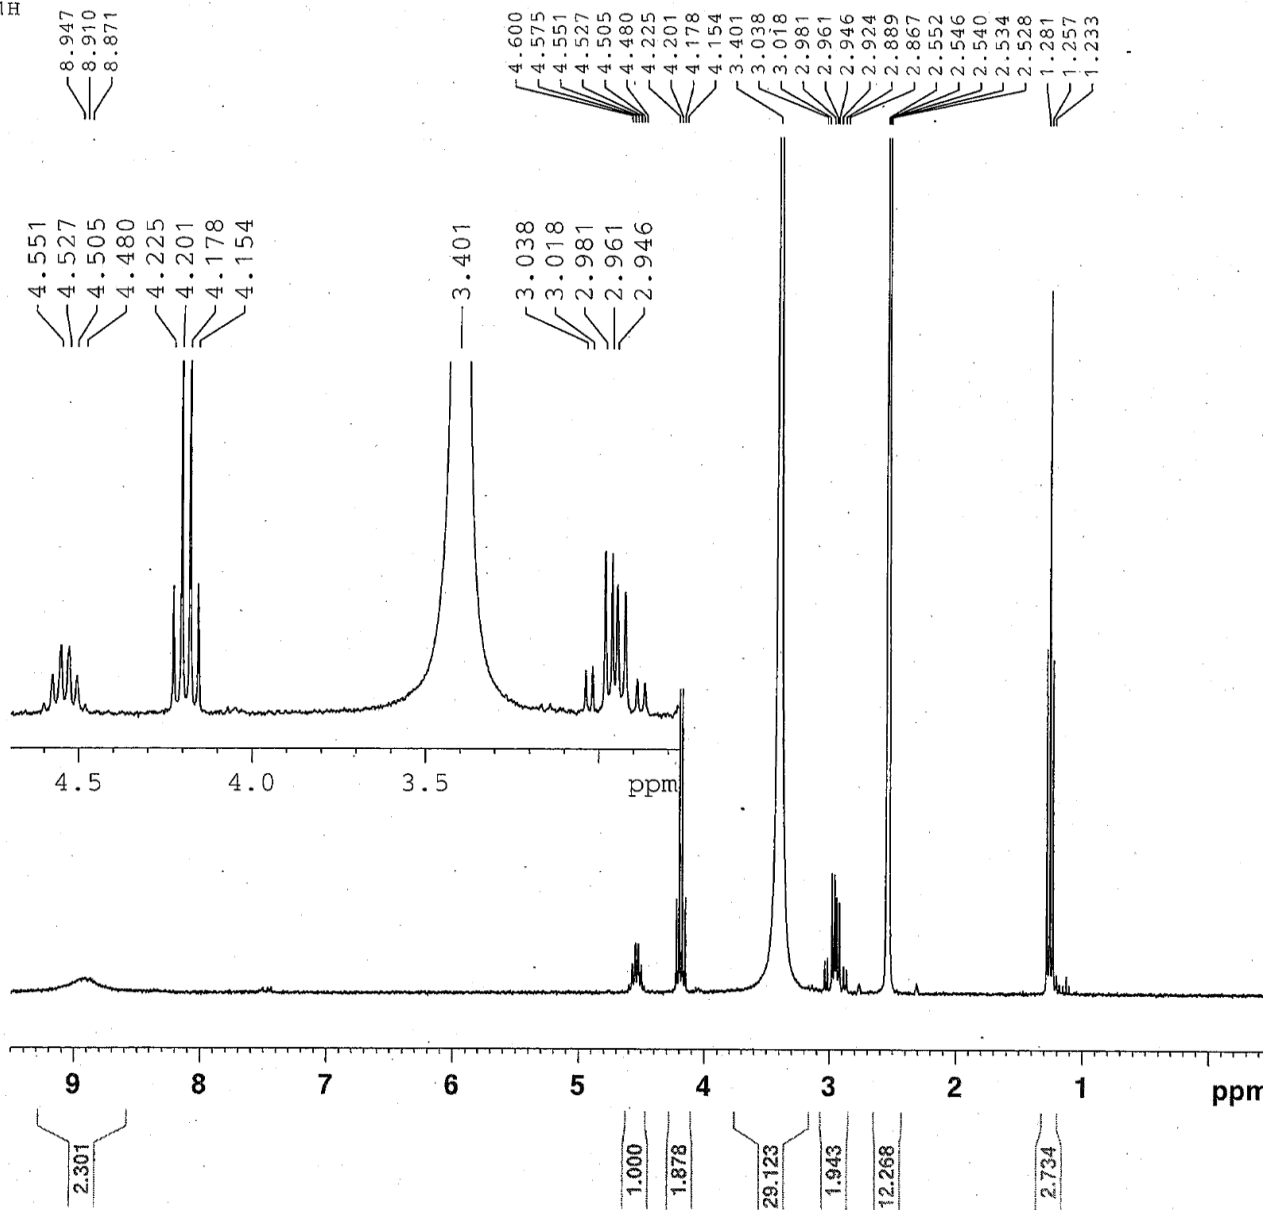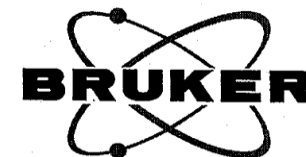

NAME A16mc211rk  
 EXPNO 16042602  
 PROCNO 1  
 Date\_ 20160426  
 Time 18.29  
 INSTRUM spect  
 PROBHD 5 mm PABBO BB-  
 PULPROG zg30  
 TD 65536  
 SOLVENT DMSO  
 NS 8  
 DS 2  
 SWH 6188.119 Hz  
 FIDRES 0.094423 Hz  
 AQ 5.2953587 sec  
 RG 203  
 DW 80.800 usec  
 DE 6.50 usec  
 TE 296.2 K  
 D1 1.0000000 sec  
 TD0 1

===== CHANNEL f1 =====  
 NUC1 <sup>1</sup>H  
 P1 15.00 usec  
 PL1 1.20 dB  
 PL1W 8.19348145 W  
 SFO1 300.1318534 MHz  
 SI 32768  
 SF 300.1299890 MHz  
 WDW EM  
 SSB 0  
 LB 0.30 Hz  
 GB 0  
 PC 1.00

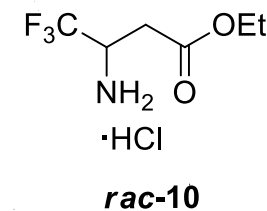

- ACCEPTANCE - System: AV300 OrderNo.: JH033009 Customer: Saitama University Engineer: IKD  
 P/N Console: Z108356/162 Shim system: BOSS I original dataset: 104275\_0150snf 3 1  
 Probe: 5 mm PABBO BB-1H/D Z-GRD Z104275/0150 Sample depth:20 Gas: air  
 Sensitivity test for 19F (additional test); Sample: 0,05% TFT in CDCl3 (P/N: Z10234)

Sino= 243:1 ( signal= -61 - -65 ppm noise= -59.08 - -60.08 ppm [1 ppm] noise range= 4.5 ppm )  
 P1= 15usec PL1= -0.3dB

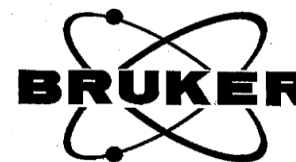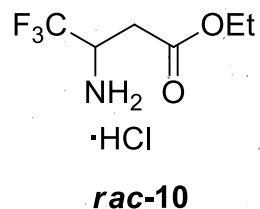

--- -76.945

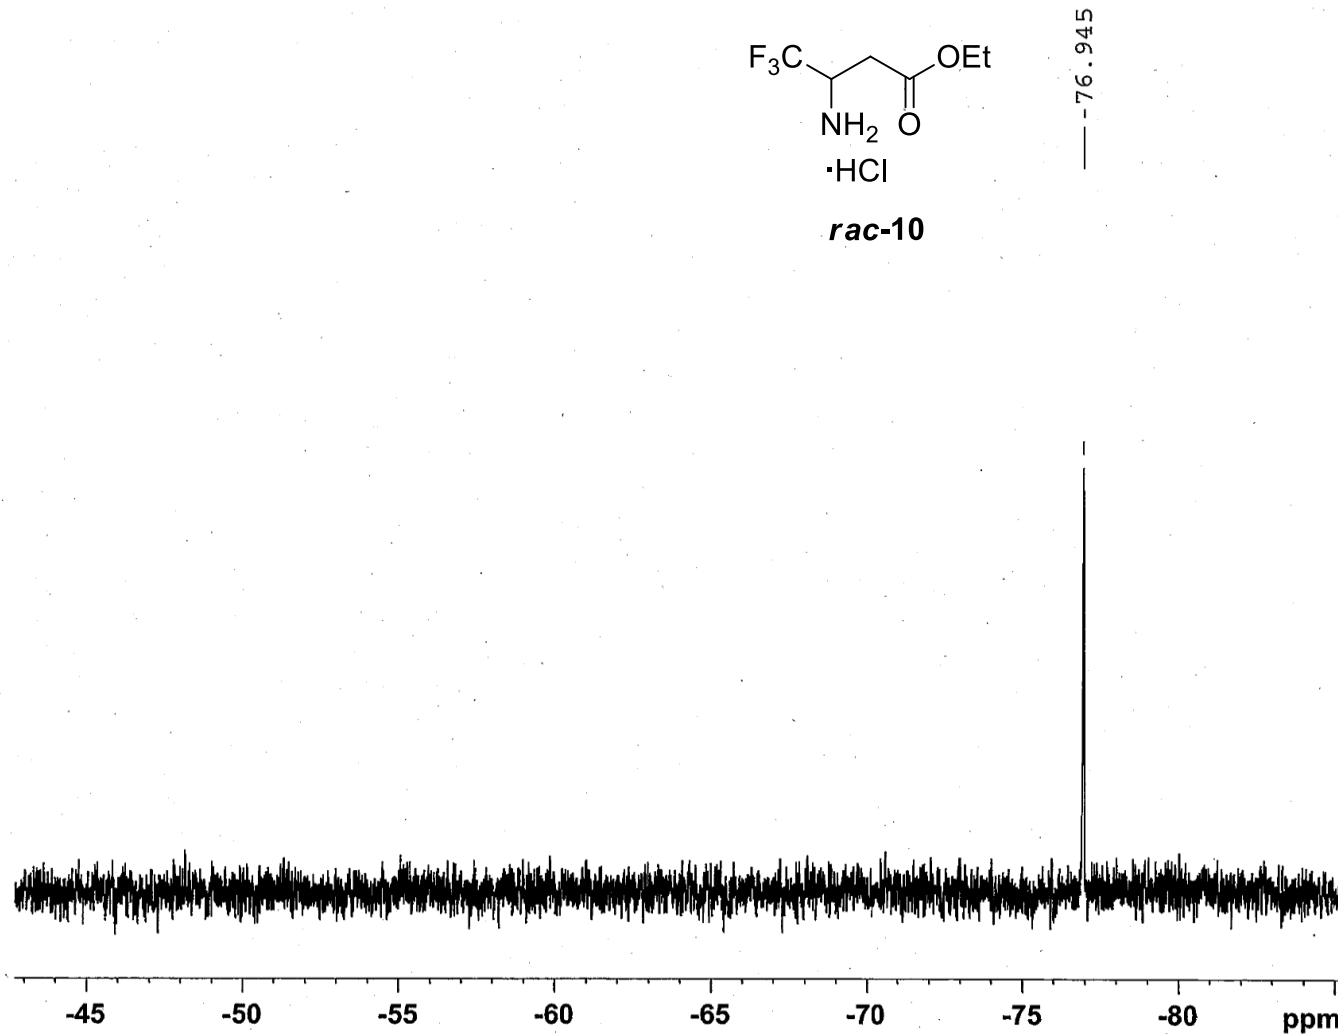

|         |                 |
|---------|-----------------|
| NAME    | A16mc211rk      |
| EXPNO   | 16051005        |
| PROCNO  | 1               |
| Date_   | 20160510        |
| Time_   | 13.22           |
| INSTRUM | spect           |
| PROBHD  | 5 mm PABBO BB-  |
| PULPROG | zgfhigqn        |
| TD      | 32768           |
| SOLVENT | CDCl3           |
| NS      | 1               |
| DS      | 0               |
| SWH     | 12019.230 Hz    |
| FIDRES  | 0.366798 Hz     |
| AQ      | 1.3631988 sec   |
| RG      | 203             |
| DW      | 41.600 usec     |
| DE      | 6.50 usec       |
| TE      | 296.3 K         |
| D1      | 10.00000000 sec |
| D11     | 0.03000000 sec  |
| D12     | 0.00002000 sec  |
| TDO     | 1               |

  

|                        |                 |
|------------------------|-----------------|
| ===== CHANNEL f1 ===== |                 |
| NUC1                   | 19F             |
| P1                     | 15.00 usec      |
| PL1                    | -0.30 dB        |
| PL1W                   | 10.09325600 W   |
| SFO1                   | 282.3865635 MHz |

  

|                        |                 |
|------------------------|-----------------|
| ===== CHANNEL f2 ===== |                 |
| CPDPRG2                | waltz16         |
| NUC2                   | 1H              |
| PCPD2                  | 80.00 usec      |
| PL2                    | 0.58 dB         |
| PL12                   | 16.50 dB        |
| PL2W                   | 9.45079708 W    |
| PL12W                  | 0.24180678 W    |
| SFO2                   | 300.1300000 MHz |
| SI                     | 16384           |
| SF                     | 282.4046279 MHz |
| WPDW                   | EM              |
| SSB                    | 0               |
| LB                     | 2.00 Hz         |
| GB                     | 0               |
| PC                     | 1.00            |

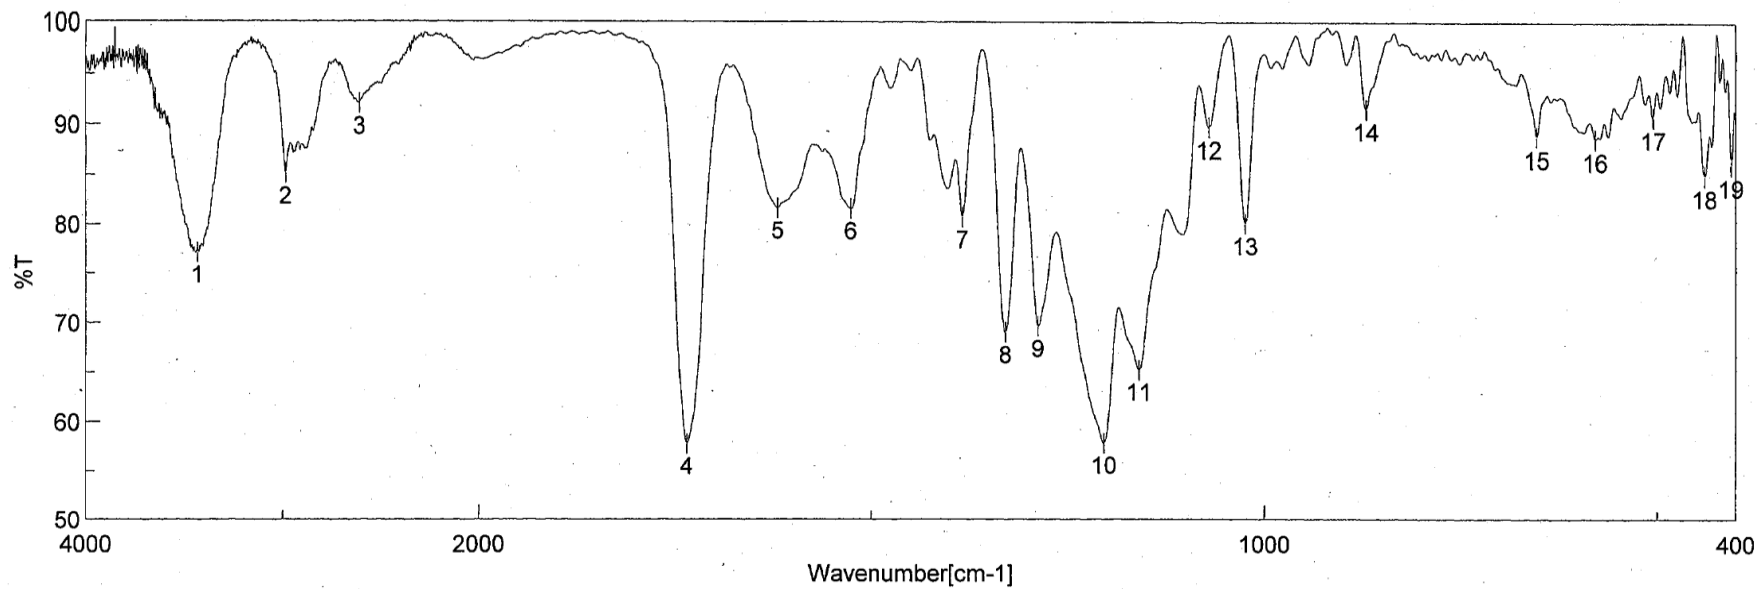

積算回数  
ゼロフィリング  
ゲイン  
測定日時  
測定者  
ファイル名  
サンプル名  
コメント

16  
ON  
16  
2016/04/27 14:07  
kawamata  
Memory#2  
ラセミ-9

分解  
アポダイゼーション  
スキャンスピード  
更新日時

4 cm-1  
Cosine  
2 mm/sec  
2016/04/27 14:10

|     |          |       |     |          |       |     |          |       |     |          |       |
|-----|----------|-------|-----|----------|-------|-----|----------|-------|-----|----------|-------|
| 1:  | 3433.64, | 77.13 | 2:  | 2985.27, | 85.13 | 3:  | 2609.22, | 92.09 | 4:  | 1735.62, | 57.78 |
| 5:  | 1619.91, | 81.73 | 6:  | 1525.42, | 81.66 | 7:  | 1383.68, | 80.81 | 8:  | 1328.71, | 69.16 |
| 9:  | 1287.25, | 69.79 | 10: | 1203.36, | 57.87 | 11: | 1159.01, | 65.35 | 12: | 1069.33, | 89.75 |
| 13: | 1024.02, | 80.21 | 14: | 869.74,  | 91.59 | 15: | 653.75,  | 88.86 | 16: | 579.50,  | 88.63 |
| 17: | 505.26,  | 90.80 | 18: | 439.69,  | 85.05 | 19: | 405.94,  | 86.12 |     |          |       |

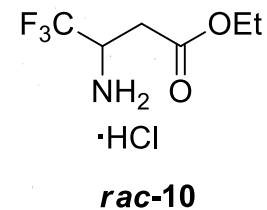

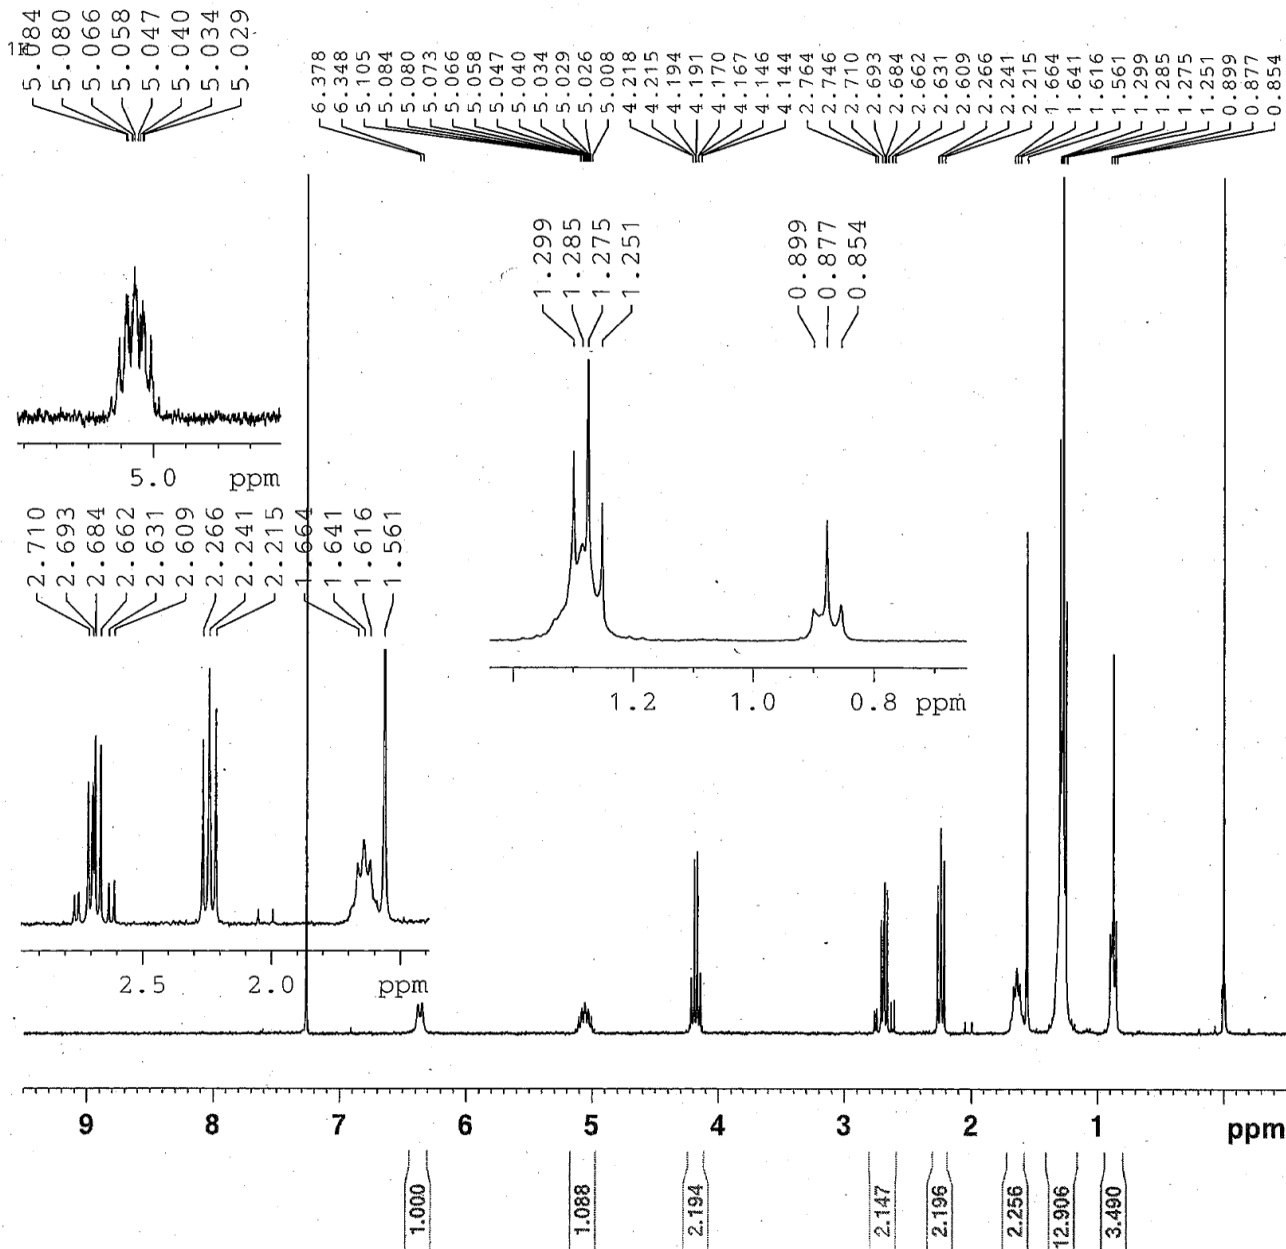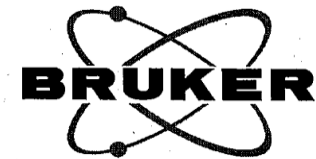

NAME A16mc211rk  
 EXPNO 16050905  
 PROCNO 1  
 Date\_ 20160509  
 Time 11.36  
 INSTRUM spect  
 PROBHD 5 mm PABBO BB-  
 PULPROG zg30  
 TD 65536  
 SOLVENT CDC13  
 NS 8  
 DS 2  
 SWH 6188.119 Hz  
 FIDRES 0.094423 Hz  
 AQ 5.2953587 sec  
 RG 203  
 DW 80.800 usec  
 DE 6.50 usec  
 TE 296.2 K  
 D1 1.0000000 sec  
 TD0 1

===== CHANNEL f1 =====  
 NUC1 1H  
 P1 15.00 usec  
 PL1 1.20 dB  
 PL1W 8.19348145 W  
 SFO1 300.1318534 MHz  
 SI 32768  
 SF 300.1300054 MHz  
 WDW EM  
 SSB 0  
 LB 0.30 Hz  
 GB 0  
 PC 1.00

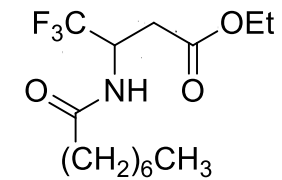

rac-11<sub>6</sub>



- ACCEPTANCE - System: AV300 OrderNo.: JH033009 Customer: Saitama University Engineer: IKD  
 P/N Console: Z108356/162 Shim system: BOSS I original dataset: 104275\_0150snf 3 1  
 Probe: 5 mm PABBO BB-1H/D Z-GRD Z104275/0150 Sample depth:20 Gas: air  
 Sensitivity test for 19F (additional test); Sample: 0,05% TFT in CDC13 (P/N: Z10234)

Sino= 243:1 ( signal= -61 - -65 ppm noise= -59.08 - -60.08 ppm [1 ppm] noise range= 4.5 ppm )  
 P1= 15usec PL1= -0.3dB

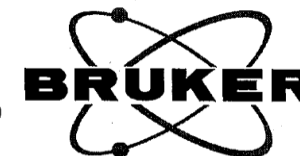

|         |                 |
|---------|-----------------|
| NAME    | A16mc211rk      |
| EXPNO   | 16050903        |
| PROCNO  | 1               |
| Date_   | 20160509        |
| Time    | 11.31           |
| INSTRUM | spect           |
| PROBHD  | 5 mm PABBO BB-  |
| PULPROG | zgfhigqn        |
| TD      | 32768           |
| SOLVENT | CDC13           |
| NS      | 1               |
| DS      | 0               |
| SWH     | 12019.230 Hz    |
| FIDRES  | 0.366798 Hz     |
| AQ      | 1.3631988 sec   |
| RG      | 203             |
| DW      | 41.600 usec     |
| DE      | 6.50 usec       |
| TE      | 296.2 K         |
| D1      | 10.00000000 sec |
| D11     | 0.03000000 sec  |
| D12     | 0.00002000 sec  |
| TD0     | 1               |

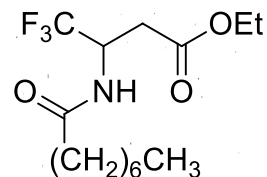

*rac*-11<sub>6</sub>

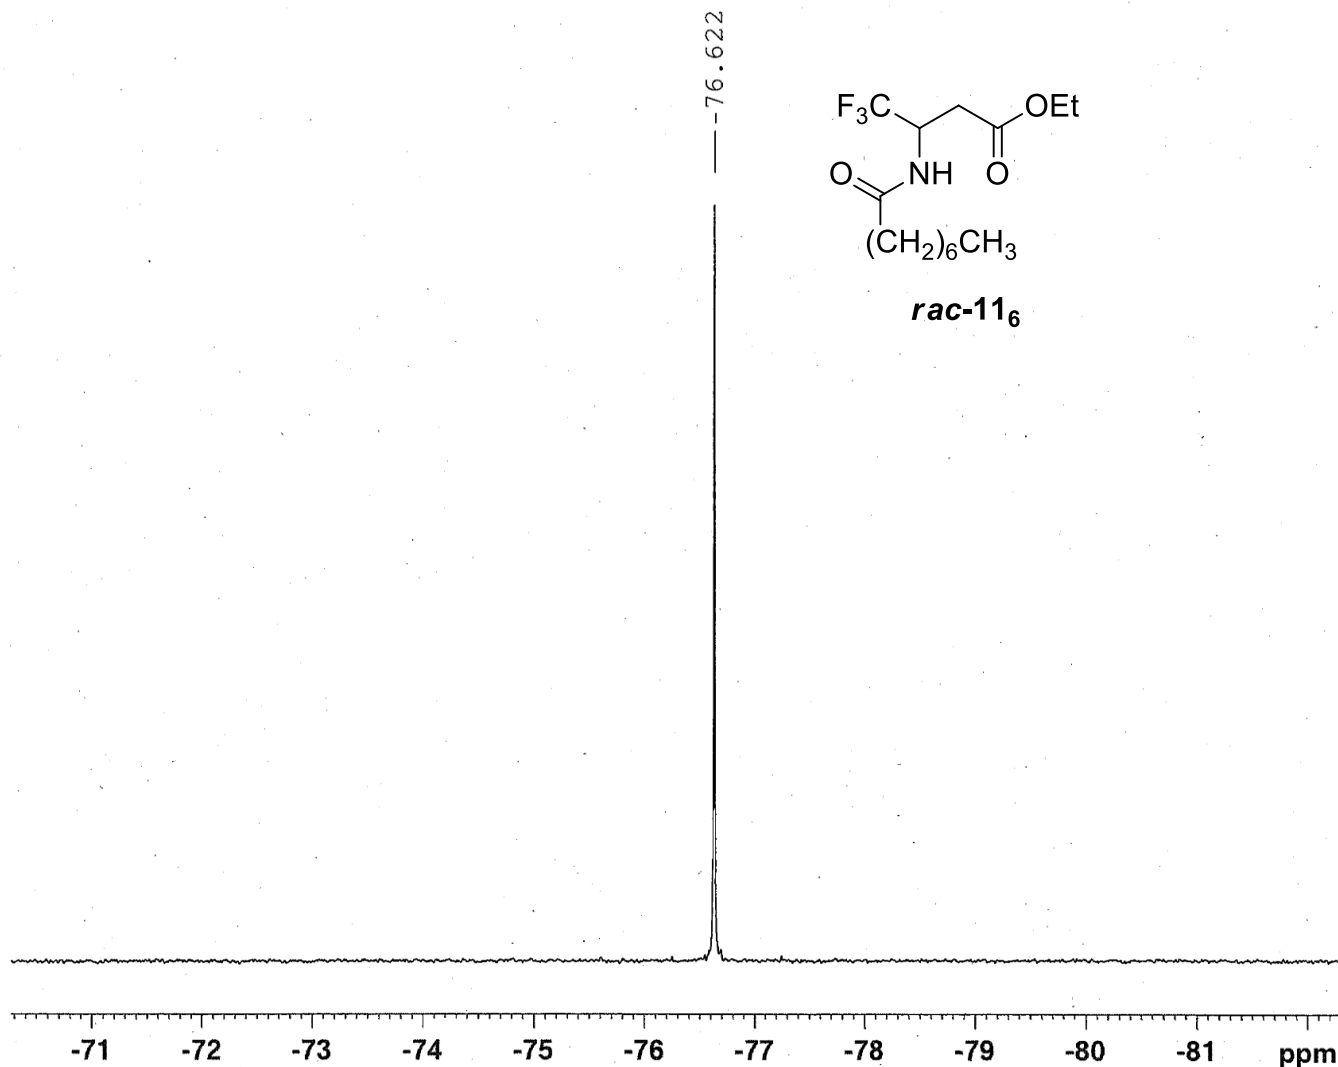

==== CHANNEL f1 =====  
 NUC1 19F  
 P1 15.00 usec  
 PL1 -0.30 dB  
 PL1W 10.09325600 W  
 SFO1 282.3865635 MHz

==== CHANNEL f2 =====  
 CPDPRG2 waltz16  
 NUC2 1H  
 PCPD2 80.00 usec  
 PL2 0.58 dB  
 PL12 16.50 dB  
 PL2W 9.45079708 W  
 PL12W 0.24180678 W  
 SFO2 300.1300000 MHz  
 SI 16384  
 SF 282.4046280 MHz  
 WDW EM  
 SSB 0  
 LB 2.00 Hz  
 GB 0  
 PC 1.00

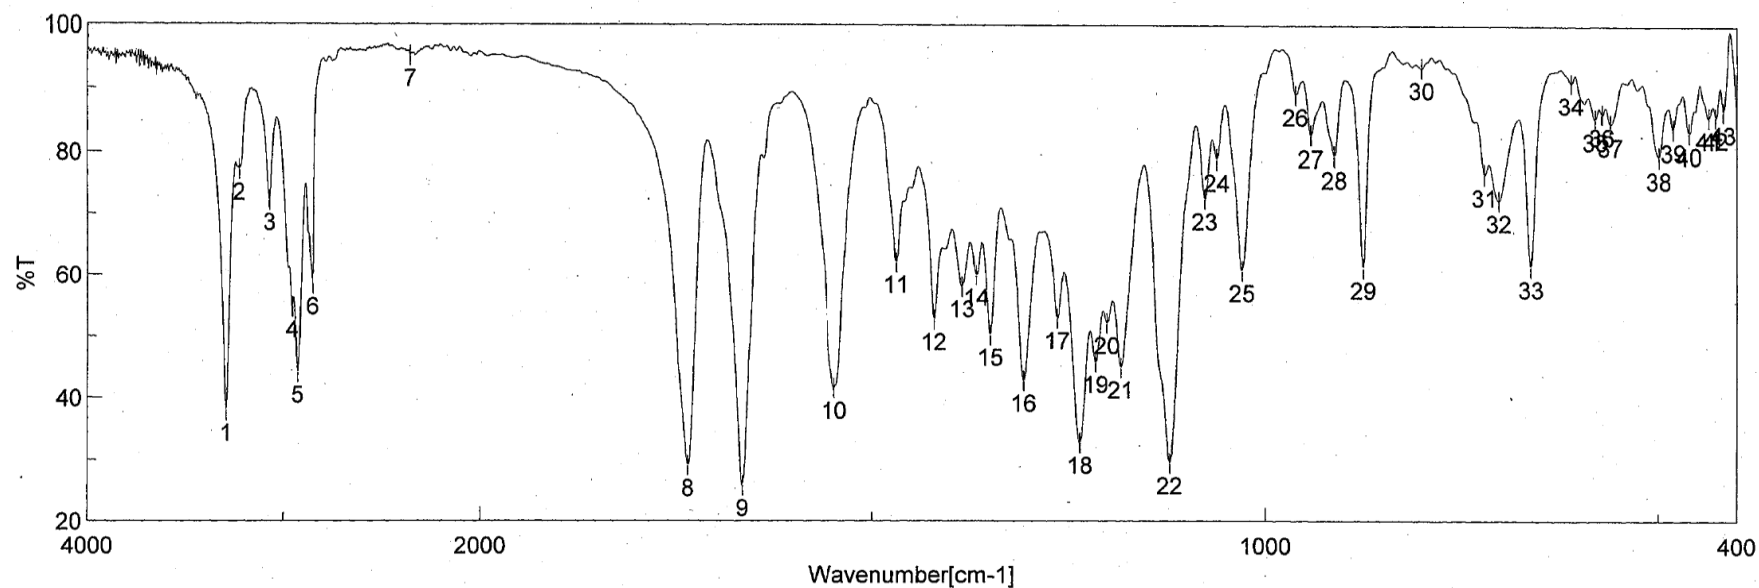

積算回数  
ゼロフィリング  
ゲイン  
測定日時  
測定者  
ファイル名  
サンプル名  
コメント

16  
ON  
16  
2016/05/10 9:51  
kawamata  
Memory#2  
rac-10

分解  
アポダイゼーション  
スキャンスピード  
更新日時

4 cm-1  
Cosine  
2 mm/sec  
2016/05/10 9:53

|              |       |              |       |              |       |              |       |
|--------------|-------|--------------|-------|--------------|-------|--------------|-------|
| 1: 3293.82,  | 37.86 | 2: 3226.33,  | 77.11 | 3: 3073.01,  | 72.17 | 4: 2956.34,  | 54.74 |
| 5: 2928.38,  | 44.09 | 6: 2851.24,  | 58.48 | 7: 2354.66,  | 95.19 | 8: 1735.62,  | 29.01 |
| 9: 1666.20,  | 25.76 | 10: 1548.56, | 41.59 | 11: 1469.49, | 62.21 | 12: 1421.28, | 52.82 |
| 13: 1385.60, | 58.19 | 14: 1367.28, | 60.11 | 15: 1349.93, | 50.33 | 16: 1307.50, | 42.85 |
| 17: 1265.07, | 53.05 | 18: 1236.15, | 32.75 | 19: 1215.90, | 45.90 | 20: 1201.43, | 52.29 |
| 21: 1184.08, | 45.05 | 22: 1121.40, | 29.48 | 23: 1077.05, | 72.51 | 24: 1061.62, | 78.72 |
| 25: 1029.80, | 60.93 | 26: 961.34,  | 88.95 | 27: 942.06,  | 82.43 | 28: 912.16,  | 79.21 |
| 29: 875.52,  | 61.42 | 30: 801.28,  | 93.34 | 31: 721.25,  | 76.41 | 32: 702.93,  | 72.29 |
| 33: 662.43,  | 61.61 | 34: 611.32,  | 90.95 | 35: 580.47,  | 85.08 | 36: 571.79,  | 85.86 |
| 37: 561.18,  | 84.32 | 38: 499.47,  | 79.15 | 39: 481.15,  | 83.45 | 40: 460.90,  | 82.91 |

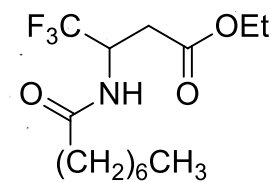

rac-11<sub>6</sub>

1H

5.046  
5.038  
5.030  
5.023  
5.015  
5.009  
5.002  
4.994  
4.987  
4.979  
4.971  
4.870  
4.870  
3.313  
3.309  
3.306  
3.303  
3.300  
2.813  
2.805  
2.780  
2.772  
2.624  
2.604  
2.591  
2.571  
2.228  
2.213  
2.198  
2.163  
1.615  
1.601  
1.587  
1.573  
1.312  
1.308  
1.301  
0.910  
0.896  
0.882

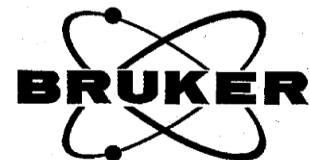

NAME A16mc211rk  
EXPNO 17092502  
PROCNO 1  
Date\_ 20170925  
Time 10.01  
INSTRUM spect  
PROBHD 5 mm PABBO BB-  
PULPROG zg30  
TD 65536  
SOLVENT MeOD  
NS 8  
DS 2  
SWH 10330.578 Hz  
FIDRES 0.157632 Hz  
AQ 3.1719923 sec  
RG 101  
DW 48.400 usec  
DE 6.50 usec  
TE 300.0 K  
D1 1.00000000 sec  
TD0 1

==== CHANNEL f1 =====  
NUC1 1H  
P1 11.80 usec  
PL1 2.40 dB  
PL1W 15.17711735 W  
SFO1 500.0330885 MHz  
SI 32768  
SF 500.0300103 MHz  
WDW EM  
SSB 0  
LB 0.30 Hz  
GB 0  
PC 1.00

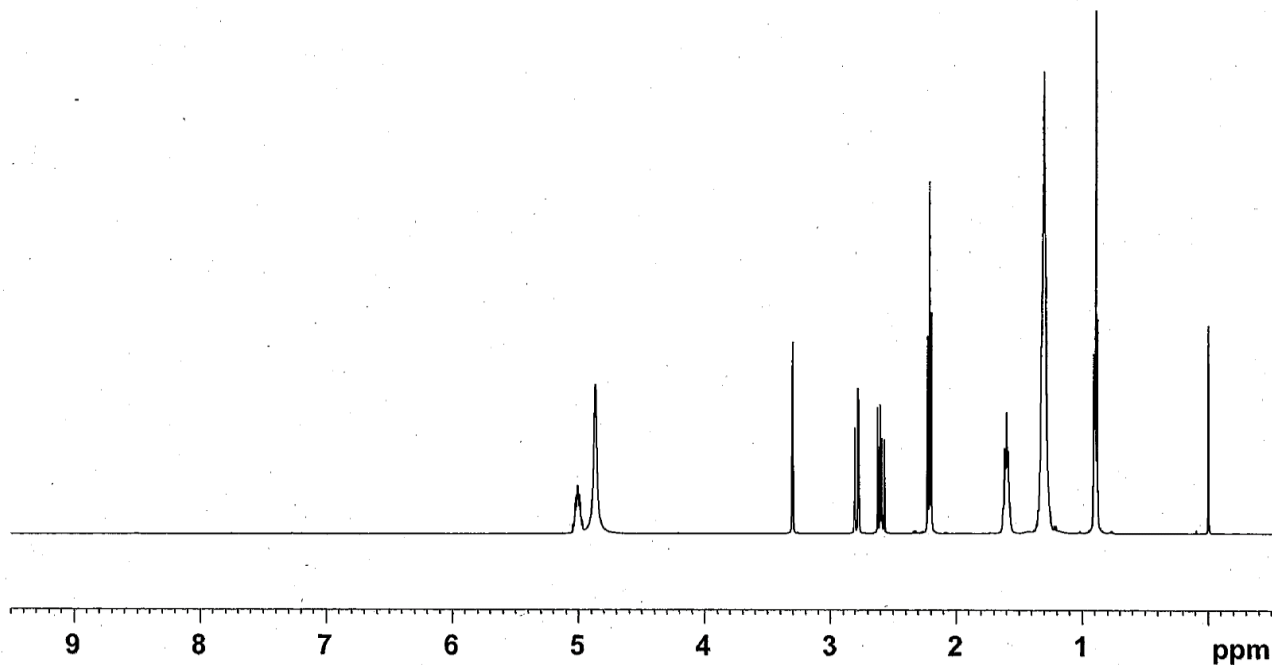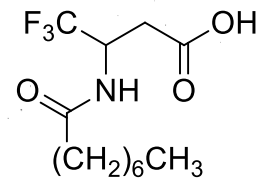

rac-1<sub>6</sub>

- ACCEPTANCE - System: AV300 OrderNo.: JH033009 Customer: Saitama University Engineer: IKD  
 P/N Console: Z108356/162 Shim system: BOSS I original dataset: 104275\_0150snf 3 1  
 Probe: 5 mm PABBO BB-1H/D Z-GRD Z104275/0150 Sample depth:20 Gas: air  
 Sensitivity test for 19F (additional test); Sample: 0,05% TFT in CDCl3 (P/N: Z10234)

Sino= 243:1 ( signal= -61 - -65 ppm noise= -59.08 - -60.08 ppm [1 ppm] noise range= 4.5 ppm )  
 P1= 15usec PL1= -0.3dB

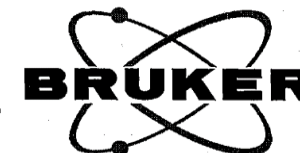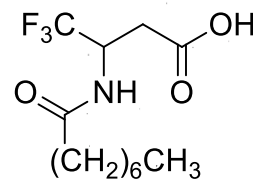

rac-1<sub>6</sub>

---76.945

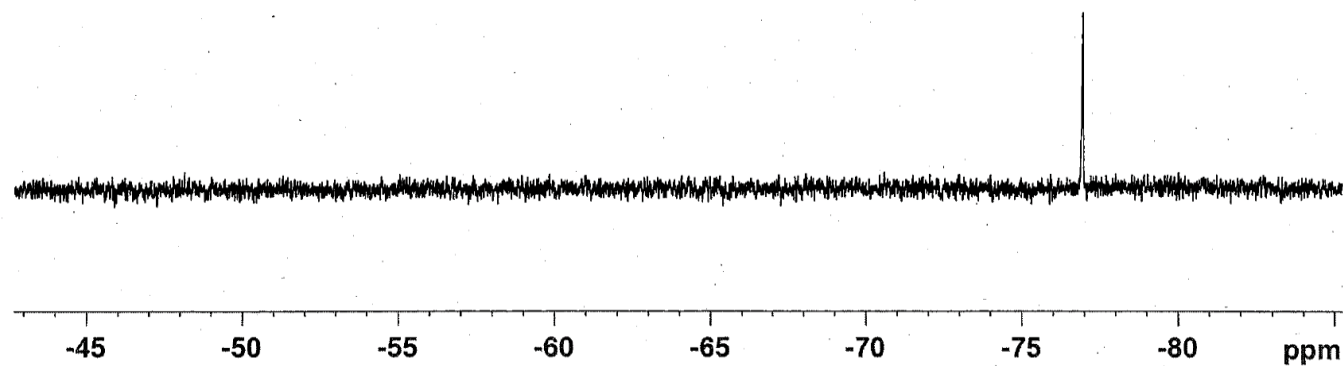

|         |                 |
|---------|-----------------|
| NAME    | A16mc211rk      |
| EXPNO   | 16051005        |
| PROCNO  | 1               |
| Date_   | 20160510        |
| Time    | 13.22           |
| INSTRUM | spect           |
| PROBHD  | 5 mm PABBO BB-  |
| PULPROG | zgfhigqn        |
| TD      | 32768           |
| SOLVENT | CDCl3           |
| NS      | 1               |
| DS      | 0               |
| SWH     | 12019.230 Hz    |
| FIDRES  | 0.366798 Hz     |
| AQ      | 1.3631988 sec   |
| RG      | 203             |
| DW      | 41.600 usec     |
| DE      | 6.50 usec       |
| TE      | 296.3 K         |
| D1      | 10.00000000 sec |
| D11     | 0.03000000 sec  |
| D12     | 0.00002000 sec  |
| TD0     | 1               |

==== CHANNEL f1 =====

|      |                 |
|------|-----------------|
| NUC1 | 19F             |
| P1   | 15.00 usec      |
| PL1  | -0.30 dB        |
| PL1W | 10.09325600 W   |
| SFO1 | 282.3865635 MHz |

==== CHANNEL f2 =====

|         |                 |
|---------|-----------------|
| CPDPRG2 | waltz16         |
| NUC2    | 1H              |
| PCPD2   | 80.00 usec      |
| PL2     | 0.58 dB         |
| PL12    | 16.50 dB        |
| PL2W    | 9.45079708 W    |
| PL12W   | 0.24180678 W    |
| SFO2    | 300.1300000 MHz |
| SI      | 16384           |
| SF      | 282.4046279 MHz |
| WDW     | EM              |
| SSB     | 0               |
| LB      | 2.00 Hz         |
| GB      | 0               |
| PC      | 1.00            |

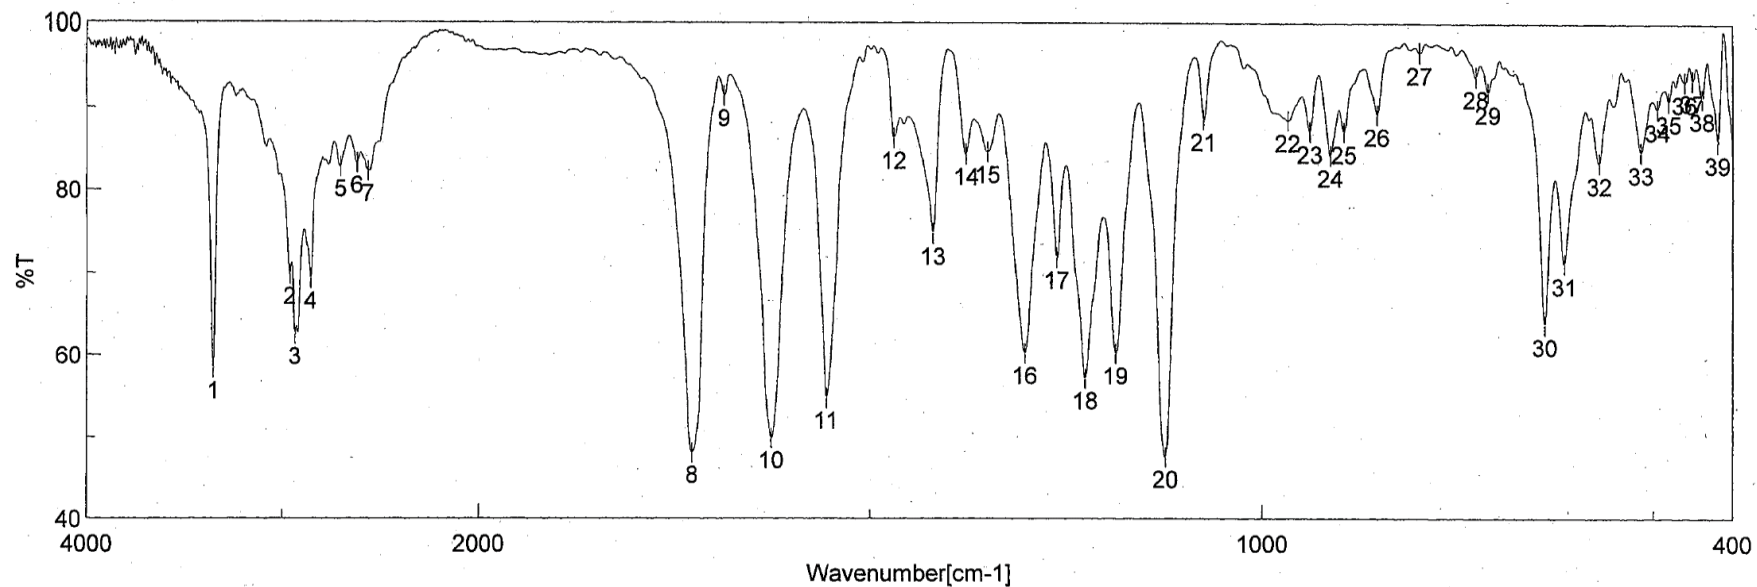

積算回数  
ゼロフィリング  
ゲイン  
測定日時  
測定者  
ファイル名  
サンプル名  
コメント

16  
ON  
8  
2016/05/10 10:13  
kawamata  
Memory#2  
rac-1-C8

分解  
アポダイゼーション  
スキャンスピード  
更新日時

4 cm-1  
Cosine  
2 mm/sec  
2016/05/10 10:14

|              |       |              |       |              |       |              |       |
|--------------|-------|--------------|-------|--------------|-------|--------------|-------|
| 1: 3353.60,  | 58.32 | 2: 2963.09,  | 69.89 | 3: 2937.06,  | 62.51 | 4: 2857.02,  | 69.36 |
| 5: 2704.67,  | 82.83 | 6: 2619.82,  | 83.30 | 7: 2564.86,  | 82.28 | 8: 1727.91,  | 48.05 |
| 9: 1686.44,  | 91.44 | 10: 1626.66, | 49.86 | 11: 1556.27, | 54.74 | 12: 1469.49, | 86.34 |
| 13: 1419.35, | 74.84 | 14: 1376.93, | 84.40 | 15: 1348.96, | 84.66 | 16: 1301.72, | 60.28 |
| 17: 1261.22, | 71.96 | 18: 1224.58, | 57.18 | 19: 1186.01, | 60.25 | 20: 1122.37, | 47.51 |
| 21: 1074.16, | 88.58 | 22: 967.13,  | 88.47 | 23: 939.16,  | 87.12 | 24: 913.13,  | 84.25 |
| 25: 895.77,  | 87.07 | 26: 853.35,  | 89.18 | 27: 799.35,  | 96.66 | 28: 727.03,  | 93.79 |
| 29: 711.60,  | 91.92 | 30: 639.29,  | 63.85 | 31: 614.22,  | 71.30 | 32: 569.86,  | 83.36 |
| 33: 516.83,  | 84.66 | 34: 495.62,  | 89.86 | 35: 481.15,  | 90.84 | 36: 460.90,  | 93.20 |
| 37: 451.26,  | 93.43 | 38: 438.73,  | 91.20 | 39: 419.44,  | 85.90 |              |       |

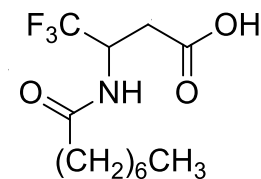

rac-1<sub>6</sub>

1H

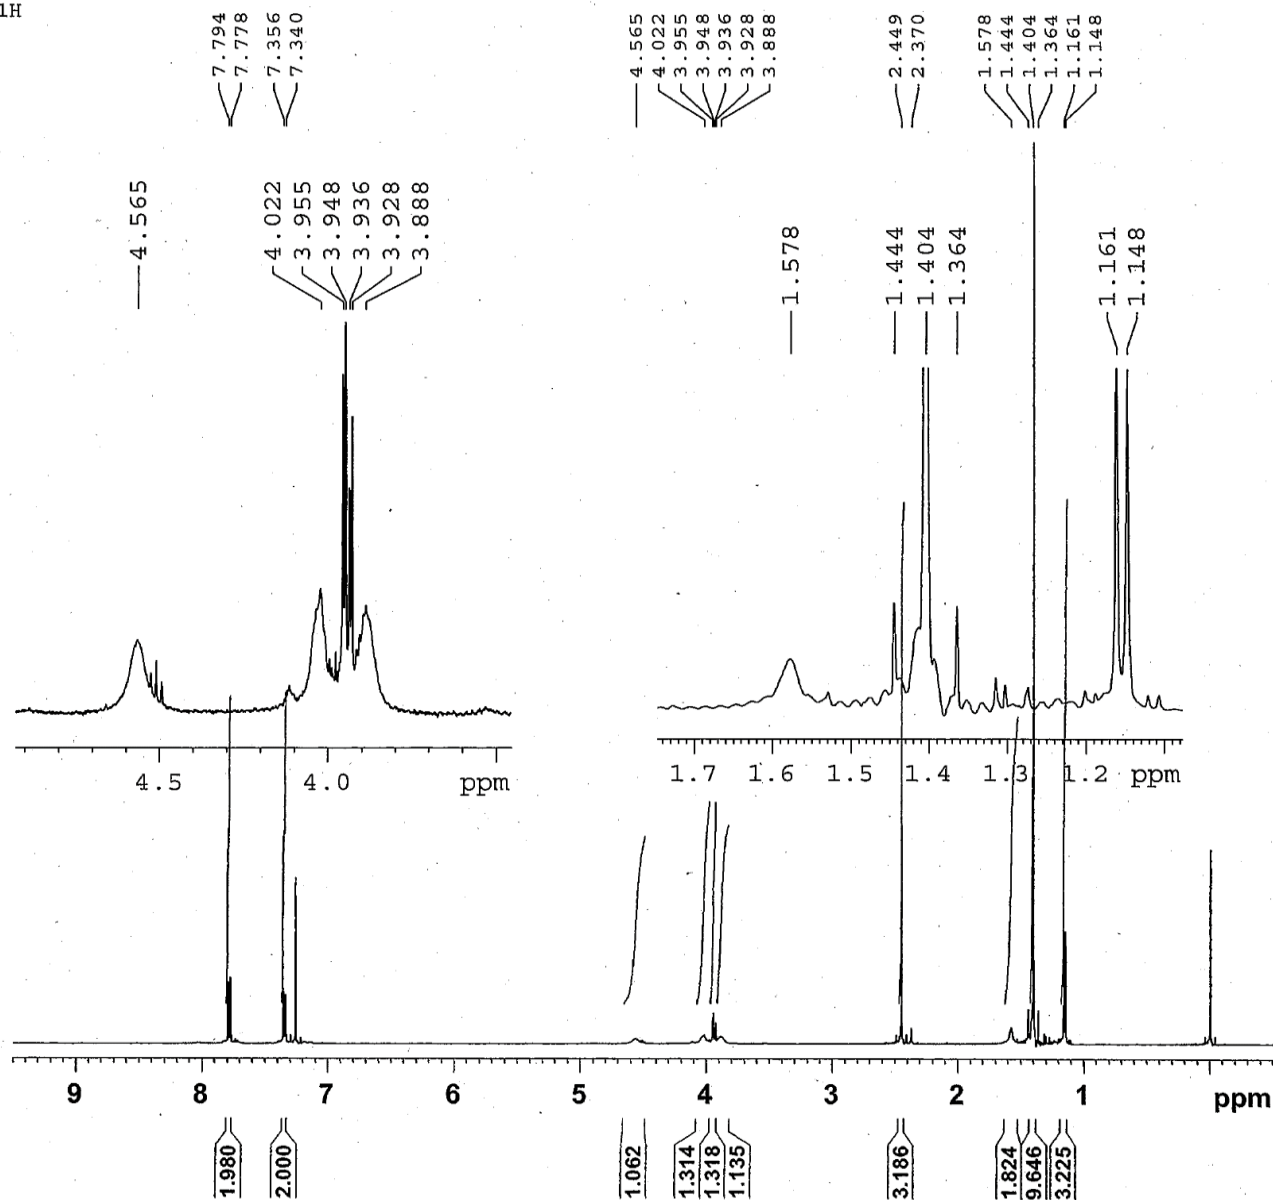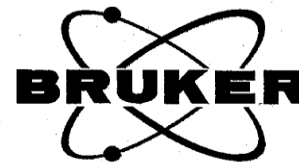

NAME A16mc211rk  
 EXPNO 16052301  
 PROCNO 1  
 Date 20160523  
 Time 14.16  
 INSTRUM spect  
 PROBHD 5 mm PABBO BB-  
 PULPROG zg30  
 TD 65536  
 SOLVENT CDCl3  
 NS 8  
 DS 2  
 SWH 10330.578 Hz  
 FIDRES 0.157632 Hz  
 AQ 3.1719923 sec  
 RG 203  
 DW 48.400 usec  
 DE 6.50 usec  
 TE 300.3 K  
 D1 1.00000000 sec  
 TDO 1

==== CHANNEL f1 =====  
 NUC1 1H  
 P1 11.80 usec  
 PL1 2.40 dB  
 PL1W 15.17711735 W  
 SFO1 500.0330885 MHz  
 SI 32768  
 SF 500.0300109 MHz  
 WDW EM  
 SSB 0  
 LB 0.30 Hz  
 GB 0  
 PC 1.00

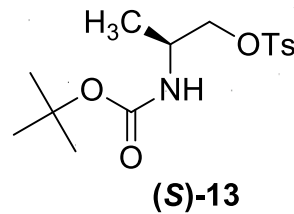

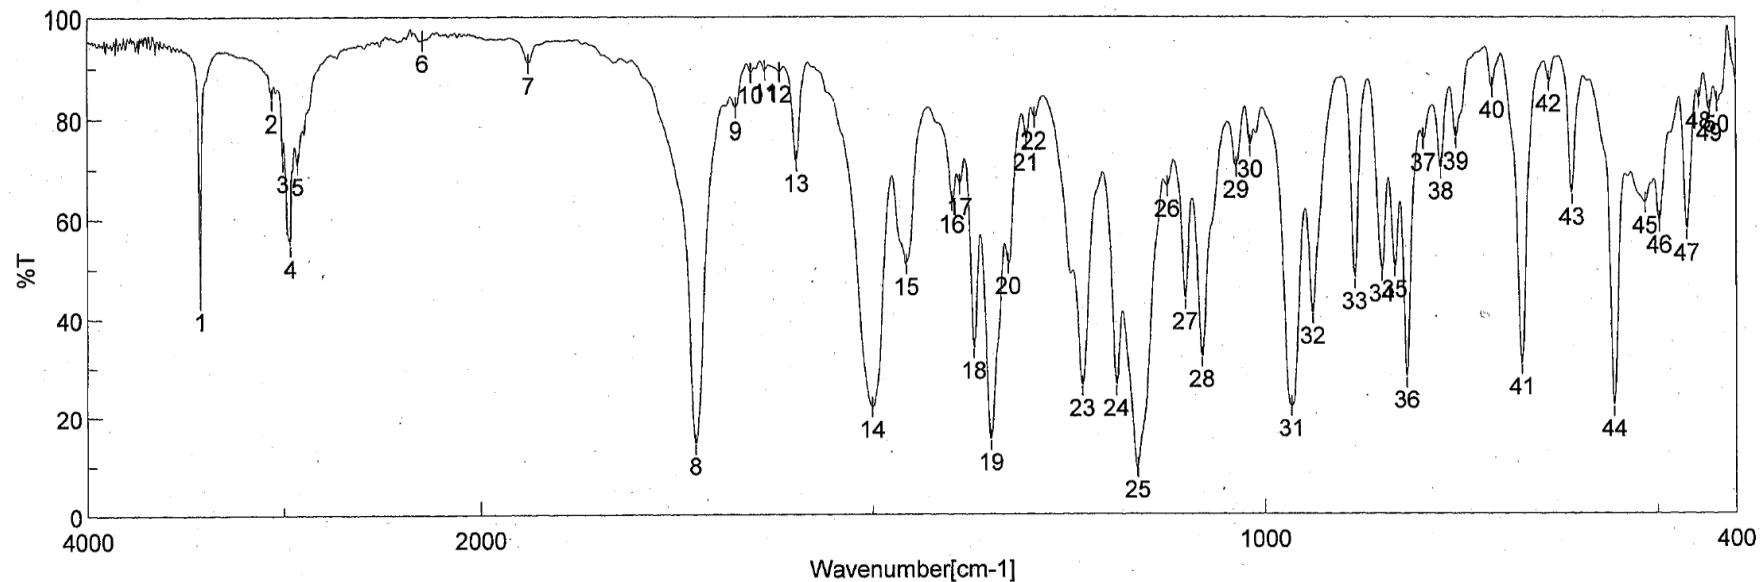

積算回数  
ゼロフィリング  
ゲイン  
測定日時  
測定者  
ファイル名  
サンプル名  
コメント

16  
ON  
8  
2016/06/03 14:25  
kawamata  
Memory#2  
tosylate

分解  
アボダイゼーション  
スキャンスピード  
更新日時

4 cm-1  
Cosine  
2 mm/sec  
2016/06/03 14:26

|              |       |              |       |              |       |              |       |
|--------------|-------|--------------|-------|--------------|-------|--------------|-------|
| 1: 3425.92,  | 44.11 | 2: 3060.48,  | 83.71 | 3: 3005.52,  | 71.70 | 4: 2967.91,  | 54.76 |
| 5: 2929.34,  | 71.09 | 6: 2292.95,  | 95.52 | 7: 1938.11,  | 90.97 | 8: 1725.98,  | 14.48 |
| 9: 1673.91,  | 82.01 | 10: 1654.62, | 89.05 | 11: 1636.30, | 89.56 | 12: 1617.98, | 89.22 |
| 13: 1596.77, | 71.64 | 14: 1500.35, | 21.97 | 15: 1456.96, | 51.09 | 16: 1398.14, | 63.41 |
| 17: 1388.50, | 66.85 | 18: 1371.14, | 33.97 | 19: 1348.96, | 15.23 | 20: 1326.79, | 51.22 |
| 21: 1303.64, | 75.79 | 22: 1293.04, | 79.97 | 23: 1232.29, | 26.28 | 24: 1188.90, | 26.27 |
| 25: 1161.90, | 9.51  | 26: 1123.33, | 66.50 | 27: 1101.15, | 44.03 | 28: 1079.94, | 32.21 |
| 29: 1035.59, | 70.32 | 30: 1018.23, | 74.47 | 31: 966.16,  | 22.13 | 32: 939.16,  | 41.08 |
| 33: 886.13,  | 48.19 | 34: 851.42,  | 49.73 | 35: 835.03,  | 50.61 | 36: 819.60,  | 27.91 |
| 37: 798.39,  | 75.75 | 38: 776.21,  | 70.03 | 39: 756.92,  | 75.96 | 40: 710.64,  | 86.00 |

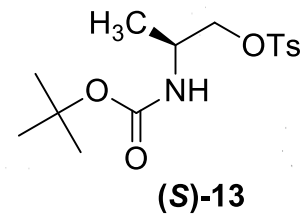

1H

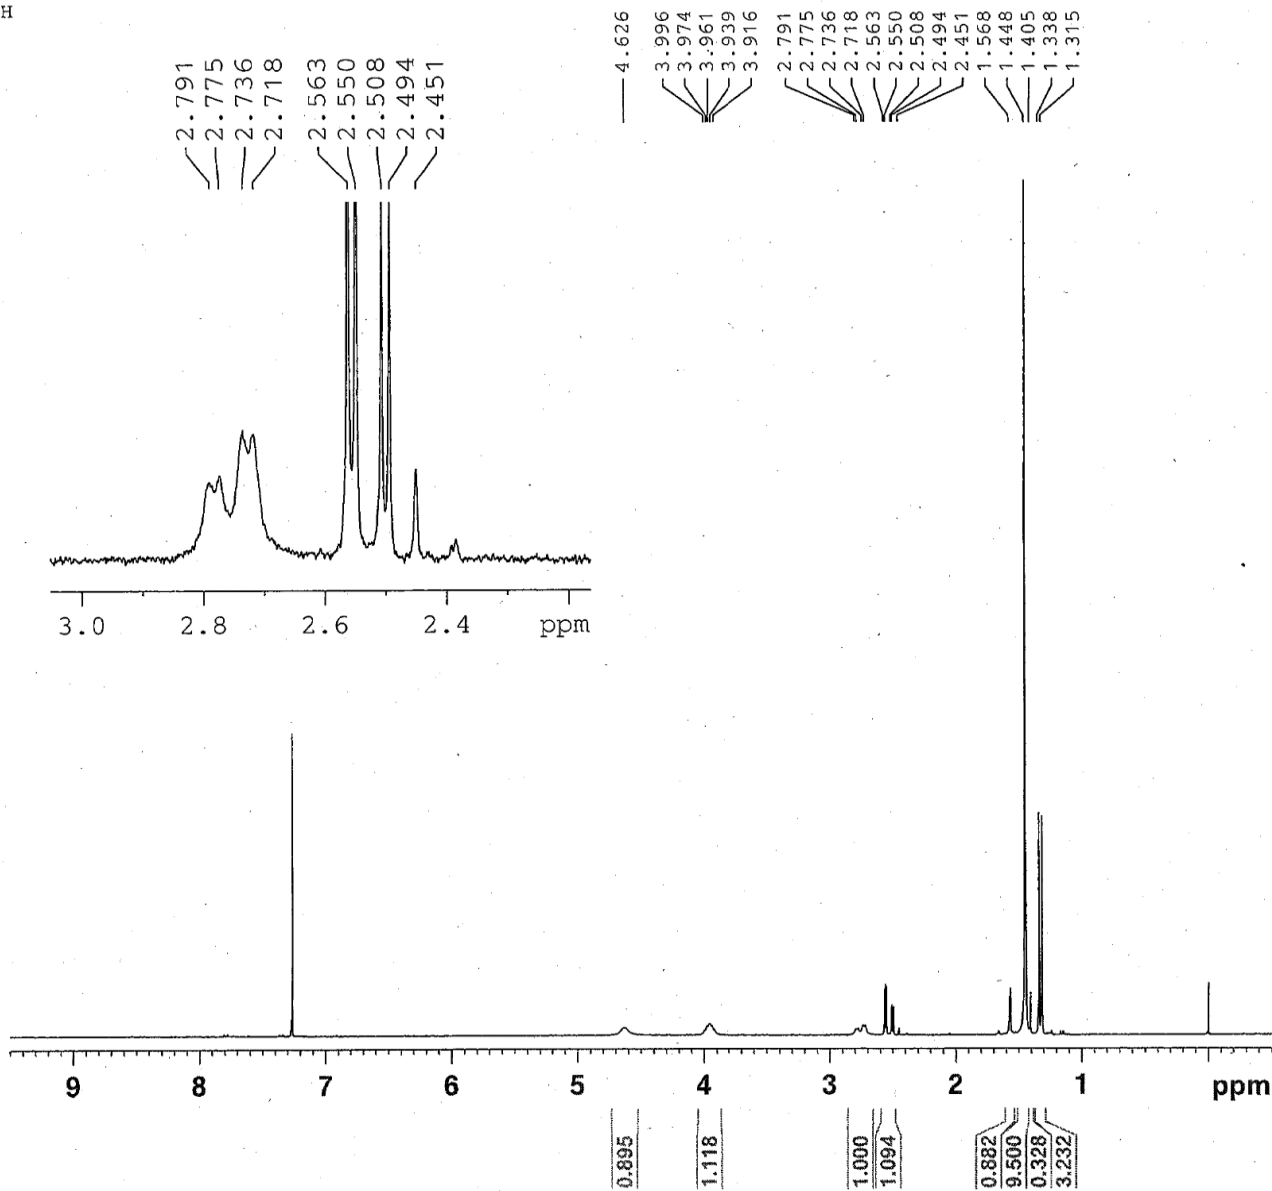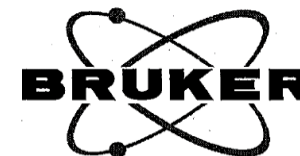

NAME A16mc211rk  
EXPNO 16062601  
PROCNO 1  
Date\_ 20160526  
Time 10.15  
INSTRUM spect  
PROBHD 5 mm PABBO BB-  
PULPROG zg30  
TD 65536  
SOLVENT CDCl3  
NS 8  
DS 2  
SWH 6188.119 Hz  
FIDRES 0.094423 Hz  
AQ 5.2953587 sec  
RG 203  
DW 80.800 usec  
DE 6.50 usec  
TE 296.2 K  
D1 1.00000000 sec  
TD0 1

===== CHANNEL f1 =====  
NUC1 1H  
P1 15.00 usec  
PL1 1.20 dB  
PL1W 8.19348145 W  
SFO1 300.1318534 MHz  
SI 32768  
SF 300.1300052 MHz  
WDW EM  
SSB 0  
LB 0.30 Hz  
GB 0  
PC 1.00

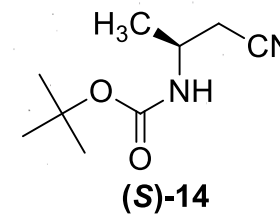



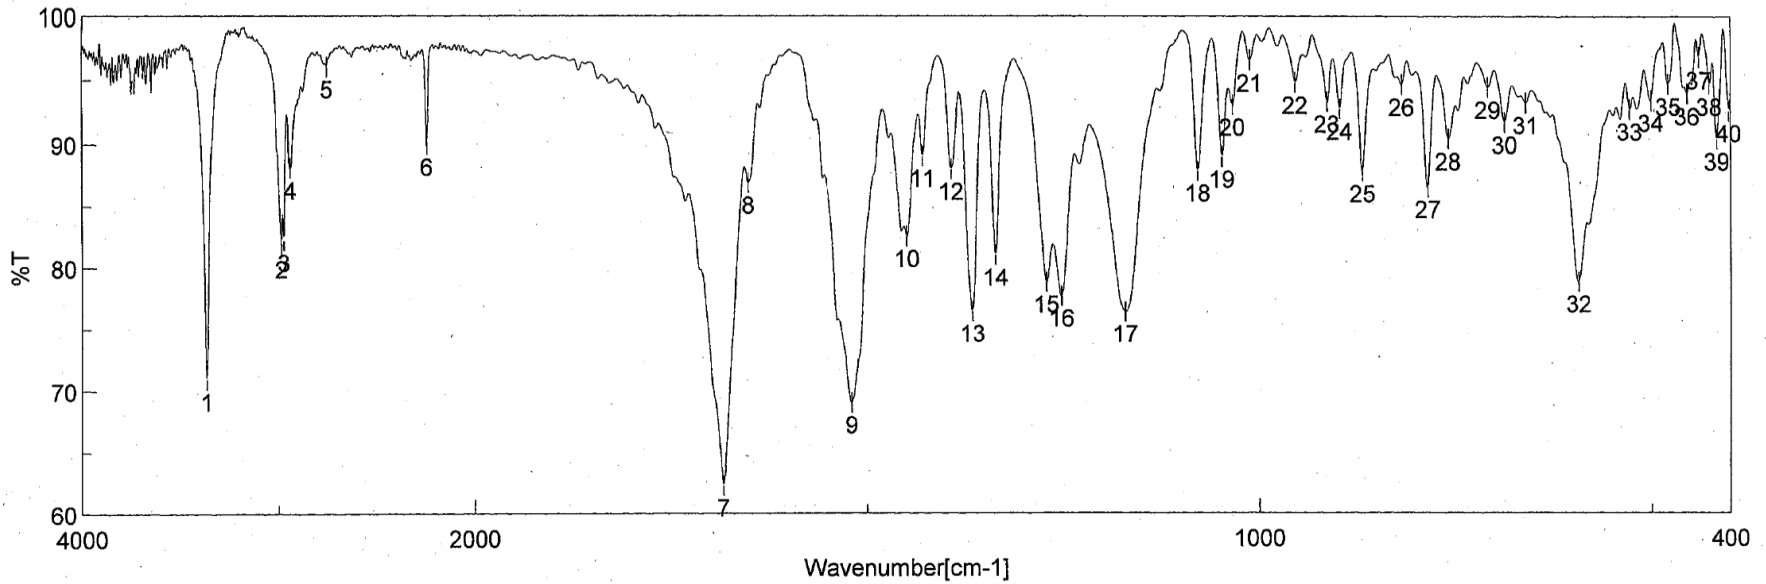

積算回数  
ゼロフィリング  
ゲイン  
測定日時  
測定者  
ファイル名  
サンプル名  
コメント

16  
ON  
8  
2016/06/03 14:38  
kawamata  
Memory#2  
nitrile

分解  
アポダイゼーション  
スキャンスピード  
更新日時

4 cm-1  
Cosine  
2 mm/sec  
2016/06/03 14:39

|     |          |       |     |          |       |     |          |       |     |          |       |
|-----|----------|-------|-----|----------|-------|-----|----------|-------|-----|----------|-------|
| 1:  | 3367.10, | 70.93 | 2:  | 2988.16, | 81.73 | 3:  | 2975.62, | 82.27 | 4:  | 2943.80, | 88.11 |
| 5:  | 2756.74, | 96.10 | 6:  | 2245.70, | 90.00 | 7:  | 1683.55, | 62.29 | 8:  | 1651.73, | 86.90 |
| 9:  | 1519.63, | 69.06 | 10: | 1449.24, | 82.63 | 11: | 1428.99, | 89.04 | 12: | 1392.35, | 87.99 |
| 13: | 1365.35, | 76.51 | 14: | 1335.46, | 81.13 | 15: | 1270.86, | 78.93 | 16: | 1251.58, | 77.78 |
| 17: | 1170.58, | 76.51 | 18: | 1078.01, | 87.85 | 19: | 1047.16, | 88.98 | 20: | 1033.66, | 93.10 |
| 21: | 1011.48, | 96.61 | 22: | 953.63,  | 94.87 | 23: | 913.13,  | 93.36 | 24: | 896.74,  | 92.79 |
| 25: | 867.81,  | 87.80 | 26: | 817.67,  | 94.71 | 27: | 784.89,  | 86.55 | 28: | 758.85,  | 90.38 |
| 29: | 708.71,  | 94.49 | 30: | 687.50,  | 91.70 | 31: | 660.50,  | 93.26 | 32: | 593.97,  | 79.01 |
| 33: | 528.40,  | 92.75 | 34: | 501.40,  | 93.49 | 35: | 479.22,  | 94.77 | 36: | 455.12,  | 94.02 |
| 37: | 440.65,  | 96.86 | 38: | 427.16,  | 94.77 | 39: | 417.51,  | 90.38 | 40: | 402.09,  | 92.64 |

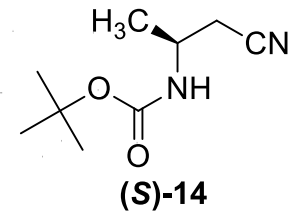

1H

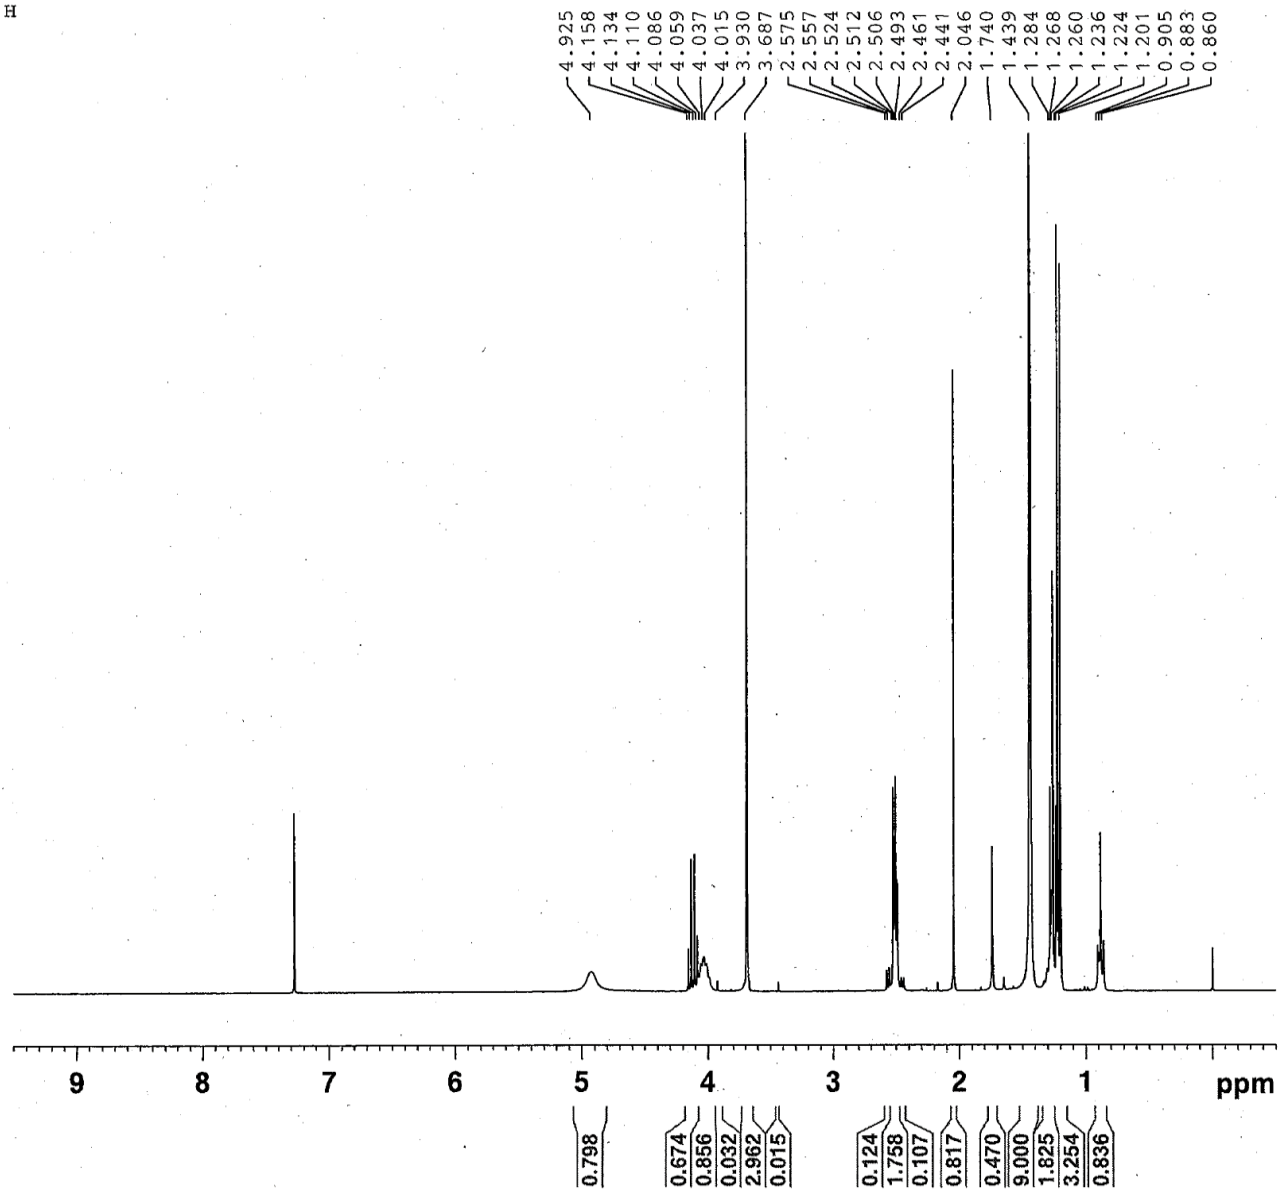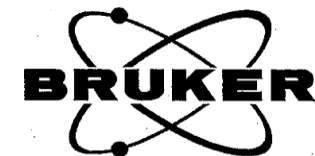

NAME A16mc211  
EXPNO 16072901  
PROCNO 1  
Date\_ 20160729  
Time 14.47  
INSTRUM spect  
PROBHD 5 mm PABBO BB-  
PULPROG zg30  
TD 65536  
SOLVENT CDCl3  
NS 8  
DS 2  
SWH 6188.119 Hz  
FIDRES 0.094423 Hz  
AQ 5.2953587 sec  
RG 114  
DW 80.800 usec  
DE 6.50 usec  
TE 296.8 K  
D1 1.00000000 sec  
TD0 1

==== CHANNEL f1 =====  
NUC1 1H  
P1 15.00 usec  
PL1 1.20 dB  
PL1W 8.19348145 W  
SFO1 300.1318534 MHz  
SI 32768  
SF 300.1300013 MHz  
WDW EM  
SSB 0  
LB 0.30 Hz  
GB 0  
PC 1.00

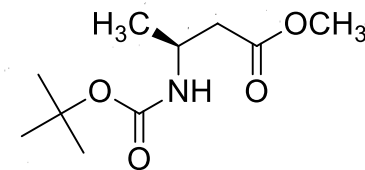

(S)-15

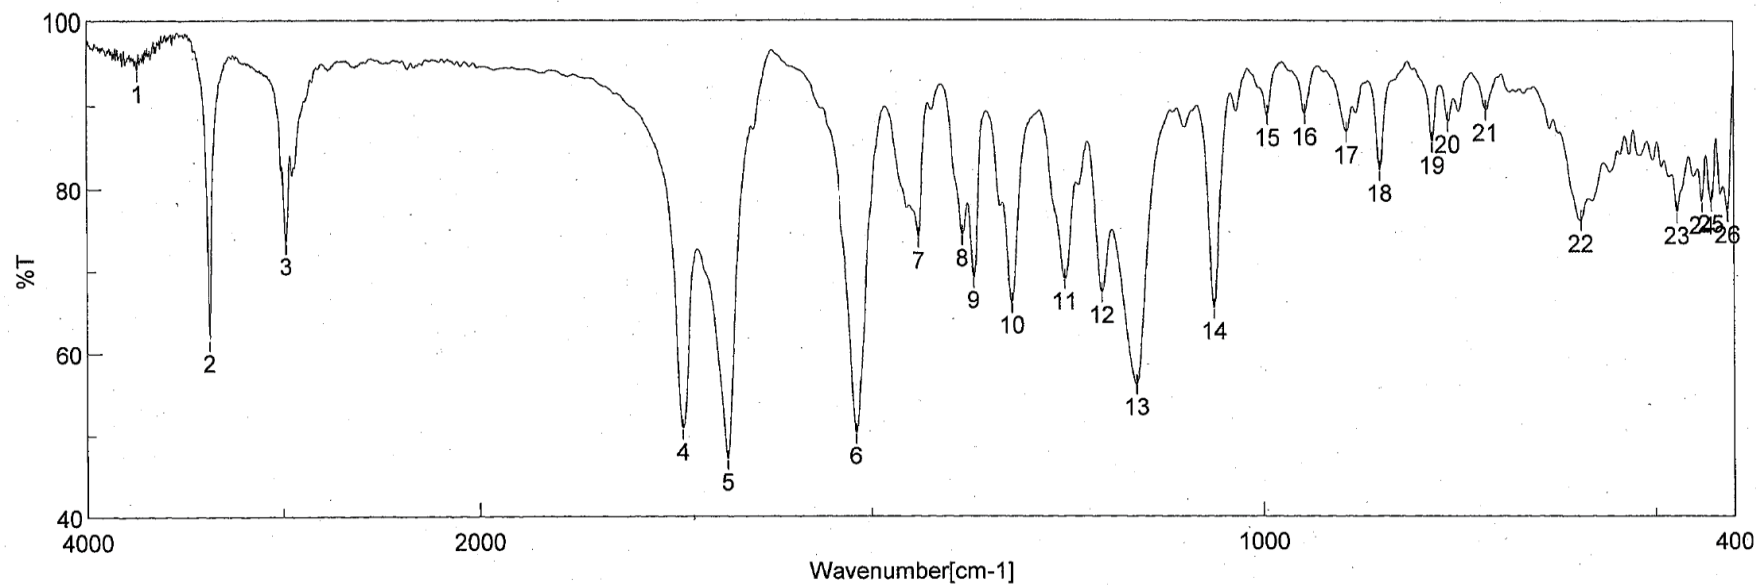

積算回数  
ゼロフィリング  
ゲイン  
測定日時  
測定者  
ファイル名  
サンプル名  
コメント

12  
ON  
8  
2016/08/02 17:28  
kawamata  
boc methyl ether  
Boc Na

分解  
アボダイゼーション  
スキャンスピード  
更新日時

4 cm-1  
Cosine  
2 mm/sec  
2016/08/02 17:41

|              |       |              |       |              |       |              |       |
|--------------|-------|--------------|-------|--------------|-------|--------------|-------|
| 1: 3742.19,  | 94.19 | 2: 3374.82,  | 61.55 | 3: 2986.23,  | 73.38 | 4: 1741.41,  | 50.70 |
| 5: 1684.52,  | 46.93 | 6: 1519.63,  | 50.21 | 7: 1439.60,  | 74.12 | 8: 1383.68,  | 74.44 |
| 9: 1369.21,  | 69.28 | 10: 1320.04, | 66.22 | 11: 1252.54, | 69.15 | 12: 1205.29, | 67.49 |
| 13: 1160.94, | 56.19 | 14: 1062.59, | 65.52 | 15: 994.12,  | 88.89 | 16: 946.88,  | 89.01 |
| 17: 893.84,  | 86.84 | 18: 851.42,  | 82.19 | 19: 784.89,  | 85.63 | 20: 764.64,  | 88.11 |
| 21: 716.43,  | 89.49 | 22: 594.93,  | 76.17 | 23: 472.47,  | 77.17 | 24: 440.65,  | 78.37 |
| 25: 429.08,  | 78.53 | 26: 407.87,  | 77.31 |              |       |              |       |

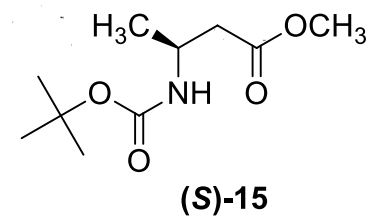

1H

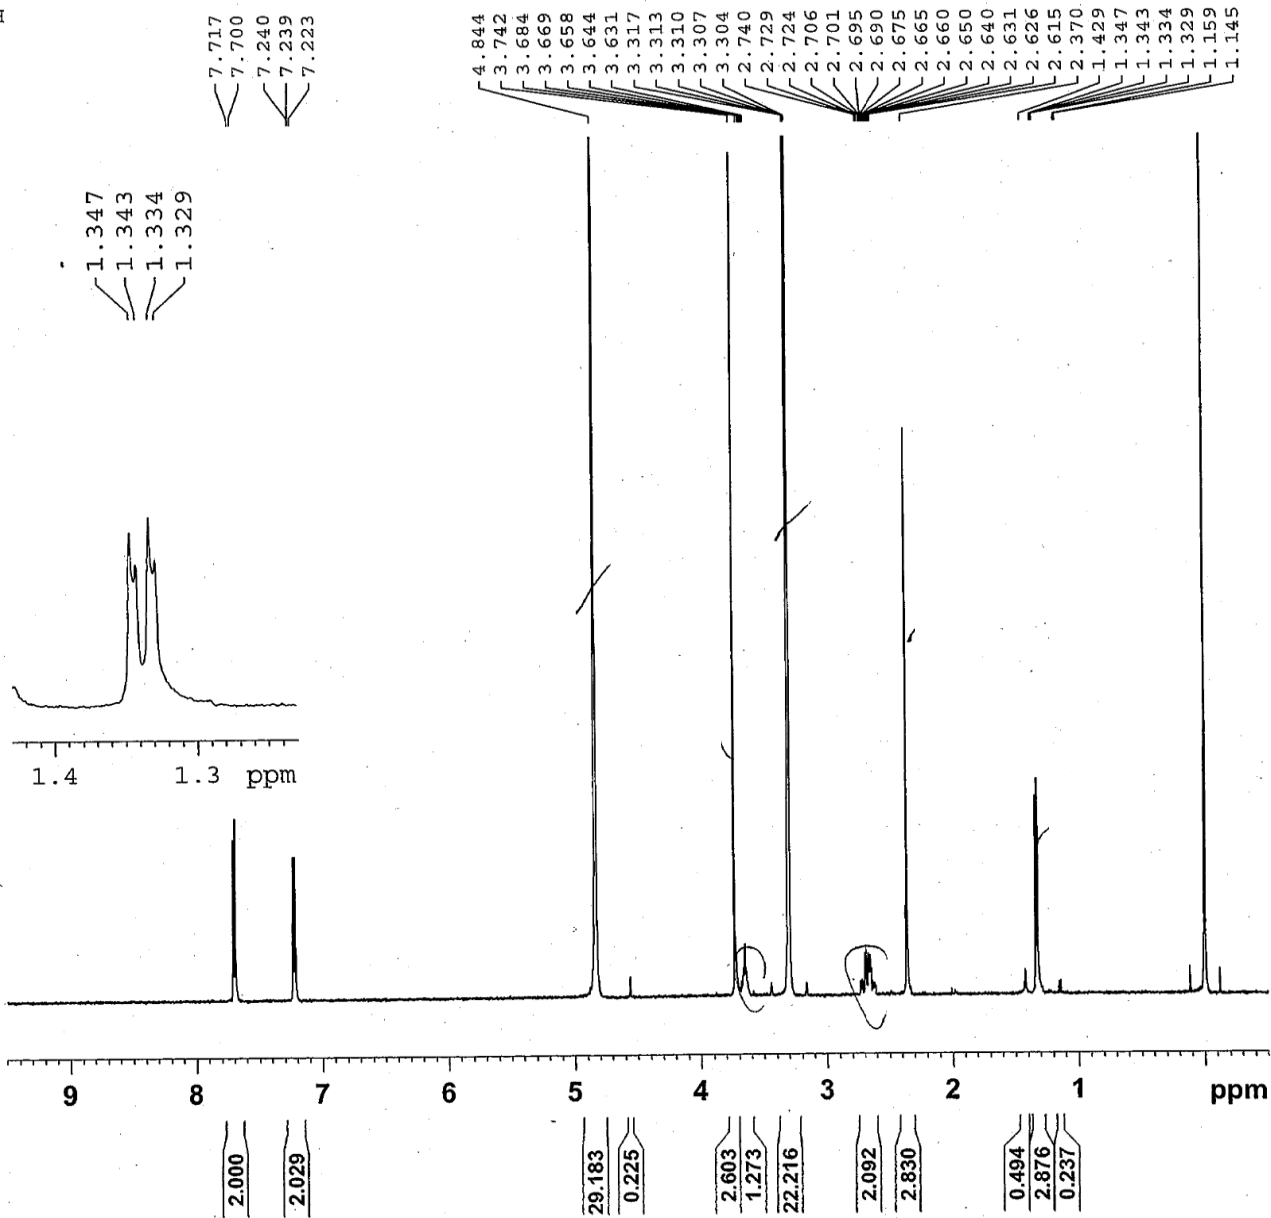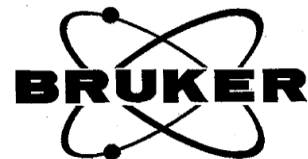

NAME 16mc211rk  
 EXPNO 16080302  
 PROCNO 1  
 Date 20160803  
 Time 11.22  
 INSTRUM spect  
 PROBHD 5 mm PABBO BB-  
 PULPROG zg30  
 TD 65536  
 SOLVENT MeOD  
 NS 8  
 DS 2  
 SWH 10330.578 Hz  
 FIDRES 0.157632 Hz  
 AQ 3.1719923 sec  
 RG 203  
 DW 48.400 usec  
 DE 6.50 usec  
 TE 300.7 K  
 D1 1.00000000 sec  
 TDO 1

==== CHANNEL f1 =====  
 NUC1 1H  
 P1 11.80 usec  
 PL1 2.40 dB  
 PL1W 15.17711735 W  
 SFO1 500.0330885 MHz  
 SI 32768  
 SF 500.0300083 MHz  
 WDW EM  
 SSB 0  
 LB 0.30 Hz  
 GB 0  
 PC 1.00

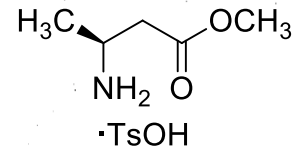

(S)-16

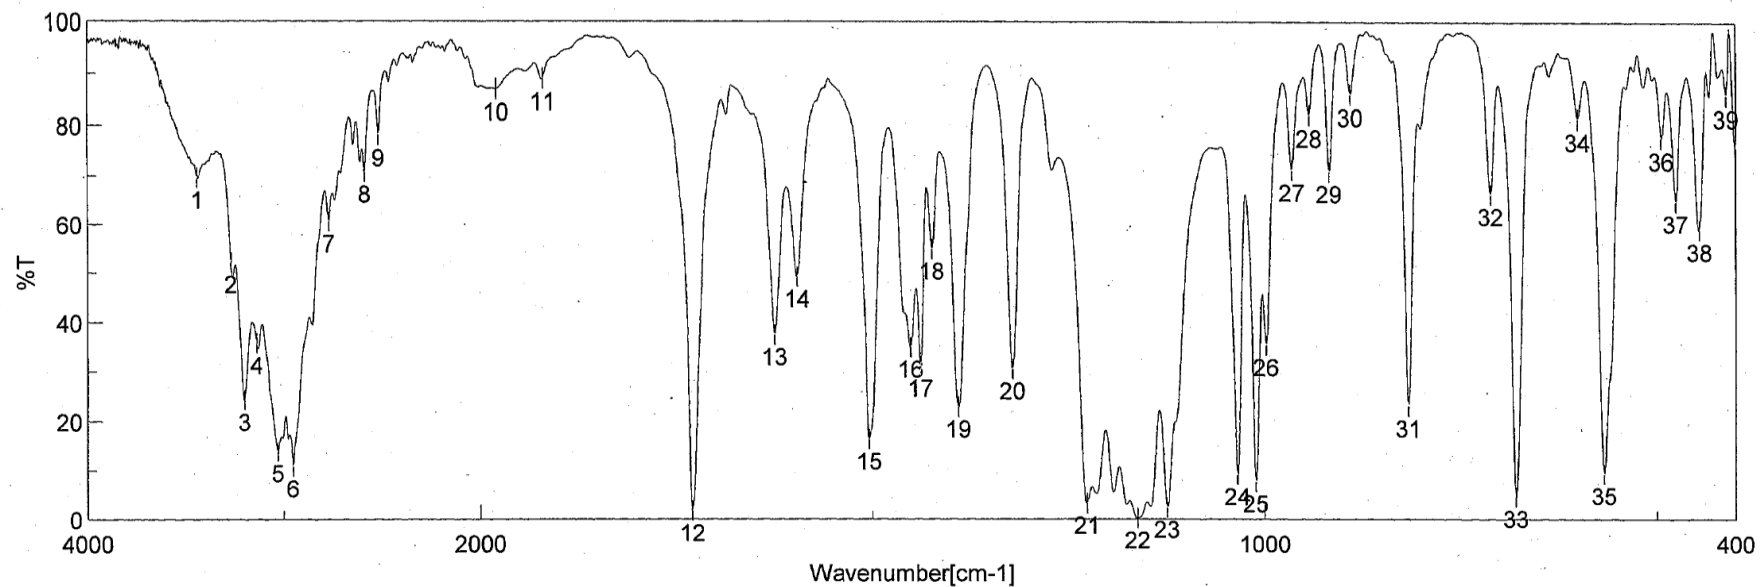

積算回数 12  
 ゼロフィリング ON  
 ゲイン 16  
 測定日時 2016/08/08 10:28  
 測定者 kawamata  
 ファイル名 Memory#2  
 サンプル名 TsOH methyl ester  
 コメント

分解 4 cm-1  
 アポダイゼーション Cosine  
 スキャンスピード 2 mm/sec  
 更新日時 2016/08/08 10:30

|              |       |              |       |              |       |              |       |
|--------------|-------|--------------|-------|--------------|-------|--------------|-------|
| 1: 3442.31,  | 69.61 | 2: 3270.68,  | 52.26 | 3: 3202.22,  | 24.36 | 4: 3139.54,  | 35.86 |
| 5: 3031.55,  | 13.92 | 6: 2953.45,  | 10.77 | 7: 2770.24,  | 60.66 | 8: 2587.04,  | 70.73 |
| 9: 2516.65,  | 78.12 | 10: 1979.57, | 86.99 | 11: 1919.79, | 89.06 | 12: 1729.83, | 1.71  |
| 13: 1625.70, | 37.63 | 14: 1596.77, | 49.40 | 15: 1504.20, | 16.44 | 16: 1451.17, | 35.10 |
| 17: 1438.64, | 31.20 | 18: 1424.17, | 55.07 | 19: 1390.42, | 22.96 | 20: 1321.00, | 30.70 |
| 21: 1226.51, | 3.32  | 22: 1161.90, | 0.28  | 23: 1124.30, | 2.49  | 24: 1034.62, | 9.18  |
| 25: 1011.48, | 7.74  | 26: 997.98,  | 35.57 | 27: 965.20,  | 71.19 | 28: 943.02,  | 81.87 |
| 29: 917.95,  | 70.91 | 30: 890.95,  | 85.97 | 31: 817.67,  | 23.13 | 32: 712.57,  | 66.31 |
| 33: 680.75,  | 4.65  | 34: 601.68,  | 81.22 | 35: 567.93,  | 9.32  | 36: 494.65,  | 77.55 |
| 37: 476.33,  | 64.96 | 38: 446.44,  | 59.14 | 39: 412.69,  | 85.78 |              |       |

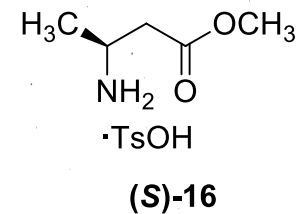

1H

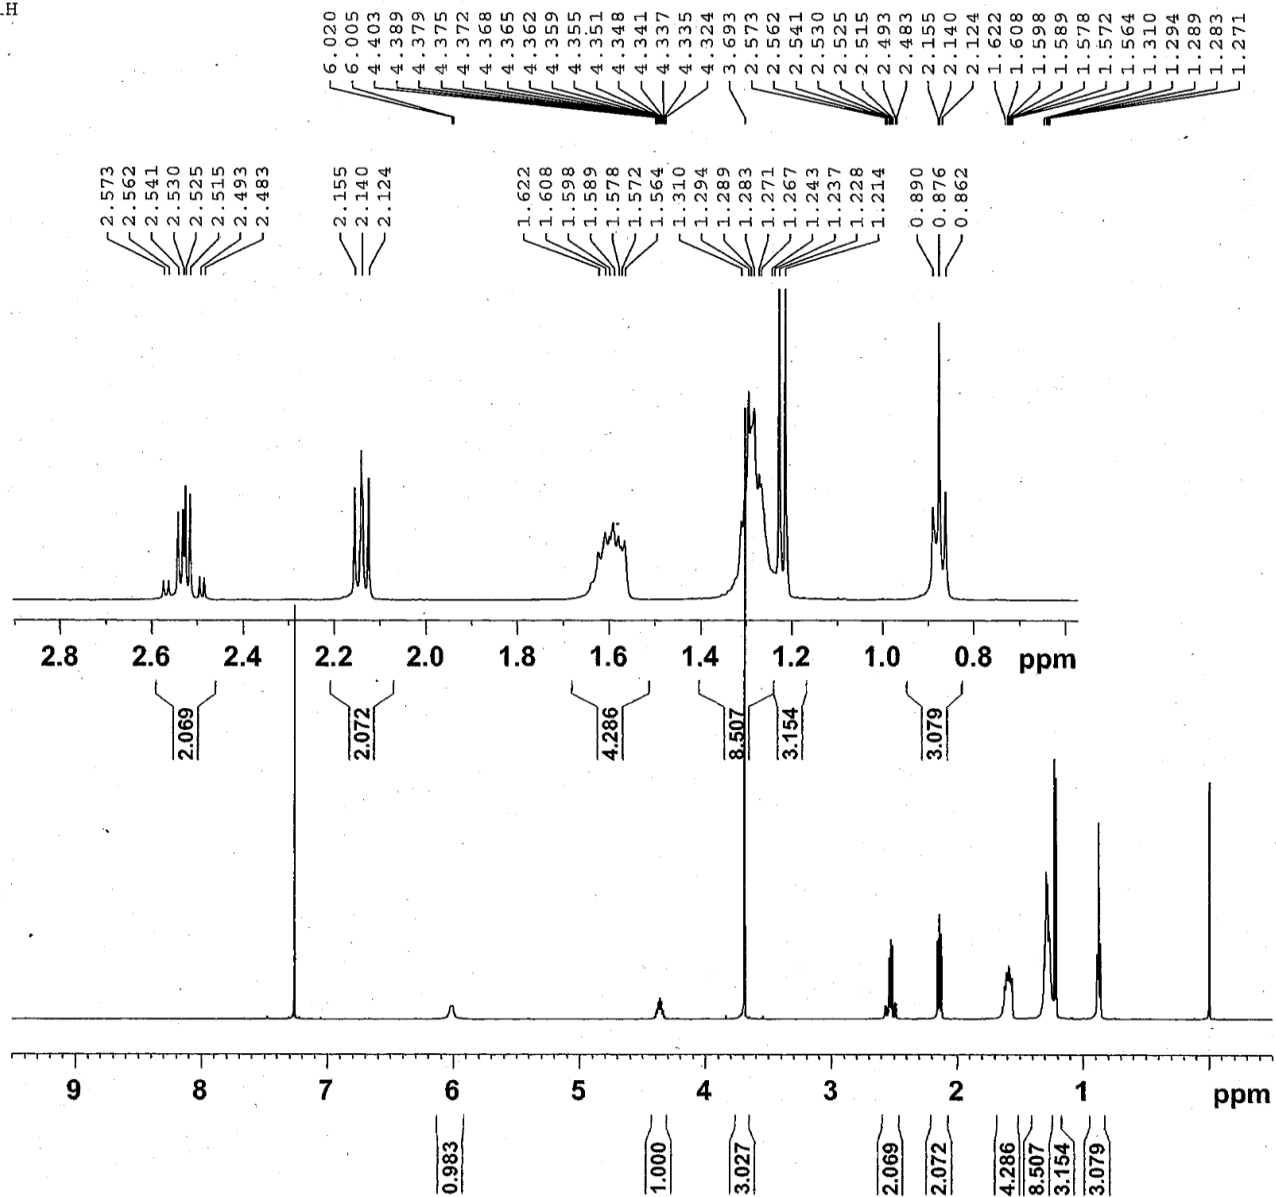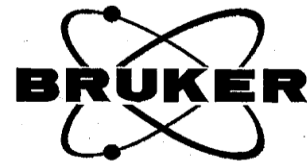

NAME A16mc211rk  
 EXPNO 17092901  
 PROCNO 1  
 Date 20170920  
 Time 12.52  
 INSTRUM spect  
 PROBHD 5 mm PABBO BB-  
 PULPROG zg30  
 TD 65536  
 SOLVENT CDCl3  
 NS 8  
 DS 2  
 SWH 10330.578 Hz  
 FIDRES 0.157632 Hz  
 AQ 3.1719923 sec  
 RG 203  
 DW 48.400 usec  
 DE 6.50 usec  
 TE 299.8 K  
 D1 1.00000000 sec  
 TDO 1

===== CHANNEL f1 =====  
 NUC1 1H  
 P1 11.80 usec  
 PL1 2.40 dB  
 PL1W 15.17711735 W  
 SFO1 500.0330885 MHz  
 SI 32768  
 SF 500.0300101 MHz  
 WDW EM  
 SSB 0  
 LB 0.30 Hz  
 GB 0  
 PC 1.00

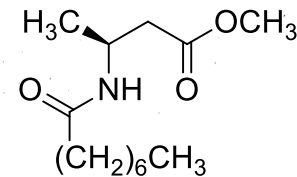

(S)-176

13C with Hdec

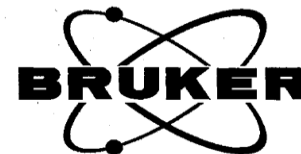

172.328  
172.269

51.607  
41.713  
39.715  
36.944  
31.663  
29.168  
28.970  
25.704  
22.575  
20.007  
14.025

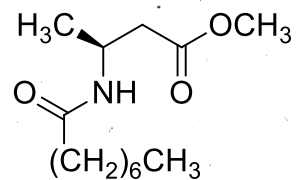

(S)-17<sub>6</sub>

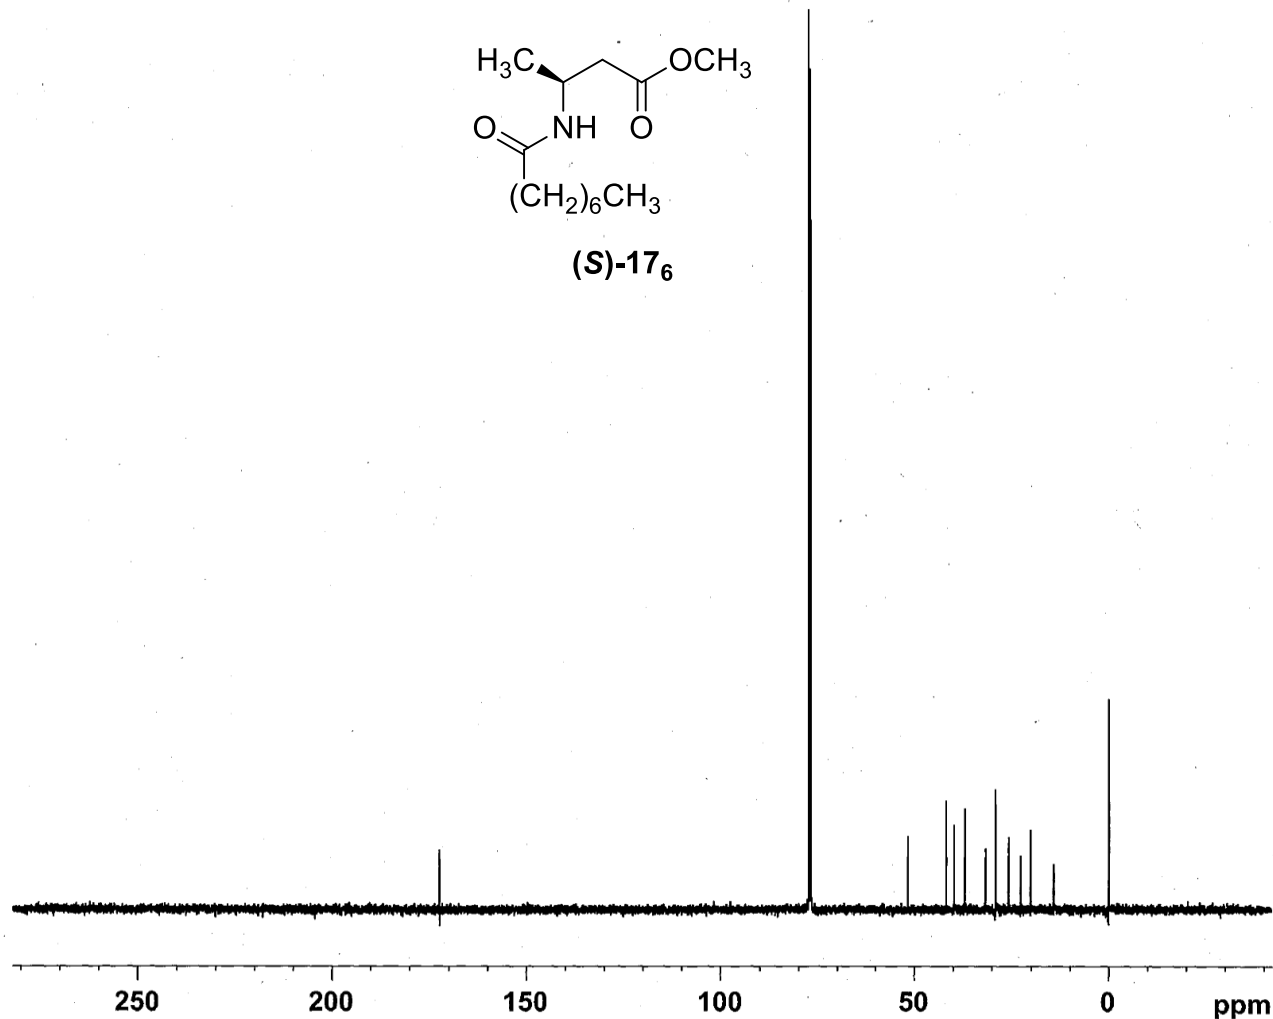

NAME A16mc211rk  
EXPNO 17091401  
PROCNO 1  
Date\_ 20170914  
Time 19.52  
INSTRUM spect  
PROBHD 5 mm PABBO BB-  
PULPROG zgpg30  
TD 65536  
SOLVENT CDCl3  
NS 632  
DS 2  
SWH 40760.871 Hz  
FIDRES 0.621962 Hz  
AQ 0.8039582 sec  
RG 203  
DW 12.267 usec  
DE 6.50 usec  
TE 302.0 K  
D1 2.00000000 sec  
D11 0.03000000 sec  
TD0 1

==== CHANNEL f1 =====  
NUC1 13C  
P1 9.80 usec  
PL1 0.00 dB  
PL1W 100.47545624 W  
SFO1 125.7477319 MHz

==== CHANNEL f2 =====  
CPDPRG2 waltz16  
NUC2 1H  
PCPD2 80.00 usec  
PL2 2.40 dB  
PL12 19.02 dB  
PL13 22.02 dB  
PL2W 15.17711735 W  
PL12W 0.33051354 W  
PL13W 0.16564916 W  
SFO2 500.0316016 MHz  
SI 16384  
SF 125.7326440 MHz  
WDW EM  
SSB 0  
LB 1.00 Hz  
GB 0  
PC 1.40

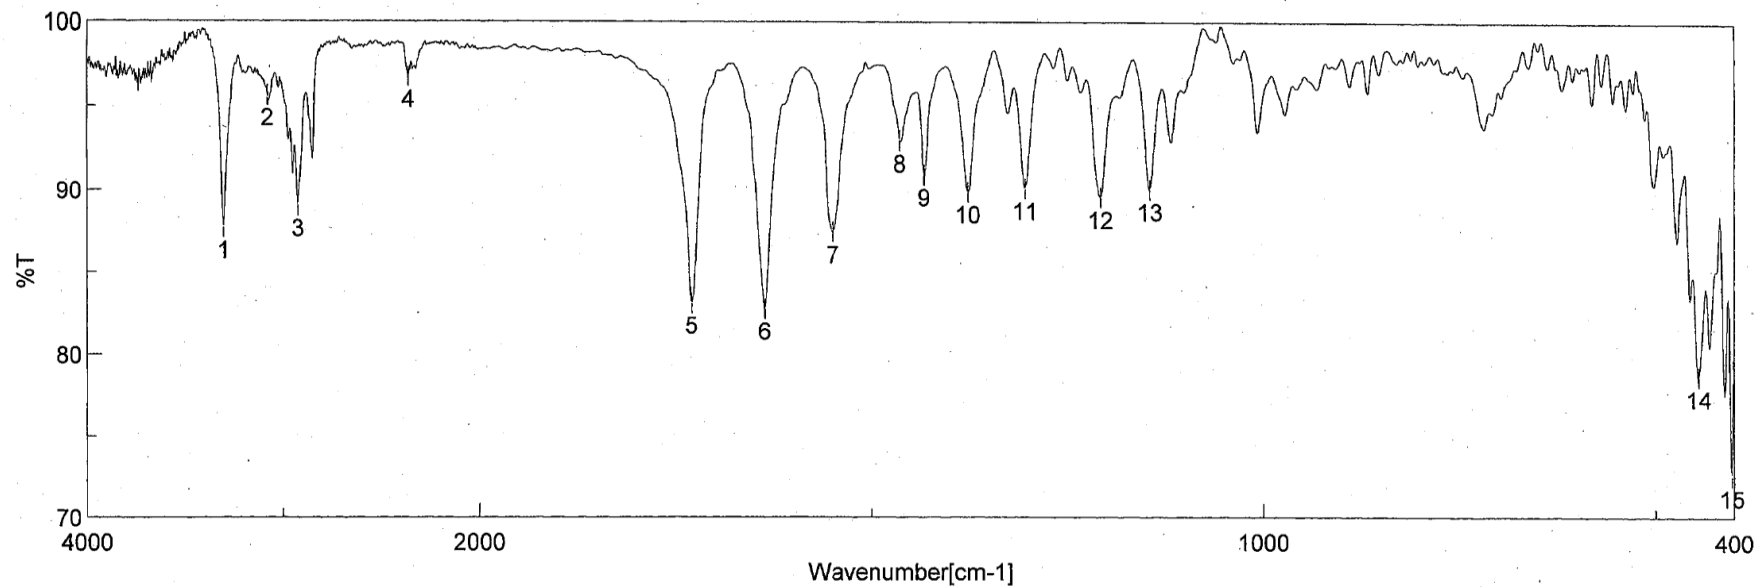

積算回数  
ゼロフィリング  
ゲイン  
測定日時  
測定者  
ファイル名  
サンプル名  
コメント

12  
ON  
8  
2016/08/08 10:43  
kawamata  
Memory#2  
(S)-10C8 methyl ester (CH3)

分解  
アポダイゼーション  
スキャンスピード  
更新日時

4 cm-1  
Cosine  
2 mm/sec  
2016/08/08 10:46

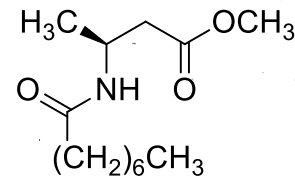

(S)-176

|     |          |       |     |          |       |     |          |       |     |          |       |
|-----|----------|-------|-----|----------|-------|-----|----------|-------|-----|----------|-------|
| 1:  | 3304.43, | 87.71 | 2:  | 3081.69, | 95.64 | 3:  | 2926.45, | 89.02 | 4:  | 2361.41, | 96.74 |
| 5:  | 1729.83, | 83.15 | 6:  | 1636.30, | 82.80 | 7:  | 1549.52, | 87.46 | 8:  | 1463.71, | 92.94 |
| 9:  | 1432.85, | 90.90 | 10: | 1376.93, | 89.88 | 11: | 1303.64, | 90.11 | 12: | 1207.22, | 89.58 |
| 13: | 1144.55, | 90.06 | 14: | 445.48,  | 78.76 | 15: | 403.05,  | 72.58 |     |          |       |



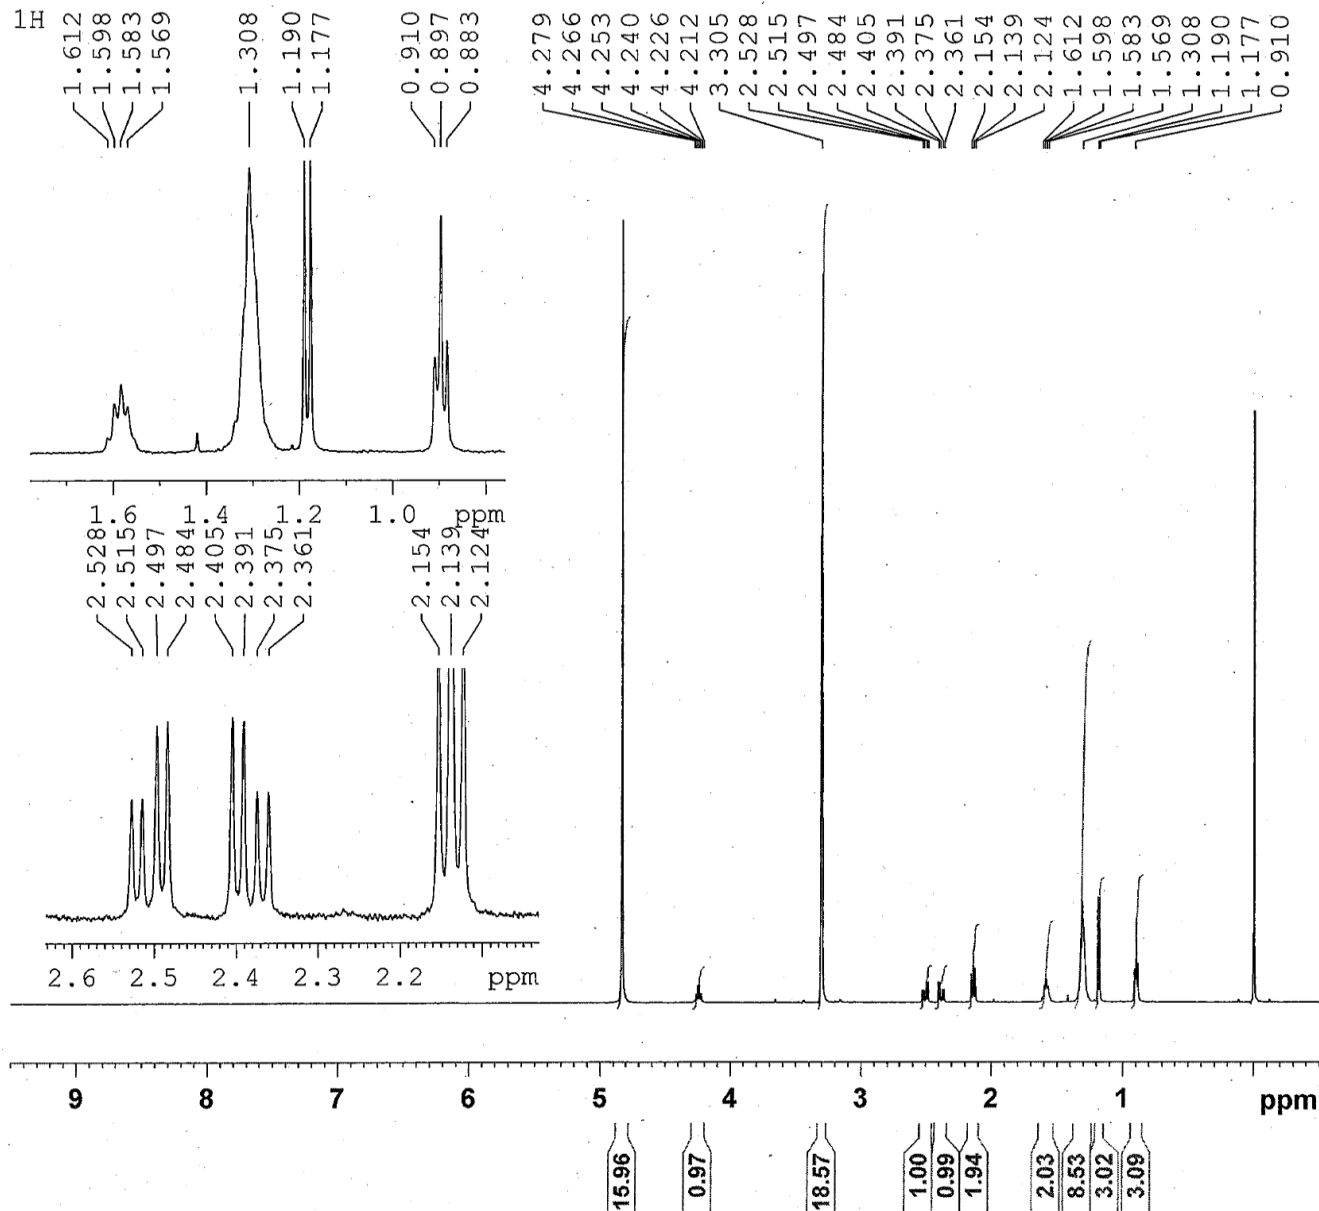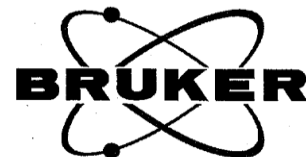

NAME A16mc211rk  
 EXPNO 16083001  
 PROCNO 1  
 Date\_ 20160830  
 Time\_ 9.54  
 INSTRUM spect  
 PROBHD 5 mm PABBO BB-  
 PULPROG zg30  
 TD 65536  
 SOLVENT MeOD  
 NS 8  
 DS 2  
 SWH 10330.578 Hz  
 FIDRES 0.157632 Hz  
 AQ 3.1719923 sec  
 RG 203  
 DW 48.400 usec  
 DE 6.50 usec  
 TE 301.9 K  
 D1 1.00000000 sec  
 TDO 1

==== CHANNEL f1 =====  
 NUC1 <sup>1</sup>H  
 P1 12.00 usec  
 PL1 2.60 dB  
 PL1W 15.32226563 W  
 SF01 500.1330885 MHz  
 SI 32768  
 SF 500.1300129 MHz  
 WDW EM  
 SSB 0  
 LB 0.30 Hz  
 GB 0  
 PC 1.00

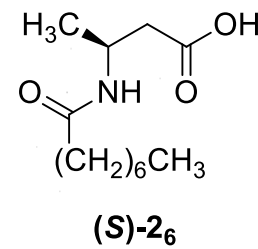

<sup>13</sup>C with Hdec

175.33  
173.07

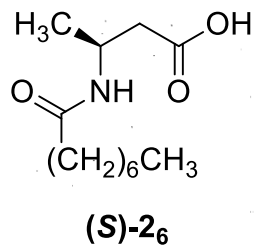

41.85  
39.91  
36.65  
31.64  
29.15  
28.95  
25.67  
22.58  
20.04  
14.03

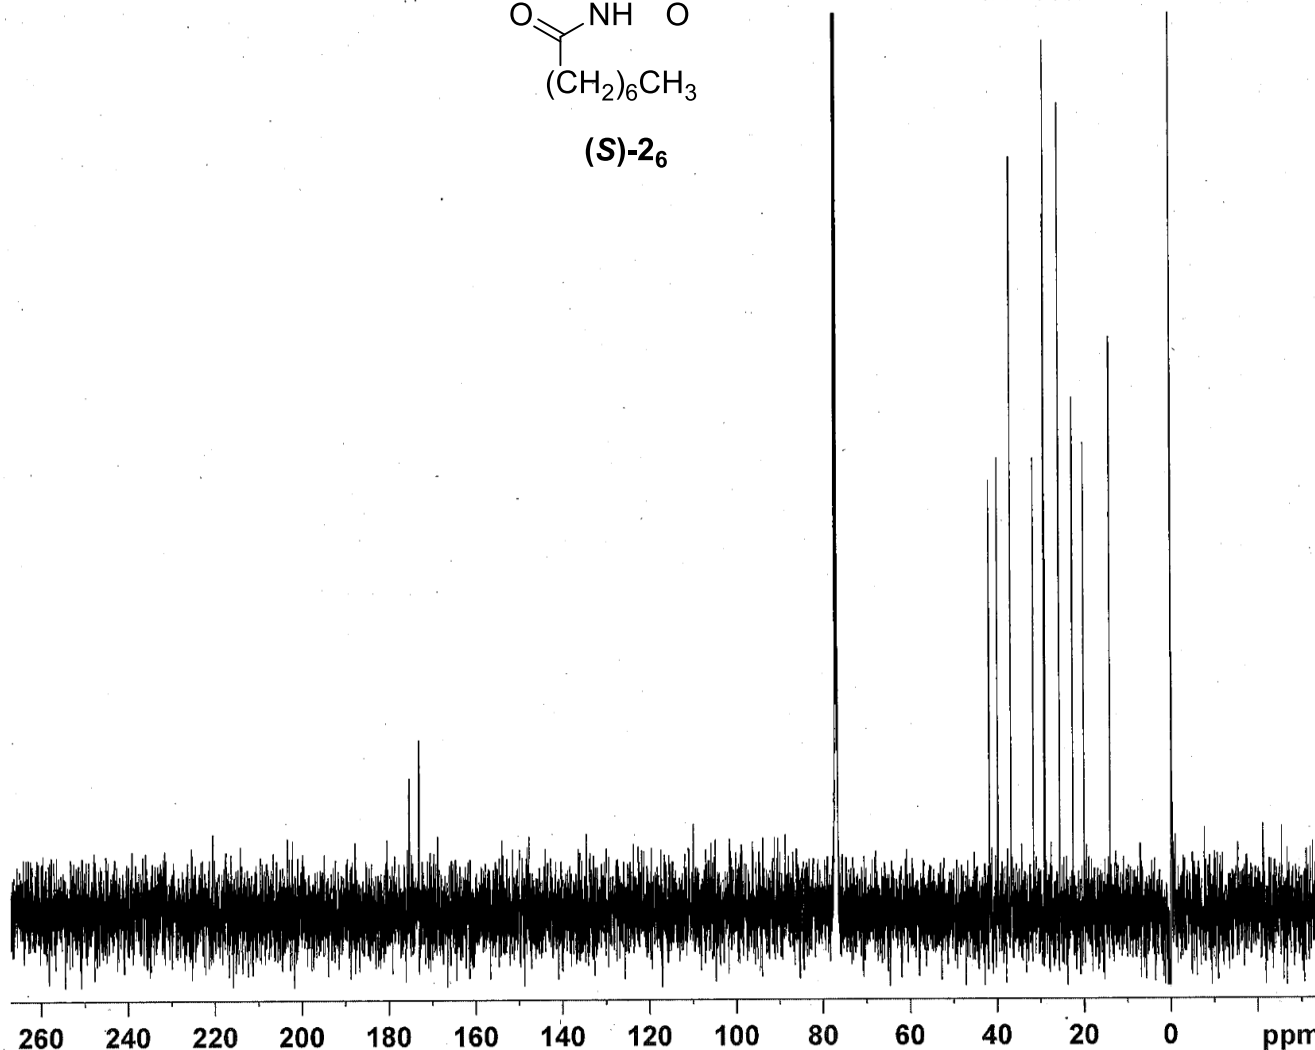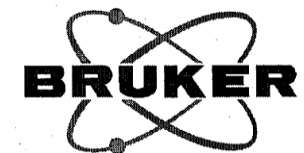

Current Data Parameters  
NAME Al6mc211rk  
EXPNO 17091501  
PROCNO 1

F2 - Acquisition Parameters  
Date\_ 20170915  
Time 11.35  
INSTRUM spect  
PROBHD 5 mm PABBO BB-  
PULPROG zgpg30  
TD 65536  
SOLVENT CDC13  
NS 1024  
DS 2  
SWH 40760.871 Hz  
FIDRES 0.621962 Hz  
AQ 0.8039582 sec  
RG 203  
DW 12.267 usec  
DE 6.50 usec  
TE 301.7 K  
D1 2.00000000 sec  
D11 0.03000000 sec  
TD0 1

==== CHANNEL f1 =====  
NUC1 13C  
P1 9.80 usec  
PL1 0 dB  
PL1W 100.47545624 W  
SFO1 125.7477319 MHz

==== CHANNEL f2 =====  
CPDPRG2 waltz16  
NUC2 1H  
PCPD2 80.00 usec  
PL2 2.40 dB  
PL12 19.02 dB  
PL13 22.02 dB  
PL2W 15.17711735 W  
PL12W 0.33051354 W  
PL13W 0.16564916 W  
SFO2 500.0316016 MHz

F2 - Processing parameters  
SI 16384  
SF 125.7326440 MHz  
WDW EM  
SSB 0  
LB 1.00 Hz  
GB 0  
PC 1.40

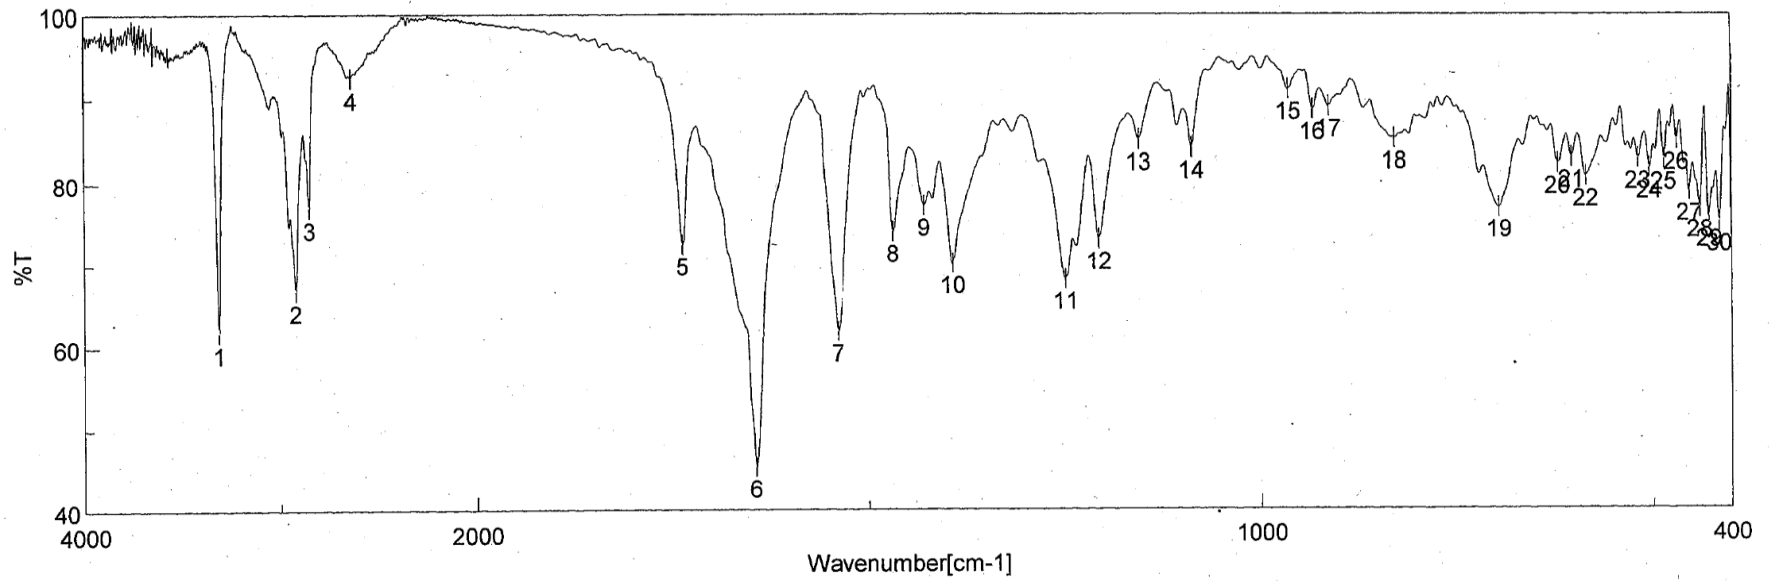

積算回数  
ゼロフィリング  
ゲイン  
測定日時  
測定者  
ファイル名  
サンプル名  
コメント

16  
ON  
16  
2016/09/05 12:09  
kawamata  
Memory#2  
CH3 C8

分解  
アポダイゼーション  
スキャンスピード  
更新日時

4 cm-1  
Cosine  
2 mm/sec  
2016/09/05 12:11

|     |          |       |     |          |       |     |          |       |     |          |       |
|-----|----------|-------|-----|----------|-------|-----|----------|-------|-----|----------|-------|
| 1:  | 3316.00, | 61.78 | 2:  | 2922.59, | 66.91 | 3:  | 2852.20, | 77.10 | 4:  | 2637.18, | 92.56 |
| 5:  | 1738.51, | 72.61 | 6:  | 1644.98, | 45.32 | 7:  | 1539.88, | 61.93 | 8:  | 1468.53, | 74.17 |
| 9:  | 1428.99, | 77.30 | 10: | 1392.35, | 70.31 | 11: | 1248.68, | 68.35 | 12: | 1206.26, | 73.21 |
| 13: | 1155.15, | 85.17 | 14: | 1087.66, | 84.20 | 15: | 964.23,  | 91.15 | 16: | 933.38,  | 88.76 |
| 17: | 913.13,  | 89.09 | 18: | 829.24,  | 85.26 | 19: | 696.18,  | 77.00 | 20: | 620.97,  | 82.27 |
| 21: | 603.61,  | 83.02 | 22: | 585.29,  | 80.78 | 23: | 518.76,  | 82.85 | 24: | 504.29,  | 81.72 |
| 25: | 485.97,  | 82.75 | 26: | 469.58,  | 85.09 | 27: | 453.19,  | 79.01 | 28: | 439.69,  | 76.99 |
| 29: | 428.12,  | 75.82 | 30: | 415.58,  | 75.28 |     |          |       |     |          |       |

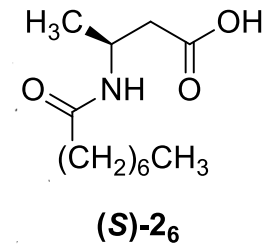

1H

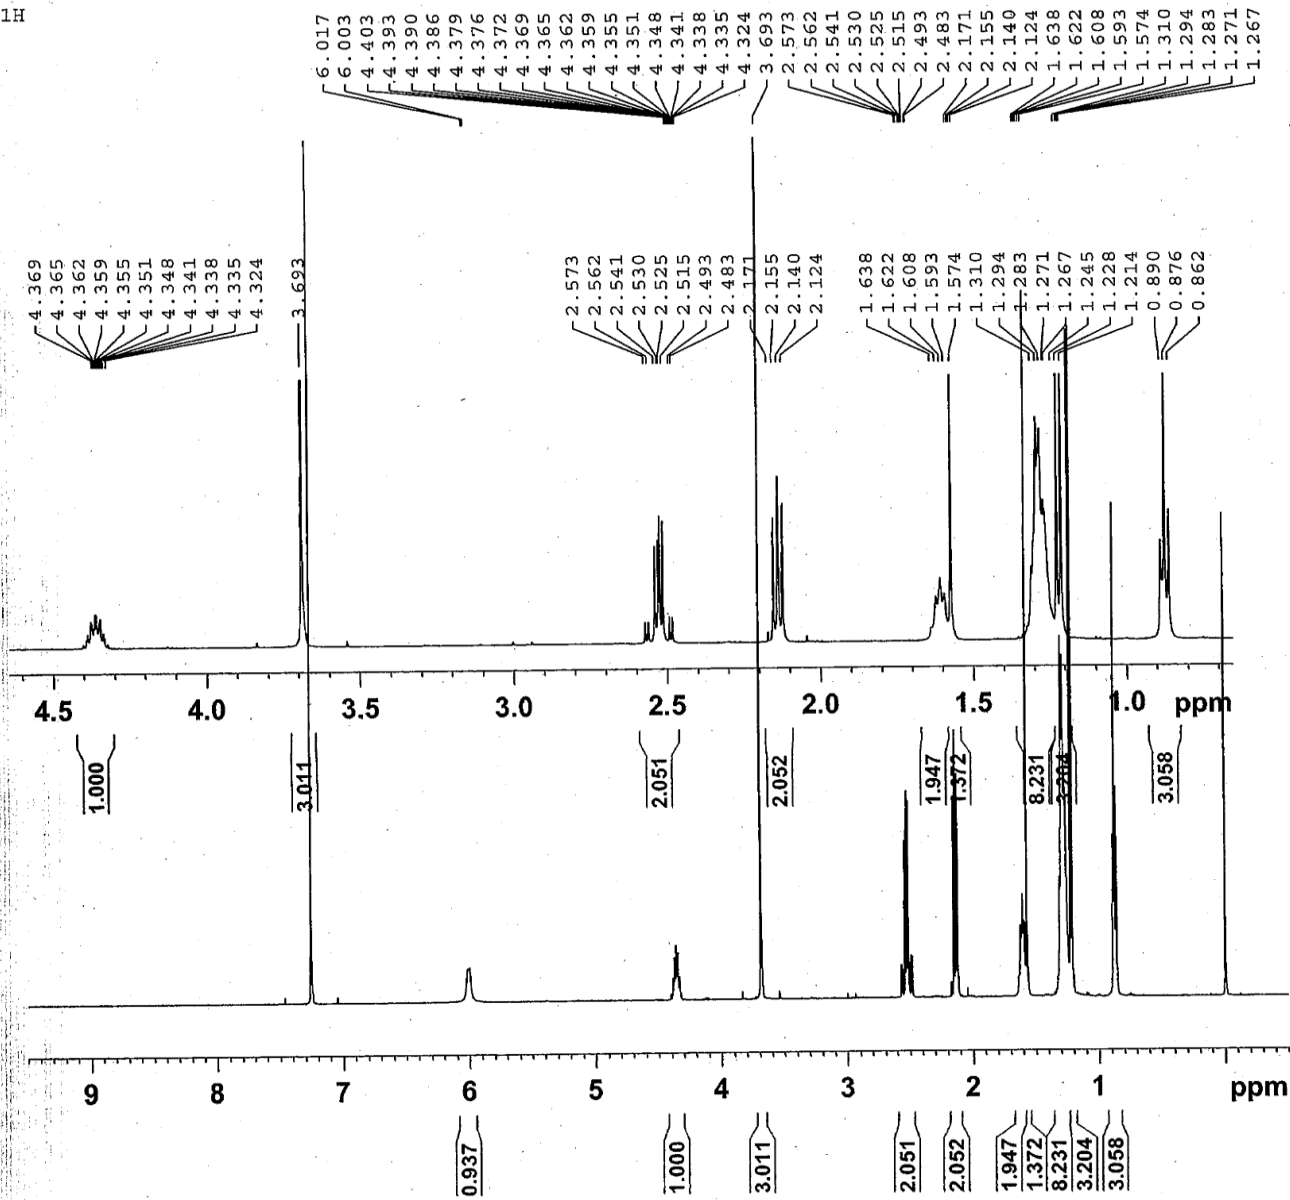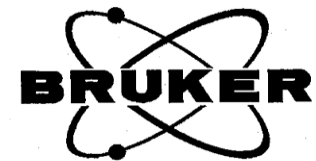

NAME A16mc211rk  
 EXPNO 16120102  
 PROCNO 1  
 Date 20161201  
 Time 17.35  
 INSTRUM spect  
 PROBHD 5 mm PABBO BB-  
 PULPROG zg30  
 TD 65536  
 SOLVENT CDCl3  
 NS 8  
 DS 2  
 SWH 10330.578 Hz  
 FIDRES 0.157632 Hz  
 AQ 3.1719923 sec  
 RG 203  
 DW 48.400 usec  
 DE 6.50 usec  
 TE 299.8 K  
 D1 1.00000000 sec  
 TD0 1

==== CHANNEL f1 =====  
 NUC1 1H  
 P1 11.80 usec  
 PL1 2.40 dB  
 PL1W 15.17711735 W  
 SFO1 500.0330885 MHz  
 SI 32768  
 SF 500.0300105 MHz  
 WDW EM  
 SSB 0  
 LB 0.30 Hz  
 GB 0  
 PC 1.00

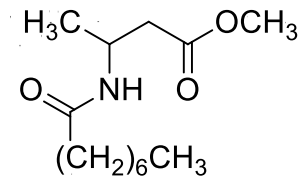

rac-17<sub>6</sub>

13C with Hdec

172.327  
172.233

51.587  
41.716  
39.734  
36.922  
31.661  
29.168  
28.971  
25.692  
22.559  
20.007  
14.011

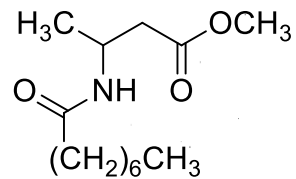

*rac-17<sub>6</sub>*

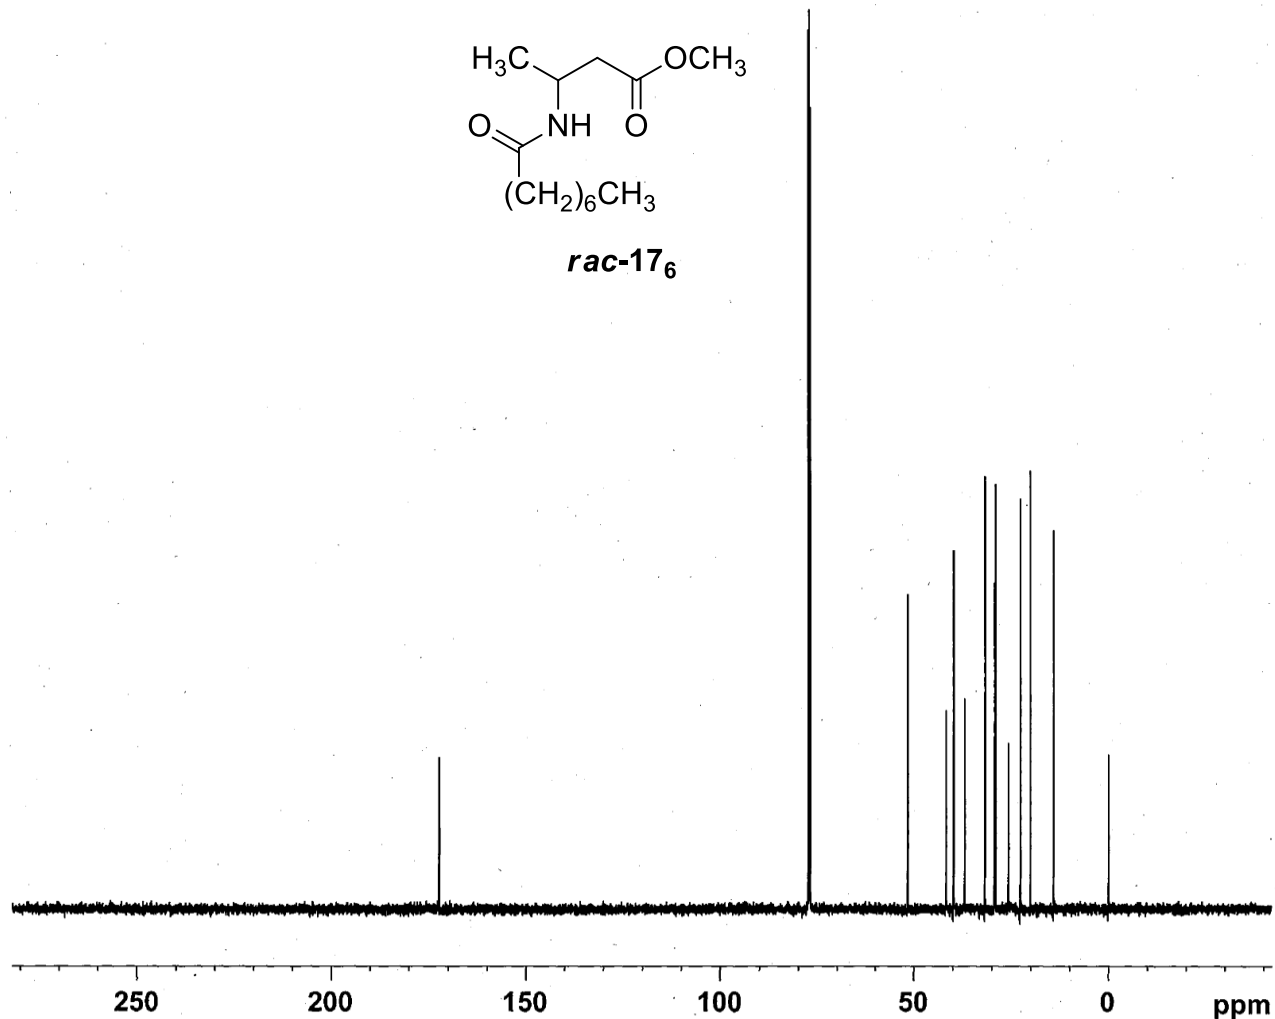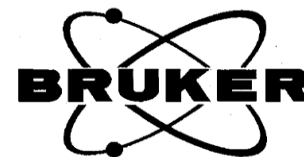

NAME A16mc211rk  
EXPNO 17091902  
PROCNO 1  
Date\_ 20170919  
Time\_ 11.24  
INSTRUM spect  
PROBHD 5 mm PABBO BB-  
PULPROG zgpg30  
TD 65536  
SOLVENT CDCl3  
NS 337  
DS 2  
SWH 40760.871 Hz  
FIDRES 0.621962 Hz  
AQ 0.8039582 sec  
RG 203  
DW 12.267 usec  
DE 6.50 usec  
TE 301.6 K  
D1 2.00000000 sec  
D11 0.03000000 sec  
TDO 1

==== CHANNEL f1 =====  
NUC1 13C  
P1 9.80 usec  
PL1 0.00 dB  
PL1W 100.47545624 W  
SFO1 125.7477319 MHz

==== CHANNEL f2 =====  
CPDPRG2 waltz16  
NUC2 1H  
PCPD2 80.00 usec  
PL2 2.40 dB  
PL12 19.02 dB  
PL13 22.02 dB  
PL2W 15.17711735 W  
PL12W 0.33051354 W  
PL13W 0.16564916 W  
SFO2 500.0316016 MHz  
SI 16384  
SF 125.7326440 MHz  
WDW EM  
SSB 0  
LB 1.00 Hz  
GB 0  
PC 1.40

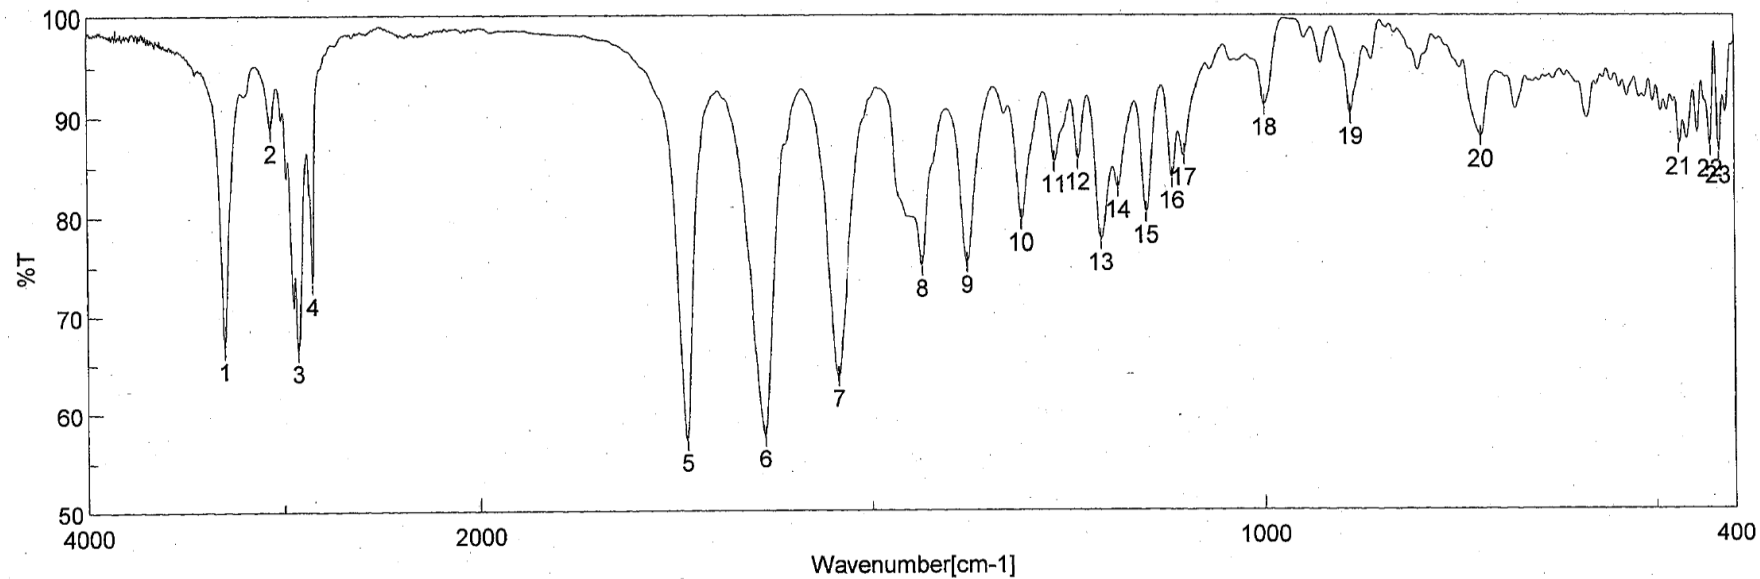

積算回数  
ゼロフィリング  
ゲイン  
測定日時  
測定者  
ファイル名  
サンプル名  
コメント

16  
ON  
8  
2017/09/19 13:55  
kawamata  
Memory#2  
rac-ch3-C7-COOme

分解  
アポダイゼーション  
スキャンスピード  
更新日時

4 cm-1  
Cosine  
2 mm/sec  
2017/09/19 13:57

|              |       |              |       |              |       |              |       |
|--------------|-------|--------------|-------|--------------|-------|--------------|-------|
| 1: 3302.50,  | 66.68 | 2: 3065.30,  | 88.72 | 3: 2927.41,  | 66.43 | 4: 2854.13,  | 73.33 |
| 5: 1736.58,  | 57.17 | 6: 1637.27,  | 57.58 | 7: 1543.74,  | 63.69 | 8: 1435.74,  | 75.05 |
| 9: 1377.89,  | 75.42 | 10: 1308.46, | 79.62 | 11: 1266.04, | 85.43 | 12: 1236.15, | 85.67 |
| 13: 1207.22, | 77.70 | 14: 1185.04, | 82.88 | 15: 1149.37, | 80.37 | 16: 1116.58, | 83.81 |
| 17: 1101.15, | 86.14 | 18: 998.95,  | 91.06 | 19: 889.02,  | 90.14 | 20: 723.18,  | 87.86 |
| 21: 470.55,  | 87.09 | 22: 431.01,  | 86.85 | 23: 420.41,  | 86.22 |              |       |

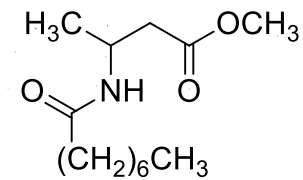

**rac-17<sub>6</sub>**

1H

7.898  
7.885

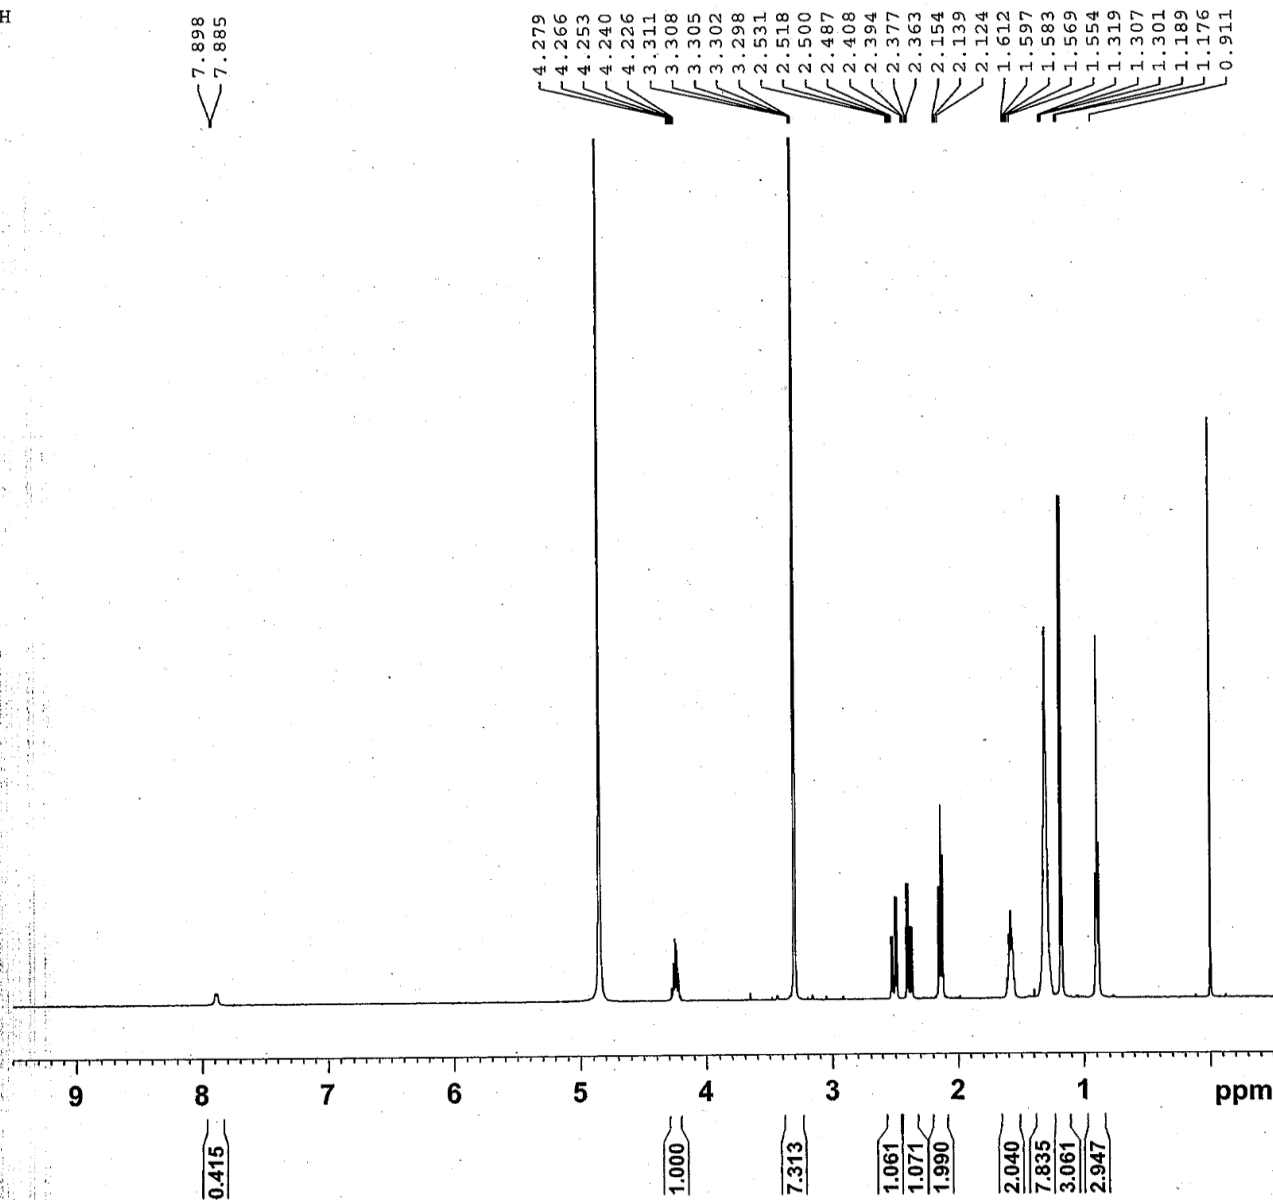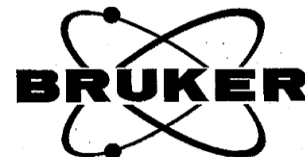

NAME A16mc211rk  
 EXPNO 16120203  
 PROCNO 1  
 Date\_ 20161202  
 Time 12.20  
 INSTRUM spect  
 PROBHD 5 mm PABBO BB-  
 PULPROG zg30  
 TD 65536  
 SOLVENT MeOD  
 NS 8  
 DS 2  
 SWH 10330.578 Hz  
 FIDRES 0.157632 Hz  
 AQ 3.1719923 sec  
 RG 203  
 DW 48.400 usec  
 DE 6.50 usec  
 TE 299.7 K  
 D1 1.00000000 sec  
 TDO 1

==== CHANNEL f1 =====  
 NUC1 1H  
 P1 11.80 usec  
 PL1 2.40 dB  
 PL1W 15.17711735 W  
 SFO1 500.0330885 MHz  
 SI 32768  
 SF 500.0300109 MHz  
 WDW EM  
 SSB 0  
 LB 0.30 Hz  
 GB 0  
 PC 1.00

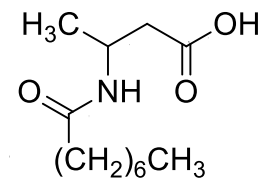

rac-2<sub>6</sub>

13C with Hdec

175.532  
173.299

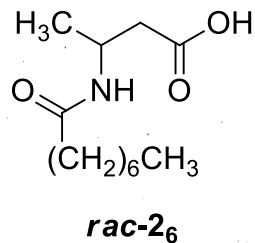

41.892  
39.832  
36.823  
31.642  
29.129  
28.942  
25.688  
22.560  
19.962  
14.025

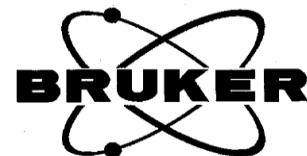

NAME A16mc211rk  
EXPNO 17091901  
PROCNO 1  
Date 20170919  
Time 10.21  
INSTRUM spect  
PROBHD 5 mm PABBO BB-  
PULPROG zgpg30  
TD 65536  
SOLVENT CDCl3  
NS 662  
DS 2  
SWH 40760.871 Hz  
FIDRES 0.621962 Hz  
AQ 0.8039582 sec  
RG 203  
DW 12.267 usec  
DE 6.50 usec  
TE 301.5 K  
D1 2.00000000 sec  
D11 0.03000000 sec  
TD0 1

==== CHANNEL f1 =====  
NUC1 13C  
P1 9.80 usec  
PL1 0.00 dB  
PL1W 100.47545624 W  
SFO1 125.7477319 MHz

==== CHANNEL f2 =====  
CPDPRG2 waltz16  
NUC2 1H  
PCPD2 80.00 usec  
PL2 2.40 dB  
PL12 19.02 dB  
PL13 22.02 dB  
PL2W 15.17711735 W  
PL12W 0.33051354 W  
PL13W 0.16564916 W  
SFO2 500.0316016 MHz  
SI 16384  
SF 125.7326440 MHz  
WDW EM  
SSB 0  
LB 1.00 Hz  
GB 0  
PC 1.40

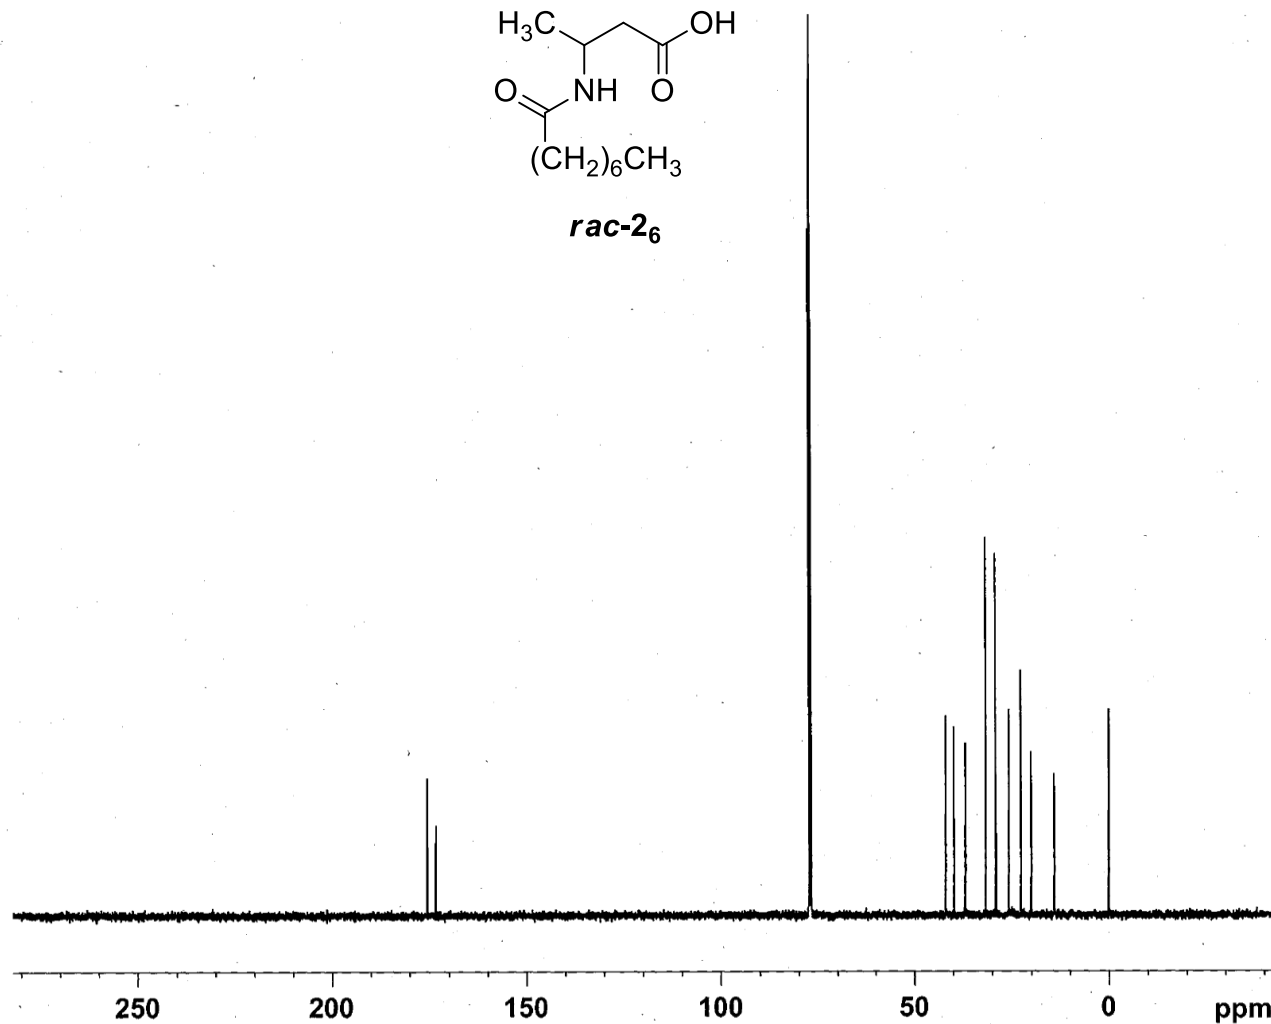



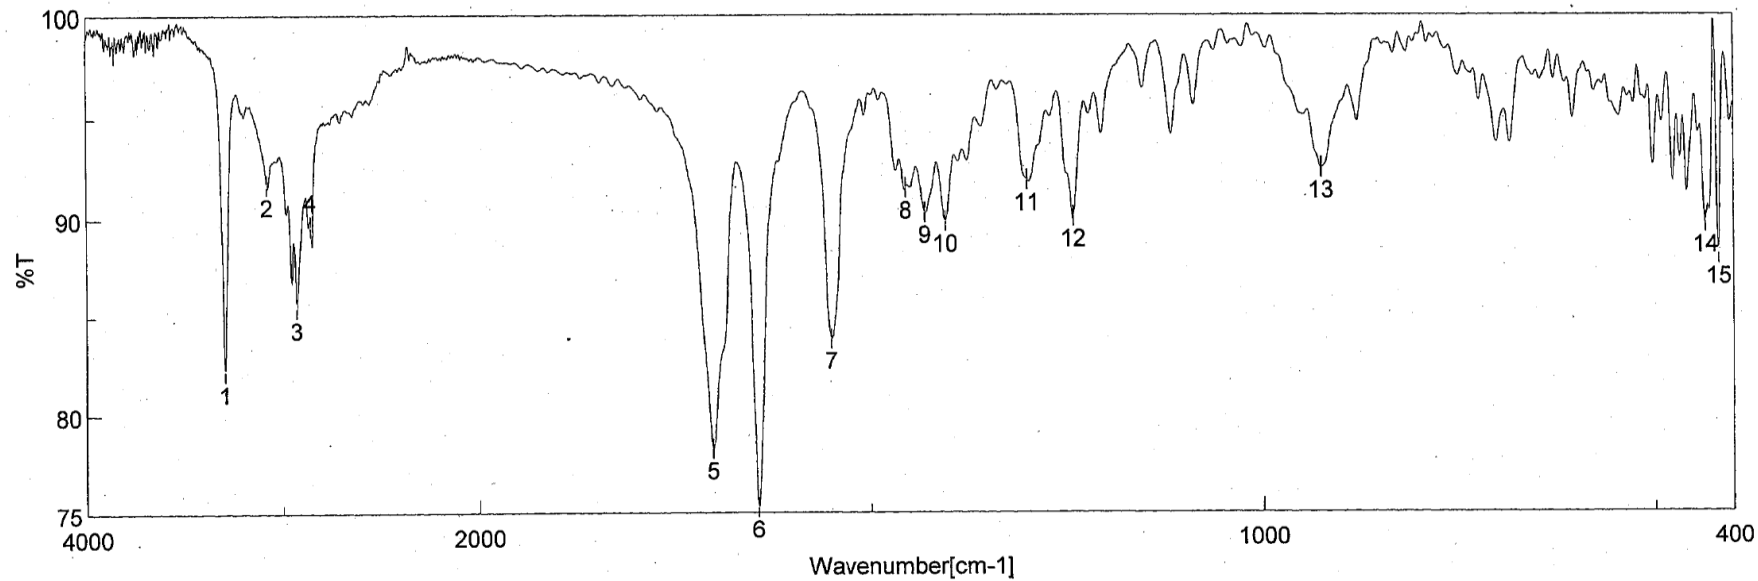

積算回数  
ゼロフィリング  
ゲイン  
測定日時  
測定者  
ファイル名  
サンプル名  
コメント

16  
ON  
8  
2017/09/19 14:09  
kawamata  
Memory#2  
rac-ch3-C7-COOH

分解  
アポダイゼーション  
スキャンスピード  
更新日時

4 cm-1  
Cosine  
2 mm/sec  
2017/09/19 14:12

|             |       |              |       |              |       |              |       |
|-------------|-------|--------------|-------|--------------|-------|--------------|-------|
| 1: 3295.75, | 82.22 | 2: 3081.69,  | 91.76 | 3: 2931.27,  | 85.47 | 4: 2860.88,  | 89.68 |
| 5: 1702.84, | 78.28 | 6: 1644.98,  | 75.28 | 7: 1551.45,  | 83.87 | 8: 1455.03,  | 91.56 |
| 9: 1430.92, | 90.32 | 10: 1404.89, | 89.88 | 11: 1299.79, | 91.95 | 12: 1240.97, | 90.13 |
| 13: 925.66, | 92.55 | 14: 435.83,  | 89.81 | 15: 419.44,  | 88.22 |              |       |

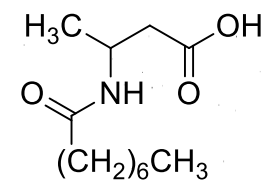

**rac-2<sub>6</sub>**
